# Supplementary material for: Complete genome sequences and genomic characterization of five plasmids harbored by environmentally persistent Cronobacter sakazakii strains ST83 H322 and ST64 GK1025B obtained from powdered infant formula manufacturing facilities
Source: Gut Pathog. 2022 Jun 6;14:23. doi: 10.1186/s13099-022-00500-5 (PMC9169379; doi:10.1186/s13099-022-00500-5)
Supplement: Supplementary file 2 — Additional file 2: Table S2. Results of PHASTER analysis for various Cronobacter plasmids including pH322_1, pH322_2, pGK1025B_1, pGK1025B_2, and pGK1025B_3.a. [file 13099_2022_500_MOESM2_ESM.xlsx]

## Sheet: Phaster - Plasmid
Table S2. Results of PHASTER analysis for various Cronobacter plasmids including pH322_1, pH322_2, pGK1025B_1, pGK1025B_2, and pGK1025B_3.a
Strain	NCBI Accession Number	REGION	REGION_LENGTH (Kb)	COMPLETENESS(score)	SPECIFIC_KEYWORD	REGION_POSITION	TRNA_NUM	TOTAL_PROTEIN_NUM	PHAGE_HIT_PROTEIN_NUM	HYPOTHETICAL_PROTEIN_NUM	PHAGE+HYPO_PROTEIN_PERCENTAGE	BACTERIAL_PROTEIN_NUM	ATT_SITE_SHOWUP	PHAGE_SPECIES_NUM	Most Common Phage hit	FIRST_MOST_COMMON_PHAGE_NUM	FIRST_MOST_COMMON_PHAGE_PERCENTAGE	GC_PERCENTAGE
CmuyJz38_1	NZ_CP017663	1	108.5Kb	intact(150)	lysin,integrase,recombinase,tail,terminase,capsid	297-108823	0	141	109	32	1	0	yes	17	PHAGE_Salmon_SSU5_NC_018843(91)	92	0.6453	0.4904
p505108-MDR	NZ_KY978628	1	8.3Kb	incomplete(30)	transposase	15475-23835	0	12	6	6	1	0	no	4	PHAGE_Salmon_SJ46_NC_031129(3)	2	0.25	0.3959
p505108-MDR	NZ_KY978628	2	14.2Kb	incomplete(50)	tail,terminase	73022-87232	0	20	10	10	1	0	no	8	PHAGE_Acinet_vB_AbaM_ME3_NC_041884(3)	2	0.15	0.4978
p505108-MDR	NZ_KY978628	3	21.1Kb	questionable(90)	transposase,tail,integrase	115208-136342	0	27	12	15	1	0	no	8	PHAGE_Escher_RCS47_NC_042128(3)	3	0.1111	0.5084
p505108-MDR	NZ_KY978628	4	43.3Kb	intact(130)	transposase,integrase,capsid,tail	212795-256115	0	36	22	14	1	0	yes	13	PHAGE_Escher_RCS47_NC_042128(6)	6	0.1666	0.5376
p505108-NDM	NZ_KY978629	1	11.7Kb	incomplete(20)	transposase	3249-15001	0	14	10	4	1	0	yes	6	PHAGE_Escher_RCS47_NC_042128(5)	5	0.3571	0.5747
pCS1	CP012254	1	105.5Kb	intact(150)	tail,lysin,transposase,integrase,recombinase,terminase,capsid	2403-107936	0	134	111	23	1	0	yes	13	PHAGE_Salmon_SSU5_NC_018843(96)	96	0.7164	0.5046
pGW1	CP028975	1	38.7Kb	intact(130)	transposase,capsid,integrase	16647-55444	0	45	14	31	1	0	yes	9	PHAGE_Escher_RCS47_NC_042128(3)	4	0.0666	0.5571
pGW1	CP028975	2	17.3Kb	questionable(80)	transposase,tail,integrase	60548-77859	0	27	11	16	1	0	no	8	PHAGE_Escher_RCS47_NC_042128(3)	3	0.1111	0.5119
pGW1	CP028975	3	23.8Kb	questionable(80)	transposase,tail,terminase	198530-222395	0	24	11	13	1	0	yes	8	PHAGE_Acinet_vB_AbaM_ME3_NC_041884(3)	3	0.125	0.5355
pGW1	CP028975	4	8.3Kb	incomplete(50)	plate,transposase,portal	294254-302577	0	13	8	5	1	0	no	4	PHAGE_Escher_RCS47_NC_042128(4)	4	0.3076	0.4456
pGK1025_1	CP078107	1	99.4Kb	intact(150)	terminase,capsid,tail,lysin,integrase,recombinase	825-100270	0	138	112	26	1	0	yes	13	PHAGE_Salmon_SSU5_NC_018843(91)	99	0.6594	0.5114
pH322_1_pCS1-like	NZ_CP078111	1	96.9Kb	intact(150)	lysin,tail,capsid,terminase,transposase,recombinase,integrase	2583-99573	0	128	102	26	1	0	yes	15	PHAGE_Salmon_SSU5_NC_018843(85)	85	0.664	0.5043
CmuyJz38_2	NZ_CP017664	No Phage Found
CSK29544_1p	CP011048	No Phage Found
CSK29544_2p	CP011049	No Phage Found
CSK29544_3p	CP011050	No Phage Found
p1	CP006732	No Phage Found
p2	CP006733	No Phage Found
p505108-T6SS	NZ_KY978630	No Phage Found
pCCO1	CP012265	No Phage Found
pCDU1	CP012267	No Phage Found
pCMA1	CP013941	No Phage Found
pCMA2	CP013942	No Phage Found
pCS2	CP012255	No Phage Found
pCS3	CP012256	No Phage Found
pCSA2	CP027110	No Phage Found
pCsaCS09a	CP027110	No Phage Found
pCTU1	FN543094	No Phage Found
pCTU2	FN543095	No Phage Found
pCTU3	FN543096	No Phage Found
pCUNV1	CP012258	No Phage Found
pESA2	CP000784	No Phage Found
pESA3	CP000785	No Phage Found
pGW2	CP028976	No Phage Found
pSP291-1	CP004092	No Phage Found
pSP291-2	CP004093	No Phage Found
pSP291-3	CP004093	No Phage Found
pGK1025_2	CP078108	No Phage Found
pGK1025_3	CP078109	No Phage Found
pH322_2	CP078112	No Phage Found
aArndt D, Grant JR, Marcu A, Sajed T, Pon A, Liang Y, Wishart DS. PHASTER: a better, faster version of the PHAST phage search tool. Nucleic Acids Res. 2016; 8:44(W1): W16-21. http://doi:10.1093/nar/gkw387.

## Sheet: Phaster - Chromosome
Strain	NCBI Accession Number	REGION	REGION_LENGTH (Kb)	COMPLETENESS(score)	REGION_POSITION	TRNA_NUM	TOTAL_PROTEIN_NUM	PHAGE_HIT_PROTEIN_NUM	HYPOTHETICAL_PROTEIN_NUM	PHAGE+HYPO_PROTEIN_PERCENTAGE	BACTERIAL_PROTEIN_NUM	ATT_SITE_SHOWUP	Most Common Phage hit	GC_PERCENTAGE
H322 Chromosome	CP078110	1	47.4Kb	intact (150)	702751-750186	2	69	61	8	1	0	yes	PHAGE_Salmon_SEN34_NC_028699	0.5122
H322 Chromosome	CP078110	2	37.4Kb	intact (100)	1012613-1050096	0	20	12	8	1	0	yes	PHAGE_Entero_mEp235_NC_019708	0.5833
H322 Chromosome	CP078110	3	43.5Kb	intact (150)	2593466-2636986	1	58	44	14	1	0	yes	PHAGE_Salmon_118970_sal3_NC_031940	0.5522
H322 Chromosome	CP078110	5	17.7Kb	intact (100)	2798780-2816490	0	25	16	9	1	0	no	PHAGE_Entero_P1_NC_005856	0.5523
GK1025B Chromosome	CP078106	1	52.7Kb	intact (130)	870755-923494	0	76	65	11	1	0	yes	PHAGE_Cronob_ENT47670_NC_019927	0.5051
GK1025B Chromosome	CP078106	2	27.7Kb	intact (94)	1200731-1228495	0	36	35	1	1	0	no	PHAGE_Cronob_ESSI_2_NC_047854	0.5556
GK1025B Chromosome	CP078106	3	31.1Kb	intact (150)	2000077-2031182	0	41	32	9	1	0	yes	PHAGE_Cronob_phiES15_NC_018454	0.5041
					``````
