# Supplementary material for: Complete genome sequences and genomic characterization of five plasmids harbored by environmentally persistent Cronobacter sakazakii strains ST83 H322 and ST64 GK1025B obtained from powdered infant formula manufacturing facilities
Source: Gut Pathog. 2022 Jun 6;14:23. doi: 10.1186/s13099-022-00500-5 (PMC9169379; doi:10.1186/s13099-022-00500-5)
Supplement: Supplementary file 3 — Additional file 3: Table S3. BLAST analysis of 683 Cronobacter genomes housed in a local database for the presnece of phage-plasmid pH322_1. [file 13099_2022_500_MOESM3_ESM.xlsx]

## Sheet: result-12012020
Table S3. BLAST analysis of 683 Cronobacter genomes housed in a local database for the presnece of phage-plasmid pH322_1.
Species_Strain				C.condimenti	C.condimenti	C.dublinensis	C.dublinensis	C.dublinensis	C.dublinensis	C.dublinensis	C.dublinensis	C.dublinensis	C.dublinensis	C.dublinensis	C.dublinensis	C.dublinensis	C.dublinensis	C.dublinensis	C.dublinensis	C.dublinensis	C.dublinensis	C.dublinensis	C.dublinensis	C.dublinensis	C.dublinensis	C.malonaticus	C.malonaticus	C.malonaticus	C.malonaticus	C.malonaticus	C.malonaticus	C.malonaticus	C.malonaticus	C.malonaticus	C.malonaticus	C.malonaticus	C.malonaticus	C.malonaticus	C.malonaticus	C.malonaticus	C.malonaticus	C.malonaticus	C.malonaticus	C.malonaticus	C.malonaticus	C.malonaticus	C.malonaticus	C.malonaticus	C.malonaticus
ST				-	98	7 exact matches found-ST477/576 (atpD 151, fusA 20, glnS111, gltB 90, gyrB 195, infB 212, and pps 239)	ST358/666, 6 matches (atp:112, fusA:41, glnS:43, gyrB:64, infB:130, pps:39)	ST586, 5 matches; atpD 162, fusA 20, glnS 111, gyrB 82, infB 41	ST586,7 matches; atpD 37, fusA 41, glnS 201, gltB 30, gyrB 47, infB 50, pps 109	ST725, 6 matches,atpD:30, fusA:46, glnS:231/33/223, gltB:26, gyrB:36, infB:27	2 alleles found: atpD 23, fusA 20	80	80	106	106	106	106	162	167	388	389	389	79	79	95	ST303, CC7, 6 alleles found: atpD 10, fusA 7, gltB 75, gyrB 77, infB 14, pps 48	ST303, CC7, 6 alleles found: atpD 10, fusA 7, gltB 75, gyrB 77, infB 14, pps 48	ST303, CC7, 6 alleles found: atpD 10, fusA 7, gltB 75, gyrB 77, infB 14, pps 48	ST303, CC7, 6 alleles found: atpD 10, fusA 7, gltB 75, gyrB 77, infB 14, pps 48	ST303, CC7, 6 alleles found: atpD 10, fusA 7, gltB 75, gyrB 77, infB 14, pps 48	ST303, CC7, 6 alleles found: atpD 10, fusA 7, gltB 75, gyrB 77, infB 14, pps 48	ST303, CC7, 6 alleles found: atpD 10, fusA 7, gltB 75, gyrB 77, infB 14, pps 48	ST303, CC7, 6 alleles found: atpD 10, fusA 7, gltB 75, gyrB 77, infB 14, pps 48	ST303, CC7, 6 alleles found: atpD 10, fusA 7, gltB 75, gyrB 77, infB 14, pps 48	ST303, CC7, 6 alleles found: atpD 10, fusA 7, gltB 75, gyrB 77, infB 14, pps 48	ST303, CC7, 6 alleles found: atpD 10, fusA 7, gltB 75, gyrB 77, infB 14, pps 48	ST303, CC7, 6 alleles found: atpD 10, fusA 7, gltB 75, gyrB 77, infB 14, pps 48	ST7	ST7	ST7	ST7	11	129	129	129	129	258	307	60
Strain_name				pCCO1	ccon1330	CDC-5960-70	CdubKW5	CdubSUN1	cdub3-27	cdub582	cdub6-3G	cdubd515, LMG 23824T	E798	pCDU1	cdub1210, LMG 23823T	cdub187	cdubCFS237, LMG 23823T	CDC-0743-75	cdub6-15	cdubC022296	cdubC022294	cdubComp100	cdub454	cdublauLMG23825	cdub2-14	cmalGK1349	cmalGK1354	cmalGK1355	cmalGK1356	cmalGK1357	cmalGK1358	cmalGK1360	cmalGK1510	cmalGK1512	cmalGK1518	cmalGK796	cmalGK962	p1	pCMA1	pCMA2	p2	cmal507	cmalE902	CQ41	CQ62	E829	cmalE265	cmalfda827	CmalE833
Species	Type	Plasmid	Gene
Cronobacter_condimenti	virulence_plasmid	pCCO1	AAA_family_ATPase	100	100	0	0	0	0	100	0	82.34	80.75	0	0	0	0	0	0	0	0	0	81.27	100	0	0	0	0	0	0	0	0	0	0	0	0	0	0	0	0	0	0	0	0	0	0	0	0	0
Cronobacter_condimenti	virulence_plasmid	pCCO1	ABC_transporter_ATP-binding_protein	100	100	0	0	0	0	0	0	0	0	0	0	0	0	0	0	0	0	0	0	0	0	0	0	0	0	0	0	0	0	0	0	0	0	0	0	0	0	0	0	0	0	0	0	0	0
Cronobacter_condimenti	virulence_plasmid	pCCO1	ABC_transporter_substrate-binding_protein	100	100	0	0	0	0	0	0	0	0	0	0	0	0	0	0	0	0	0	0	0	0	0	0	0	0	0	0	0	0	0	0	0	0	0	0	0	0	0	0	0	0	0	0	0	0
Cronobacter_condimenti	virulence_plasmid	pCCO1	DNA/RNA_non-specific_endonuclease	100	100	0	95.99	96.17	0	98.57	0	0	98.57	0	0	0	0	0	92.31	0	0	0	0	0	97.08	0	0	0	0	0	0	0	0	0	0	0	0	0	0	0	0	0	0	0	0	0	0	0	0
Cronobacter_condimenti	virulence_plasmid	pCCO1	DUF1330_domain-containing_protein	100	100	0	0	0	0	0	0	0	0	0	0	0	0	0	0	0	0	0	0	0	0	0	0	0	0	0	0	0	0	0	0	0	0	0	0	0	0	0	0	0	0	0	0	0	0
Cronobacter_condimenti	virulence_plasmid	pCCO1	DUF1427_family_protein	100	100	0	98.57	0	98.57	80.43	0	0	80.43	0	0	0	0	0	0	100	0	0	0	0	98.57	0	0	0	0	0	0	0	0	0	0	0	0	0	0	0	0	0	0	0	0	0	0	0	0
Cronobacter_condimenti	virulence_plasmid	pCCO1	DUF2534_family_protein	100	99.62	0	0	0	0	0	0	0	0	0	0	0	0	0	0	0	0	0	0	0	0	0	0	0	0	0	0	0	0	0	0	0	0	0	0	0	0	0	0	0	0	0	0	0	0
Cronobacter_condimenti	virulence_plasmid	pCCO1	DUF2778_domain-containing_protein	100	100	0	0	0	0	0	0	0	0	0	0	0	0	0	0	0	0	0	0	0	0	0	0	0	0	0	0	0	0	0	0	0	0	0	0	0	0	0	0	0	0	0	0	0	0
Cronobacter_condimenti	virulence_plasmid	pCCO1	DoxX_family_protein	100	100	0	100	0	0	86.01	0	0	0	0	0	0	0	0	0	0	0	0	86.05	86.05	0	0	0	0	0	0	0	0	0	0	0	0	0	0	0	0	0	0	0	0	0	0	0	0	0
Cronobacter_condimenti	virulence_plasmid	pCCO1	GNAT_family_N-acetyltransferase	100	100	0	0	0	0	0	0	0	0	0	0	0	0	0	0	0	0	0	0	0	0	0	0	0	0	0	0	0	0	0	0	0	0	0	0	0	0	0	0	0	0	0	0	0	0
Cronobacter_condimenti	virulence_plasmid	pCCO1	GntR_family_transcriptional_regulator	100	100	0	0	0	0	0	0	0	0	0	0	0	0	0	0	0	0	0	0	0	0	0	0	0	0	0	0	0	0	0	0	0	0	0	0	0	0	0	0	0	0	0	0	0	0
Cronobacter_condimenti	virulence_plasmid	pCCO1	HAMP_domain-containing_protein	100	100	0	0	0	0	0	0	0	0	0	0	0	0	0	84.11	0	0	0	0	0	0	73.59	88.78	73.59	73.59	73.59	73.59	73.59	73.59	73.59	73.59	73.59	73.59	0	0	0	0	73.59	84.62	84.62	84.62	84.62	0	0	0
Cronobacter_condimenti	virulence_plasmid	pCCO1	LacI_family_DNA-binding_transcriptional_regulator	100	99.9	0	0	0	0	0	0	0	0	0	0	0	0	0	0	0	0	0	0	0	0	0	0	0	0	0	0	0	0	0	0	0	0	0	0	0	0	0	0	0	0	0	0	0	0
Cronobacter_condimenti	virulence_plasmid	pCCO1	MBL_fold_hydrolase	100	100	0	0	0	0	0	0	0	0	0	0	0	0	0	0	0	0	0	0	0	0	0	0	0	0	0	0	0	0	0	0	0	0	0	0	0	0	0	0	0	0	0	0	0	0
Cronobacter_condimenti	virulence_plasmid	pCCO1	MFS_transporter	100	100	0	0	0	0	0	0	0	0	99.5	99.5	99.5	99.38	0	0	93.4	0	0	0	0	0	0	0	0	0	0	0	0	0	0	0	0	0	0	0	0	0	0	0	0	0	0	0	0	0
Cronobacter_condimenti	virulence_plasmid	pCCO1	MafI_family_immunity_protein	100	100	0	0	0	0	0	0	0	0	0	0	0	0	0	0	0	0	0	0	0	0	0	0	0	0	0	0	0	0	0	0	0	0	0	0	0	0	0	0	0	0	0	0	0	0
Cronobacter_condimenti	virulence_plasmid	pCCO1	MerR_family_transcriptional_regulator	100	100	0	0	0	0	0	0	0	0	0	0	0	0	0	0	0	0	0	0	0	0	0	0	0	0	0	0	0	0	0	0	0	0	0	0	0	0	0	0	0	0	0	0	0	0
Cronobacter_condimenti	virulence_plasmid	pCCO1	Mig-14_family_protein	100	100	0	98.55	0	98.22	0	0	0	0	98.44	98.44	100	98.44	0	0	0	0	0	0	0	98.66	0	0	0	0	0	0	0	0	0	0	0	0	0	0	0	0	0	0	0	0	0	0	0	0
Cronobacter_condimenti	virulence_plasmid	pCCO1	N-acetyltransferase	100	100	0	97.56	0	97.36	81.25	80.7	81.8	81.8	0	0	0	0	0	80.53	0	0	0	80.08	0	0	0	0	0	0	0	0	0	0	0	0	0	0	0	0	0	0	0	0	0	0	0	0	0	0
Cronobacter_condimenti	virulence_plasmid	pCCO1	NINE_protein	100	100	0	0	0	0	0	0	0	0	0	0	0	0	0	0	0	0	0	0	0	0	0	0	0	0	0	0	0	0	0	0	0	0	0	0	0	0	0	0	0	0	0	0	0	0
Cronobacter_condimenti	virulence_plasmid	pCCO1	NUDIX_domain-containing_protein	100	100	0	0	0	0	0	0	0	0	0	0	0	0	0	0	0	0	0	0	0	0	0	0	0	0	0	0	0	0	0	0	0	0	0	0	0	0	0	0	0	0	0	0	0	0
Cronobacter_condimenti	virulence_plasmid	pCCO1	PTS_transporter_subunit_EIIC	100	100	0	0	0	0	0	0	0	0	0	0	0	0	0	0	0	0	0	0	0	0	0	0	0	0	0	0	0	0	0	0	0	0	0	0	0	0	0	0	0	0	0	0	0	0
Cronobacter_condimenti	virulence_plasmid	pCCO1	ParB/RepB/Spo0J_family_partition_protein	100	100	0	0	0	0	0	0	0	0	0	0	0	0	0	0	0	0	0	0	0	0	0	0	0	0	0	0	0	0	0	0	0	0	0	0	0	0	0	0	0	0	0	0	0	0
Cronobacter_condimenti	virulence_plasmid	pCCO1	RepB_family_plasmid_replication_initiator_protein	100	100	0	0	0	0	0	0	0	0	0	0	0	0	0	0	0	0	0	0	0	0	0	0	0	0	0	0	0	0	0	0	0	0	0	0	0	0	0	0	0	0	0	0	0	0
Cronobacter_condimenti	virulence_plasmid	pCCO1	SDR_family_oxidoreductase	100	100	0	0	0	0	0	0	0	0	0	0	0	0	0	0	0	0	0	0	0	0	0	0	0	0	0	0	0	0	0	0	0	0	0	0	0	0	0	0	0	0	0	0	0	0
Cronobacter_condimenti	virulence_plasmid	pCCO1	SMI1/KNR4_family_protein	100	100	0	0	0	0	0	0	0	0	0	0	0	0	0	0	0	0	0	0	0	0	0	0	0	0	0	0	0	0	0	0	0	0	0	0	0	0	0	0	0	0	0	0	0	0
Cronobacter_condimenti	virulence_plasmid	pCCO1	ShlA/HecA/FhaA_protein	100	100	0	0	96.41	93.19	0	0	0	0	0	0	0	0	0	0	94.1	0	0	0	0	0	0	0	0	0	0	0	0	0	0	0	0	0	0	0	0	0	0	0	0	0	0	0	0	0
Cronobacter_condimenti	virulence_plasmid	pCCO1	ShlB/FhaC/HecB_family_hemolysin_secretion/activation_protein	100	100	0	0	0	0	0	0	99.39	0	0	0	0	0	0	0	0	0	0	0	95.66	0	0	0	0	0	0	0	0	0	0	0	0	0	0	0	0	0	0	0	0	0	0	0	0	0
Cronobacter_condimenti	virulence_plasmid	pCCO1	SidA/IucD/PvdA_family_monooxygenase	100	100	0	0	0	0	0	0	0	0	99.32	99.32	99.32	99.32	0	0	0	0	0	0	0	0	0	0	0	0	0	0	0	0	0	0	0	0	0	0	0	0	0	0	0	0	0	0	0	0
Cronobacter_condimenti	virulence_plasmid	pCCO1	Starvation_sensing_protein_RspA	100	100	0	0	0	0	0	0	0	0	0	0	0	0	0	0	0	0	0	0	0	0	0	0	0	0	0	0	0	0	0	0	0	0	0	0	0	0	0	0	0	0	0	0	0	0
Cronobacter_condimenti	virulence_plasmid	pCCO1	TetR/AcrR_family_transcriptional_regulator	100	100	0	0	0	0	0	0	0	0	0	0	0	0	0	0	0	0	0	0	0	0	0	0	0	0	0	0	0	0	0	0	0	0	0	0	0	0	0	0	0	0	0	0	0	0
Cronobacter_condimenti	virulence_plasmid	pCCO1	TonB-dependent_siderophore_receptor	100	100	0	0	0	0	0	0	0	0	0	0	0	0	0	0	0	0	0	0	0	0	0	0	0	0	0	0	0	0	0	0	0	0	0	0	0	0	0	0	0	0	0	0	0	0
Cronobacter_condimenti	virulence_plasmid	pCCO1	Trk_system_potassium_uptake_protein_TrkG	100	100	83.2	0	83.2	0	0	0	0	0	0	0	0	0	0	0	0	0	0	0	0	0	0	0	0	0	0	0	0	0	0	0	0	0	0	0	0	0	0	0	0	0	0	0	0	0
Cronobacter_condimenti	virulence_plasmid	pCCO1	VENN_motif_pre-toxin_domain-containing_protein	100	100	0	100	100	100	97.13	0	97.13	97.13	100	100	100	100	0	0	0	0	0	97.73	0	100	0	0	0	0	0	0	0	0	0	0	0	0	0	0	0	0	0	0	0	0	0	0	0	0
Cronobacter_condimenti	virulence_plasmid	pCCO1	VOC_family_protein	100	100	0	0	0	0	0	0	0	0	0	0	0	0	0	0	0	0	0	0	0	0	0	0	0	0	0	0	0	0	0	0	0	0	0	0	0	0	0	0	0	0	0	0	0	0
Cronobacter_condimenti	virulence_plasmid	pCCO1	YafY_family_transcriptional_regulator	100	100	0	0	0	0	0	0	0	0	0	0	0	0	0	0	0	0	0	0	0	0	0	0	0	0	0	0	0	0	0	0	0	0	0	0	0	0	0	0	0	0	0	0	0	0
Cronobacter_condimenti	virulence_plasmid	pCCO1	YmjA_family_protein	100	100	0	0	0	0	0	0	0	0	0	0	0	0	0	0	0	0	0	0	0	0	0	0	0	0	0	0	0	0	0	0	0	0	0	0	0	0	0	0	0	0	0	0	0	0
Cronobacter_condimenti	virulence_plasmid	pCCO1	acetyltransferase	100	100	0	0	0	0	0	0	0	0	99.58	99.58	99.58	99.58	0	0	0	0	0	0	0	0	0	0	0	0	0	0	0	0	0	0	0	0	0	0	0	0	0	0	0	0	0	0	0	0
Cronobacter_condimenti	virulence_plasmid	pCCO1	alcohol_dehydrogenase_catalytic_domain-containing_protein	100	100	0	0	0	0	0	0	0	0	0	0	0	0	0	0	0	0	0	0	0	0	0	0	0	0	0	0	0	0	0	0	0	0	0	0	0	0	0	0	0	0	0	0	0	0
Cronobacter_condimenti	virulence_plasmid	pCCO1	alpha/beta_hydrolase	100	100	0	0	0	0	0	0	0	0	0	0	0	0	0	0	0	0	0	0	0	0	0	0	0	0	0	0	0	0	0	0	0	0	0	0	0	0	0	0	0	0	0	0	0	0
Cronobacter_condimenti	virulence_plasmid	pCCO1	amidohydrolase	100	100	0	0	0	0	0	0	0	0	0	0	0	0	0	0	0	0	0	92.21	0	0	0	0	0	0	0	0	0	0	0	0	0	0	0	0	0	0	0	0	0	0	0	0	0	0
Cronobacter_condimenti	virulence_plasmid	pCCO1	antibiotic_biosynthesis_monooxygenase	100	100	0	0	0	0	0	0	0	0	0	0	0	0	0	0	0	0	0	0	0	0	0	0	0	0	0	0	0	0	0	0	0	0	0	0	0	0	0	0	0	0	0	0	0	0
Cronobacter_condimenti	virulence_plasmid	pCCO1	arginase_family_protein	100	100	0	0	0	0	0	0	0	0	0	0	0	0	0	0	0	0	0	0	0	0	0	0	0	0	0	0	0	0	0	0	0	0	0	0	0	0	0	0	0	0	0	0	0	0
Cronobacter_condimenti	virulence_plasmid	pCCO1	arsC	100	100	0	0	0	0	0	0	0	0	0	0	0	0	0	0	0	0	0	0	0	0	0	0	0	0	0	0	0	0	0	0	0	0	0	0	0	0	0	0	0	0	0	0	0	0
Cronobacter_condimenti	virulence_plasmid	pCCO1	arsenic_transporter	100	100	0	0	0	0	0	0	0	0	0	0	0	0	0	0	0	0	0	0	0	0	0	0	0	0	0	0	0	0	0	0	0	0	0	0	0	0	0	0	0	0	0	0	0	0
Cronobacter_condimenti	virulence_plasmid	pCCO1	ascB	100	100	0	0	0	0	0	0	0	0	0	0	0	0	0	0	0	0	0	0	0	0	0	0	0	0	0	0	0	0	0	0	0	0	0	0	0	0	0	0	0	0	0	0	0	0
Cronobacter_condimenti	virulence_plasmid	pCCO1	autotransporter_domain-containing_protein	100	100	0	0	0	0	0	0	0	0	0	0	0	0	0	0	0	0	0	0	0	0	0	0	0	0	0	0	0	0	0	0	0	0	0	0	0	0	0	0	0	0	0	0	0	0
Cronobacter_condimenti	virulence_plasmid	pCCO1	bglF	100	100	0	0	0	0	0	0	0	0	0	0	0	0	0	0	0	0	0	0	0	0	0	0	0	0	0	0	0	0	0	0	0	0	0	0	0	0	0	0	0	0	0	0	0	0
Cronobacter_condimenti	virulence_plasmid	pCCO1	bglG	100	100	0	0	0	0	0	0	0	0	0	0	0	0	0	0	0	0	0	0	0	0	0	0	0	0	0	0	0	0	0	0	0	0	0	0	0	0	0	0	0	0	0	0	0	0
Cronobacter_condimenti	virulence_plasmid	pCCO1	citrate:6-N-acetyl-6-N-hydroxy-L-lysine_ligase_subunit_alpha	100	100	0	0	0	0	0	0	0	0	99.83	99.83	99.83	99.83	0	0	0	0	0	0	0	0	0	0	0	0	0	0	0	0	0	0	0	0	0	0	0	0	0	0	0	0	0	0	0	0
Cronobacter_condimenti	virulence_plasmid	pCCO1	cupin_domain-containing_protein	100	100	0	0	0	0	0	0	0	0	0	0	0	0	0	0	0	0	0	0	0	0	0	0	0	0	0	0	0	0	0	0	0	0	0	0	0	0	0	0	0	0	0	0	0	0
Cronobacter_condimenti	virulence_plasmid	pCCO1	diguanylate_phosphodiesterase	100	100	0	0	0	0	0	0	0	0	0	0	0	0	0	0	0	0	0	0	0	0	0	0	0	0	0	0	0	0	0	0	0	0	0	0	0	0	0	0	0	0	0	0	0	0
Cronobacter_condimenti	virulence_plasmid	pCCO1	dsbG	100	100	0	0	0	0	0	0	0	0	0	0	0	0	0	0	0	0	0	0	0	0	0	0	0	0	0	0	0	0	0	0	0	0	0	0	0	0	0	0	0	0	0	0	0	0
Cronobacter_condimenti	virulence_plasmid	pCCO1	exc2	100	100	0	0	0	0	0	0	0	0	0	0	0	0	0	0	0	0	0	0	0	0	0	0	0	0	0	0	0	0	0	0	0	0	0	0	0	0	0	0	0	0	0	0	0	0
Cronobacter_condimenti	virulence_plasmid	pCCO1	filamentous_hemagglutinin_N-terminal_domain-containing_protein	100	99.99	96.67	0	96.89	97.14	100	97.17	95.37	95.37	0	0	0	0	0	96.77	0	96.15	96.15	95.48	95.36	96.77	0	0	0	0	0	0	0	0	0	0	0	0	0	0	0	0	0	0	0	0	0	0	0	0
Cronobacter_condimenti	virulence_plasmid	pCCO1	four-helix_bundle_copper-binding_protein	100	100	0	0	0	0	0	0	0	0	0	0	0	0	0	0	0	0	0	0	0	0	0	0	0	0	0	0	0	0	0	0	0	0	0	0	0	0	0	0	0	0	0	0	0	0
Cronobacter_condimenti	virulence_plasmid	pCCO1	glgX	100	100	0	0	0	0	0	0	0	0	0	0	0	0	0	0	0	0	0	0	0	0	0	0	0	0	0	0	0	0	0	0	0	0	0	0	0	0	0	0	0	0	0	0	0	0
Cronobacter_condimenti	virulence_plasmid	pCCO1	glycoside_hydrolase_family_88_protein	100	100	0	0	0	0	0	0	0	0	0	0	0	0	0	0	0	0	0	0	0	0	0	0	0	0	0	0	0	0	0	0	0	0	0	0	0	0	0	0	0	0	0	0	0	0
Cronobacter_condimenti	virulence_plasmid	pCCO1	helix-turn-helix_transcriptional_regulator	100	100	0	0	0	0	0	0	0	0	100	100	100	100	0	0	0	0	0	0	0	0	0	0	0	0	0	0	0	0	0	0	0	0	0	0	0	0	0	0	0	0	0	0	0	0
Cronobacter_condimenti	virulence_plasmid	pCCO1	hemagglutinin	100	100	0	86.75	0	0	93.47	0	0	93.47	87.42	87.42	87.33	0	0	91.09	0	0	0	0	0	0	0	0	0	0	0	0	0	0	0	0	0	0	0	0	0	0	0	0	0	0	0	0	0	0
Cronobacter_condimenti	virulence_plasmid	pCCO1	histidine_phosphatase_family_protein	100	100	0	95.08	0	0	0	0	0	0	0	0	0	0	0	0	0	0	0	95.77	96.11	0	0	0	0	0	0	0	0	0	0	0	0	0	0	0	0	0	0	0	0	0	0	0	0	0
Cronobacter_condimenti	virulence_plasmid	pCCO1	hydrolase	100	100	0	0	0	0	91.41	90.98	90.97	91.41	0	0	0	0	0	90.98	0	0	0	91.23	0	0	0	0	0	0	0	0	0	0	0	0	0	0	0	0	0	0	0	0	0	0	0	0	0	0
Cronobacter_condimenti	virulence_plasmid	pCCO1	hypothetical_protein	100	100	91.54	100	98.15	100	100	100	0	100	100	100	100	100	0	100	0	100	100	0	0	100	0	0	0	0	0	0	0	0	0	0	0	0	0	0	0	0	92.01	0	0	0	0	91.24	94.35	0
Cronobacter_condimenti	virulence_plasmid	pCCO1	iron_ABC_transporter_permease	100	100	0	0	0	0	0	0	0	0	0	0	0	0	0	0	0	0	0	0	0	0	0	0	0	0	0	0	0	0	0	0	0	0	0	0	0	0	0	0	0	0	0	0	0	0
Cronobacter_condimenti	virulence_plasmid	pCCO1	iucC	100	100	0	0	0	0	0	0	0	0	99.48	99.48	99.48	99.48	0	0	0	0	0	0	0	0	0	0	0	0	0	0	0	0	0	0	0	0	0	0	0	0	0	0	0	0	0	0	0	0
Cronobacter_condimenti	virulence_plasmid	pCCO1	metallophosphoesterase	100	99.87	0	0	0	0	0	0	0	0	0	0	0	0	0	0	0	0	0	0	0	0	0	0	0	0	0	0	0	0	0	0	0	0	0	0	0	0	0	0	0	0	0	0	0	0
Cronobacter_condimenti	virulence_plasmid	pCCO1	metalloregulator_ArsR/SmtB_family_transcription_factor	100	100	0	0	0	0	0	0	0	0	0	0	0	0	0	0	0	0	0	0	0	0	0	0	0	0	0	0	0	0	0	0	0	0	0	0	0	0	0	0	0	0	0	0	0	0
Cronobacter_condimenti	virulence_plasmid	pCCO1	methyl-accepting_chemotaxis_protein	100	100	92.63	93.68	93.68	93.68	93.88	93.68	93.88	93.88	0	93.68	93.68	93.68	93.68	94.74	93.68	92.63	92.63	92.63	92.63	93.68	100	100	100	100	100	100	100	100	100	100	100	100	0	0	0	0	92.63	92.63	92.63	92.63	92.63	100	100	100
Cronobacter_condimenti	virulence_plasmid	pCCO1	methyl-accepting_chemotaxis_protein_I	100	100	84.03	86.36	84.87	86.36	84.04	84.87	83.19	83.19	0	86.36	86.36	86.36	86.36	86.36	86.36	89.77	89.77	88.64	100	86.36	86.52	86.52	86.52	86.52	86.52	86.52	86.52	86.52	86.52	86.52	86.52	86.52	0	0	0	0	0	86.81	86.81	86.81	86.81	0	81.62	86.52
Cronobacter_condimenti	virulence_plasmid	pCCO1	mgtA	100	100	0	0	0	0	0	0	0	0	0	0	0	0	0	0	0	0	0	0	0	0	0	0	0	0	0	0	0	0	0	0	0	0	0	0	0	0	0	0	0	0	0	0	0	0
Cronobacter_condimenti	virulence_plasmid	pCCO1	nuclear_transport_factor_2_family_protein	100	100	0	0	0	0	0	0	0	0	0	0	0	0	0	0	0	0	0	0	0	0	0	0	0	0	0	0	0	0	0	0	0	0	0	0	0	0	0	0	0	0	0	0	0	0
Cronobacter_condimenti	virulence_plasmid	pCCO1	nuclease	100	100	0	0	0	0	0	0	0	0	0	0	0	0	0	90.69	0	0	0	0	0	0	0	0	0	0	0	0	0	0	0	0	0	0	0	0	0	0	0	0	0	0	0	0	89.12	89.12
Cronobacter_condimenti	virulence_plasmid	pCCO1	phosphoglycerate_mutase_family_protein	100	100	0	0	0	0	0	0	0	0	0	0	0	0	0	0	0	0	0	0	0	0	0	0	0	0	0	0	0	0	0	0	0	0	0	0	0	0	0	0	0	0	0	0	0	0
Cronobacter_condimenti	virulence_plasmid	pCCO1	response_regulator	100	100	0	98.94	0	98.94	0	0	0	0	98.94	98.94	98.94	98.94	0	0	99.21	0	0	0	0	98.94	0	0	0	0	0	0	0	0	0	0	0	0	0	0	0	0	0	0	0	0	0	0	0	0
Cronobacter_condimenti	virulence_plasmid	pCCO1	response_regulator_transcription_factor	100	100	0	0	0	0	0	0	0	0	0	0	0	0	0	0	0	0	0	0	0	0	0	0	0	0	0	0	0	0	0	0	0	0	0	0	0	0	0	0	0	0	0	0	0	0
Cronobacter_condimenti	virulence_plasmid	pCCO1	rhomboid_protein	100	100	0	0	0	0	0	0	0	0	0	0	0	0	0	0	0	0	0	0	0	0	0	0	0	0	0	0	0	0	0	0	0	0	0	0	0	0	0	0	0	0	0	0	0	0
Cronobacter_condimenti	virulence_plasmid	pCCO1	sensor_domain-containing_diguanylate_cyclase	100	99.94	0	0	0	0	0	0	0	0	0	0	0	0	0	0	0	0	0	0	0	0	0	0	0	0	0	0	0	0	0	0	0	0	0	0	0	0	0	0	0	0	0	0	0	0
Cronobacter_condimenti	virulence_plasmid	pCCO1	siderophore-interacting_protein	100	100	0	0	0	0	0	0	0	0	98.76	98.76	98.76	98.76	0	0	0	0	0	0	0	0	0	0	0	0	0	0	0	0	0	0	0	0	0	0	0	0	0	0	0	0	0	0	0	0
Cronobacter_condimenti	virulence_plasmid	pCCO1	tehA	100	100	0	0	0	0	0	0	0	0	0	0	0	0	0	0	0	0	0	0	0	0	0	0	0	0	0	0	0	0	0	0	0	0	0	0	0	0	0	0	0	0	0	0	0	0
Cronobacter_condimenti	virulence_plasmid	pCCO1	terminase_large_subunit	100	100	0	0	0	0	0	0	0	0	0	0	0	0	0	0	0	0	0	0	0	0	0	0	0	0	0	0	0	0	0	0	0	0	0	0	0	0	0	0	0	0	0	0	0	0
Cronobacter_condimenti	virulence_plasmid	pCCO1	thioredoxin_fold_domain-containing_protein	100	100	0	0	0	0	0	0	0	0	0	0	0	0	0	0	0	0	0	0	0	0	0	0	0	0	0	0	0	0	0	0	0	0	0	0	0	0	0	0	0	0	0	0	0	0
Cronobacter_condimenti	virulence_plasmid	pCCO1	treY	100	100	0	0	0	0	0	0	0	0	0	0	0	0	0	0	0	0	0	0	0	0	0	0	0	0	0	0	0	0	0	0	0	0	0	0	0	0	0	0	0	0	0	0	0	0
Cronobacter_condimenti	virulence_plasmid	pCCO1	treZ	100	99.94	0	0	0	0	0	0	0	0	99.66	99.66	99.66	99.66	0	0	0	0	0	0	0	0	0	0	0	0	0	0	0	0	0	0	0	0	0	0	0	0	0	0	0	0	0	0	0	0
Cronobacter_condimenti	virulence_plasmid	pCCO1	two-component-system_connector_protein_YcgZ	100	100	0	0	0	0	0	0	0	0	0	0	0	0	0	0	0	0	0	0	0	0	0	0	0	0	0	0	0	0	0	0	0	0	0	0	0	0	0	0	0	0	0	0	0	0
Cronobacter_condimenti	virulence_plasmid	pCCO1	type_II_toxin-antitoxin_system_HipA_family_toxin	100	100	0	0	0	0	0	0	0	0	99.24	99.24	99.24	99.24	0	0	0	0	0	0	0	0	0	0	0	0	0	0	0	0	0	0	0	0	0	0	0	0	0	0	0	0	0	0	0	0
Cronobacter_condimenti	virulence_plasmid	pCCO1	type_VI_secretion_system_tube_protein_Hcp	100	99.79	0	0	0	0	0	0	0	0	0	0	0	0	0	0	0	0	0	0	0	0	0	0	0	0	0	0	0	0	0	0	0	0	0	0	0	0	0	0	0	0	0	0	0	0
Cronobacter_condimenti	virulence_plasmid	pCCO1	tyrosine-type_recombinase/integrase	100	100	0	0	0	0	0	0	0	0	0	0	0	0	0	0	0	0	0	0	0	0	0	0	0	0	0	0	0	0	0	0	0	0	0	0	0	0	0	0	0	0	0	0	0	0
Cronobacter_condimenti	virulence_plasmid	pCCO1	winged_helix-turn-helix_transcriptional_regulator	100	100	0	0	0	0	0	0	0	0	0	0	0	0	0	0	0	0	0	0	0	0	0	0	0	0	0	0	0	0	0	0	0	0	0	0	0	0	0	0	0	0	0	0	0	0
Cronobacter_dublinensis	virulence_plasmid	pCDU1	3',5'-cyclic-nucleotide_phosphodiesterase	0	0	97.44	99.07	94.13	99.07	93.73	93.33	93.61	93.73	100	100	100	100	0	93.6	99.2	93.87	93.87	93.16	94.34	99.07	0	0	0	0	0	0	0	0	0	0	0	0	0	0	0	0	0	0	0	0	0	0	0	0
Cronobacter_dublinensis	virulence_plasmid	pCDU1	AAA_family_ATPase	0	0	98.31	100	97.67	100	100	100	100	100	100	100	100	100	0	100	100	98.18	98.18	100	100	100	0	0	0	0	0	0	0	0	0	0	0	0	0	0	0	0	0	0	0	0	0	0	0	0
Cronobacter_dublinensis	virulence_plasmid	pCDU1	ABC_transporter_ATP-binding_protein	0	0	97.89	100	97.89	98.55	96.44	97.23	0	96.44	100	100	100	100	0	97.63	99.08	97.89	97.89	98.09	0	98.16	0	0	0	0	0	0	0	0	0	0	0	0	0	0	0	0	0	0	0	0	0	0	0	0
Cronobacter_dublinensis	virulence_plasmid	pCDU1	ABC_transporter_substrate-binding_protein	0	0	98.09	99.4	98.39	99	98.19	98.09	0	98.19	100	100	100	100	0	97.89	98.9	98.39	98.39	97.92	96.61	98.8	0	0	0	0	0	0	0	0	0	0	0	0	0	0	0	0	0	0	0	0	0	0	0	0
Cronobacter_dublinensis	virulence_plasmid	pCDU1	ATPase_AAA	0	0	97.97	99.15	97.46	99.41	97.04	96.95	0	97.04	100	99.92	100	100	0	97.55	98.73	97.55	100	98.83	0	99.41	0	0	0	0	0	0	0	0	0	0	0	0	0	0	0	0	0	0	0	0	0	0	0	0
Cronobacter_dublinensis	virulence_plasmid	pCDU1	CpmJ_protein	0	0	0	99.26	0	99.26	0	0	0	0	100	100	100	100	0	0	99.45	0	0	0	0	98.71	0	0	0	0	0	0	0	0	0	0	0	0	0	0	0	0	0	0	0	0	0	0	0	0
Cronobacter_dublinensis	virulence_plasmid	pCDU1	CpmK_protein	0	0	0	99.63	0	99.63	0	0	0	0	100	100	100	100	0	0	99.24	0	0	0	0	99.45	0	0	0	0	0	0	0	0	0	0	0	0	0	0	0	0	0	0	0	0	0	0	0	0
Cronobacter_dublinensis	virulence_plasmid	pCDU1	DMT_family_transporter	0	0	98.29	98.98	98.41	99.32	98.86	98.63	0	98.86	100	99.89	100	100	0	98.18	99.43	98.63	98.63	98.63	98.63	99.2	0	0	0	0	0	0	0	0	0	0	0	0	0	0	0	0	0	0	0	0	0	0	0	0
Cronobacter_dublinensis	virulence_plasmid	pCDU1	DUF1427_family_protein	0	0	0	100	0	100	0	0	0	0	100	100	100	100	0	0	100	0	0	0	0	100	0	0	0	0	0	0	0	0	0	0	0	0	0	0	0	0	0	0	0	0	0	0	0	0
Cronobacter_dublinensis	virulence_plasmid	pCDU1	DUF2235_domain-containing_protein	0	0	100	0	0	0	94.74	0	0	94.74	100	100	100	100	0	0	0	0	0	0	0	100	0	0	0	0	0	0	0	0	0	0	0	0	0	0	0	0	0	0	0	0	0	0	0	0
Cronobacter_dublinensis	virulence_plasmid	pCDU1	DUF2534_family_protein	0	0	98.85	98.85	98.85	98.85	99.23	98.08	0	99.23	100	100	100	100	0	99.23	99.23	98.85	98.85	98.47	100	98.85	0	0	0	0	0	0	0	0	0	0	0	0	0	0	0	0	0	0	0	0	0	0	0	0
Cronobacter_dublinensis	virulence_plasmid	pCDU1	DUF2931_family_protein	0	0	100	0	0	0	91.5	0	0	91.5	100	100	100	100	0	0	0	0	0	0	0	100	0	0	0	0	0	0	0	0	0	0	0	0	0	0	0	0	0	0	0	0	0	0	0	0
Cronobacter_dublinensis	virulence_plasmid	pCDU1	DUF4279_domain-containing_protein	0	0	0	97.04	98.02	100	97.78	0	0	97.78	100	100	100	0	0	0	0	0	0	96.3	0	97.78	0	0	0	0	0	0	0	0	0	0	0	0	0	0	0	0	0	0	0	0	0	0	0	0
Cronobacter_dublinensis	virulence_plasmid	pCDU1	DotU_family_type_IV/VI_secretion_system_protein	0	0	97.55	0	0	0	100	0	0	98.01	100	99.85	100	100	0	0	98.78	0	0	0	0	98.78	0	0	0	0	0	0	0	0	0	0	0	0	0	0	0	0	0	0	0	0	0	0	0	0
Cronobacter_dublinensis	virulence_plasmid	pCDU1	DoxX_family_protein	0	0	0	100	0	99.77	85.78	0	0	0	100	100	100	100	0	0	96.97	0	0	86.01	86.01	99.77	0	0	0	0	0	0	0	0	0	0	0	0	0	0	0	0	0	0	0	0	0	0	0	0
Cronobacter_dublinensis	virulence_plasmid	pCDU1	GNAT_family_N-acetyltransferase	0	0	100	100	97.19	100	100	100	0	100	100	100	100	100	0	100	100	96.44	96.44	100	97	100	0	0	0	0	0	0	0	0	0	0	0	0	0	0	0	0	0	0	0	0	0	0	0	0
Cronobacter_dublinensis	virulence_plasmid	pCDU1	GntR_family_transcriptional_regulator	0	0	96.94	99.17	97.64	98.89	97.78	96.81	0	97.78	100	100	100	100	0	96.53	98.61	97.78	97.78	97.91	0	98.89	0	0	0	0	0	0	0	0	0	0	0	0	0	0	0	0	0	0	0	0	0	0	0	0
Cronobacter_dublinensis	virulence_plasmid	pCDU1	HAMP_domain-containing_protein	0	83.87	100	100	97.5	100	100	100	100	100	100	100	100	100	95.59	100	100	100	100	100	100	100	0	78.16	0	0	0	0	0	0	0	0	0	0	0	0	0	0	84.83	0	0	0	0	100	100	100
Cronobacter_dublinensis	virulence_plasmid	pCDU1	Hcp_family_type_VI_secretion_system_effector	0	85.42	98.98	0	0	0	100	0	98.58	98.58	100	100	100	100	0	0	99.19	0	0	0	0	100	0	0	0	0	0	0	0	0	0	0	0	0	0	0	0	0	0	0	0	0	0	0	0	0
Cronobacter_dublinensis	virulence_plasmid	pCDU1	LysR_family_transcriptional_regulator	0	0	100	100	100	100	100	100	0	98.44	100	100	100	100	0	98.22	100	100	100	100	100	100	0	0	0	0	0	0	0	0	0	0	0	0	0	0	0	0	0	0	0	0	0	0	0	0
Cronobacter_dublinensis	virulence_plasmid	pCDU1	MFS_transporter	99.5	99.5	100	100	100	100	100	100	100	100	100	100	100	100	0	100	100	100	100	100	100	100	0	0	0	0	0	0	0	0	0	0	0	0	0	0	0	0	0	0	0	0	0	0	0	0
Cronobacter_dublinensis	virulence_plasmid	pCDU1	MafI_family_immunity_protein	0	0	0	97.35	96.97	100	96.21	0	0	96.21	100	100	100	0	0	0	0	0	0	97.35	0	96.97	0	0	0	0	0	0	0	0	0	0	0	0	0	0	0	0	0	0	0	0	0	0	0	0
Cronobacter_dublinensis	virulence_plasmid	pCDU1	MerR_family_transcriptional_regulator	0	0	95.56	100	95.43	99.19	100	95.97	0	95.97	100	100	100	100	0	96.64	98.92	95.97	95.97	95.97	95.97	99.19	0	0	0	0	0	0	0	0	0	0	0	0	0	0	0	0	0	0	0	0	0	0	0	0
Cronobacter_dublinensis	virulence_plasmid	pCDU1	MipA/OmpV_family_protein	0	0	97.44	100	97.44	100	97.69	97.18	0	97.69	100	100	100	100	0	97.82	98.46	0	97.82	96.79	96.81	100	0	0	0	0	0	0	0	0	0	0	0	0	0	0	0	0	0	0	0	0	0	0	0	0
Cronobacter_dublinensis	virulence_plasmid	pCDU1	N-acetyltransferase	0	0	0	98.98	0	98.78	80.77	80.29	81.11	81.11	100	100	100	100	0	80.12	0	0	0	79.67	0	99.19	0	0	0	0	0	0	0	0	0	0	0	0	0	0	0	0	0	0	0	0	0	0	0	0
Cronobacter_dublinensis	virulence_plasmid	pCDU1	NINE_protein	0	0	98.63	100	98.29	100	98.29	98.29	0	98.29	100	100	100	100	0	98.29	0	99.32	99.32	98.29	98.29	100	0	0	0	0	0	0	0	0	0	0	0	0	0	0	0	0	0	0	0	0	0	0	0	0
Cronobacter_dublinensis	virulence_plasmid	pCDU1	NUDIX_domain-containing_protein	0	0	96.76	99.41	96.77	99.1	100	97.03	97.06	97.26	100	100	100	100	0	97.03	98.42	96.3	96.3	0	0	98.2	0	0	0	0	0	0	0	0	0	0	0	0	0	0	0	0	0	0	0	0	0	0	0	0
Cronobacter_dublinensis	virulence_plasmid	pCDU1	OmpA_family_protein	0	0	100	100	95.49	92.54	100	0	100	100	100	100	100	100	92.54	93.15	100	0	0	0	0	100	0	0	0	0	0	0	0	0	0	0	0	0	0	0	0	0	0	0	0	0	0	0	0	0
Cronobacter_dublinensis	virulence_plasmid	pCDU1	PAAR_domain-containing_protein	0	0	97.38	0	0	0	97.38	0	0	97.38	100	100	100	0	0	0	0	0	0	0	0	97.75	0	0	0	0	0	0	0	0	0	0	0	0	0	0	0	0	0	0	0	0	0	0	0	0
Cronobacter_dublinensis	virulence_plasmid	pCDU1	PLP-dependent_aminotransferase_family_protein	0	0	98.43	99.4	98.35	99.18	100	96.78	0	97.15	100	100	100	100	0	97.38	98.8	98.35	98.46	100	96	98.95	0	0	0	0	0	0	0	0	0	0	0	0	0	0	0	0	0	0	0	0	0	0	0	0
Cronobacter_dublinensis	virulence_plasmid	pCDU1	PTS_transporter_subunit_EIIC	0	0	98.26	99.42	97.97	99.49	100	97.97	98.21	98.04	100	100	100	100	0	98.26	98.78	97.89	97.89	100	97.86	99.49	0	0	0	0	0	0	0	0	0	0	0	0	0	0	0	0	0	0	0	0	0	0	0	0
Cronobacter_dublinensis	virulence_plasmid	pCDU1	ParA_family_protein	0	0	98.42	99.42	98.25	99.08	98.17	98.33	99.26	98.17	100	100	100	100	0	98.25	98.75	98.5	98.5	98.67	98.66	99.08	0	0	0	0	0	0	0	0	0	0	0	0	0	0	0	0	0	0	0	0	0	0	0	0
Cronobacter_dublinensis	virulence_plasmid	pCDU1	ParB/RepB/Spo0J_family_partition_protein	0	0	95.26	97.73	95.36	97.42	96.08	94.95	0	96.08	100	100	100	100	0	95.67	96.19	95.57	95.57	95.77	95.77	97.42	0	0	0	0	0	0	0	0	0	0	0	0	0	0	0	0	0	0	0	0	0	0	0	0
Cronobacter_dublinensis	virulence_plasmid	pCDU1	RNA_polymerase_sigma_factor	0	0	98.26	99.61	98.45	99.22	98.06	98.26	0	98.06	100	100	100	100	0	98.45	0	98	97.87	100	0	99.22	0	0	0	0	0	0	0	0	0	0	0	0	0	0	0	0	0	0	0	0	0	0	0	0
Cronobacter_dublinensis	virulence_plasmid	pCDU1	RepB_family_plasmid_replication_initiator_protein	0	0	97.63	98.48	97.54	97.92	100	96.59	97.49	97.35	100	100	100	100	0	97.06	97.53	97.14	97.25	100	96.3	97.92	0	0	0	0	0	0	0	0	0	0	0	0	0	0	0	0	0	0	0	0	0	0	0	0
Cronobacter_dublinensis	virulence_plasmid	pCDU1	SDR_family_NAD(P)-dependent_oxidoreductase	0	0	0	99.06	0	99.33	98.46	100	0	98.46	100	100	100	100	0	100	98.8	0	96.92	0	0	99.33	0	0	0	0	0	0	0	0	0	0	0	0	0	0	0	0	0	0	0	0	0	0	0	0
Cronobacter_dublinensis	virulence_plasmid	pCDU1	SDR_family_oxidoreductase	0	0	0	99.56	0	99.85	0	0	0	0	100	100	100	100	0	0	0	0	0	0	0	99.41	0	0	0	0	0	0	0	0	0	0	0	0	0	0	0	0	0	0	0	0	0	0	0	0
Cronobacter_dublinensis	virulence_plasmid	pCDU1	ShlB/FhaC/HecB_family_hemolysin_secretion/activation_protein	0	0	97.72	98.81	97	98.68	97.3	97.18	100	97.3	100	100	100	100	0	96.64	98.2	97.36	97.36	100	96.85	98.68	0	0	0	0	0	0	0	0	0	0	0	0	0	0	0	0	0	0	0	0	0	0	0	0
Cronobacter_dublinensis	virulence_plasmid	pCDU1	SidA/IucD/PvdA_family_monooxygenase	99.32	99.32	0	0	0	0	0	0	0	0	100	100	100	100	0	0	0	0	0	0	0	0	0	0	0	0	0	0	0	0	0	0	0	0	0	0	0	0	0	0	0	0	0	0	0	0
Cronobacter_dublinensis	virulence_plasmid	pCDU1	Starvation_sensing_protein_RspA	0	0	97.5	99.25	98	99.58	100	98	0	97.58	100	100	100	100	0	98.17	99.08	97.75	97.75	98.31	0	99.5	0	0	0	0	0	0	0	0	0	0	0	0	0	0	0	0	0	0	0	0	0	0	0	0
Cronobacter_dublinensis	virulence_plasmid	pCDU1	TetR/AcrR_family_transcriptional_regulator	0	0	100	97.52	0	97.52	100	100	96.62	100	100	100	100	100	0	100	100	100	100	100	0	97.87	0	0	0	0	0	0	0	0	0	0	0	0	0	0	0	0	0	0	0	0	0	0	0	0
Cronobacter_dublinensis	virulence_plasmid	pCDU1	TetR_family_transcriptional_regulator	0	0	97.58	100	97.58	100	97.13	96.55	0	97.13	100	100	100	100	0	97.31	98.57	97.41	97.41	97.93	97.93	100	0	0	0	0	0	0	0	0	0	0	0	0	0	0	0	0	0	0	0	0	0	0	0	0
Cronobacter_dublinensis	virulence_plasmid	pCDU1	TonB-dependent_siderophore_receptor	0	0	0	89.48	89.8	89.66	89.39	89.39	0	89.39	100	100	100	100	0	89.57	89.34	0	0	88.84	88.97	89.66	0	0	0	0	0	0	0	0	0	0	0	0	0	0	0	0	0	0	0	0	0	0	0	0
Cronobacter_dublinensis	virulence_plasmid	pCDU1	VENN_motif_pre-toxin_domain-containing_protein	100	100	0	100	91.62	100	91.1	0	91.1	0	100	100	100	100	0	0	0	0	0	100	0	100	0	0	0	0	0	0	0	0	0	0	0	0	0	0	0	0	0	0	0	0	0	0	0	0
Cronobacter_dublinensis	virulence_plasmid	pCDU1	WYL_domain-containing_protein	0	0	98.73	99.58	98.62	99.26	0	98.3	0	0	100	99.89	100	100	0	0	0	98.81	98.2	98.41	98.01	99.47	80.46	80.46	80.46	80.46	80.46	80.46	80.46	80.46	80.46	80.46	80.46	80.46	0	0	0	0	0	80.46	80.46	80.46	80.46	0	80.57	80.36
Cronobacter_dublinensis	virulence_plasmid	pCDU1	YafY_family_transcriptional_regulator	0	0	91.68	98.28	91.81	98.28	92.53	91.95	92.53	92.53	100	100	100	100	0	92.67	97.53	92.82	92.96	93.1	93.1	98.71	0	0	0	0	0	0	0	0	0	0	0	0	0	0	0	0	0	0	0	0	0	0	0	0
Cronobacter_dublinensis	virulence_plasmid	pCDU1	YceI_family_protein	0	0	96.65	99.12	97.18	99.47	95.94	96.83	0	95.94	100	99.82	100	100	0	94.89	98.41	96.65	96.65	95.77	95.38	99.47	0	0	0	0	0	0	0	0	0	0	0	0	0	0	0	0	0	0	0	0	0	0	0	0
Cronobacter_dublinensis	virulence_plasmid	pCDU1	YmjA_family_protein	0	0	99.19	99.59	99.19	98.78	98.37	98.78	0	98.37	100	100	100	100	0	97.56	98.37	98.37	98.37	99.1	0	98.37	0	0	0	0	0	0	0	0	0	0	0	0	0	0	0	0	0	0	0	0	0	0	0	0
Cronobacter_dublinensis	virulence_plasmid	pCDU1	acetyltransferase	99.58	99.58	0	0	0	0	0	0	0	0	100	100	100	100	0	0	0	0	0	0	0	0	0	0	0	0	0	0	0	0	0	0	0	0	0	0	0	0	0	0	0	0	0	0	0	0
Cronobacter_dublinensis	virulence_plasmid	pCDU1	acyltransferase	0	0	0	99.44	0	99.28	90.19	97.24	0	90.19	100	100	99.95	99.95	0	90.44	98.61	97.16	97.19	97.19	100	99.44	0	0	0	0	0	0	0	0	0	0	0	0	0	0	0	0	0	0	0	0	0	0	0	0
Cronobacter_dublinensis	virulence_plasmid	pCDU1	adhesin	0	0	0	0	97.5	0	97	0	0	97	100	100	100	0	0	0	0	0	0	0	0	100	0	0	0	0	0	0	0	0	0	0	0	0	0	0	0	0	0	0	0	0	0	0	0	0
Cronobacter_dublinensis	virulence_plasmid	pCDU1	alpha/beta_hydrolase	0	0	0	100	0	100	0	0	0	0	100	100	100	100	0	0	97.8	0	0	0	0	100	0	0	0	0	0	0	0	0	0	0	0	0	0	0	0	0	0	0	0	0	0	0	0	0
Cronobacter_dublinensis	virulence_plasmid	pCDU1	amidohydrolase	0	0	0	97.92	0	98.13	100	91.15	87.76	91.36	100	100	100	100	0	91.2	97.49	0	0	100	92.35	98.13	0	0	0	0	0	0	0	0	0	0	0	0	0	0	0	0	0	0	0	0	0	0	0	0
Cronobacter_dublinensis	virulence_plasmid	pCDU1	amino_acid-binding_protein	0	0	94.76	98.5	95.26	99	0	0	0	0	100	100	100	100	0	0	0	94.76	94.76	94.76	94.76	99	0	0	0	0	0	0	0	0	0	0	0	0	0	0	0	0	0	0	0	0	0	0	0	0
Cronobacter_dublinensis	virulence_plasmid	pCDU1	antibiotic_biosynthesis_monooxygenase	0	0	98.46	98.77	98.46	99.69	0	0	0	0	100	100	100	100	0	0	0	98.15	98.15	98.46	98.46	99.69	0	0	0	0	0	0	0	0	0	0	0	0	0	0	0	0	0	0	0	0	0	0	0	0
Cronobacter_dublinensis	virulence_plasmid	pCDU1	ascB	0	73.3	97.92	99.21	97.84	99.07	97.52	97.84	97.49	97.63	100	100	100	100	0	97.49	98.71	97.77	97.77	0	0	99.57	75	75	75	75	75	75	75	75	75	75	75	75	0	0	0	0	75	75	75	75	75	75	75	0
Cronobacter_dublinensis	virulence_plasmid	pCDU1	autotransporter_domain-containing_protein	0	0	100	99.92	100	99.52	100	95.76	98.07	97.31	100	100	100	100	0	96.85	100	100	100	100	100	99.52	0	0	0	0	0	0	0	0	0	0	0	0	0	0	0	0	0	0	0	0	0	0	0	0
Cronobacter_dublinensis	virulence_plasmid	pCDU1	bglF	0	0	97.53	100	97.69	98.19	100	97.58	100	97.74	100	100	100	100	0	97.69	98.76	97.15	97.15	100	0	99.46	0	0	0	0	0	0	0	0	0	0	0	0	0	0	0	0	0	0	0	0	0	0	0	0
Cronobacter_dublinensis	virulence_plasmid	pCDU1	bglG	0	0	97.6	98.92	97.6	98.56	97.84	97.96	98.4	97.84	100	100	100	100	0	97.72	99.04	98.44	98.44	98.2	98.2	98.56	0	0	0	0	0	0	0	0	0	0	0	0	0	0	0	0	0	0	0	0	0	0	0	0
Cronobacter_dublinensis	virulence_plasmid	pCDU1	citrate:6-N-acetyl-6-N-hydroxy-L-lysine_ligase_subunit_alpha	99.83	99.83	0	0	0	0	0	0	0	0	100	100	100	100	0	0	0	0	0	0	0	0	0	0	0	0	0	0	0	0	0	0	0	0	0	0	0	0	0	0	0	0	0	0	0	0
Cronobacter_dublinensis	virulence_plasmid	pCDU1	cupin_domain-containing_protein	0	0	98.4	100	98.48	99.11	98.31	97.86	98.72	98.31	100	100	100	100	0	98.75	99.2	98.13	98.13	100	98.95	99.29	0	0	0	0	0	0	0	0	0	0	0	0	0	0	0	0	0	0	0	0	0	0	0	0
Cronobacter_dublinensis	virulence_plasmid	pCDU1	cytochrome_b	0	0	99.16	98.99	98.48	99.66	100	98.99	0	97.31	100	100	100	100	0	99.16	98.82	99.49	99.49	98.82	100	99.66	0	0	0	0	0	0	0	0	0	0	0	0	0	0	0	0	0	0	0	0	0	0	0	0
Cronobacter_dublinensis	virulence_plasmid	pCDU1	cytosolic_protein	0	0	0	99.41	95.49	0	0	0	0	0	100	100	100	0	0	0	0	0	0	0	0	98.82	0	0	0	0	0	0	0	0	0	0	0	0	0	0	0	0	0	0	0	0	0	0	0	0
Cronobacter_dublinensis	virulence_plasmid	pCDU1	darcynin	0	0	0	95.37	0	0	93.52	0	0	93.52	100	100	100	100	0	94.75	94.14	93.83	0	94.44	94.44	0	0	0	0	0	0	0	0	0	0	0	0	0	0	0	0	0	0	0	0	0	0	0	0	0
Cronobacter_dublinensis	virulence_plasmid	pCDU1	diguanylate_cyclase	0	0	97.14	99.59	97.14	99.59	97.14	96.11	0	97.14	100	100	100	100	0	97.14	98.36	96.32	96.32	0	0	99.18	0	0	0	0	0	0	0	0	0	0	0	0	0	0	0	0	0	0	0	0	0	0	0	0
Cronobacter_dublinensis	virulence_plasmid	pCDU1	diguanylate_phosphodiesterase	0	0	98.52	99.67	98.6	99.18	100	98.11	0	97.7	100	100	100	100	0	97.95	99.26	98.19	98.19	97.91	97.78	99.18	0	0	0	0	0	0	0	0	0	0	0	0	0	0	0	0	0	0	0	0	0	0	0	0
Cronobacter_dublinensis	virulence_plasmid	pCDU1	dihydrodipicolinate_synthase_family_protein	0	0	97.52	99.33	97.07	98.99	100	96.96	0	97.07	100	100	100	100	0	97.07	98.08	97.19	96.74	100	0	99.1	0	0	0	0	0	0	0	0	0	0	0	0	0	0	0	0	0	0	0	0	0	0	0	0
Cronobacter_dublinensis	virulence_plasmid	pCDU1	drug:proton_antiporter	0	0	97.66	99.74	96.88	100	100	97.14	99.21	98.18	100	100	100	100	0	98.7	99.74	97.62	97.14	97.14	97.14	100	0	0	0	0	0	0	0	0	0	0	0	0	0	0	0	0	0	0	0	0	0	0	0	0
Cronobacter_dublinensis	virulence_plasmid	pCDU1	dsbG	0	0	97.49	97.75	97.22	97.35	97.35	97.35	0	97.35	100	100	100	100	0	98.02	97.22	97.09	96.97	97.09	97.09	97.75	0	0	0	0	0	0	0	0	0	0	0	0	0	0	0	0	0	0	0	0	0	0	0	0
Cronobacter_dublinensis	virulence_plasmid	pCDU1	efflux_RND_transporter_periplasmic_adaptor_subunit	0	0	97.05	100	96.79	100	100	96.61	96.9	97.05	100	100	100	100	0	96.7	98.7	96.61	97.64	0	0	100	0	0	0	0	0	0	0	0	0	0	0	0	0	0	0	0	0	0	0	0	0	0	0	0
Cronobacter_dublinensis	virulence_plasmid	pCDU1	efflux_RND_transporter_permease_subunit	0	0	97.64	100	97.54	99.38	100	97.41	97.15	97.64	100	100	100	100	0	97.67	98.66	97.81	97.77	0	0	98.76	0	0	0	0	0	0	0	0	0	0	0	0	0	0	0	0	0	0	0	0	0	0	0	0
Cronobacter_dublinensis	virulence_plasmid	pCDU1	exc2	0	0	0	99.5	0	99.5	0	0	0	0	100	100	100	100	0	0	99.75	0	0	0	0	99.5	0	0	0	0	0	0	0	0	0	0	0	0	0	0	0	0	0	0	0	0	0	0	0	0
Cronobacter_dublinensis	virulence_plasmid	pCDU1	filamentous_hemagglutinin_N-terminal_domain-containing_protein	95.63	95.63	100	100	100	100	100	100	100	100	100	100	100	100	0	100	100	100	100	100	100	100	0	0	0	0	0	0	0	0	0	0	0	0	0	0	0	0	0	0	0	0	0	0	0	0
Cronobacter_dublinensis	virulence_plasmid	pCDU1	glgX	0	0	98.46	99.61	98.65	99.66	100	98.17	98.13	98.27	100	100	100	100	0	98.17	99.18	98.36	98.36	98.36	98.36	99.47	0	0	0	0	0	0	0	0	0	0	0	0	0	0	0	0	0	0	0	0	0	0	0	0
Cronobacter_dublinensis	virulence_plasmid	pCDU1	glutathione_S-transferase_family_protein	0	0	96.48	98.66	96.98	98.99	95.48	94.97	95.4	95.48	100	100	100	100	0	94.3	97.65	95.48	95.48	94.3	94.3	98.99	0	0	0	0	0	0	0	0	0	0	0	0	0	0	0	0	0	0	0	0	0	0	0	0
Cronobacter_dublinensis	virulence_plasmid	pCDU1	glyoxalase	0	0	96.9	99.22	96.9	97.42	96.9	95.87	0	96.9	100	100	100	100	0	96.9	97.16	95.87	95.87	96.9	96.9	99.74	0	0	0	0	0	0	0	0	0	0	0	0	0	0	0	0	0	0	0	0	0	0	0	0
Cronobacter_dublinensis	virulence_plasmid	pCDU1	helix-turn-helix_transcriptional_regulator	100	100	100	100	100	100	0	98.22	0	0	100	100	100	100	0	0	98.72	100	100	100	0	100	0	0	0	0	0	0	0	0	0	0	0	0	0	0	0	0	0	0	0	0	0	0	0	0
Cronobacter_dublinensis	virulence_plasmid	pCDU1	histidine_phosphatase_family_protein	0	0	100	100	100	100	100	100	0	100	100	100	100	100	0	100	96.11	100	100	100	100	100	0	0	0	0	0	0	0	0	0	0	0	0	0	0	0	0	0	0	0	0	0	0	0	0
Cronobacter_dublinensis	virulence_plasmid	pCDU1	hydrolase	0	0	0	98.69	0	98.25	91.56	91.12	91.31	91.56	100	100	100	100	0	91.12	98.11	0	0	91.38	0	98.25	0	0	0	0	0	0	0	0	0	0	0	0	0	0	0	0	0	0	0	0	0	0	0	0
Cronobacter_dublinensis	virulence_plasmid	pCDU1	hypothetical_protein_1059	0	0	97.36	98.49	97.07	98.49	97.17	97.26	0	97.17	100	100	100	100	0	96.88	98.58	97.26	97.26	97.17	97.17	99.06	0	0	0	0	0	0	0	0	0	0	0	0	0	0	0	0	0	0	0	0	0	0	0	0
Cronobacter_dublinensis	virulence_plasmid	pCDU1	hypothetical_protein_1413	0	0	98.44	99.36	98.66	99.29	0	98.58	0	0	100	100	100	100	0	0	0	98.58	98.58	98.16	98.16	99.5	0	0	0	0	0	0	0	0	0	0	0	0	0	0	0	0	0	0	0	0	0	0	0	0
Cronobacter_dublinensis	virulence_plasmid	pCDU1	hypothetical_protein_144	0	0	0	100	0	0	91.82	0	0	91.55	100	100	100	0	0	0	0	0	0	0	0	0	0	0	0	0	0	0	0	0	0	0	0	0	0	0	0	0	0	0	0	0	0	0	0	0
Cronobacter_dublinensis	virulence_plasmid	pCDU1	hypothetical_protein_1452	0	0	96.28	98.9	96.74	99.31	100	96.69	0	96.76	100	99.93	100	100	0	96.56	98.55	97.52	97.52	100	97.65	99.24	0	0	0	0	0	0	0	0	0	0	0	0	0	0	0	0	0	0	0	0	0	0	0	0
Cronobacter_dublinensis	virulence_plasmid	pCDU1	hypothetical_protein_156	100	100	0	100	0	0	0	0	0	0	100	100	0	100	0	0	0	0	0	0	0	100	0	0	0	0	0	0	0	0	0	0	0	0	0	0	0	0	0	0	0	0	0	0	0	0
Cronobacter_dublinensis	virulence_plasmid	pCDU1	hypothetical_protein_267	0	0	0	0	97.71	0	97.75	0	0	97.75	100	100	100	0	0	0	0	0	0	0	0	100	0	0	0	0	0	0	0	0	0	0	0	0	0	0	0	0	0	0	0	0	0	0	89.3	0
Cronobacter_dublinensis	virulence_plasmid	pCDU1	hypothetical_protein_300	0	0	95	99.67	95	99.67	96	94.33	0	96	100	100	100	100	0	95.33	97.04	95.33	95.33	94.52	0	99.67	0	0	0	0	0	0	0	0	0	0	0	0	0	0	0	0	0	0	0	0	0	0	0	0
Cronobacter_dublinensis	virulence_plasmid	pCDU1	hypothetical_protein_309	100	100	0	100	0	0	0	0	0	0	100	100	0	0	0	0	0	0	0	0	0	100	0	0	0	0	0	0	0	0	0	0	0	0	0	0	0	0	0	0	0	0	0	0	0	0
Cronobacter_dublinensis	virulence_plasmid	pCDU1	hypothetical_protein_312	0	0	97.76	98.08	96.57	98.08	97.44	97.76	97.44	97.44	100	100	100	100	0	97.44	97.44	97.76	97.76	97.2	97.19	98.08	0	0	0	0	0	0	0	0	0	0	0	0	0	0	0	0	0	0	0	0	0	0	0	0
Cronobacter_dublinensis	virulence_plasmid	pCDU1	hypothetical_protein_3207	0	0	98.6	99.06	98.63	99.13	0	97.88	0	0	100	100	100	100	0	0	0	98.5	98.5	97.88	100	99.41	79.22	79.22	79.22	79.22	79.22	79.22	79.22	79.22	79.22	79.22	79.22	79.22	0	0	0	0	0	79.38	79.35	79.35	79.38	0	79.17	79.19
Cronobacter_dublinensis	virulence_plasmid	pCDU1	hypothetical_protein_336	99.07	99.07	0	95.08	97.62	0	97.02	97.62	0	97.02	100	100	100	100	0	95.37	0	0	0	0	0	100	0	0	0	0	0	0	0	0	0	0	0	0	0	0	0	0	0	0	0	0	0	0	0	0
Cronobacter_dublinensis	virulence_plasmid	pCDU1	hypothetical_protein_354	99.44	99.44	90.91	96.89	0	0	92.61	91.76	0	92.61	100	100	100	0	0	92.9	0	94.29	93.47	0	0	96.05	0	0	0	0	0	0	0	0	0	0	0	0	0	0	0	0	0	0	0	0	0	0	0	0
Cronobacter_dublinensis	virulence_plasmid	pCDU1	hypothetical_protein_372	0	0	0	95.7	0	0	0	0	0	0	100	99.73	100	0	0	0	0	0	0	0	0	0	0	0	0	0	0	0	0	0	0	0	0	0	0	0	0	0	0	0	0	0	0	0	0	0
Cronobacter_dublinensis	virulence_plasmid	pCDU1	hypothetical_protein_396	0	0	0	99.24	0	99.24	0	0	0	0	100	100	100	0	0	0	0	0	0	0	0	0	0	0	0	0	0	0	0	0	0	0	0	0	0	0	0	0	0	0	0	0	0	0	0	0
Cronobacter_dublinensis	virulence_plasmid	pCDU1	hypothetical_protein_420	0	0	98.33	99.29	97.62	99.29	97.62	97.62	97.62	97.62	100	100	100	100	0	97.86	98.81	97.62	97.62	97.14	97.14	99.29	0	0	0	0	0	0	0	0	0	0	0	0	0	0	0	0	0	0	0	0	0	0	0	0
Cronobacter_dublinensis	virulence_plasmid	pCDU1	hypothetical_protein_540	0	0	0	99.81	0	0	0	0	0	0	100	100	100	0	0	0	0	0	0	90.57	0	99.81	0	0	0	0	0	0	0	0	0	0	0	0	0	0	0	0	0	0	0	0	0	0	0	0
Cronobacter_dublinensis	virulence_plasmid	pCDU1	hypothetical_protein_804	0	0	96.14	98.13	95.9	98.01	96.27	95.9	0	96.27	100	100	100	100	0	96.39	0	96.02	96.02	95.52	95.52	98.01	0	0	0	0	0	0	0	0	0	0	0	0	0	0	0	0	0	0	0	0	0	0	0	0
Cronobacter_dublinensis	virulence_plasmid	pCDU1	hypothetical_protein_813	0	0	97.05	99.26	96.56	98.65	96.8	96.8	0	96.8	100	100	100	100	0	97.05	97.17	96.56	96.56	100	97.63	98.77	0	0	0	0	0	0	0	0	0	0	0	0	0	0	0	0	0	0	0	0	0	0	0	0
Cronobacter_dublinensis	virulence_plasmid	pCDU1	hypothetical_protein_900	0	0	97.56	99.33	97.78	100	100	98	0	97.85	100	100	100	100	0	96.94	99.11	98	98	97.93	0	99.67	0	0	0	0	0	0	0	0	0	0	0	0	0	0	0	0	0	0	0	0	0	0	0	0
Cronobacter_dublinensis	virulence_plasmid	pCDU1	hypothetical_protein_939	0	0	0	99.04	0	99.47	0	97.96	0	0	100	100	100	100	0	97.85	99.25	0	0	97.68	97.6	99.47	0	0	0	0	0	0	0	0	0	0	0	0	0	0	0	0	0	0	0	0	0	0	0	0
Cronobacter_dublinensis	virulence_plasmid	pCDU1	immunity_protein_42_of_polymorphic_toxin_system	0	0	0	98.52	0	0	0	0	0	0	100	100	100	0	0	0	0	0	0	0	0	98.95	0	0	0	0	0	0	0	0	0	0	0	0	0	0	0	0	0	0	0	0	0	0	0	0
Cronobacter_dublinensis	virulence_plasmid	pCDU1	iron_chelate_uptake_ABC_transporter_family_permease_subunit	0	0	95.68	98.08	95.2	98.18	100	95.68	0	95.39	100	100	100	100	0	95.39	95.87	95.59	95.59	98.31	99.14	97.98	0	0	0	0	0	0	0	0	0	0	0	0	0	0	0	0	0	0	0	0	0	0	0	0
Cronobacter_dublinensis	virulence_plasmid	pCDU1	iucC	99.48	99.48	0	0	0	0	0	0	0	0	100	100	100	100	0	0	0	0	0	0	0	0	0	0	0	0	0	0	0	0	0	0	0	0	0	0	0	0	0	0	0	0	0	0	0	0
Cronobacter_dublinensis	virulence_plasmid	pCDU1	methyl-accepting_chemotaxis_protein	0	84.66	97.84	100	97.84	99.13	100	97.84	100	97.23	100	100	100	100	0	97.69	100	100	97.84	100	100	99.13	0	0	0	0	0	0	0	0	0	0	0	0	0	0	0	0	0	85.45	0	0	0	85.45	0	0
Cronobacter_dublinensis	virulence_plasmid	pCDU1	methyl-accepting_chemotaxis_protein_I	0	88.07	94.37	100	95.16	99.4	94.5	94.74	95.96	94.56	100	100	100	100	0	94.68	96.91	94.49	100	100	100	99.4	0	0	0	0	0	0	0	0	0	0	0	0	0	0	0	0	0	0	0	0	0	0	0	0
Cronobacter_dublinensis	virulence_plasmid	pCDU1	mgtA	0	0	97.27	99.52	97.68	99.48	100	96.64	96.46	95.65	100	100	100	100	0	96.17	98.93	97.64	97.64	96.26	96.26	99.56	0	0	0	0	0	0	0	0	0	0	0	0	0	0	0	0	0	0	0	0	0	0	0	0
Cronobacter_dublinensis	virulence_plasmid	pCDU1	multidrug_efflux_RND_transporter_permease_subunit	0	0	0	99.23	0	99.33	0	0	0	0	100	100	100	100	0	0	0	0	0	0	0	99.26	0	0	0	0	0	0	0	0	0	0	0	0	0	0	0	0	0	0	0	0	0	0	0	0
Cronobacter_dublinensis	virulence_plasmid	pCDU1	nuclear_transport_factor_2_family_protein	0	0	100	100	100	100	97.99	100	0	97.99	100	100	100	100	0	97.99	100	100	100	100	0	100	0	0	0	0	0	0	0	0	0	0	0	0	0	0	0	0	0	0	0	0	0	0	0	0
Cronobacter_dublinensis	virulence_plasmid	pCDU1	response_regulator	98.94	98.94	0	100	0	99.47	0	0	0	0	100	100	100	100	0	0	99.74	0	0	0	0	99.47	0	0	0	0	0	0	0	0	0	0	0	0	0	0	0	0	0	0	0	0	0	0	0	0
Cronobacter_dublinensis	virulence_plasmid	pCDU1	response_regulator_transcription_factor	0	0	97.84	100	98.27	100	100	100	100	100	100	100	100	100	0	100	100	98.3	100	100	100	100	0	0	0	0	0	0	0	0	0	0	0	0	0	0	0	0	0	0	0	0	0	0	0	0
Cronobacter_dublinensis	virulence_plasmid	pCDU1	rhomboid_protein	0	0	98.05	98.96	97.66	98.96	97.92	97.53	0	97.92	100	100	100	100	0	97.79	99.22	97.92	97.92	94.66	95.45	98.96	0	0	0	0	0	0	0	0	0	0	0	0	0	0	0	0	0	0	0	0	0	0	0	0
Cronobacter_dublinensis	virulence_plasmid	pCDU1	sensor_domain-containing_diguanylate_cyclase	0	0	97.81	99.14	97.68	98.94	96.89	96.82	0	96.89	100	99.93	100	100	0	97.48	99.01	97.55	100	96.95	96.95	98.94	0	0	0	0	0	0	0	0	0	0	0	0	0	0	0	0	0	0	0	0	0	0	0	0
Cronobacter_dublinensis	virulence_plasmid	pCDU1	siderophore-interacting_protein	98.65	98.65	0	0	0	0	0	0	0	0	100	100	100	100	0	0	0	0	0	0	0	0	0	0	0	0	0	0	0	0	0	0	0	0	0	0	0	0	0	0	0	0	0	0	0	0
Cronobacter_dublinensis	virulence_plasmid	pCDU1	substrate-binding_domain-containing_protein	0	0	97.52	99.26	97.03	99.26	96.78	96.78	96.18	96.78	100	99.88	100	100	0	97.27	98.39	96.41	96.41	96.65	96.65	99.01	0	0	0	0	0	0	0	0	0	0	0	0	0	0	0	0	0	0	0	0	0	0	0	0
Cronobacter_dublinensis	virulence_plasmid	pCDU1	tehA	0	0	97.42	98.51	97.42	99.8	100	97.22	0	96.83	100	100	100	100	0	97.12	99.08	97.04	97.12	96.92	96.84	99.7	0	0	0	0	0	0	0	0	0	0	0	0	0	0	0	0	0	0	0	0	0	0	0	0
Cronobacter_dublinensis	virulence_plasmid	pCDU1	thioredoxin_fold_domain-containing_protein	0	0	97.25	99.63	96.89	99.08	97.44	96.7	0	97.44	100	100	100	100	0	97.44	97.62	100	97.44	97.25	97.25	99.82	0	0	0	0	0	0	0	0	0	0	0	0	0	0	0	0	0	0	0	0	0	0	0	0
Cronobacter_dublinensis	virulence_plasmid	pCDU1	transcription_regulator_Mig-14	98.44	98.44	0	99.22	0	99.33	0	0	0	0	100	100	100	100	0	0	0	0	0	0	0	99.33	0	0	0	0	0	0	0	0	0	0	0	0	0	0	0	0	0	0	0	0	0	0	0	0
Cronobacter_dublinensis	virulence_plasmid	pCDU1	transcriptional_regulator	0	0	98.2	99.21	98.09	98.43	100	98.43	0	98.54	100	100	100	100	0	98.2	99.33	98.54	98.54	97.31	97.31	99.21	0	0	0	0	0	0	0	0	0	0	0	0	0	0	0	0	0	0	0	0	0	0	0	0
Cronobacter_dublinensis	virulence_plasmid	pCDU1	treY	0	0	97.42	100	97.62	98.85	100	96.87	0	97.54	100	99.96	100	100	0	97.23	99.05	97.46	97.46	100	100	98.85	0	0	0	0	0	0	0	0	0	0	0	0	0	0	0	0	0	0	0	0	0	0	0	0
Cronobacter_dublinensis	virulence_plasmid	pCDU1	treZ	99.66	99.61	0	0	0	0	0	0	0	0	100	100	100	100	0	0	0	0	0	0	0	0	0	0	0	0	0	0	0	0	0	0	0	0	0	0	0	0	0	0	0	0	0	0	0	0
Cronobacter_dublinensis	virulence_plasmid	pCDU1	tssB	0	0	97.34	100	100	100	100	96.88	97.14	100	100	100	98.57	100	97.96	100	99.01	0	0	96.09	95.9	100	0	0	0	0	0	0	0	0	0	0	0	0	0	0	0	0	0	0	0	0	0	0	0	0
Cronobacter_dublinensis	virulence_plasmid	pCDU1	tssC	0	0	100	98.9	97.67	99.22	100	0	97.8	100	100	100	99.16	100	99.48	97.99	100	0	0	0	0	100	0	0	0	0	0	0	0	0	0	0	0	0	0	0	0	0	0	0	0	0	0	0	0	0
Cronobacter_dublinensis	virulence_plasmid	pCDU1	tssF	0	0	97.9	76.93	0	0	100	77.13	77.35	100	100	100	100	100	0	0	100	0	0	76.56	100	98.64	0	0	0	0	0	0	0	0	0	0	0	0	0	0	0	0	0	0	0	0	0	0	0	0
Cronobacter_dublinensis	virulence_plasmid	pCDU1	tssG	0	0	97.63	73.97	0	0	100	100	76.17	100	100	100	100	100	0	95.22	100	0	0	73.32	100	99.09	0	0	0	0	0	0	0	0	0	0	0	0	0	0	0	0	0	0	0	0	0	0	0	0
Cronobacter_dublinensis	virulence_plasmid	pCDU1	tssH	0	0	97.82	79.27	0	0	100	0	100	97.89	100	99.89	100	100	0	0	97.55	0	0	0	0	98.82	0	0	0	0	0	0	0	0	0	0	0	0	0	0	0	0	0	0	0	0	0	0	0	0
Cronobacter_dublinensis	virulence_plasmid	pCDU1	tssJ	0	0	97.38	0	0	0	96.63	0	0	97.94	100	100	0	0	0	97.56	99.43	0	0	0	0	98.5	0	0	0	0	0	0	0	0	0	0	0	0	0	0	0	0	0	0	0	0	0	0	0	0
Cronobacter_dublinensis	virulence_plasmid	pCDU1	tssK	0	0	100	0	0	0	97.69	0	0	97.69	100	100	100	100	0	0	98.81	0	0	0	0	99.03	0	0	0	0	0	0	0	0	0	0	0	0	0	0	0	0	0	0	0	0	0	0	0	0
Cronobacter_dublinensis	virulence_plasmid	pCDU1	two-component-system_connector_protein_AriR_protein_1	0	0	97.46	99.64	98.91	99.28	97.83	97.46	97.83	97.83	100	100	100	100	0	97.1	94.57	98.55	98.55	96.74	96.74	99.28	0	0	0	0	0	0	0	0	0	0	0	0	0	0	0	0	0	0	0	0	0	0	0	0
Cronobacter_dublinensis	virulence_plasmid	pCDU1	two-component-system_connector_protein_AriR_protein_2	0	0	94.62	99.64	100	99.64	96.77	96.77	96.49	96.77	100	100	100	100	0	96.77	98.57	96.77	96.77	0	0	99.64	0	0	0	0	0	0	0	0	0	0	0	0	0	0	0	0	0	0	0	0	0	0	0	0
Cronobacter_dublinensis	virulence_plasmid	pCDU1	two-component-system_connector_protein_YcgZ	0	0	97.08	99.17	96.67	99.17	97.5	97.08	0	97.5	100	100	100	100	0	97.92	100	97.08	97.08	97.92	97.92	99.17	0	0	0	0	0	0	0	0	0	0	0	0	0	0	0	0	0	0	0	0	0	0	0	0
Cronobacter_dublinensis	virulence_plasmid	pCDU1	two-component_sensor_histidine_kinase	0	0	97.16	98.41	97.41	99.16	96.66	96.74	100	96.66	100	99.92	100	100	0	96.74	98.75	97.33	97.3	97.49	0	98.91	0	0	0	0	0	0	0	0	0	0	0	0	0	0	0	0	0	0	0	0	0	0	0	0
Cronobacter_dublinensis	virulence_plasmid	pCDU1	type_II_toxin-antitoxin_system_HipA_family_toxin	99.24	99.24	0	0	0	0	0	0	0	0	100	100	100	100	0	0	0	0	0	0	0	0	0	0	0	0	0	0	0	0	0	0	0	0	0	0	0	0	0	0	0	0	0	0	0	0
Cronobacter_dublinensis	virulence_plasmid	pCDU1	type_VI_secretion_protein	0	0	97.58	0	0	0	97.15	0	0	97.15	100	99.91	100	100	0	0	0	0	0	0	0	97.67	0	0	0	0	0	0	0	0	0	0	0	0	0	0	0	0	0	0	0	0	0	0	0	0
Cronobacter_dublinensis	virulence_plasmid	pCDU1	type_VI_secretion_protein_VasK	0	0	97.17	0	0	0	100	0	0	97.03	100	100	100	100	0	96.1	98.23	0	0	0	0	98.78	0	0	0	0	0	0	0	0	0	0	0	0	0	0	0	0	0	0	0	0	0	0	0	0
Cronobacter_dublinensis	virulence_plasmid	pCDU1	type_VI_secretion_system_tube_protein_Hcp	0	0	97.72	98.76	97.72	98.76	96.69	97.72	0	97.52	100	100	100	100	0	97.52	98.55	97.72	97.72	98.22	0	98.76	0	0	0	0	0	0	0	0	0	0	0	0	0	0	0	0	0	0	0	0	0	0	0	0
Cronobacter_dublinensis	virulence_plasmid	pCDU1	tyrosine-type_recombinase/integrase	0	0	89.23	97.54	89.54	97.44	100	89.03	86.97	89.13	100	99.9	100	100	0	89.54	93.34	89.13	89.13	91.04	0	98.67	0	0	0	0	0	0	0	0	0	0	0	0	0	0	0	0	0	0	0	0	0	0	0	0
Cronobacter_dublinensis	virulence_plasmid	pCDU1	vgrG	0	0	96.75	0	0	0	96.57	0	96.47	96.57	100	100	100	100	0	0	97.64	0	0	0	0	99.12	0	0	0	0	0	0	0	0	0	0	0	0	0	0	0	0	0	0	0	0	0	0	0	0
Cronobacter_malonaticus	heavy_metal_resistance	p2	AbrB/MazE/SpoVT_family_DNA-binding_domain-containing_protein	0	0	0	0	0	97.84	0	0	0	0	0	0	0	0	0	96.97	0	85.92	85.92	0	0	0	0	0	0	0	0	0	0	0	0	0	0	0	0	0	100	100	0	0	97.84	97.84	0	0	0	0
Cronobacter_malonaticus	heavy_metal_resistance	p2	DNA_partition_complex_ParG	0	0	0	0	0	98.33	98.33	99.58	0	98.33	0	0	0	0	0	98.75	0	0	0	0	0	0	0	0	0	0	0	0	0	0	0	0	0	0	0	0	99.17	100	0	0	99.17	99.17	0	0	0	0
Cronobacter_malonaticus	heavy_metal_resistance	p2	DUF2933_domain-containing_protein	0	0	0	0	0	0	0	0	0	0	0	0	0	0	0	0	0	0	0	0	0	0	0	0	0	0	0	0	0	0	0	0	0	0	0	0	100	100	0	0	0	0	0	0	98.99	99.49
Cronobacter_malonaticus	heavy_metal_resistance	p2	DUF305_domain-containing_protein	0	0	0	0	0	0	0	0	0	0	0	0	0	0	0	0	0	0	0	0	0	0	0	0	0	0	0	0	0	0	0	0	0	0	0	0	100	100	0	0	0	0	0	0	93.4	93.4
Cronobacter_malonaticus	heavy_metal_resistance	p2	DUF4145_domain-containing_protein	0	0	0	0	0	0	0	0	0	0	0	0	0	0	0	0	0	0	0	0	0	0	0	0	0	0	0	0	0	0	0	0	0	0	0	0	100	100	0	0	0	0	0	0	0	0
Cronobacter_malonaticus	heavy_metal_resistance	p2	DUF4225_domain-containing_protein	0	0	0	0	0	96.14	0	95.27	0	0	0	0	0	0	0	93.62	0	0	0	0	0	0	0	0	0	0	0	0	0	0	0	0	0	0	0	0	99.88	100	0	0	96.14	96.14	0	0	0	0
Cronobacter_malonaticus	heavy_metal_resistance	p2	HNH_endonuclease	0	0	0	0	0	0	0	0	0	0	0	0	0	0	0	0	0	0	0	0	0	0	0	0	0	0	0	0	0	0	0	0	0	0	0	0	100	100	0	0	0	0	0	0	0	0
Cronobacter_malonaticus	heavy_metal_resistance	p2	Hok/Gef_family_protein	0	0	85.53	0	85.53	98.74	100	100	85.53	100	0	0	0	0	0	100	0	100	100	85.53	0	0	86.16	86.16	86.16	86.16	86.16	86.16	86.16	86.16	86.16	86.16	86.16	86.16	0	0	98.74	100	86.79	0	98.74	98.74	0	84.91	86.79	86.16
Cronobacter_malonaticus	heavy_metal_resistance	p2	IS66-like_element_ISKpn24_family_transposase	0	0	0	0	0	0	0	0	0	0	0	0	0	0	0	0	0	0	0	0	0	0	0	0	0	0	0	0	0	0	0	0	0	0	0	0	0	100	0	0	0	0	0	0	0	0
Cronobacter_malonaticus	heavy_metal_resistance	p2	IS66_family_insertion_sequence_hypothetical_protein	0	0	0	0	0	0	0	0	0	0	0	0	0	0	0	0	0	0	0	0	0	0	0	0	0	0	0	0	0	0	0	0	0	0	0	0	0	100	0	0	0	0	0	0	0	0
Cronobacter_malonaticus	heavy_metal_resistance	p2	M23_family_metallopeptidase	0	0	0	0	0	0	0	0	0	0	0	0	0	0	0	100	0	0	0	0	0	0	0	0	0	0	0	0	0	0	0	0	0	0	0	0	100	100	0	0	0	0	0	0	100	100
Cronobacter_malonaticus	heavy_metal_resistance	p2	N-acetyltransferase	0	0	0	0	0	0	0	0	0	0	0	0	0	0	0	100	0	0	0	0	0	0	0	0	0	0	0	0	0	0	0	0	0	0	0	0	0	100	0	0	0	0	0	0	0	0
Cronobacter_malonaticus	heavy_metal_resistance	p2	ParA_family_protein	0	0	0	0	0	98.87	98.71	99.84	0	98.71	0	0	0	0	0	98.87	0	0	0	0	0	0	0	0	0	0	0	0	0	0	0	0	0	0	0	0	98.54	100	0	0	98.54	98.54	0	0	0	0
Cronobacter_malonaticus	heavy_metal_resistance	p2	RepB_family_plasmid_replication_initiator_protein	0	0	0	0	0	99.66	99.43	100	0	99.43	0	0	0	0	0	99.54	0	0	0	0	0	0	0	0	0	0	0	0	0	0	0	0	0	0	0	0	99.66	100	0	0	99.77	99.77	0	0	0	0
Cronobacter_malonaticus	heavy_metal_resistance	p2	aquaporin	0	0	0	0	0	0	0	0	0	0	0	0	0	0	0	100	0	0	0	0	0	0	0	0	0	0	0	0	0	0	0	0	0	0	0	0	100	100	0	0	0	0	0	0	0	0
Cronobacter_malonaticus	heavy_metal_resistance	p2	arsA	0	0	0	0	0	0	0	0	0	0	0	0	0	0	0	97.43	0	0	0	0	0	0	0	0	0	0	0	0	0	0	0	0	0	0	0	0	99.94	100	0	0	0	0	0	0	0	0
Cronobacter_malonaticus	heavy_metal_resistance	p2	arsB	0	0	0	0	0	0	0	0	0	0	0	0	0	0	0	99.07	0	0	0	0	0	0	0	0	0	0	0	0	0	0	0	0	0	0	0	0	100	100	0	0	0	0	0	0	0	0
Cronobacter_malonaticus	heavy_metal_resistance	p2	arsC	0	0	0	0	0	0	0	0	0	0	0	0	0	0	0	100	0	0	0	0	0	0	0	0	0	0	0	0	0	0	0	0	0	0	0	0	100	100	0	0	0	0	0	0	0	0
Cronobacter_malonaticus	heavy_metal_resistance	p2	arsD	0	0	0	0	0	0	0	0	0	0	0	0	0	0	0	100	0	0	0	0	0	0	0	0	0	0	0	0	0	0	0	0	0	0	0	0	99.72	100	0	0	0	0	0	0	0	0
Cronobacter_malonaticus	heavy_metal_resistance	p2	arsR	0	0	0	0	0	0	0	0	0	0	0	0	0	0	0	100	0	0	0	0	0	0	0	0	0	0	0	0	0	0	0	0	0	0	0	0	100	100	0	0	0	0	0	0	0	0
Cronobacter_malonaticus	heavy_metal_resistance	p2	arsenite-activated_ATPase_ArsA_family_2	0	0	0	0	0	0	0	0	0	0	0	0	0	0	0	100	0	0	0	0	0	0	0	0	0	0	0	0	0	0	0	0	0	0	0	0	100	100	0	0	0	0	0	0	0	0
Cronobacter_malonaticus	heavy_metal_resistance	p2	conjugal_transfer_protein_TraX	0	0	0	0	0	92.76	94.63	100	0	94.63	0	0	0	0	0	0	0	96.51	96.51	0	0	0	0	0	0	0	0	0	0	0	0	0	0	0	0	0	100	100	0	0	92.76	92.76	0	0	0	0
Cronobacter_malonaticus	heavy_metal_resistance	p2	cusF	0	0	0	0	0	0	0	0	0	0	0	0	0	0	0	99.44	0	0	0	0	0	0	0	0	0	0	0	0	0	0	0	0	0	0	0	0	100	100	0	0	0	0	0	0	95.48	95.48
Cronobacter_malonaticus	heavy_metal_resistance	p2	hypothetical_protein	0	0	0	0	0	95.37	0	95.99	0	0	0	0	0	0	0	0	0	0	0	0	0	0	0	0	0	0	0	0	0	0	0	0	0	0	0	0	100	100	0	0	95.37	95.37	0	0	0	0
Cronobacter_malonaticus	heavy_metal_resistance	p2	hypothetical_protein_1086	0	0	0	0	0	96.22	0	96.78	0	0	0	0	0	0	0	97.51	0	0	0	0	0	0	0	0	0	0	0	0	0	0	0	0	0	0	0	0	100	100	0	0	96.22	96.22	0	0	0	0
Cronobacter_malonaticus	heavy_metal_resistance	p2	hypothetical_protein_192	0	0	0	0	0	0	0	0	0	0	0	0	0	0	0	0	0	0	0	0	0	0	0	0	0	0	0	0	0	0	0	0	0	0	0	0	0	100	0	0	0	0	0	0	0	0
Cronobacter_malonaticus	heavy_metal_resistance	p2	hypothetical_protein_213	0	0	0	0	0	98.1	0	95.73	0	0	0	0	0	0	0	0	0	0	0	0	0	0	0	0	0	0	0	0	0	0	0	0	0	0	0	0	100	100	0	0	98.1	98.1	0	0	0	0
Cronobacter_malonaticus	heavy_metal_resistance	p2	hypothetical_protein_219	0	0	0	0	0	99.09	98.63	97.26	0	98.63	0	0	0	0	0	99.09	0	0	0	0	0	0	0	0	0	0	0	0	0	0	0	0	0	0	0	0	98.63	100	0	0	99.54	99.54	0	0	0	0
Cronobacter_malonaticus	heavy_metal_resistance	p2	hypothetical_protein_324	0	0	0	0	0	95.37	0	95.99	0	0	0	0	0	0	0	0	0	0	0	0	0	0	0	0	0	0	0	0	0	0	0	0	0	0	0	0	100	100	0	0	95.37	95.37	0	0	0	0
Cronobacter_malonaticus	heavy_metal_resistance	p2	hypothetical_protein_381	0	0	0	0	0	0	0	0	0	0	0	0	0	0	0	99.77	0	0	0	0	0	0	0	0	0	0	0	0	0	0	0	0	0	0	0	0	100	100	0	0	0	0	0	0	99.77	99.77
Cronobacter_malonaticus	heavy_metal_resistance	p2	hypothetical_protein_441	0	0	0	0	0	0	0	0	0	0	0	0	0	0	0	99.77	0	0	0	0	0	0	0	0	0	0	0	0	0	0	0	0	0	0	0	0	99.77	100	0	0	0	0	0	0	0	0
Cronobacter_malonaticus	heavy_metal_resistance	p2	hypothetical_protein_498	0	0	0	0	0	91.57	89.37	90.96	0	89.37	0	0	0	0	0	95.38	0	92.02	92.02	0	0	0	0	0	0	0	0	0	0	0	0	0	0	0	0	0	100	100	0	0	91.57	91.57	0	0	0	0
Cronobacter_malonaticus	heavy_metal_resistance	p2	hypothetical_protein_561	0	0	0	0	0	92.51	0	92.67	0	0	0	0	0	0	0	0	0	0	0	0	0	0	0	0	0	0	0	0	0	0	0	0	0	0	0	0	100	100	0	0	92.51	92.51	0	0	0	0
Cronobacter_malonaticus	heavy_metal_resistance	p2	hypothetical_protein_600	0	0	0	0	0	0	89.28	89.28	0	89.28	0	0	0	0	0	90.33	0	0	88.05	0	0	0	0	0	0	0	0	0	0	0	0	0	0	0	0	0	100	100	0	0	0	0	0	0	0	0
Cronobacter_malonaticus	heavy_metal_resistance	p2	hypothetical_protein_843	0	0	0	0	0	93.33	0	0	0	0	0	0	0	0	0	93.7	0	0	0	0	0	0	0	0	0	0	0	0	0	0	0	0	0	0	0	0	0	100	0	0	0	0	0	0	0	0
Cronobacter_malonaticus	heavy_metal_resistance	p2	pcoA	0	0	0	0	0	86.52	0	0	0	0	0	0	0	0	0	99.94	0	0	0	0	0	0	0	0	0	0	0	0	0	0	0	0	0	0	0	0	99.94	100	0	0	86.52	86.52	0	0	99.67	99.83
Cronobacter_malonaticus	heavy_metal_resistance	p2	pcoB	0	0	0	0	0	82.32	0	0	0	0	0	0	0	0	0	100	0	0	0	0	0	0	0	0	0	0	0	0	0	0	0	0	0	0	0	0	99.89	100	0	0	82.32	82.32	0	0	100	100
Cronobacter_malonaticus	heavy_metal_resistance	p2	pcoC	0	0	0	0	0	0	0	0	0	0	0	0	0	0	0	99.74	0	0	0	0	0	0	0	0	0	0	0	0	0	0	0	0	0	0	0	0	99.74	100	0	0	0	0	0	0	100	100
Cronobacter_malonaticus	heavy_metal_resistance	p2	pcoD	0	0	0	0	0	0	0	0	0	0	0	0	0	0	0	99.89	0	0	0	0	0	0	0	0	0	0	0	0	0	0	0	0	0	0	0	0	99.78	100	0	0	0	0	0	0	99.78	99.78
Cronobacter_malonaticus	heavy_metal_resistance	p2	pcoE	0	0	0	0	0	82.76	0	0	0	0	0	0	0	0	0	100	0	0	0	0	0	0	0	0	0	0	0	0	0	0	0	0	0	0	0	0	100	100	0	0	82.76	82.76	0	0	0	0
Cronobacter_malonaticus	heavy_metal_resistance	p2	pcoR	0	0	0	0	0	84.9	0	0	0	0	0	0	0	0	0	100	0	0	0	0	0	0	0	0	0	0	0	0	0	0	0	0	0	0	0	0	100	100	0	0	84.9	84.9	0	0	100	100
Cronobacter_malonaticus	heavy_metal_resistance	p2	pcoS	0	0	0	0	0	84.59	0	0	0	0	0	0	0	0	0	100	0	0	0	0	0	0	0	0	0	0	0	0	0	0	0	0	0	0	0	0	99.93	100	0	0	84.59	84.59	0	0	99.71	99.64
Cronobacter_malonaticus	heavy_metal_resistance	p2	phage_T7_exclusion_protein	0	0	0	0	0	94.27	0	95.86	0	0	0	0	0	0	0	0	0	0	0	0	0	0	0	0	0	0	0	0	0	0	0	0	0	0	0	0	99.95	100	0	0	94.27	94.27	0	0	0	0
Cronobacter_malonaticus	heavy_metal_resistance	p2	phage_integrase_family_protein	0	0	0	0	0	99.11	88.29	99.11	0	93.28	0	0	0	0	0	98.61	0	94.51	94.43	0	0	0	0	0	0	0	0	0	0	0	0	0	0	0	0	0	0	100	0	0	92.05	92.05	0	0	0	0
Cronobacter_malonaticus	heavy_metal_resistance	p2	replication_initiator_protein_RepA	0	0	0	0	0	99.12	100	100	0	97.81	0	0	0	0	0	98.9	0	98.96	98.79	0	0	0	0	0	0	0	0	0	0	0	0	0	0	0	0	0	98.57	100	0	0	98.68	98.68	0	0	0	0
Cronobacter_malonaticus	heavy_metal_resistance	p2	silA	0	0	0	0	0	87.73	0	0	0	0	0	0	0	0	0	99.87	0	0	0	0	0	0	0	0	0	0	0	0	0	0	0	0	0	0	0	0	99.97	100	0	0	87.73	87.73	0	0	94.97	95
Cronobacter_malonaticus	heavy_metal_resistance	p2	silB	0	0	0	0	0	85.79	0	0	0	0	0	0	0	0	0	99.92	0	0	0	0	0	0	0	0	0	0	0	0	0	0	0	0	0	0	0	0	100	100	0	0	85.79	85.79	0	0	94.43	94.43
Cronobacter_malonaticus	heavy_metal_resistance	p2	silC	0	0	0	0	0	85.21	0	0	0	0	0	0	0	0	0	0	0	0	0	0	0	0	100	0	0	0	0	0	0	0	0	0	0	0	0	0	99.78	100	0	0	85.14	85.14	0	0	98.63	98.85
Cronobacter_malonaticus	heavy_metal_resistance	p2	silE	0	0	0	0	0	0	0	0	0	0	0	0	0	0	0	0	0	0	0	0	0	0	0	0	0	0	0	0	0	0	0	0	0	0	0	0	100	100	0	0	0	0	0	0	0	0
Cronobacter_malonaticus	heavy_metal_resistance	p2	silP	0	0	0	0	0	100	0	0	0	0	0	0	0	0	0	97.53	0	0	0	0	0	0	0	0	0	0	0	0	0	0	0	0	0	0	0	0	99.96	100	0	0	83.05	83.05	0	0	97.01	97.09
Cronobacter_malonaticus	heavy_metal_resistance	p2	silR	0	0	0	0	0	0	0	0	0	0	0	0	0	0	0	0	0	0	0	0	0	0	100	0	0	0	0	0	0	0	0	0	0	0	0	0	99.85	100	0	0	0	0	0	0	99.56	99.85
Cronobacter_malonaticus	heavy_metal_resistance	p2	silS	0	0	0	0	0	83.1	0	0	0	0	0	0	0	0	0	0	0	0	0	0	0	0	0	0	0	0	0	0	0	0	0	0	0	0	0	0	100	100	0	0	83.1	83.1	0	0	99.19	99.12
Cronobacter_malonaticus	heavy_metal_resistance	p2	thioredoxin_domain-containing_protein	0	0	0	0	0	100	97.57	95.56	0	100	0	0	0	0	0	100	0	0	0	0	0	0	0	0	0	0	0	0	0	0	0	0	0	0	0	0	90.37	100	0	0	0	0	0	0	0	0
Cronobacter_malonaticus	heavy_metal_resistance	p2	tnpB	0	0	0	0	0	0	0	0	0	0	0	0	0	0	0	0	0	0	0	0	0	0	0	0	0	0	0	0	0	0	0	0	0	0	0	0	0	100	0	0	0	0	0	0	85.12	0
Cronobacter_malonaticus	heavy_metal_resistance	p2	type_II_toxin-antitoxin_system_RelE/ParE_family_toxin	0	0	0	0	0	94.83	0	0	0	0	0	0	0	0	0	100	0	0	0	0	0	0	0	0	0	0	0	0	0	0	0	0	0	0	0	0	100	100	0	0	94.83	94.83	0	0	0	0
Cronobacter_malonaticus	heavy_metal_resistance	p2	type_II_toxin-antitoxin_system_VapC_family_toxin	0	0	0	0	0	98.08	0	0	0	0	0	0	0	0	0	98.56	0	0	0	0	0	0	0	0	0	0	0	0	0	0	0	0	0	0	0	0	100	100	0	0	98.08	98.08	0	0	0	0
Cronobacter_malonaticus	heavy_metal_resistance	pCMA2	AbrB/MazE/SpoVT_family_DNA-binding_domain-containing_protein	0	0	0	0	0	97.84	0	0	0	0	0	0	0	0	0	96.97	0	85.92	85.92	0	0	0	0	0	0	0	0	0	0	0	0	0	0	0	0	0	100	100	0	0	97.84	97.84	0	0	0	0
Cronobacter_malonaticus	heavy_metal_resistance	pCMA2	DNA_partition_complex_ParG	0	0	0	0	0	98.33	98.33	98.75	0	98.33	0	0	0	0	0	98.75	0	0	0	0	0	0	0	0	0	0	0	0	0	0	0	0	0	0	0	0	100	99.17	0	0	99.17	99.17	0	0	0	0
Cronobacter_malonaticus	heavy_metal_resistance	pCMA2	DUF2933_domain-containing_protein	0	0	0	0	0	0	0	0	0	0	0	0	0	0	0	0	0	0	0	0	0	0	0	0	0	0	0	0	0	0	0	0	0	0	0	0	100	100	0	0	0	0	0	0	98.99	99.49
Cronobacter_malonaticus	heavy_metal_resistance	pCMA2	DUF305_domain-containing_protein	0	0	0	0	0	0	0	0	0	0	0	0	0	0	0	0	0	0	0	0	0	0	0	0	0	0	0	0	0	0	0	0	0	0	0	0	100	100	0	0	0	0	0	0	93.4	93.4
Cronobacter_malonaticus	heavy_metal_resistance	pCMA2	DUF4145_domain-containing_protein	0	0	0	0	0	0	0	0	0	0	0	0	0	0	0	0	0	0	0	0	0	0	0	0	0	0	0	0	0	0	0	0	0	0	0	0	100	100	0	0	0	0	0	0	0	0
Cronobacter_malonaticus	heavy_metal_resistance	pCMA2	DUF4225_domain-containing_protein	0	0	0	0	0	96.02	0	95.4	0	0	0	0	0	0	0	93.62	0	0	0	0	0	0	0	0	0	0	0	0	0	0	0	0	0	0	0	0	100	99.88	0	0	96.02	96.02	0	0	0	0
Cronobacter_malonaticus	heavy_metal_resistance	pCMA2	DUF5431_family_protein	0	0	0	0	0	99.29	100	99.29	0	97.87	0	0	0	0	0	99.29	0	99.29	99.29	0	0	0	0	0	0	0	0	0	0	0	0	0	0	0	0	0	100	98.58	0	0	98.58	98.58	0	0	0	0
Cronobacter_malonaticus	heavy_metal_resistance	pCMA2	GNAT_family_N-acetyltransferase	0	0	0	0	0	0	0	0	0	0	0	0	0	0	0	100	0	0	0	0	0	0	0	0	0	0	0	0	0	0	0	0	0	0	0	0	100	100	0	0	0	0	0	0	0	0
Cronobacter_malonaticus	heavy_metal_resistance	pCMA2	HNH_endonuclease	0	0	0	0	0	0	0	0	0	0	0	0	0	0	0	0	0	0	0	0	0	0	0	0	0	0	0	0	0	0	0	0	0	0	0	0	100	100	0	0	0	0	0	0	0	0
Cronobacter_malonaticus	heavy_metal_resistance	pCMA2	M23_family_metallopeptidase	0	0	0	0	0	0	0	0	0	0	0	0	0	0	0	98.92	0	0	0	0	0	0	0	0	0	0	0	0	0	0	0	0	0	0	0	0	100	99.46	0	0	0	0	0	0	98.1	98.1
Cronobacter_malonaticus	heavy_metal_resistance	pCMA2	N-acetyltransferase	0	0	0	0	0	0	0	0	0	0	0	0	0	0	0	0	0	0	0	0	0	0	0	0	0	0	0	0	0	0	0	0	0	0	0	0	100	0	0	0	0	0	0	0	0	0
Cronobacter_malonaticus	heavy_metal_resistance	pCMA2	ParA_family_protein	0	0	0	0	0	98.38	99.19	98.71	0	99.19	0	0	0	0	0	98.71	0	0	0	0	0	0	0	0	0	0	0	0	0	0	0	0	0	0	0	0	100	98.54	0	0	99.03	99.03	0	0	0	0
Cronobacter_malonaticus	heavy_metal_resistance	pCMA2	RepB_family_plasmid_replication_initiator_protein	0	0	0	0	0	99.54	99.54	99.66	0	99.54	0	0	0	0	0	99.43	0	0	0	0	0	0	0	0	0	0	0	0	0	0	0	0	0	0	0	0	100	99.66	0	0	99.66	99.66	0	0	0	0
Cronobacter_malonaticus	heavy_metal_resistance	pCMA2	aquaporin	0	0	0	0	0	0	0	0	0	0	0	0	0	0	0	100	0	0	0	0	0	0	0	0	0	0	0	0	0	0	0	0	0	0	0	0	100	100	0	0	0	0	0	0	0	0
Cronobacter_malonaticus	heavy_metal_resistance	pCMA2	arsA	0	0	0	0	0	0	0	0	0	0	0	0	0	0	0	97.49	0	0	0	0	0	0	0	0	0	0	0	0	0	0	0	0	0	0	0	0	100	99.94	0	0	0	0	0	0	0	0
Cronobacter_malonaticus	heavy_metal_resistance	pCMA2	arsB	0	0	0	0	0	0	0	0	0	0	0	0	0	0	0	99.07	0	0	0	0	0	0	0	0	0	0	0	0	0	0	0	0	0	0	0	0	100	100	0	0	0	0	0	0	0	0
Cronobacter_malonaticus	heavy_metal_resistance	pCMA2	arsC	0	0	0	0	0	0	0	0	0	0	0	0	0	0	0	100	0	0	0	0	0	0	0	0	0	0	0	0	0	0	0	0	0	0	0	0	100	100	0	0	0	0	0	0	0	0
Cronobacter_malonaticus	heavy_metal_resistance	pCMA2	arsD	0	0	0	0	0	0	0	0	0	0	0	0	0	0	0	99.72	0	0	0	0	0	0	0	0	0	0	0	0	0	0	0	0	0	0	0	0	100	99.72	0	0	0	0	0	0	0	0
Cronobacter_malonaticus	heavy_metal_resistance	pCMA2	arsR	0	0	0	0	0	0	0	0	0	0	0	0	0	0	0	100	0	0	0	0	0	0	0	0	0	0	0	0	0	0	0	0	0	0	0	0	100	100	0	0	0	0	0	0	0	0
Cronobacter_malonaticus	heavy_metal_resistance	pCMA2	arsenite-activated_ATPase_ArsA_family	0	0	0	0	0	0	0	0	0	0	0	0	0	0	0	100	0	0	0	0	0	0	0	0	0	0	0	0	0	0	0	0	0	0	0	0	100	100	0	0	0	0	0	0	0	0
Cronobacter_malonaticus	heavy_metal_resistance	pCMA2	conjugal_transfer_protein	0	0	0	0	0	0	0	0	0	0	0	0	0	0	0	0	0	98.1	97.53	0	0	0	0	0	0	0	0	0	0	0	0	0	0	0	0	0	100	0	0	0	0	0	0	0	0	0
Cronobacter_malonaticus	heavy_metal_resistance	pCMA2	conjugal_transfer_protein_TraA	0	0	0	0	0	98.18	0	98.18	0	0	0	0	0	0	0	98.18	0	95.15	95.15	0	0	0	0	0	0	0	0	0	0	0	0	0	0	0	0	0	100	0	0	0	0	0	0	0	0	0
Cronobacter_malonaticus	heavy_metal_resistance	pCMA2	conjugal_transfer_protein_TraX	0	0	0	0	0	92.76	94.63	100	0	94.63	0	0	0	0	0	0	0	96.51	96.51	0	0	0	0	0	0	0	0	0	0	0	0	0	0	0	0	0	100	100	0	0	92.76	92.76	0	0	0	0
Cronobacter_malonaticus	heavy_metal_resistance	pCMA2	copper_resistance_protein	0	0	0	0	0	0	0	0	0	0	0	0	0	0	0	99.78	0	0	0	0	0	0	0	0	0	0	0	0	0	0	0	0	0	0	0	0	100	100	0	0	0	0	0	0	99.78	99.78
Cronobacter_malonaticus	heavy_metal_resistance	pCMA2	cusF	0	0	0	0	0	0	0	0	0	0	0	0	0	0	0	99.44	0	0	0	0	0	0	0	0	0	0	0	0	0	0	0	0	0	0	0	0	100	100	0	0	0	0	0	0	95.48	95.48
Cronobacter_malonaticus	heavy_metal_resistance	pCMA2	hypothetical_protein_1086	0	0	0	0	0	96.22	0	96.78	0	0	0	0	0	0	0	97.51	0	0	0	0	0	0	0	0	0	0	0	0	0	0	0	0	0	0	0	0	100	100	0	0	96.22	96.22	0	0	0	0
Cronobacter_malonaticus	heavy_metal_resistance	pCMA2	hypothetical_protein_213	0	0	0	0	0	98.1	0	95.73	0	0	0	0	0	0	0	0	0	0	0	0	0	0	0	0	0	0	0	0	0	0	0	0	0	0	0	0	100	100	0	0	98.1	98.1	0	0	0	0
Cronobacter_malonaticus	heavy_metal_resistance	pCMA2	hypothetical_protein_219	0	0	0	0	0	99.54	100	97.72	0	100	0	0	0	0	0	99.54	0	0	0	0	0	0	0	0	0	0	0	0	0	0	0	0	0	0	0	0	100	98.63	0	0	98.17	98.17	0	0	0	0
Cronobacter_malonaticus	heavy_metal_resistance	pCMA2	hypothetical_protein_324	0	0	0	0	0	95.37	0	95.99	0	0	0	0	0	0	0	0	0	0	0	0	0	0	0	0	0	0	0	0	0	0	0	0	0	0	0	0	100	100	0	0	95.37	95.37	0	0	0	0
Cronobacter_malonaticus	heavy_metal_resistance	pCMA2	hypothetical_protein_333	0	0	0	0	0	0	0	0	0	0	0	0	0	0	0	0	0	0	0	0	0	0	0	0	0	0	0	0	0	0	0	0	0	0	0	0	100	0	0	0	0	0	0	0	0	0
Cronobacter_malonaticus	heavy_metal_resistance	pCMA2	hypothetical_protein_441	0	0	0	0	0	86.85	0	0	0	0	0	0	0	0	0	100	0	0	0	0	0	0	0	0	0	0	0	0	0	0	0	0	0	0	0	0	100	99.77	0	0	86.85	86.85	0	0	0	0
Cronobacter_malonaticus	heavy_metal_resistance	pCMA2	hypothetical_protein_498	0	0	0	0	0	91.57	89.37	90.96	0	89.37	0	0	0	0	0	95.38	0	92.02	92.02	0	0	0	0	0	0	0	0	0	0	0	0	0	0	0	0	0	100	100	0	0	91.57	91.57	0	0	0	0
Cronobacter_malonaticus	heavy_metal_resistance	pCMA2	hypothetical_protein_561	0	0	0	0	0	92.51	0	92.67	0	0	0	0	0	0	0	0	0	0	0	0	0	0	0	0	0	0	0	0	0	0	0	0	0	0	0	0	100	100	0	0	92.51	92.51	0	0	0	0
Cronobacter_malonaticus	heavy_metal_resistance	pCMA2	hypothetical_protein_735	0	0	0	0	0	0	100	0	0	79.79	0	0	0	0	0	0	0	0	0	0	0	0	0	0	0	0	0	0	0	0	0	0	0	0	0	0	100	0	0	0	0	0	0	0	0	0
Cronobacter_malonaticus	heavy_metal_resistance	pCMA2	hypothetical_protein_846	0	0	0	0	0	0	94.21	97.64	0	94.21	0	0	0	0	0	0	0	0	0	0	0	0	0	0	0	0	0	0	0	0	0	0	0	0	0	0	100	0	0	0	0	0	0	0	0	0
Cronobacter_malonaticus	heavy_metal_resistance	pCMA2	pcoA	0	0	0	0	0	86.47	0	0	0	0	0	0	0	0	0	100	0	0	0	0	0	0	0	0	0	0	0	0	0	0	0	0	0	0	0	0	100	99.94	0	0	86.47	86.47	0	0	99.72	99.89
Cronobacter_malonaticus	heavy_metal_resistance	pCMA2	pcoB	0	0	0	0	0	82.44	0	0	0	0	0	0	0	0	0	99.89	0	0	0	0	0	0	0	0	0	0	0	0	0	0	0	0	0	0	0	0	100	99.89	0	0	82.44	82.44	0	0	99.89	99.89
Cronobacter_malonaticus	heavy_metal_resistance	pCMA2	pcoC	0	0	0	0	0	0	0	0	0	0	0	0	0	0	0	100	0	0	0	0	0	0	0	0	0	0	0	0	0	0	0	0	0	0	0	0	100	99.74	0	0	0	0	0	0	99.74	99.74
Cronobacter_malonaticus	heavy_metal_resistance	pCMA2	pcoD	0	0	0	0	0	0	0	0	0	0	0	0	0	0	0	99.89	0	0	0	0	0	0	0	0	0	0	0	0	0	0	0	0	0	0	0	0	100	99.78	0	0	0	0	0	0	99.78	99.78
Cronobacter_malonaticus	heavy_metal_resistance	pCMA2	pcoE	0	0	0	0	0	82.76	0	0	0	0	0	0	0	0	0	100	0	0	0	0	0	0	0	0	0	0	0	0	0	0	0	0	0	0	0	0	100	100	0	0	82.76	82.76	0	0	0	0
Cronobacter_malonaticus	heavy_metal_resistance	pCMA2	pcoR	0	0	0	0	0	84.9	0	0	0	0	0	0	0	0	0	100	0	0	0	0	0	0	0	0	0	0	0	0	0	0	0	0	0	0	0	0	100	100	0	0	84.9	84.9	0	0	100	100
Cronobacter_malonaticus	heavy_metal_resistance	pCMA2	pcoS	0	0	0	0	0	84.59	0	0	0	0	0	0	0	0	0	99.93	0	0	0	0	0	0	0	0	0	0	0	0	0	0	0	0	0	0	0	0	100	99.93	0	0	84.59	84.59	0	0	99.64	99.57
Cronobacter_malonaticus	heavy_metal_resistance	pCMA2	phage_T7_exclusion_protein	0	0	0	0	0	94.27	0	95.86	0	0	0	0	0	0	0	0	0	0	0	0	0	0	0	0	0	0	0	0	0	0	0	0	0	0	0	0	100	99.95	0	0	94.27	94.27	0	0	0	0
Cronobacter_malonaticus	heavy_metal_resistance	pCMA2	phage_integrase_family_protein	0	0	0	0	0	0	100	0	0	94.4	0	0	0	0	0	97.76	0	93.42	93.42	0	0	0	0	0	0	0	0	0	0	0	0	0	0	0	0	0	100	0	0	0	91.96	91.96	0	0	0	0
Cronobacter_malonaticus	heavy_metal_resistance	pCMA2	replication_initiator_protein_RepA	0	0	0	0	0	98.79	100	100	0	97.7	0	0	0	0	0	98.36	0	99.09	98.68	0	0	0	0	0	0	0	0	0	0	0	0	0	0	0	0	0	100	98.57	0	0	98.36	98.36	0	0	0	0
Cronobacter_malonaticus	heavy_metal_resistance	pCMA2	silA	0	0	0	0	0	87.77	0	0	0	0	0	0	0	0	0	99.9	0	0	0	0	0	0	0	0	0	0	0	0	0	0	0	0	0	0	0	0	100	99.97	0	0	87.77	87.77	0	0	95.01	95.04
Cronobacter_malonaticus	heavy_metal_resistance	pCMA2	silB	0	0	0	0	0	85.79	0	0	0	0	0	0	0	0	0	99.92	0	0	0	0	0	0	0	0	0	0	0	0	0	0	0	0	0	0	0	0	100	100	0	0	85.79	85.79	0	0	94.43	94.43
Cronobacter_malonaticus	heavy_metal_resistance	pCMA2	silC	0	0	0	0	0	85.21	0	0	0	0	0	0	0	0	0	0	0	0	0	0	0	0	100	0	0	0	0	0	0	0	0	0	0	0	0	0	100	99.78	0	0	85.14	85.14	0	0	98.41	98.63
Cronobacter_malonaticus	heavy_metal_resistance	pCMA2	silE	0	0	0	0	0	0	0	0	0	0	0	0	0	0	0	0	0	0	0	0	0	0	0	0	0	0	0	0	0	0	0	0	0	0	0	0	100	100	0	0	0	0	0	0	0	0
Cronobacter_malonaticus	heavy_metal_resistance	pCMA2	silP	0	0	0	0	0	100	0	0	0	0	0	0	0	0	0	97.57	0	0	0	0	0	0	0	0	0	0	0	0	0	0	0	0	0	0	0	0	100	99.96	0	0	83.09	83.09	0	0	97.05	97.13
Cronobacter_malonaticus	heavy_metal_resistance	pCMA2	silR	0	0	0	0	0	0	0	0	0	0	0	0	0	0	0	0	0	0	0	0	0	0	100	0	0	0	0	0	0	0	0	0	0	0	0	0	100	99.85	0	0	0	0	0	0	99.71	100
Cronobacter_malonaticus	heavy_metal_resistance	pCMA2	silS	0	0	0	0	0	83.1	0	0	0	0	0	0	0	0	0	0	0	0	0	0	0	0	0	0	0	0	0	0	0	0	0	0	0	0	0	0	100	100	0	0	83.1	83.1	0	0	99.19	99.12
Cronobacter_malonaticus	heavy_metal_resistance	pCMA2	tgtA5_cluster_protein_2	0	0	0	0	0	0	89.28	89.28	0	89.28	0	0	0	0	0	90.33	0	0	88.05	0	0	0	0	0	0	0	0	0	0	0	0	0	0	0	0	0	100	100	0	0	0	0	0	0	0	0
Cronobacter_malonaticus	heavy_metal_resistance	pCMA2	type_II_toxin-antitoxin_system_RelE/ParE_family_toxin	0	0	0	0	0	94.83	0	0	0	0	0	0	0	0	0	100	0	0	0	0	0	0	0	0	0	0	0	0	0	0	0	0	0	0	0	0	100	100	0	0	94.83	94.83	0	0	0	0
Cronobacter_malonaticus	heavy_metal_resistance	pCMA2	type_II_toxin-antitoxin_system_VapC_family_toxin	0	0	0	0	0	98.08	0	0	0	0	0	0	0	0	0	98.56	0	0	0	0	0	0	0	0	0	0	0	0	0	0	0	0	0	0	0	0	100	100	0	0	98.08	98.08	0	0	0	0
Cronobacter_malonaticus	heavy_metal_resistance	pCMA2	type_I_toxin-antitoxin_system_Hok_family_toxin	0	0	85.53	0	85.53	98.74	100	100	85.53	100	0	0	0	0	0	100	0	100	100	85.53	0	0	100	100	100	100	100	100	100	100	100	100	100	100	0	0	100	98.74	100	77.78	100	100	77.78	100	100	100
Cronobacter_malonaticus	virulence_plasmid	p1	AAA_family_ATPase	0	0	0	0	0	0	0	0	0	0	0	0	0	0	0	0	0	0	0	0	0	0	100	100	100	100	100	100	100	100	100	100	100	100	100	100	0	0	100	100	100	100	100	100	100	100
Cronobacter_malonaticus	virulence_plasmid	p1	ABC_transporter_ATP-binding_protein	0	0	0	0	0	0	0	0	0	0	0	0	0	0	0	0	0	0	0	0	0	0	95.65	95.65	95.65	95.65	95.65	95.65	95.65	95.65	95.65	95.65	95.65	95.65	100	100	0	0	92.32	95.65	95.65	95.65	95.65	95.65	95.78	96.18
Cronobacter_malonaticus	virulence_plasmid	p1	ABC_transporter_substrate-binding_protein	0	0	0	0	0	0	0	0	0	0	0	0	0	0	0	0	0	0	0	0	0	0	98.21	98.21	98.21	98.21	98.21	98.21	98.21	98.21	98.21	98.21	98.21	98.21	100	100	0	0	98.21	98.71	98.71	98.71	98.71	98.61	98.41	98.41
Cronobacter_malonaticus	virulence_plasmid	p1	CpmJ_protein	0	0	0	0	0	0	0	0	0	0	0	0	0	0	0	0	0	0	0	0	0	0	99.08	99.08	99.08	99.08	99.08	99.08	99.08	99.08	99.08	99.08	99.08	99.08	100	100	0	0	98.71	98.34	98.34	98.34	98.34	98.9	99.26	99.08
Cronobacter_malonaticus	virulence_plasmid	p1	DMT_family_transporter	0	0	0	0	0	0	0	0	0	0	0	0	0	0	0	0	0	0	0	0	0	0	99.77	99.77	99.77	99.77	99.77	99.77	99.77	99.77	99.77	99.77	99.77	99.77	100	100	0	0	100	98.98	98.98	98.98	98.98	98.29	99.77	99.32
Cronobacter_malonaticus	virulence_plasmid	p1	DUF2534_family_protein	0	0	0	0	0	0	0	0	0	0	0	0	0	0	0	0	0	0	0	0	0	0	99.23	99.23	99.23	99.23	99.23	99.23	99.23	99.23	99.23	99.23	99.23	99.23	100	100	0	0	99.23	99.62	99.62	99.62	99.62	99.62	98.85	99.23
Cronobacter_malonaticus	virulence_plasmid	p1	GNAT_family_N-acetyltransferase	0	0	0	0	0	0	0	0	0	0	0	0	0	0	0	0	0	0	0	0	0	0	100	100	100	100	100	100	100	100	100	100	100	100	100	100	0	0	100	100	100	100	100	100	100	100
Cronobacter_malonaticus	virulence_plasmid	p1	GntR_family_transcriptional_regulator	0	0	0	0	0	0	0	0	0	0	0	0	0	0	0	0	0	0	0	0	0	0	96.53	96.53	96.53	96.53	96.53	96.53	96.53	96.53	96.53	96.53	96.53	96.53	100	100	0	0	97.22	97.5	97.5	97.5	97.5	97.22	97.64	96.53
Cronobacter_malonaticus	virulence_plasmid	p1	HAMP_domain-containing_protein	0	0	0	80.15	0	80.15	0	0	0	0	0	80.15	80.15	80.15	80.15	80.88	80.15	100	100	0	0	79.41	100	100	100	100	100	100	100	100	100	100	100	100	100	100	0	0	100	100	100	100	100	100	100	100
Cronobacter_malonaticus	virulence_plasmid	p1	LysR_family_transcriptional_regulator	0	0	0	0	0	0	0	0	0	0	0	0	0	0	0	0	0	0	0	0	0	0	99.56	99.56	99.56	99.56	99.56	99.56	99.56	99.56	99.56	99.56	99.56	99.56	100	100	0	0	100	99.78	99.78	99.78	99.78	99.33	98.78	99.89
Cronobacter_malonaticus	virulence_plasmid	p1	MBL_fold_hydrolase	0	0	0	0	0	0	0	0	0	0	0	0	0	0	0	0	0	0	0	0	0	0	96	96	96	96	96	96	96	96	96	96	96	96	100	100	0	0	96.38	98.5	98.5	98.5	98.5	96.88	97.38	99
Cronobacter_malonaticus	virulence_plasmid	p1	MFS_transporter	0	0	0	0	0	0	0	0	94.83	0	0	0	0	0	0	0	0	0	0	93.75	0	0	100	100	100	100	100	100	100	100	100	100	100	100	100	100	0	0	100	100	100	100	100	100	100	100
Cronobacter_malonaticus	virulence_plasmid	p1	MerR_family_transcriptional_regulator	0	0	0	0	0	0	0	0	0	0	0	0	0	0	0	0	0	0	0	0	0	0	99.33	99.33	99.33	99.33	99.33	99.33	99.33	99.33	99.33	99.33	99.33	99.33	100	100	0	0	99.33	99.87	99.87	99.87	99.87	99.46	99.46	99.33
Cronobacter_malonaticus	virulence_plasmid	p1	MipA/OmpV_family_protein	0	0	0	0	0	0	0	0	0	0	0	0	0	0	0	0	0	0	0	0	0	0	99.22	99.22	99.22	99.22	99.22	99.22	99.22	99.22	99.22	99.22	99.22	99.22	100	100	0	0	99.87	0	0	0	0	98.44	99.48	99.48
Cronobacter_malonaticus	virulence_plasmid	p1	NINE_protein	0	0	0	0	0	0	0	0	0	0	0	0	0	0	0	0	0	0	0	0	0	0	100	100	100	100	100	100	100	100	100	100	100	100	100	100	0	0	99.66	100	100	100	100	100	100	99.66
Cronobacter_malonaticus	virulence_plasmid	p1	NUDIX_domain-containing_protein	0	0	0	0	0	0	0	0	0	0	0	0	0	0	0	0	0	0	0	0	0	0	97.52	97.52	97.52	97.52	97.52	97.52	97.52	97.52	97.52	97.52	97.52	97.52	100	100	0	0	97.3	0	0	0	0	97.52	0	95.06
Cronobacter_malonaticus	virulence_plasmid	p1	PLP-dependent_aminotransferase_family_protein	0	0	0	0	0	0	0	0	0	0	0	0	0	0	0	0	0	0	0	0	0	0	98.65	98.65	98.65	98.65	98.65	98.65	98.65	98.65	98.65	98.65	98.65	98.65	100	100	0	0	100	99.1	99.03	99.03	99.1	97.15	99.63	98.5
Cronobacter_malonaticus	virulence_plasmid	p1	PTS_transporter_subunit_EIIC	0	0	0	0	0	0	0	0	0	0	0	0	0	0	0	0	0	0	0	0	0	0	98.89	98.89	98.89	98.89	98.89	98.89	98.89	98.89	98.89	98.89	98.89	98.89	100	99.93	0	0	97.86	97.96	97.89	97.89	97.96	97.86	97.64	98.67
Cronobacter_malonaticus	virulence_plasmid	p1	ParA_family_protein	0	0	0	0	0	0	0	0	0	0	0	0	0	0	0	0	0	0	0	0	0	0	96.92	96.92	96.92	96.92	96.92	96.92	96.92	96.92	96.92	96.92	96.92	96.92	100	100	0	0	0	96.58	96.58	96.58	96.58	96.58	97.34	96.92
Cronobacter_malonaticus	virulence_plasmid	p1	ParB/RepB/Spo0J_family_partition_protein	0	0	0	0	0	0	0	0	0	0	0	0	0	0	0	0	0	0	0	0	0	0	0	0	0	0	0	0	0	0	0	0	0	0	100	100	0	0	99.38	98.25	98.25	98.25	98.25	97.42	97.73	0
Cronobacter_malonaticus	virulence_plasmid	p1	Prolyl_endopeptidase	0	0	0	0	0	0	0	0	0	0	0	0	0	0	0	0	0	0	0	0	0	0	97.93	97.93	97.93	97.93	97.93	97.93	97.93	97.93	97.93	97.93	97.93	97.93	100	100	0	0	98.71	97.67	97.67	97.67	97.67	98.71	97.67	97.16
Cronobacter_malonaticus	virulence_plasmid	p1	RepB_family_plasmid_replication_initiator_protein	0	0	0	0	0	0	0	0	0	0	0	0	0	0	0	0	0	0	0	0	0	0	97.83	97.83	97.83	97.83	97.83	97.83	97.83	97.83	97.83	97.83	97.83	97.83	100	100	0	0	99.21	98.03	98.03	98.03	98.03	97.83	96.94	98.03
Cronobacter_malonaticus	virulence_plasmid	p1	SDR_family_oxidoreductase	0	0	0	0	0	0	0	0	0	0	0	0	0	0	0	0	0	0	0	0	0	0	95.56	95.56	95.56	95.56	95.56	95.56	95.56	95.56	95.56	95.56	95.56	95.56	100	100	0	0	100	95.12	95.12	95.12	95.12	94.63	95.56	97.78
Cronobacter_malonaticus	virulence_plasmid	p1	SMI1/KNR4_family_protein	0	0	0	0	0	0	0	0	0	0	0	0	0	0	0	0	0	0	0	0	0	0	98.85	98.85	98.85	98.85	98.85	98.85	98.85	98.85	98.85	98.85	98.85	98.85	100	100	0	0	98.85	99.62	99.62	99.62	99.62	99.04	100	98.85
Cronobacter_malonaticus	virulence_plasmid	p1	ShlB/FhaC/HecB_family_hemolysin_secretion/activation_protein	0	0	0	0	0	0	0	0	0	0	0	0	0	0	0	0	0	0	0	0	0	0	97.18	97.18	97.18	97.18	97.18	97.18	97.57	97.18	97.18	97.18	97.18	97.18	100	100	0	0	98.14	97.12	97.12	97.12	97.12	96.76	96.58	97.06
Cronobacter_malonaticus	virulence_plasmid	p1	SidA/IucD/PvdA_family_monooxygenase	0	0	0	0	0	0	0	0	0	0	0	0	0	0	0	0	0	0	0	0	0	0	98.41	98.41	98.41	98.41	98.41	98.41	98.41	98.41	98.41	98.41	98.41	98.41	100	100	0	0	97.74	96.37	96.37	96.37	96.37	97.66	98.41	98.34
Cronobacter_malonaticus	virulence_plasmid	p1	TetR/AcrR_family_transcriptional_regulator	0	0	0	0	0	0	0	0	0	0	0	0	0	0	0	0	0	0	0	0	0	0	95.61	95.61	95.61	95.61	95.61	95.61	95.61	95.61	95.61	95.61	95.61	95.61	100	100	0	0	94.76	94.09	94.09	94.09	94.09	94.76	95.1	90.71
Cronobacter_malonaticus	virulence_plasmid	p1	TetR_family_transcriptional_regulator	0	0	0	0	0	0	0	0	0	0	0	0	0	0	0	0	0	0	0	0	0	0	97.85	97.85	97.85	97.85	97.85	97.85	97.85	97.85	97.85	97.85	97.85	97.85	100	100	0	0	98.21	97.85	97.85	97.85	97.85	97.31	97.85	99.82
Cronobacter_malonaticus	virulence_plasmid	p1	TonB-dependent_siderophore_receptor	0	0	0	89.39	89.3	89.48	89.53	89.44	0	89.53	0	0	0	0	0	89.62	89.75	0	0	88.33	88.31	89.48	97.59	97.59	97.59	97.59	97.59	97.59	97.59	97.59	97.59	97.59	97.59	97.59	100	100	0	0	96.32	96.49	96.49	96.45	96.49	0	97.68	97.63
Cronobacter_malonaticus	virulence_plasmid	p1	VENN_motif_pre-toxin_domain-containing_protein	0	0	0	0	0	0	93.52	0	0	93.52	0	0	0	0	0	0	0	0	0	0	0	0	100	100	100	100	100	100	100	100	100	100	100	100	100	100	0	0	0	100	100	100	100	0	0	100
Cronobacter_malonaticus	virulence_plasmid	p1	YafY_family_transcriptional_regulator	0	0	0	0	0	0	0	0	0	0	0	0	0	0	0	0	0	0	0	0	0	0	98.28	98.28	98.28	98.28	100	98.28	100	98.28	98.28	100	98.28	98.28	100	100	0	0	100	98.71	98.71	98.71	98.71	98.99	98.14	99.57
Cronobacter_malonaticus	virulence_plasmid	p1	YmjA_family_protein	0	0	0	0	0	0	0	0	0	0	0	0	0	0	0	0	0	0	0	0	0	0	96.34	96.34	96.34	96.34	96.34	96.34	96.34	96.34	96.34	96.34	96.34	96.34	100	100	0	0	97.15	96.75	96.75	96.75	96.75	96.75	99.59	96.34
Cronobacter_malonaticus	virulence_plasmid	p1	acetyltransferase	0	0	0	0	0	0	90.57	0	0	0	0	0	0	0	0	0	0	0	0	0	0	0	99.05	99.05	99.05	99.05	100	99.05	99.05	100	99.05	99.05	99.05	99.05	100	100	0	0	100	98.31	98.31	98.31	98.31	100	97.15	99.05
Cronobacter_malonaticus	virulence_plasmid	p1	aerobactin_synthase_IucA	0	0	0	0	0	0	0	0	0	0	0	0	0	0	0	0	0	0	0	0	0	0	97.08	97.08	97.08	97.08	97.08	97.08	97.08	100	97.08	97.08	97.08	97.08	100	100	0	0	100	97.43	97.43	97.43	97.43	98.28	98.74	97.14
Cronobacter_malonaticus	virulence_plasmid	p1	alpha/beta_hydrolase	0	0	0	0	0	0	0	0	0	0	0	0	0	0	0	0	0	0	0	0	0	0	98.18	98.18	98.18	98.18	98.18	98.18	98.18	98.18	98.18	98.18	98.18	98.18	100	100	0	0	96.47	99.27	99.27	99.27	99.27	98.54	98.3	96.96
Cronobacter_malonaticus	virulence_plasmid	p1	amino_acid-binding_protein	0	0	0	0	0	0	0	0	0	0	0	0	0	0	0	0	0	0	0	0	0	0	98.25	98.25	98.25	98.25	98.25	98.25	98.25	98.25	98.25	98.25	98.25	98.25	100	100	0	0	96.99	98.5	98.5	98.5	98.5	98.75	98.75	97.74
Cronobacter_malonaticus	virulence_plasmid	p1	antibiotic_biosynthesis_monooxygenase	0	0	0	0	0	0	0	0	0	0	0	0	0	0	0	0	0	0	0	0	0	0	98.77	98.77	98.77	98.77	98.77	98.77	98.77	98.77	98.77	98.77	98.77	98.77	100	100	0	0	98.77	98.77	98.77	98.77	98.77	97.22	97.22	98.77
Cronobacter_malonaticus	virulence_plasmid	p1	arsC	0	0	0	0	0	0	0	0	0	0	0	0	0	0	0	0	0	0	0	0	0	0	99.51	99.51	99.51	99.51	99.51	99.51	99.51	99.51	99.51	99.51	99.51	99.51	100	100	0	0	99.51	99.51	99.51	99.51	99.51	99.75	99.51	99.75
Cronobacter_malonaticus	virulence_plasmid	p1	arsenic_transporter	0	0	0	0	0	0	0	0	0	0	0	0	0	0	0	0	0	0	0	0	0	0	99.3	99.3	99.3	99.3	99.3	99.3	99.3	99.3	99.3	99.3	99.3	99.3	100	100	0	0	100	99.53	99.53	99.53	99.53	98.44	99.14	99.45
Cronobacter_malonaticus	virulence_plasmid	p1	ascB	0	0	0	0	0	0	0	0	0	0	0	0	0	0	0	0	0	0	0	0	0	0	99.21	99.21	99.21	99.21	99.21	99.21	99.21	99.21	99.21	99.21	99.21	99.21	100	100	0	0	98.92	99.43	99.35	99.35	99.43	98.92	99.07	98.64
Cronobacter_malonaticus	virulence_plasmid	p1	autotransporter_domain-containing_protein	0	0	0	0	0	0	0	0	0	0	0	0	0	0	0	0	0	0	0	0	0	0	97.55	97.55	97.55	97.55	97.55	97.55	97.55	97.55	97.55	97.55	97.55	100	100	100	0	0	97.39	98.54	98.54	98.54	98.54	97.76	97.72	98.23
Cronobacter_malonaticus	virulence_plasmid	p1	bglF	0	0	0	0	0	0	0	0	0	0	0	0	0	0	0	0	0	0	0	0	0	0	98.87	98.87	98.87	98.87	98.87	98.87	98.87	98.87	98.87	98.87	98.87	98.87	100	99.95	0	0	100	97.42	97.42	97.42	97.42	98.12	98.33	97.31
Cronobacter_malonaticus	virulence_plasmid	p1	bglG	0	0	0	0	0	0	0	0	0	0	0	0	0	0	0	0	0	0	0	0	0	0	99.76	99.76	99.76	99.76	99.76	99.76	99.76	99.76	99.76	99.76	99.76	99.76	100	100	0	0	98.56	97.6	97.6	97.6	97.6	97.12	99.04	99.16
Cronobacter_malonaticus	virulence_plasmid	p1	copper-binding_protein_	0	0	0	0	0	0	0	0	0	0	0	0	0	0	0	0	0	0	0	0	0	0	98.91	98.91	98.91	98.91	98.91	98.91	98.91	98.91	98.91	98.91	98.91	98.91	100	99.78	0	0	98.91	99.56	99.56	99.56	99.56	99.56	99.35	98.69
Cronobacter_malonaticus	virulence_plasmid	p1	copper-sensitivity_protein_ScsB	0	0	0	0	0	0	0	0	0	0	0	0	0	0	0	0	0	0	0	0	0	0	98.42	98.42	98.42	98.42	98.42	98.42	98.42	98.42	98.42	98.42	98.42	98.42	100	100	0	0	97.83	97.48	97.43	97.43	97.48	98.66	97.73	97.38
Cronobacter_malonaticus	virulence_plasmid	p1	cupin_domain-containing_protein	0	0	76.68	0	0	0	0	0	0	0	0	0	0	0	0	0	0	0	0	77.01	77.01	0	98.4	98.4	98.4	98.4	98.4	98.4	98.4	98.4	98.4	98.4	98.4	98.4	100	99.91	0	0	98.4	98.93	98.93	98.93	98.93	98.4	97.68	98.57
Cronobacter_malonaticus	virulence_plasmid	p1	darcynin	0	0	0	0	0	0	0	0	0	0	0	0	0	0	0	0	0	0	0	0	0	0	95.95	95.95	95.95	95.95	95.95	95.95	95.95	95.95	95.95	95.95	95.95	95.95	100	100	0	0	96.88	99.38	99.38	99.38	99.38	95.95	96.26	96.57
Cronobacter_malonaticus	virulence_plasmid	p1	diguanylate_phosphodiesterase	0	0	0	0	0	0	0	0	0	0	0	0	0	0	0	0	0	0	0	0	0	0	99.34	99.34	99.34	99.34	99.34	99.34	99.34	99.34	99.34	99.34	99.34	99.34	100	100	0	0	98.81	99.84	99.84	99.84	99.84	98.85	98.93	98.44
Cronobacter_malonaticus	virulence_plasmid	p1	dihydrodipicolinate_synthase_family_protein	0	0	0	0	0	0	0	0	0	0	0	0	0	0	0	0	0	0	0	0	0	0	98.87	98.87	98.87	98.87	98.87	98.87	98.87	98.87	100	98.87	98.87	98.87	100	100	0	0	100	97.3	97.3	97.3	97.3	96.96	96.96	96.73
Cronobacter_malonaticus	virulence_plasmid	p1	drug:proton_antiporter/glyxolase	0	0	0	0	0	0	0	0	0	0	0	0	0	0	0	0	0	0	0	0	0	0	99.48	99.48	99.48	99.48	99.48	99.48	99.48	99.48	99.48	99.48	99.48	99.48	100	100	0	0	99.48	98.7	98.7	98.7	98.7	98.96	99.48	97.66
Cronobacter_malonaticus	virulence_plasmid	p1	dsbG	0	0	0	0	0	0	0	0	0	0	0	0	0	0	0	0	0	0	0	0	0	0	98.8	98.8	98.8	98.8	98.8	98.8	98.8	98.8	98.8	98.8	98.8	98.8	100	100	0	0	99.47	99.07	99.07	99.07	99.07	99.33	98.93	99.73
Cronobacter_malonaticus	virulence_plasmid	p1	efflux_RND_transporter_periplasmic_adaptor_subunit	0	0	0	0	0	0	0	0	0	0	0	0	0	0	0	0	0	0	0	0	0	0	99.65	99.65	99.65	99.65	99.65	99.65	99.65	99.65	99.65	99.65	99.65	99.65	100	100	0	0	98.78	0	0	0	0	99.65	99.74	98.87
Cronobacter_malonaticus	virulence_plasmid	p1	efflux_RND_transporter_permease_subunit	0	0	0	0	0	0	0	0	0	0	0	0	0	0	0	0	0	0	0	0	0	0	99.71	99.71	99.71	99.71	100	99.71	99.71	99.71	99.71	99.71	99.71	99.71	100	99.71	0	0	99.77	0	0	0	0	99.71	99.54	99.93
Cronobacter_malonaticus	virulence_plasmid	p1	exc2	0	0	0	0	0	0	0	0	0	0	0	0	0	0	0	0	0	0	0	0	0	0	99.5	99.5	99.5	99.5	99.5	99.5	99.5	99.5	99.5	99.5	99.5	99.5	100	100	0	0	99	99	99	99	99	99.25	99	99
Cronobacter_malonaticus	virulence_plasmid	p1	filamentous_hemagglutinin_N-terminal_domain-containing_protein	0	0	0	0	0	0	0	87.85	0	0	0	0	0	0	0	0	89.91	0	0	0	0	0	100	100	100	100	100	100	100	100	100	100	100	100	100	99.99	0	0	100	100	100	100	100	96.46	100	100
Cronobacter_malonaticus	virulence_plasmid	p1	glgX	0	0	0	0	0	0	0	0	0	0	0	0	0	0	0	0	0	0	0	0	0	0	99.08	99.08	99.08	99.08	99.08	99.08	99.08	99.08	99.08	99.08	99.08	99.08	100	100	0	0	99.47	99.04	99.04	99.04	100	98.55	98.84	98.55
Cronobacter_malonaticus	virulence_plasmid	p1	glutathione_S-transferase_family_protein	0	0	0	0	0	0	0	0	0	0	0	0	0	0	0	0	0	0	0	0	0	0	98.32	98.32	98.32	98.32	98.32	98.32	98.32	98.32	100	98.32	98.32	98.32	100	100	0	0	100	98.66	98.83	98.83	98.66	100	98.32	98.99
Cronobacter_malonaticus	virulence_plasmid	p1	guaD	0	0	0	0	0	0	0	0	0	0	0	0	0	0	0	0	0	0	0	0	0	0	97.96	97.96	97.96	97.96	97.96	97.96	97.96	97.96	97.96	97.96	97.96	97.96	100	100	0	0	97.09	98.98	98.98	98.98	98.98	98.04	100	100
Cronobacter_malonaticus	virulence_plasmid	p1	helix-turn-helix_transcriptional_regulator	0	0	0	0	0	0	0	0	0	0	0	0	0	0	0	0	88.06	88.06	88.06	0	0	0	98.93	98.93	98.93	98.93	98.93	98.93	98.93	98.93	98.93	98.93	98.93	98.93	100	100	0	0	98.58	97.87	97.87	97.87	97.87	99.29	99.64	98.58
Cronobacter_malonaticus	virulence_plasmid	p1	histidine_phosphatase_family_protein	0	0	0	0	0	0	0	0	0	0	0	0	0	0	0	0	0	0	0	0	0	0	100	100	100	100	100	100	100	100	100	100	100	100	100	100	0	0	100	95.67	95.67	95.67	95.67	0	95.02	92.28
Cronobacter_malonaticus	virulence_plasmid	p1	hypothetical_protein_1059	0	0	0	0	0	0	0	0	0	0	0	0	0	0	0	0	0	0	0	0	0	0	97.17	97.17	97.17	97.17	97.17	97.17	97.17	97.17	97.17	97.17	97.17	97.17	100	100	0	0	97.07	98.3	98.3	98.3	98.3	98.3	97.92	97.45
Cronobacter_malonaticus	virulence_plasmid	p1	hypothetical_protein_282	0	0	0	0	0	0	0	0	0	0	0	0	0	0	0	0	0	0	0	0	0	0	98.08	98.08	98.08	98.08	98.08	98.08	98.08	98.08	98.08	98.08	98.08	98.08	100	100	0	0	98.46	97.87	97.87	97.87	97.87	99.65	98.08	98.08
Cronobacter_malonaticus	virulence_plasmid	p1	hypothetical_protein_300	0	0	0	0	0	0	0	0	0	0	0	0	0	0	0	0	0	0	0	0	0	0	99.67	99.67	99.67	99.67	99.67	99.67	99.67	99.67	99.67	99.67	99.67	99.67	100	100	0	0	99.33	100	100	100	100	100	99.33	100
Cronobacter_malonaticus	virulence_plasmid	p1	hypothetical_protein_312	0	0	0	0	0	0	0	0	0	0	0	0	0	0	0	0	0	0	0	0	0	0	97.44	97.44	97.44	97.44	97.44	97.44	97.44	97.44	97.44	97.44	97.44	97.44	100	100	0	0	97.76	97.44	97.44	97.44	97.44	97.44	96.5	97.44
Cronobacter_malonaticus	virulence_plasmid	p1	hypothetical_protein_336	88.56	88.56	0	0	0	0	0	0	0	0	0	0	0	0	0	0	0	0	0	0	0	0	99.7	99.7	99.7	99.7	99.7	99.7	99.7	99.7	99.7	99.7	99.7	99.7	100	100	0	0	0	100	100	100	100	0	0	100
Cronobacter_malonaticus	virulence_plasmid	p1	hypothetical_protein_816	0	0	0	0	0	0	0	0	0	0	0	0	0	0	0	0	0	0	0	0	0	0	98.77	98.77	98.77	98.77	98.77	98.77	98.77	98.77	98.77	98.77	98.77	98.77	100	100	0	0	98.9	98.16	98.16	98.16	98.16	98.9	97.92	98.9
Cronobacter_malonaticus	virulence_plasmid	p1	hypothetical_protein_912	0	0	0	0	0	0	0	0	0	0	0	0	0	0	0	0	0	0	0	0	0	0	96.16	96.16	96.16	96.16	96.16	96.16	96.16	96.16	96.16	96.16	96.16	96.16	100	100	0	0	100	95.07	95.07	95.07	95.07	96.16	95.61	95.29
Cronobacter_malonaticus	virulence_plasmid	p1	hypothetical_protein_939	0	0	0	0	0	0	0	96.8	0	0	0	0	0	0	0	97.12	0	0	0	96.89	96.9	0	99.68	99.68	99.68	99.68	99.68	99.68	99.68	99.68	99.68	99.68	99.68	99.68	100	100	0	0	99.89	99.89	99.89	99.89	99.89	99.79	99.79	99.79
Cronobacter_malonaticus	virulence_plasmid	p1	iron_ABC_transporter_permease	0	0	0	0	0	0	0	0	0	0	0	0	0	0	0	0	0	0	0	0	0	0	96.54	96.54	96.54	96.54	96.54	96.54	96.54	96.54	96.54	96.54	96.54	96.54	100	100	0	0	100	96.45	96.45	96.45	96.45	97.02	96.64	96.64
Cronobacter_malonaticus	virulence_plasmid	p1	iucC	0	0	0	0	0	0	90.74	0	0	0	0	0	0	0	0	0	0	0	0	0	0	0	96.57	96.57	96.57	96.57	96.57	96.57	96.57	96.57	96.57	96.57	96.57	96.57	100	100	0	0	96.88	97.86	97.86	97.86	97.86	97.98	97.6	96.57
Cronobacter_malonaticus	virulence_plasmid	p1	metallophosphoesterases	0	0	0	0	0	0	0	0	0	0	0	0	0	0	0	0	0	0	0	0	0	0	98.52	98.52	98.52	98.52	98.52	98.52	98.52	98.52	98.52	98.52	98.52	98.52	100	100	0	0	100	98.92	98.92	98.92	98.92	99.46	97.17	96.77
Cronobacter_malonaticus	virulence_plasmid	p1	metalloregulator_ArsR/SmtB_family_transcription_factor	0	0	0	0	0	0	0	0	0	0	0	0	0	0	0	0	0	0	0	0	0	0	99.4	99.4	99.4	99.4	99.4	99.4	99.4	99.4	99.4	99.4	99.4	99.4	100	100	0	0	99.7	99.7	99.7	99.7	99.7	99.7	99.11	99.7
Cronobacter_malonaticus	virulence_plasmid	p1	methyl-accepting_chemotaxis_protein	0	0	0	0	0	0	0	0	0	0	0	0	0	0	0	0	0	0	0	0	0	0	97.18	97.18	97.18	97.18	97.18	97.18	97.18	97.18	97.18	97.18	97.18	97.18	100	100	0	0	98.49	98.49	98.49	98.49	98.49	99.28	98.92	99.33
Cronobacter_malonaticus	virulence_plasmid	p1	methyltransferase	0	0	0	0	0	0	0	0	0	0	0	0	0	0	0	0	0	0	0	0	0	0	99.32	99.32	99.32	99.32	99.32	99.32	99.32	99.32	99.32	99.32	99.32	99.32	100	99.9	0	0	98.25	99.13	99.13	99.13	99.13	99.32	99.22	98.54
Cronobacter_malonaticus	virulence_plasmid	p1	mgtA	0	0	0	0	0	0	0	0	0	0	0	0	0	0	0	0	0	0	0	0	0	0	97.83	97.83	97.83	97.83	97.83	97.83	97.83	97.83	97.83	97.83	97.83	97.83	100	100	0	0	100	98.01	98.01	98.01	98.01	98.49	100	98.31
Cronobacter_malonaticus	virulence_plasmid	p1	nuclear_transport_factor_2_family_protein	0	0	0	0	0	0	0	0	0	0	0	0	0	0	0	0	0	0	0	0	0	0	100	100	100	100	100	100	100	100	100	100	100	100	100	100	0	0	100	100	100	100	100	100	100	100
Cronobacter_malonaticus	virulence_plasmid	p1	phosphoglycerate_mutase	0	0	0	0	0	0	0	0	0	0	0	0	0	0	0	0	0	0	0	0	0	0	0	0	0	0	0	0	0	0	0	0	0	0	100	99.82	0	0	0	94.39	94.39	94.21	94.39	99.47	0	0
Cronobacter_malonaticus	virulence_plasmid	p1	response_regulator_transcription_factor	0	0	0	0	0	0	0	0	0	0	0	0	0	0	0	0	0	0	0	0	0	0	99.13	99.13	99.13	99.13	99.13	99.13	99.13	99.13	99.13	99.13	99.13	99.13	100	100	0	0	99.13	0	0	0	0	99.71	98.99	99.42
Cronobacter_malonaticus	virulence_plasmid	p1	rhomboid_protein	0	0	0	0	0	0	0	0	0	0	0	0	0	0	0	0	0	0	0	0	0	0	99.74	99.74	99.74	99.74	99.74	99.74	99.74	99.74	99.74	99.74	99.74	99.74	100	100	0	0	97.66	97.92	97.92	97.92	97.92	97.66	97.66	98.05
Cronobacter_malonaticus	virulence_plasmid	p1	sensor_domain-containing_diguanylate_cyclase	0	0	0	0	0	0	0	0	0	0	0	0	0	0	0	0	0	0	0	0	0	0	98.7	98.7	98.7	98.7	98.7	98.7	98.7	98.7	98.7	98.7	98.7	98.7	100	100	0	0	100	98.7	98.63	98.63	98.7	99.11	97.89	99.32
Cronobacter_malonaticus	virulence_plasmid	p1	siderophore-interacting_protein	0	0	0	0	0	0	0	0	0	0	0	0	0	0	0	0	0	0	0	0	0	0	96.14	96.14	96.14	96.14	96.14	96.14	96.14	96.14	96.14	96.14	96.14	96.14	100	100	0	0	100	96.38	96.38	96.38	96.38	96.38	96.48	96.02
Cronobacter_malonaticus	virulence_plasmid	p1	starvation-sensing_protein_RspA	0	0	0	0	0	0	0	0	0	0	0	0	0	0	0	0	0	0	0	0	0	0	100	100	100	100	100	100	100	100	100	100	100	100	100	100	0	0	100	100	100	100	100	100	100	100
Cronobacter_malonaticus	virulence_plasmid	p1	substrate-binding_domain-containing_protein	0	0	0	0	0	0	0	0	0	0	0	0	0	0	0	0	0	0	0	0	0	0	98.88	98.88	98.88	98.88	98.88	98.88	98.88	98.88	98.88	98.88	98.88	98.88	100	100	0	0	99.13	99.75	99.75	99.75	99.75	98.64	99.26	99.88
Cronobacter_malonaticus	virulence_plasmid	p1	thioredoxin_fold_domain-containing_protein	0	0	0	0	0	0	0	0	0	0	0	0	0	0	0	0	0	0	0	0	0	0	98.93	98.93	98.93	98.93	98.93	98.93	98.93	98.93	98.93	98.93	98.93	98.93	100	100	0	0	100	99.11	99.11	99.11	99.11	97.15	97.61	99.47
Cronobacter_malonaticus	virulence_plasmid	p1	transcriptional_regulator	0	0	0	0	0	0	0	0	0	0	0	0	0	0	0	0	0	0	0	0	0	0	99.21	99.21	99.21	99.21	100	99.21	99.21	99.21	99.21	99.21	99.21	99.21	100	100	0	0	100	97.98	97.98	97.98	97.98	97.87	97.31	97.19
Cronobacter_malonaticus	virulence_plasmid	p1	treY	0	0	0	0	0	0	0	0	0	0	0	0	0	0	0	0	0	0	0	0	0	0	99.13	99.13	99.13	99.13	99.13	99.13	99.13	99.13	99.13	99.13	99.13	99.13	100	100	0	0	100	99.8	99.8	99.8	99.8	98.7	99.01	98.58
Cronobacter_malonaticus	virulence_plasmid	p1	treZ	0	0	0	90.99	0	0	90.49	0	0	0	0	0	0	0	0	0	0	0	0	0	0	0	98.04	98.04	98.04	98.04	100	98.04	98.04	98.04	98.04	100	98.04	98.04	100	99.94	0	0	96.81	97.93	97.93	97.93	97.93	97.31	97.82	97.87
Cronobacter_malonaticus	virulence_plasmid	p1	two-component-system_connector_protein_AriR	0	0	0	0	0	0	0	0	0	0	0	0	0	0	0	0	0	0	0	0	0	0	99.64	99.64	99.64	99.64	99.64	99.64	99.64	99.64	99.64	99.64	99.64	99.64	100	100	0	0	98.92	99.28	99.28	99.28	99.28	100	100	98.57
Cronobacter_malonaticus	virulence_plasmid	p1	two-component-system_connector_protein_YcgZ	0	0	0	0	0	0	0	0	0	0	0	0	0	0	0	0	0	0	0	0	0	0	99.58	99.58	99.58	99.58	99.58	99.58	99.58	99.58	99.58	99.58	99.58	99.58	100	100	0	0	99.58	99.58	99.58	99.58	99.58	100	99.58	100
Cronobacter_malonaticus	virulence_plasmid	p1	two-component_sensor_histidine_kinase	0	0	0	0	0	0	0	0	0	0	0	0	0	0	0	0	0	0	0	0	0	0	99.92	99.92	99.92	99.92	99.92	99.92	99.92	99.92	99.92	99.92	99.92	99.92	100	100	0	0	99.41	0	0	0	0	99.92	100	99.58
Cronobacter_malonaticus	virulence_plasmid	p1	type_II_toxin-antitoxin_system_HipA_family_toxin	0	0	0	0	0	0	89.26	0	0	0	0	0	0	0	0	0	0	0	100	89.52	0	0	97.88	97.88	97.88	97.88	97.88	97.88	97.88	97.88	97.88	97.88	97.88	97.88	100	100	0	0	98.47	98.71	98.71	98.71	98.71	97.5	98.19	99.32
Cronobacter_malonaticus	virulence_plasmid	p1	type_VI_secretion_system_tube_protein_Hcp	0	0	0	0	0	0	0	0	0	0	0	0	0	0	0	0	0	0	0	0	0	0	100	100	100	100	100	100	100	100	100	100	100	100	100	100	0	0	100	99.79	99.79	99.79	99.79	100	99.79	99.79
Cronobacter_malonaticus	virulence_plasmid	p1	tyrosine-type_recombinase/integrase	0	0	0	0	0	0	0	0	0	0	0	0	0	0	0	0	0	0	0	0	0	0	99.19	99.19	99.19	99.19	99.19	99.19	99.19	99.19	99.19	99.19	99.19	99.19	100	100	0	0	98.16	97.56	97.56	97.56	97.56	95.63	100	98.88
Cronobacter_malonaticus	virulence_plasmid	p1	winged_helix-turn-helix_transcriptional_regulator	0	0	0	0	0	0	0	0	0	0	0	0	0	0	0	0	0	0	0	0	0	0	99.45	99.45	99.45	99.45	99.45	99.45	99.45	99.45	99.45	99.45	99.45	99.45	100	100	0	0	98.07	98.76	98.76	98.76	98.76	98.35	97.8	96.56
Cronobacter_malonaticus	virulence_plasmid	pCMA1	AAA_family_ATPase	0	0	0	0	0	0	0	0	0	0	0	0	0	0	0	0	0	0	0	0	0	0	100	100	100	100	100	100	100	100	100	100	100	100	100	100	0	0	100	100	100	100	100	100	100	100
Cronobacter_malonaticus	virulence_plasmid	pCMA1	ABC_transporter_ATP-binding_protein	0	0	0	0	0	0	0	0	0	0	0	0	0	0	0	0	0	0	0	0	0	0	95.65	95.65	95.65	95.65	95.65	95.65	95.65	95.65	95.65	95.65	95.65	95.65	100	100	0	0	92.32	95.65	95.65	95.65	95.65	95.65	95.78	96.18
Cronobacter_malonaticus	virulence_plasmid	pCMA1	ABC_transporter_substrate-binding_protein	0	0	0	0	0	0	0	0	0	0	0	0	0	0	0	0	0	0	0	0	0	0	98.21	98.21	98.21	98.21	98.21	98.21	98.21	98.21	98.21	98.21	98.21	98.21	100	100	0	0	98.21	98.71	98.71	98.71	98.71	98.61	98.41	98.41
Cronobacter_malonaticus	virulence_plasmid	pCMA1	CpmJ_protein	0	0	0	0	0	0	0	0	0	0	0	0	0	0	0	0	0	0	0	0	0	0	99.08	99.08	99.08	99.08	99.08	99.08	99.08	99.08	99.08	99.08	99.08	99.08	100	100	0	0	98.71	98.34	98.34	98.34	98.34	98.9	99.26	99.08
Cronobacter_malonaticus	virulence_plasmid	pCMA1	DMT_family_transporter	0	0	0	0	0	0	0	0	0	0	0	0	0	0	0	0	0	0	0	0	0	0	99.77	99.77	99.77	99.77	99.77	99.77	99.77	99.77	99.77	99.77	99.77	99.77	100	100	0	0	100	98.98	98.98	98.98	98.98	98.29	99.77	99.32
Cronobacter_malonaticus	virulence_plasmid	pCMA1	DUF2534_family_protein	0	0	0	0	0	0	0	0	0	0	0	0	0	0	0	0	0	0	0	0	0	0	99.23	99.23	99.23	99.23	99.23	99.23	99.23	99.23	99.23	99.23	99.23	99.23	100	100	0	0	99.23	99.62	99.62	99.62	99.62	99.62	98.85	99.23
Cronobacter_malonaticus	virulence_plasmid	pCMA1	GNAT_family_N-acetyltransferase	0	0	0	0	0	0	0	0	0	0	0	0	0	0	0	0	0	0	0	0	0	0	100	100	100	100	100	100	100	100	100	100	100	100	100	100	0	0	100	100	100	100	100	100	100	100
Cronobacter_malonaticus	virulence_plasmid	pCMA1	GntR_family_transcriptional_regulator	0	0	0	0	0	0	0	0	0	0	0	0	0	0	0	0	0	0	0	0	0	0	96.53	96.53	96.53	96.53	96.53	96.53	96.53	96.53	96.53	96.53	96.53	96.53	100	100	0	0	97.22	97.5	97.5	97.5	97.5	97.22	97.64	96.53
Cronobacter_malonaticus	virulence_plasmid	pCMA1	HAMP_domain-containing_protein	0	0	0	80.15	0	80.15	0	0	0	0	0	80.15	80.15	80.15	80.15	80.88	80.15	100	100	0	0	79.41	100	100	100	100	100	100	100	100	100	100	100	100	100	100	0	0	100	100	100	100	100	100	100	100
Cronobacter_malonaticus	virulence_plasmid	pCMA1	LysR_family_transcriptional_regulator	0	0	0	0	0	0	0	0	0	0	0	0	0	0	0	0	0	0	0	0	0	0	99.56	99.56	99.56	99.56	99.56	99.56	99.56	99.56	99.56	99.56	99.56	99.56	100	100	0	0	100	99.78	99.78	99.78	99.78	99.33	98.78	99.89
Cronobacter_malonaticus	virulence_plasmid	pCMA1	MBL_fold_hydrolase	0	0	0	0	0	0	0	0	0	0	0	0	0	0	0	0	0	0	0	0	0	0	96	96	96	96	96	96	96	96	96	96	96	96	100	100	0	0	96.38	98.5	98.5	98.5	98.5	96.88	97.38	99
Cronobacter_malonaticus	virulence_plasmid	pCMA1	MFS_transporter	0	0	0	0	0	0	0	0	94.83	0	0	0	0	0	0	0	0	0	0	93.75	0	0	100	100	100	100	100	100	100	100	100	100	100	100	100	100	0	0	100	100	100	100	100	100	100	100
Cronobacter_malonaticus	virulence_plasmid	pCMA1	MerR_family_transcriptional_regulator	0	0	0	0	0	0	0	0	0	0	0	0	0	0	0	0	0	0	0	0	0	0	99.33	99.33	99.33	99.33	99.33	99.33	99.33	99.33	99.33	99.33	99.33	99.33	100	100	0	0	99.33	99.87	99.87	99.87	99.87	99.46	99.46	99.33
Cronobacter_malonaticus	virulence_plasmid	pCMA1	MipA/OmpV_family_protein	0	0	0	0	0	0	0	0	0	0	0	0	0	0	0	0	0	0	0	0	0	0	99.22	99.22	99.22	99.22	99.22	99.22	99.22	99.22	99.22	99.22	99.22	99.22	100	100	0	0	99.87	0	0	0	0	98.44	99.48	99.48
Cronobacter_malonaticus	virulence_plasmid	pCMA1	NINE_protein	0	0	0	0	0	0	0	0	0	0	0	0	0	0	0	0	0	0	0	0	0	0	100	100	100	100	100	100	100	100	100	100	100	100	100	100	0	0	99.66	100	100	100	100	100	100	99.66
Cronobacter_malonaticus	virulence_plasmid	pCMA1	NUDIX_domain-containing_protein	0	0	0	0	0	0	0	0	0	0	0	0	0	0	0	0	0	0	0	0	0	0	97.52	97.52	97.52	97.52	97.52	97.52	97.52	97.52	97.52	97.52	97.52	97.52	100	100	0	0	97.3	0	0	0	0	97.52	0	95.06
Cronobacter_malonaticus	virulence_plasmid	pCMA1	PLP-dependent_aminotransferase_family_protein	0	0	0	0	0	0	0	0	0	0	0	0	0	0	0	0	0	0	0	0	0	0	98.65	98.65	98.65	98.65	98.65	98.65	98.65	98.65	98.65	98.65	98.65	98.65	100	100	0	0	100	99.1	99.03	99.03	99.1	97.15	99.63	98.5
Cronobacter_malonaticus	virulence_plasmid	pCMA1	PTS_transporter_subunit_EIIC	0	0	0	0	0	0	0	0	0	0	0	0	0	0	0	0	0	0	0	0	0	0	98.97	98.97	98.97	98.97	98.97	98.97	98.97	98.97	98.97	98.97	98.97	98.97	99.93	100	0	0	97.79	98.03	97.96	97.96	98.03	97.94	97.72	98.75
Cronobacter_malonaticus	virulence_plasmid	pCMA1	ParA_family_protein	0	0	0	0	0	0	0	0	0	0	0	0	0	0	0	0	0	0	0	0	0	0	96.92	96.92	96.92	96.92	96.92	96.92	96.92	96.92	96.92	96.92	96.92	96.92	100	100	0	0	0	96.58	96.58	96.58	96.58	96.58	97.34	96.92
Cronobacter_malonaticus	virulence_plasmid	pCMA1	ParB/RepB/Spo0J_family_partition_protein	0	0	0	0	0	0	0	0	0	0	0	0	0	0	0	0	0	0	0	0	0	0	0	0	0	0	0	0	0	0	0	0	0	0	100	100	0	0	99.38	98.25	98.25	98.25	98.25	97.42	97.73	0
Cronobacter_malonaticus	virulence_plasmid	pCMA1	Prolyl_endopeptidase	0	0	0	0	0	0	0	0	0	0	0	0	0	0	0	0	0	0	0	0	0	0	97.93	97.93	97.93	97.93	97.93	97.93	97.93	97.93	97.93	97.93	97.93	97.93	100	100	0	0	98.71	97.67	97.67	97.67	97.67	98.71	97.67	97.16
Cronobacter_malonaticus	virulence_plasmid	pCMA1	RepB_family_plasmid_replication_initiator_protein	0	0	0	0	0	0	0	0	0	0	0	0	0	0	0	0	0	0	0	0	0	0	97.83	97.83	97.83	97.83	97.83	97.83	97.83	97.83	97.83	97.83	97.83	97.83	100	100	0	0	99.21	98.03	98.03	98.03	98.03	97.83	96.94	98.03
Cronobacter_malonaticus	virulence_plasmid	pCMA1	SDR_family_oxidoreductase	0	0	0	0	0	0	0	0	0	0	0	0	0	0	0	0	0	0	0	0	0	0	95.56	95.56	95.56	95.56	95.56	95.56	95.56	95.56	95.56	95.56	95.56	95.56	100	100	0	0	100	95.12	95.12	95.12	95.12	94.63	95.56	97.78
Cronobacter_malonaticus	virulence_plasmid	pCMA1	SMI1/KNR4_family_protein	0	0	0	0	0	0	0	0	0	0	0	0	0	0	0	0	0	0	0	0	0	0	98.85	98.85	98.85	98.85	98.85	98.85	98.85	98.85	98.85	98.85	98.85	98.85	100	100	0	0	98.85	99.62	99.62	99.62	99.62	99.04	100	98.85
Cronobacter_malonaticus	virulence_plasmid	pCMA1	ShlA/HecA/FhaA_protein	0	0	0	0	0	0	0	87.85	0	0	0	0	0	0	0	0	89.91	0	0	0	0	0	100	100	100	100	100	100	100	100	100	100	100	100	99.99	100	0	0	100	100	100	100	100	95.54	100	100
Cronobacter_malonaticus	virulence_plasmid	pCMA1	ShlB/FhaC/HecB_family_hemolysin_secretion/activation_protein	0	0	0	0	0	0	0	0	0	0	0	0	0	0	0	0	0	0	0	0	0	0	97.18	97.18	97.18	97.18	97.18	97.18	97.57	97.18	97.18	97.18	97.18	97.18	100	100	0	0	98.14	97.12	97.12	97.12	97.12	96.76	96.58	97.06
Cronobacter_malonaticus	virulence_plasmid	pCMA1	SidA/IucD/PvdA_family_monooxygenase	0	0	0	0	0	0	0	0	0	0	0	0	0	0	0	0	0	0	0	0	0	0	98.41	98.41	98.41	98.41	98.41	98.41	98.41	98.41	98.41	98.41	98.41	98.41	100	100	0	0	97.74	96.37	96.37	96.37	96.37	97.66	98.41	98.34
Cronobacter_malonaticus	virulence_plasmid	pCMA1	TetR/AcrR_family_transcriptional_regulator	0	0	0	0	0	0	0	0	0	0	0	0	0	0	0	0	0	0	0	0	0	0	95.61	95.61	95.61	95.61	95.61	95.61	95.61	95.61	95.61	95.61	95.61	95.61	100	100	0	0	94.76	94.09	94.09	94.09	94.09	94.76	95.1	90.71
Cronobacter_malonaticus	virulence_plasmid	pCMA1	TetR_family_transcriptional_regulator	0	0	0	0	0	0	0	0	0	0	0	0	0	0	0	0	0	0	0	0	0	0	97.85	97.85	97.85	97.85	97.85	97.85	97.85	97.85	97.85	97.85	97.85	97.85	100	100	0	0	98.21	97.85	97.85	97.85	97.85	97.31	97.85	99.82
Cronobacter_malonaticus	virulence_plasmid	pCMA1	TonB-dependent_siderophore_receptor	0	0	0	89.39	89.3	89.48	89.53	89.44	0	89.53	0	0	0	0	0	89.62	89.75	0	0	88.33	88.31	89.48	97.59	97.59	97.59	97.59	97.59	97.59	97.59	97.59	97.59	97.59	97.59	97.59	100	100	0	0	96.32	96.49	96.49	96.45	96.49	0	97.68	97.63
Cronobacter_malonaticus	virulence_plasmid	pCMA1	VENN_motif_pre-toxin_domain-containing_protein	0	0	0	0	0	0	93.52	0	0	93.52	0	0	0	0	0	0	0	0	0	0	0	0	100	100	100	100	100	100	100	100	100	100	100	100	100	100	0	0	0	100	100	100	100	0	0	100
Cronobacter_malonaticus	virulence_plasmid	pCMA1	YafY_family_transcriptional_regulator	0	0	0	0	0	0	0	0	0	0	0	0	0	0	0	0	0	0	0	0	0	0	98.28	98.28	98.28	98.28	100	98.28	100	98.28	98.28	100	98.28	98.28	100	100	0	0	100	98.71	98.71	98.71	98.71	98.99	98.14	99.57
Cronobacter_malonaticus	virulence_plasmid	pCMA1	YmjA_family_protein	0	0	0	0	0	0	0	0	0	0	0	0	0	0	0	0	0	0	0	0	0	0	96.34	96.34	96.34	96.34	96.34	96.34	96.34	96.34	96.34	96.34	96.34	96.34	100	100	0	0	97.15	96.75	96.75	96.75	96.75	96.75	99.59	96.34
Cronobacter_malonaticus	virulence_plasmid	pCMA1	acetyltransferase	0	0	0	0	0	0	90.57	0	0	0	0	0	0	0	0	0	0	0	0	0	0	0	99.05	99.05	99.05	99.05	100	99.05	99.05	100	99.05	99.05	99.05	99.05	100	100	0	0	100	98.31	98.31	98.31	98.31	100	97.15	99.05
Cronobacter_malonaticus	virulence_plasmid	pCMA1	aerobactin_synthase_IucA	0	0	0	0	0	0	0	0	0	0	0	0	0	0	0	0	0	0	0	0	0	0	97.08	97.08	97.08	97.08	97.08	97.08	97.08	100	97.08	97.08	97.08	97.08	100	100	0	0	100	97.43	97.43	97.43	97.43	98.28	98.74	97.14
Cronobacter_malonaticus	virulence_plasmid	pCMA1	alpha/beta_hydrolase	0	0	0	0	0	0	0	0	0	0	0	0	0	0	0	0	0	0	0	0	0	0	98.18	98.18	98.18	98.18	98.18	98.18	98.18	98.18	98.18	98.18	98.18	98.18	100	100	0	0	96.47	99.27	99.27	99.27	99.27	98.54	98.3	96.96
Cronobacter_malonaticus	virulence_plasmid	pCMA1	amino_acid-binding_protein	0	0	0	0	0	0	0	0	0	0	0	0	0	0	0	0	0	0	0	0	0	0	98.25	98.25	98.25	98.25	98.25	98.25	98.25	98.25	98.25	98.25	98.25	98.25	100	100	0	0	96.99	98.5	98.5	98.5	98.5	98.75	98.75	97.74
Cronobacter_malonaticus	virulence_plasmid	pCMA1	antibiotic_biosynthesis_monooxygenase	0	0	0	0	0	0	0	0	0	0	0	0	0	0	0	0	0	0	0	0	0	0	98.77	98.77	98.77	98.77	98.77	98.77	98.77	98.77	98.77	98.77	98.77	98.77	100	100	0	0	98.77	98.77	98.77	98.77	98.77	97.22	97.22	98.77
Cronobacter_malonaticus	virulence_plasmid	pCMA1	arsC	0	0	0	0	0	0	0	0	0	0	0	0	0	0	0	0	0	0	0	0	0	0	99.51	99.51	99.51	99.51	99.51	99.51	99.51	99.51	99.51	99.51	99.51	99.51	100	100	0	0	99.51	99.51	99.51	99.51	99.51	99.75	99.51	99.75
Cronobacter_malonaticus	virulence_plasmid	pCMA1	arsenic_transporter	0	0	0	0	0	0	0	0	0	0	0	0	0	0	0	0	0	0	0	0	0	0	99.3	99.3	99.3	99.3	99.3	99.3	99.3	99.3	99.3	99.3	99.3	99.3	100	100	0	0	100	99.53	99.53	99.53	99.53	98.44	99.14	99.45
Cronobacter_malonaticus	virulence_plasmid	pCMA1	ascB	0	0	0	0	0	0	0	0	0	0	0	0	0	0	0	0	0	0	0	0	0	0	99.21	99.21	99.21	99.21	99.21	99.21	99.21	99.21	99.21	99.21	99.21	99.21	100	100	0	0	98.92	99.43	99.35	99.35	99.43	98.92	99.07	98.64
Cronobacter_malonaticus	virulence_plasmid	pCMA1	autotransporter_domain-containing_protein	0	0	0	0	0	0	0	0	0	0	0	0	0	0	0	0	0	0	0	0	0	0	97.55	97.55	97.55	97.55	97.55	97.55	97.55	97.55	97.55	97.55	97.55	100	100	100	0	0	97.39	98.54	98.54	98.54	98.54	97.76	97.72	98.23
Cronobacter_malonaticus	virulence_plasmid	pCMA1	bglF	0	0	0	0	0	0	0	0	0	0	0	0	0	0	0	0	0	0	0	0	0	0	98.82	98.82	98.82	98.82	98.82	98.82	98.82	98.82	98.82	98.82	98.82	98.82	99.95	100	0	0	100	97.37	97.37	97.37	97.37	98.06	98.28	97.26
Cronobacter_malonaticus	virulence_plasmid	pCMA1	bglG	0	0	0	0	0	0	0	0	0	0	0	0	0	0	0	0	0	0	0	0	0	0	99.76	99.76	99.76	99.76	99.76	99.76	99.76	99.76	99.76	99.76	99.76	99.76	100	100	0	0	98.56	97.6	97.6	97.6	97.6	97.12	99.04	99.16
Cronobacter_malonaticus	virulence_plasmid	pCMA1	copper-binding_protein	0	0	0	0	0	0	0	0	0	0	0	0	0	0	0	0	0	0	0	0	0	0	99.13	99.13	99.13	99.13	99.13	99.13	99.13	99.13	99.13	99.13	99.13	99.13	99.78	100	0	0	99.13	99.78	99.78	99.78	99.78	99.78	99.56	98.91
Cronobacter_malonaticus	virulence_plasmid	pCMA1	copper_resistance_protein	0	0	0	0	0	0	0	0	0	0	0	0	0	0	0	0	0	0	0	0	0	0	98.42	98.42	98.42	98.42	98.42	98.42	98.42	98.42	98.42	98.42	98.42	98.42	100	100	0	0	97.83	97.48	97.43	97.43	97.48	98.66	97.73	97.38
Cronobacter_malonaticus	virulence_plasmid	pCMA1	cupin_domain-containing_protein	0	0	76.52	0	0	0	0	0	0	0	0	0	0	0	0	0	0	0	0	76.85	76.85	0	98.31	98.31	98.31	98.31	98.31	98.31	98.31	98.31	98.31	98.31	98.31	98.31	99.91	100	0	0	98.31	98.84	98.84	98.84	98.84	98.31	97.59	98.48
Cronobacter_malonaticus	virulence_plasmid	pCMA1	darcynin	0	0	0	0	0	0	0	0	0	0	0	0	0	0	0	0	0	0	0	0	0	0	95.95	95.95	95.95	95.95	95.95	95.95	95.95	95.95	95.95	95.95	95.95	95.95	100	100	0	0	96.88	99.38	99.38	99.38	99.38	95.95	96.26	96.57
Cronobacter_malonaticus	virulence_plasmid	pCMA1	diguanylate_phosphodiesterase	0	0	0	0	0	0	0	0	0	0	0	0	0	0	0	0	0	0	0	0	0	0	99.34	99.34	99.34	99.34	99.34	99.34	99.34	99.34	99.34	99.34	99.34	99.34	100	100	0	0	98.81	99.84	99.84	99.84	99.84	98.85	98.93	98.44
Cronobacter_malonaticus	virulence_plasmid	pCMA1	dihydrodipicolinate_synthase_family_protein	0	0	0	0	0	0	0	0	0	0	0	0	0	0	0	0	0	0	0	0	0	0	98.87	98.87	98.87	98.87	98.87	98.87	98.87	98.87	100	98.87	98.87	98.87	100	100	0	0	100	97.3	97.3	97.3	97.3	96.96	96.96	96.73
Cronobacter_malonaticus	virulence_plasmid	pCMA1	drug:proton_antiporter	0	0	0	0	0	0	0	0	0	0	0	0	0	0	0	0	0	0	0	0	0	0	99.48	99.48	99.48	99.48	99.48	99.48	99.48	99.48	99.48	99.48	99.48	99.48	100	100	0	0	99.48	98.7	98.7	98.7	98.7	98.96	99.48	97.66
Cronobacter_malonaticus	virulence_plasmid	pCMA1	dsbG	0	0	0	0	0	0	0	0	0	0	0	0	0	0	0	0	0	0	0	0	0	0	98.8	98.8	98.8	98.8	98.8	98.8	98.8	98.8	98.8	98.8	98.8	98.8	100	100	0	0	99.47	99.07	99.07	99.07	99.07	99.33	98.93	99.73
Cronobacter_malonaticus	virulence_plasmid	pCMA1	efflux_RND_transporter_periplasmic_adaptor_subunit	0	0	0	0	0	0	0	0	0	0	0	0	0	0	0	0	0	0	0	0	0	0	99.65	99.65	99.65	99.65	99.65	99.65	99.65	99.65	99.65	99.65	99.65	99.65	100	100	0	0	98.78	0	0	0	0	99.65	99.74	98.87
Cronobacter_malonaticus	virulence_plasmid	pCMA1	efflux_RND_transporter_permease_subunit	0	0	0	0	0	0	0	0	0	0	0	0	0	0	0	0	0	0	0	0	0	0	99.41	99.41	99.41	99.41	100	99.41	99.41	99.41	99.41	99.41	99.41	99.41	99.71	100	0	0	99.48	0	0	0	0	99.41	99.25	99.64
Cronobacter_malonaticus	virulence_plasmid	pCMA1	exc2	0	0	0	0	0	0	0	0	0	0	0	0	0	0	0	0	0	0	0	0	0	0	99.5	99.5	99.5	99.5	99.5	99.5	99.5	99.5	99.5	99.5	99.5	99.5	100	100	0	0	99	99	99	99	99	99.25	99	99
Cronobacter_malonaticus	virulence_plasmid	pCMA1	filamentous_hemagglutinin_N-terminal_domain-containing_protein	0	0	0	0	0	0	0	0	0	0	0	0	0	0	0	0	0	0	0	0	0	0	95.8	95.8	95.8	95.8	95.8	95.8	95.8	95.8	95.8	95.8	95.8	95.8	99.98	100	0	0	100	95.78	95.78	95.78	95.78	96.86	100	95.83
Cronobacter_malonaticus	virulence_plasmid	pCMA1	glgX	0	0	0	0	0	0	0	0	0	0	0	0	0	0	0	0	0	0	0	0	0	0	99.08	99.08	99.08	99.08	99.08	99.08	99.08	99.08	99.08	99.08	99.08	99.08	100	100	0	0	99.47	99.04	99.04	99.04	100	98.55	98.84	98.55
Cronobacter_malonaticus	virulence_plasmid	pCMA1	glutathione_S-transferase_family_protein	0	0	0	0	0	0	0	0	0	0	0	0	0	0	0	0	0	0	0	0	0	0	98.32	98.32	98.32	98.32	98.32	98.32	98.32	98.32	100	98.32	98.32	98.32	100	100	0	0	100	98.66	98.83	98.83	98.66	100	98.32	98.99
Cronobacter_malonaticus	virulence_plasmid	pCMA1	guaD	0	0	0	0	0	0	0	0	0	0	0	0	0	0	0	0	0	0	0	0	0	0	97.96	97.96	97.96	97.96	97.96	97.96	97.96	97.96	97.96	97.96	97.96	97.96	100	100	0	0	97.09	98.98	98.98	98.98	98.98	98.04	100	100
Cronobacter_malonaticus	virulence_plasmid	pCMA1	helix-turn-helix_transcriptional_regulator	0	0	0	0	0	0	0	0	0	0	0	0	0	0	0	0	88.06	88.06	88.06	0	0	0	98.93	98.93	98.93	98.93	98.93	98.93	98.93	98.93	98.93	98.93	98.93	98.93	100	100	0	0	98.58	97.87	97.87	97.87	97.87	99.29	99.64	98.58
Cronobacter_malonaticus	virulence_plasmid	pCMA1	histidine_phosphatase_family_protein	0	0	0	0	0	0	0	0	0	0	0	0	0	0	0	0	0	0	0	0	0	0	100	100	100	100	100	100	100	100	100	100	100	100	100	100	0	0	100	95.67	95.67	95.67	95.67	0	95.02	92.28
Cronobacter_malonaticus	virulence_plasmid	pCMA1	hypothetical_protein_1059	0	0	0	0	0	0	0	0	0	0	0	0	0	0	0	0	0	0	0	0	0	0	97.17	97.17	97.17	97.17	97.17	97.17	97.17	97.17	97.17	97.17	97.17	97.17	100	100	0	0	97.07	98.3	98.3	98.3	98.3	98.3	97.92	97.45
Cronobacter_malonaticus	virulence_plasmid	pCMA1	hypothetical_protein_282	0	0	0	0	0	0	0	0	0	0	0	0	0	0	0	0	0	0	0	0	0	0	98.08	98.08	98.08	98.08	98.08	98.08	98.08	98.08	98.08	98.08	98.08	98.08	100	100	0	0	98.46	97.87	97.87	97.87	97.87	99.65	98.08	98.08
Cronobacter_malonaticus	virulence_plasmid	pCMA1	hypothetical_protein_300	0	0	0	0	0	0	0	0	0	0	0	0	0	0	0	0	0	0	0	0	0	0	99.67	99.67	99.67	99.67	99.67	99.67	99.67	99.67	99.67	99.67	99.67	99.67	100	100	0	0	99.33	100	100	100	100	100	99.33	100
Cronobacter_malonaticus	virulence_plasmid	pCMA1	hypothetical_protein_312	0	0	0	0	0	0	0	0	0	0	0	0	0	0	0	0	0	0	0	0	0	0	97.44	97.44	97.44	97.44	97.44	97.44	97.44	97.44	97.44	97.44	97.44	97.44	100	100	0	0	97.76	97.44	97.44	97.44	97.44	97.44	96.5	97.44
Cronobacter_malonaticus	virulence_plasmid	pCMA1	hypothetical_protein_336	88.56	88.56	0	0	0	0	0	0	0	0	0	0	0	0	0	0	0	0	0	0	0	0	99.7	99.7	99.7	99.7	99.7	99.7	99.7	99.7	99.7	99.7	99.7	99.7	100	100	0	0	0	100	100	100	100	0	0	100
Cronobacter_malonaticus	virulence_plasmid	pCMA1	hypothetical_protein_435	0	0	0	0	0	0	0	0	0	0	0	0	0	0	0	0	0	0	0	0	0	0	99.77	99.77	99.77	99.77	99.77	99.77	99.77	99.77	99.77	99.77	99.77	99.77	99.77	100	0	0	92.87	99.77	99.77	99.77	99.77	0	0	99.54
Cronobacter_malonaticus	virulence_plasmid	pCMA1	hypothetical_protein_816	0	0	0	0	0	0	0	0	0	0	0	0	0	0	0	0	0	0	0	0	0	0	98.77	98.77	98.77	98.77	98.77	98.77	98.77	98.77	98.77	98.77	98.77	98.77	100	100	0	0	98.9	98.16	98.16	98.16	98.16	98.9	97.92	98.9
Cronobacter_malonaticus	virulence_plasmid	pCMA1	hypothetical_protein_912	0	0	0	0	0	0	0	0	0	0	0	0	0	0	0	0	0	0	0	0	0	0	96.16	96.16	96.16	96.16	96.16	96.16	96.16	96.16	96.16	96.16	96.16	96.16	100	100	0	0	100	95.07	95.07	95.07	95.07	96.16	95.61	95.29
Cronobacter_malonaticus	virulence_plasmid	pCMA1	hypothetical_protein_939	0	0	0	0	0	0	0	96.8	0	0	0	0	0	0	0	97.12	0	0	0	96.89	96.9	0	99.68	99.68	99.68	99.68	99.68	99.68	99.68	99.68	99.68	99.68	99.68	99.68	100	100	0	0	99.89	99.89	99.89	99.89	99.89	99.79	99.79	99.79
Cronobacter_malonaticus	virulence_plasmid	pCMA1	iron_ABC_transporter_permease	0	0	0	0	0	0	0	0	0	0	0	0	0	0	0	0	0	0	0	0	0	0	96.54	96.54	96.54	96.54	96.54	96.54	96.54	96.54	96.54	96.54	96.54	96.54	100	100	0	0	100	96.45	96.45	96.45	96.45	97.02	96.64	96.64
Cronobacter_malonaticus	virulence_plasmid	pCMA1	iucC	0	0	0	0	0	0	90.74	0	0	0	0	0	0	0	0	0	0	0	0	0	0	0	96.57	96.57	96.57	96.57	96.57	96.57	96.57	96.57	96.57	96.57	96.57	96.57	100	100	0	0	96.88	97.86	97.86	97.86	97.86	97.98	97.6	96.57
Cronobacter_malonaticus	virulence_plasmid	pCMA1	metallophosphoesterase	0	0	0	0	0	0	0	0	0	0	0	0	0	0	0	0	0	0	0	0	0	0	98.52	98.52	98.52	98.52	98.52	98.52	98.52	98.52	98.52	98.52	98.52	98.52	100	100	0	0	100	98.92	98.92	98.92	98.92	99.46	97.17	96.77
Cronobacter_malonaticus	virulence_plasmid	pCMA1	metalloregulator_ArsR/SmtB_family_transcription_factor	0	0	0	0	0	0	0	0	0	0	0	0	0	0	0	0	0	0	0	0	0	0	99.4	99.4	99.4	99.4	99.4	99.4	99.4	99.4	99.4	99.4	99.4	99.4	100	100	0	0	99.7	99.7	99.7	99.7	99.7	99.7	99.11	99.7
Cronobacter_malonaticus	virulence_plasmid	pCMA1	methyl-accepting_chemotaxis_protein	0	0	0	0	0	0	0	0	0	0	0	0	0	0	0	0	0	0	0	0	0	0	97.18	97.18	97.18	97.18	97.18	97.18	97.18	97.18	97.18	97.18	97.18	97.18	100	100	0	0	98.49	98.49	98.49	98.49	98.49	99.28	98.92	99.33
Cronobacter_malonaticus	virulence_plasmid	pCMA1	methyltransferase	0	0	0	0	0	0	0	0	0	0	0	0	0	0	0	0	0	0	0	0	0	0	99.42	99.42	99.42	99.42	99.42	99.42	99.42	99.42	99.42	99.42	99.42	99.42	99.9	100	0	0	98.35	99.22	99.22	99.22	99.22	99.42	99.32	98.64
Cronobacter_malonaticus	virulence_plasmid	pCMA1	mgtA	0	0	0	0	0	0	0	0	0	0	0	0	0	0	0	0	0	0	0	0	0	0	97.83	97.83	97.83	97.83	97.83	97.83	97.83	97.83	97.83	97.83	97.83	97.83	100	100	0	0	100	98.01	98.01	98.01	98.01	98.49	100	98.31
Cronobacter_malonaticus	virulence_plasmid	pCMA1	nuclear_transport_factor_2_family_protein	0	0	0	0	0	0	0	0	0	0	0	0	0	0	0	0	0	0	0	0	0	0	100	100	100	100	100	100	100	100	100	100	100	100	100	100	0	0	100	100	100	100	100	100	100	100
Cronobacter_malonaticus	virulence_plasmid	pCMA1	phosphoglycerate_mutase	0	0	0	0	0	0	0	0	0	0	0	0	0	0	0	0	0	0	0	0	0	0	0	0	0	0	0	0	0	0	0	0	0	0	99.82	100	0	0	0	94.21	94.21	94.03	94.21	99.29	0	0
Cronobacter_malonaticus	virulence_plasmid	pCMA1	response_regulator_transcription_factor	0	0	0	0	0	0	0	0	0	0	0	0	0	0	0	0	0	0	0	0	0	0	99.13	99.13	99.13	99.13	99.13	99.13	99.13	99.13	99.13	99.13	99.13	99.13	100	100	0	0	99.13	0	0	0	0	99.71	98.99	99.42
Cronobacter_malonaticus	virulence_plasmid	pCMA1	rhomboid_protein	0	0	0	0	0	0	0	0	0	0	0	0	0	0	0	0	0	0	0	0	0	0	99.74	99.74	99.74	99.74	99.74	99.74	99.74	99.74	99.74	99.74	99.74	99.74	100	100	0	0	97.66	97.92	97.92	97.92	97.92	97.66	97.66	98.05
Cronobacter_malonaticus	virulence_plasmid	pCMA1	sensor_domain-containing_diguanylate_cyclase	0	0	0	0	0	0	0	0	0	0	0	0	0	0	0	0	0	0	0	0	0	0	98.7	98.7	98.7	98.7	98.7	98.7	98.7	98.7	98.7	98.7	98.7	98.7	100	100	0	0	100	98.7	98.63	98.63	98.7	99.11	97.89	99.32
Cronobacter_malonaticus	virulence_plasmid	pCMA1	siderophore-interacting_protein	0	0	0	0	0	0	0	0	0	0	0	0	0	0	0	0	0	0	0	0	0	0	96.14	96.14	96.14	96.14	96.14	96.14	96.14	96.14	96.14	96.14	96.14	96.14	100	100	0	0	100	96.38	96.38	96.38	96.38	96.38	96.48	96.02
Cronobacter_malonaticus	virulence_plasmid	pCMA1	starvation-sensing_protein_RspA	0	0	0	0	0	0	0	0	0	0	0	0	0	0	0	0	0	0	0	0	0	0	98.42	98.42	98.42	98.42	98.42	98.42	98.42	98.42	98.42	98.42	98.42	98.42	100	100	0	0	100	98.33	98.33	98.33	98.33	99.33	98.17	97.92
Cronobacter_malonaticus	virulence_plasmid	pCMA1	substrate-binding_domain-containing_protein	0	0	0	0	0	0	0	0	0	0	0	0	0	0	0	0	0	0	0	0	0	0	98.88	98.88	98.88	98.88	98.88	98.88	98.88	98.88	98.88	98.88	98.88	98.88	100	100	0	0	99.13	99.75	99.75	99.75	99.75	98.64	99.26	99.88
Cronobacter_malonaticus	virulence_plasmid	pCMA1	thioredoxin_fold_domain-containing_protein	0	0	0	0	0	0	0	0	0	0	0	0	0	0	0	0	0	0	0	0	0	0	98.93	98.93	98.93	98.93	98.93	98.93	98.93	98.93	98.93	98.93	98.93	98.93	100	100	0	0	100	99.11	99.11	99.11	99.11	97.15	97.61	99.47
Cronobacter_malonaticus	virulence_plasmid	pCMA1	transcriptional_regulator	0	0	0	0	0	0	0	0	0	0	0	0	0	0	0	0	0	0	0	0	0	0	99.21	99.21	99.21	99.21	100	99.21	99.21	99.21	99.21	99.21	99.21	99.21	100	100	0	0	100	97.98	97.98	97.98	97.98	97.87	97.31	97.19
Cronobacter_malonaticus	virulence_plasmid	pCMA1	treY	0	0	0	0	0	0	0	0	0	0	0	0	0	0	0	0	0	0	0	0	0	0	99.13	99.13	99.13	99.13	99.13	99.13	99.13	99.13	99.13	99.13	99.13	99.13	100	100	0	0	100	99.8	99.8	99.8	99.8	98.7	99.01	98.58
Cronobacter_malonaticus	virulence_plasmid	pCMA1	treZ	0	0	0	90.99	0	0	90.49	0	0	0	0	0	0	0	0	0	0	0	0	0	0	0	97.98	97.98	97.98	97.98	100	97.98	97.98	97.98	97.98	100	97.98	97.98	100	100	0	0	96.75	97.87	97.87	97.87	97.87	97.25	97.76	97.82
Cronobacter_malonaticus	virulence_plasmid	pCMA1	two-component-system_connector_protein_AriR	0	0	0	0	0	0	0	0	0	0	0	0	0	0	0	0	0	0	0	0	0	0	99.64	99.64	99.64	99.64	99.64	99.64	99.64	99.64	99.64	99.64	99.64	99.64	100	100	0	0	98.92	99.28	99.28	99.28	99.28	100	100	98.57
Cronobacter_malonaticus	virulence_plasmid	pCMA1	two-component-system_connector_protein_YcgZ	0	0	0	0	0	0	0	0	0	0	0	0	0	0	0	0	0	0	0	0	0	0	99.58	99.58	99.58	99.58	99.58	99.58	99.58	99.58	99.58	99.58	99.58	99.58	100	100	0	0	99.58	99.58	99.58	99.58	99.58	100	99.58	100
Cronobacter_malonaticus	virulence_plasmid	pCMA1	two-component_sensor_histidine_kinase	0	0	0	0	0	0	0	0	0	0	0	0	0	0	0	0	0	0	0	0	0	0	99.92	99.92	99.92	99.92	99.92	99.92	99.92	99.92	99.92	99.92	99.92	99.92	100	100	0	0	99.41	0	0	0	0	99.92	100	99.58
Cronobacter_malonaticus	virulence_plasmid	pCMA1	type_II_toxin-antitoxin_system_HipA_family_toxin	0	0	0	0	0	0	89.26	0	0	0	0	0	0	0	0	0	0	0	100	89.52	0	0	97.88	97.88	97.88	97.88	97.88	97.88	97.88	97.88	97.88	97.88	97.88	97.88	100	100	0	0	98.47	98.71	98.71	98.71	98.71	97.5	98.19	99.32
Cronobacter_malonaticus	virulence_plasmid	pCMA1	type_VI_secretion_system_tube_protein_Hcp	0	0	0	0	0	0	0	0	0	0	0	0	0	0	0	0	0	0	0	0	0	0	100	100	100	100	100	100	100	100	100	100	100	100	100	100	0	0	100	99.79	99.79	99.79	99.79	100	99.79	99.79
Cronobacter_malonaticus	virulence_plasmid	pCMA1	tyrosine-type_recombinase/integrase	0	0	0	0	0	0	0	0	0	0	0	0	0	0	0	0	0	0	0	0	0	0	99.19	99.19	99.19	99.19	99.19	99.19	99.19	99.19	99.19	99.19	99.19	99.19	100	100	0	0	98.16	97.56	97.56	97.56	97.56	95.63	100	98.88
Cronobacter_malonaticus	virulence_plasmid	pCMA1	winged_helix-turn-helix_transcriptional_regulator	0	0	0	0	0	0	0	0	0	0	0	0	0	0	0	0	0	0	0	0	0	0	99.45	99.45	99.45	99.45	99.45	99.45	99.45	99.45	99.45	99.45	99.45	99.45	100	100	0	0	98.07	98.76	98.76	98.76	98.76	98.35	97.8	96.56
Cronobacter_muytjensii	TBD	CmuyJZ38_p1	AAA	0	0	0	0	0	0	0	0	0	0	0	0	0	0	0	0	0	0	0	0	0	0	0	0	0	0	0	0	0	0	0	0	0	0	0	0	0	0	0	0	0	0	0	0	0	0
Cronobacter_muytjensii	TBD	CmuyJZ38_p1	ABC_transporter,_ATP-binding_protein	0	0	0	0	0	0	0	0	0	0	0	0	0	0	0	0	0	0	0	0	0	0	0	0	0	0	0	0	0	0	0	0	0	0	0	0	0	0	0	0	0	0	0	0	0	0
Cronobacter_muytjensii	TBD	CmuyJZ38_p1	Chromosome_partitioning_protein_ParA	0	0	0	0	0	0	0	0	0	0	0	0	0	0	0	0	0	0	0	0	0	0	0	0	0	0	0	0	0	0	0	0	0	0	0	0	0	0	0	0	0	0	0	0	0	0
Cronobacter_muytjensii	TBD	CmuyJZ38_p1	CobS-like_protein	0	0	0	0	0	0	0	0	0	0	0	0	0	0	0	0	0	0	0	0	0	0	0	0	0	0	0	0	0	0	0	0	0	0	0	0	0	0	0	0	0	0	0	0	0	0
Cronobacter_muytjensii	TBD	CmuyJZ38_p1	DNA	0	0	0	0	0	0	0	0	0	0	0	0	0	0	0	0	0	0	0	0	0	0	0	0	0	0	0	0	0	0	0	0	0	0	0	0	0	0	0	0	0	0	0	0	0	0
Cronobacter_muytjensii	TBD	CmuyJZ38_p1	DNA-binding	0	0	0	0	0	0	0	0	0	0	0	0	0	0	0	0	0	0	0	0	0	0	0	0	0	0	0	0	0	0	0	0	0	0	0	0	0	0	0	0	0	0	0	0	0	0
Cronobacter_muytjensii	TBD	CmuyJZ38_p1	DNA_modification_methylase	0	0	0	0	0	0	0	0	0	0	0	0	0	0	0	0	0	0	0	0	0	0	0	0	0	0	0	0	0	0	0	0	0	0	0	0	0	0	0	0	0	0	0	0	0	0
Cronobacter_muytjensii	TBD	CmuyJZ38_p1	DNA_polymerase_III_alpha_subunit_(EC_2.7.7.7)	0	0	0	0	0	0	0	0	0	0	0	0	0	0	0	0	0	0	0	0	0	0	0	0	0	0	0	0	0	0	0	0	0	0	0	0	0	0	0	0	0	0	0	0	0	0
Cronobacter_muytjensii	TBD	CmuyJZ38_p1	DNA_polymerase_III_epsilon_subunit_(EC_2.7.7.7)	0	0	0	0	0	0	0	0	0	0	0	0	0	0	0	0	0	0	0	0	0	0	0	0	0	0	0	0	0	0	0	0	0	0	0	0	0	0	0	0	0	0	0	0	0	0
Cronobacter_muytjensii	TBD	CmuyJZ38_p1	DNA_polymerase_I_5'-3'_exonuclease_domain	0	0	0	0	0	0	0	0	0	0	0	0	0	0	0	0	0	0	0	0	0	0	0	0	0	0	0	0	0	0	0	0	0	0	0	0	0	0	0	0	0	0	0	0	0	0
Cronobacter_muytjensii	TBD	CmuyJZ38_p1	DNA_replication_protein	0	0	0	0	0	0	0	0	0	0	0	0	0	0	0	0	0	0	0	0	0	0	0	0	0	0	0	0	0	0	0	0	0	0	0	0	0	0	0	0	0	0	0	0	0	0
Cronobacter_muytjensii	TBD	CmuyJZ38_p1	DUF1653	0	0	0	0	0	0	0	0	0	0	0	0	0	0	0	0	0	0	0	0	0	0	0	0	0	0	0	0	0	0	0	0	0	0	0	0	0	0	0	0	0	0	0	0	0	0
Cronobacter_muytjensii	TBD	CmuyJZ38_p1	DUF2829	0	0	0	0	0	0	0	0	0	0	0	0	0	0	0	0	0	0	0	0	0	0	0	0	0	0	0	0	0	0	0	0	0	0	0	0	0	0	0	0	0	0	0	0	0	0
Cronobacter_muytjensii	TBD	CmuyJZ38_p1	DUF3927	0	0	0	0	0	0	0	0	0	0	0	0	0	0	0	0	0	0	0	0	0	0	0	0	0	0	0	0	0	0	0	0	0	0	0	0	0	0	0	0	0	0	0	0	0	0
Cronobacter_muytjensii	TBD	CmuyJZ38_p1	DUF4942	0	0	0	0	0	0	0	0	0	0	0	0	0	0	0	0	0	0	0	0	0	0	0	0	0	0	0	0	0	0	0	0	0	0	0	0	0	0	0	0	0	0	0	0	0	0
Cronobacter_muytjensii	TBD	CmuyJZ38_p1	Dihydrofolate_reductase_(EC_1.5.1.3)	0	0	0	0	0	0	0	0	0	0	0	0	0	0	0	0	0	0	0	0	0	0	0	0	0	0	0	0	0	0	0	0	0	0	0	0	0	0	0	0	0	0	0	0	0	0
Cronobacter_muytjensii	TBD	CmuyJZ38_p1	Error-prone,_lesion_bypass_DNA_polymerase_V_(UmuC)	0	0	0	0	0	0	0	0	0	0	0	0	0	0	0	0	0	0	0	0	0	0	0	0	0	0	0	0	0	0	0	0	0	0	0	0	0	0	0	0	0	0	0	0	0	0
Cronobacter_muytjensii	TBD	CmuyJZ38_p1	FIG00925047:_hypothetical_protein_327	0	0	0	0	0	0	0	0	0	0	0	0	0	0	0	0	0	0	0	0	0	0	0	0	0	0	0	0	0	0	0	0	0	0	0	0	0	0	0	0	0	0	0	0	0	0
Cronobacter_muytjensii	TBD	CmuyJZ38_p1	FIG01048569:_hypothetical_protein_738	0	0	0	0	0	0	0	0	0	0	0	0	0	0	0	0	0	0	0	0	0	0	0	0	0	0	0	0	0	0	0	0	0	0	0	0	0	0	0	0	0	0	0	0	0	0
Cronobacter_muytjensii	TBD	CmuyJZ38_p1	FIG01049046:_AAA	0	0	0	0	0	0	0	0	0	0	0	0	0	0	0	0	0	0	0	0	0	0	0	0	0	0	0	0	0	0	0	0	0	0	0	0	0	0	0	0	0	0	0	0	0	0
Cronobacter_muytjensii	TBD	CmuyJZ38_p1	FIG01049711:_hypothetical_protein_810	0	0	0	0	0	0	0	0	0	0	0	0	0	0	0	0	0	0	0	0	0	0	0	0	0	0	0	0	0	0	0	0	0	0	0	0	0	0	0	0	0	0	0	0	0	0
Cronobacter_muytjensii	TBD	CmuyJZ38_p1	FIG01049758:_hypothetical_protein_282	0	0	0	0	0	0	0	0	0	0	0	0	0	0	0	0	0	0	0	0	0	0	0	0	0	0	0	0	0	0	0	0	0	0	0	0	0	0	0	0	0	0	0	0	0	0
Cronobacter_muytjensii	TBD	CmuyJZ38_p1	FIG01220079:_hypothetical_protein_645	0	0	0	0	0	0	0	0	0	0	0	0	0	0	0	0	0	0	0	0	0	0	0	0	0	0	0	0	0	0	0	0	0	0	0	0	0	0	0	0	0	0	0	0	0	0
Cronobacter_muytjensii	TBD	CmuyJZ38_p1	GrxA	0	0	0	0	0	0	0	0	0	0	0	0	0	0	0	0	0	0	0	0	0	0	0	0	0	0	0	0	0	0	0	0	0	0	0	0	0	0	0	0	0	0	0	0	0	0
Cronobacter_muytjensii	TBD	CmuyJZ38_p1	HD	0	0	0	0	0	0	0	0	0	0	0	0	0	0	0	0	0	0	0	0	0	0	0	0	0	0	0	0	0	0	0	0	0	0	0	0	0	0	0	0	0	0	0	0	0	0
Cronobacter_muytjensii	TBD	CmuyJZ38_p1	Ig	0	0	0	0	0	0	0	0	0	0	0	0	0	0	0	0	0	0	0	0	0	0	0	0	0	0	0	0	0	0	0	0	0	0	0	0	0	0	0	0	0	0	0	0	0	0
Cronobacter_muytjensii	TBD	CmuyJZ38_p1	Integrase	0	0	0	0	0	0	0	0	0	0	0	0	0	0	0	0	0	0	0	0	0	0	0	0	0	0	0	0	0	0	0	0	0	0	0	0	0	0	0	0	0	0	0	0	0	0
Cronobacter_muytjensii	TBD	CmuyJZ38_p1	ParB	0	0	0	0	0	0	0	0	0	0	0	0	0	0	0	0	0	0	0	0	0	0	0	0	0	0	0	0	0	0	0	0	0	0	0	0	0	0	0	0	0	0	0	0	0	0
Cronobacter_muytjensii	TBD	CmuyJZ38_p1	Phage_exonuclease	0	0	0	0	0	0	0	0	0	0	0	0	0	0	0	0	0	0	0	0	0	0	0	0	0	0	0	0	0	0	0	0	0	0	0	0	0	0	0	0	0	0	0	0	0	0
Cronobacter_muytjensii	TBD	CmuyJZ38_p1	Phage_recombination_related_exonuclease_(EC_3.1.11.-)	0	0	0	0	0	0	0	0	0	0	0	0	0	0	0	0	0	0	0	0	0	0	0	0	0	0	0	0	0	0	0	0	0	0	0	0	0	0	0	0	0	0	0	0	0	0
Cronobacter_muytjensii	TBD	CmuyJZ38_p1	Phage_tail_assembly_protein_I	0	0	0	0	0	0	0	0	0	0	0	0	0	0	0	0	0	0	0	0	0	0	0	0	0	0	0	0	0	0	0	0	0	0	0	0	0	0	0	0	0	0	0	0	0	0
Cronobacter_muytjensii	TBD	CmuyJZ38_p1	Phage_tail_tip,_assembly_protein_K	0	0	0	0	0	0	0	0	0	0	0	0	0	0	0	0	0	0	0	0	0	0	0	0	0	0	0	0	0	0	0	0	0	0	0	0	0	0	0	0	0	0	0	0	0	0
Cronobacter_muytjensii	TBD	CmuyJZ38_p1	Phage_tail_tip,_assembly_protein_L	0	0	0	0	0	0	0	0	0	0	0	0	0	0	0	0	0	0	0	0	0	0	0	0	0	0	0	0	0	0	0	0	0	0	0	0	0	0	0	0	0	0	0	0	0	0
Cronobacter_muytjensii	TBD	CmuyJZ38_p1	Phage_tail_tip,_host_specificity_protein_J	0	0	0	0	0	0	0	0	0	0	0	0	0	0	0	0	0	0	0	0	0	0	0	0	0	0	0	0	0	0	0	0	0	0	0	0	0	0	0	0	0	0	0	0	0	0
Cronobacter_muytjensii	TBD	CmuyJZ38_p1	Putative_helicase	0	0	0	0	0	0	0	0	0	0	0	0	0	0	0	0	0	0	0	0	0	0	0	0	0	0	0	0	0	0	0	0	0	0	0	0	0	0	0	0	0	0	0	0	0	0
Cronobacter_muytjensii	TBD	CmuyJZ38_p1	Putative_regulatory_protein	0	0	0	0	0	0	0	0	0	0	0	0	0	0	0	0	0	0	0	0	0	0	0	0	0	0	0	0	0	0	0	0	0	0	0	0	0	0	0	0	0	0	0	0	0	0
Cronobacter_muytjensii	TBD	CmuyJZ38_p1	RecA-like_protein	0	0	0	0	0	0	0	0	0	0	0	0	0	0	0	0	0	0	0	0	0	0	0	0	0	0	0	0	0	0	0	0	0	0	0	0	0	0	0	0	0	0	0	0	0	0
Cronobacter_muytjensii	TBD	CmuyJZ38_p1	Ribonucleotide_reductase_of_class_Ia_(aerobic),_alpha_subunit_(EC_1.17.4.1)	0	0	0	0	0	0	0	0	0	0	0	0	0	0	0	0	0	0	0	0	0	0	0	0	0	0	0	0	0	0	0	0	0	0	0	0	0	0	0	0	0	0	0	0	0	0
Cronobacter_muytjensii	TBD	CmuyJZ38_p1	Ribonucleotide_reductase_of_class_Ia_(aerobic),_beta_subunit_(EC_1.17.4.1)	0	0	0	0	0	0	0	0	0	0	0	0	0	0	0	0	0	0	0	0	0	0	0	0	0	0	0	0	0	0	0	0	0	0	0	0	0	0	0	0	0	0	0	0	0	0
Cronobacter_muytjensii	TBD	CmuyJZ38_p1	Structural_protein_P5	0	0	0	0	0	0	0	0	0	0	0	0	0	0	0	0	0	0	0	0	0	0	0	0	0	0	0	0	0	0	0	0	0	0	0	0	0	0	0	0	0	0	0	0	0	0
Cronobacter_muytjensii	TBD	CmuyJZ38_p1	Thymidylate_synthase_(EC_2.1.1.45)	0	0	0	0	0	0	0	0	0	0	0	0	0	0	0	0	0	0	0	0	0	0	0	0	0	0	0	0	0	0	0	0	0	0	0	0	0	0	0	0	0	0	0	0	0	0
Cronobacter_muytjensii	TBD	CmuyJZ38_p1	Transcriptional_regulator	0	0	0	0	0	0	0	0	0	0	0	0	0	0	0	0	0	0	0	0	0	0	0	0	0	0	0	0	0	0	0	0	0	0	0	0	0	0	0	0	0	0	0	0	0	0
Cronobacter_muytjensii	TBD	CmuyJZ38_p1	hypothetical_protein_117	0	0	0	0	0	0	0	0	0	0	0	0	0	0	0	0	0	0	0	0	0	0	0	0	0	0	0	0	0	0	0	0	0	0	0	0	0	0	0	0	0	0	0	0	0	0
Cronobacter_muytjensii	TBD	CmuyJZ38_p1	hypothetical_protein_120	0	0	0	0	0	0	0	0	0	0	0	0	0	0	0	0	0	0	0	0	0	0	0	0	0	0	0	0	0	0	0	0	0	0	0	0	0	0	0	0	0	0	0	0	0	0
Cronobacter_muytjensii	TBD	CmuyJZ38_p1	hypothetical_protein_123	0	0	0	0	0	0	0	0	0	0	0	0	0	0	0	0	0	0	0	0	0	0	0	0	0	0	0	0	0	0	0	0	0	0	0	0	0	0	0	0	0	0	0	0	0	0
Cronobacter_muytjensii	TBD	CmuyJZ38_p1	hypothetical_protein_1356	0	0	0	0	0	0	0	0	0	0	0	0	0	0	0	0	0	0	0	0	0	0	0	0	0	0	0	0	0	0	0	0	0	0	0	0	0	0	0	0	0	0	0	0	0	0
Cronobacter_muytjensii	TBD	CmuyJZ38_p1	hypothetical_protein_150	0	0	0	0	0	0	0	0	0	0	0	0	0	0	0	0	0	0	0	0	0	0	0	0	0	0	0	0	0	0	0	0	0	0	0	0	0	0	0	0	0	0	0	0	0	0
Cronobacter_muytjensii	TBD	CmuyJZ38_p1	hypothetical_protein_156	0	0	0	0	0	0	0	0	0	0	0	0	0	0	0	0	0	0	0	0	0	0	0	0	0	0	0	0	0	0	0	0	0	0	0	0	0	0	0	0	0	0	0	0	0	0
Cronobacter_muytjensii	TBD	CmuyJZ38_p1	hypothetical_protein_159	0	0	0	0	0	0	0	0	0	0	0	0	0	0	0	0	0	0	0	0	0	0	0	0	0	0	0	0	0	0	0	0	0	0	0	0	0	0	0	0	0	0	0	0	0	0
Cronobacter_muytjensii	TBD	CmuyJZ38_p1	hypothetical_protein_174	0	0	0	0	0	0	0	0	0	0	0	0	0	0	0	0	0	0	0	0	0	0	0	0	0	0	0	0	0	0	0	0	0	0	0	0	0	0	0	0	0	0	0	0	0	0
Cronobacter_muytjensii	TBD	CmuyJZ38_p1	hypothetical_protein_186	0	0	0	0	0	0	0	0	0	0	0	0	0	0	0	0	0	0	0	0	0	0	0	0	0	0	0	0	0	0	0	0	0	0	0	0	0	0	0	0	0	0	0	0	0	0
Cronobacter_muytjensii	TBD	CmuyJZ38_p1	hypothetical_protein_189	0	0	0	0	0	0	0	0	0	0	0	0	0	0	0	0	0	0	0	0	0	0	0	0	0	0	0	0	0	0	0	0	0	0	0	0	0	0	0	0	0	0	0	0	0	0
Cronobacter_muytjensii	TBD	CmuyJZ38_p1	hypothetical_protein_195	0	0	0	0	0	0	0	0	0	0	0	0	0	0	0	0	0	0	0	0	0	0	0	0	0	0	0	0	0	0	0	0	0	0	0	0	0	0	0	0	0	0	0	0	0	0
Cronobacter_muytjensii	TBD	CmuyJZ38_p1	hypothetical_protein_201	0	0	0	0	0	0	0	0	0	0	0	0	0	0	0	0	0	0	0	0	0	0	0	0	0	0	0	0	0	0	0	0	0	0	0	0	0	0	0	0	0	0	0	0	0	0
Cronobacter_muytjensii	TBD	CmuyJZ38_p1	hypothetical_protein_204	0	0	0	0	0	0	0	0	0	0	0	0	0	0	0	0	0	0	0	0	0	0	0	0	0	0	0	0	0	0	0	0	0	0	0	0	0	0	0	0	0	0	0	0	0	0
Cronobacter_muytjensii	TBD	CmuyJZ38_p1	hypothetical_protein_207	0	0	0	0	0	0	0	0	0	0	0	0	0	0	0	0	0	0	0	0	0	0	0	0	0	0	0	0	0	0	0	0	0	0	0	0	0	0	0	0	0	0	0	0	0	0
Cronobacter_muytjensii	TBD	CmuyJZ38_p1	hypothetical_protein_210	0	0	0	0	0	0	0	0	0	0	0	0	0	0	0	0	0	0	0	0	0	0	0	0	0	0	0	0	0	0	0	0	0	0	0	0	0	0	0	0	0	0	0	0	0	0
Cronobacter_muytjensii	TBD	CmuyJZ38_p1	hypothetical_protein_213	0	0	0	0	0	0	0	0	0	0	0	0	0	0	0	0	0	0	0	0	0	0	0	0	0	0	0	0	0	0	0	0	0	0	0	0	0	0	0	0	0	0	0	0	0	0
Cronobacter_muytjensii	TBD	CmuyJZ38_p1	hypothetical_protein_219	0	0	0	0	0	0	0	0	0	0	0	0	0	0	0	0	0	0	0	0	0	0	0	0	0	0	0	0	0	0	0	0	0	0	0	0	0	0	0	0	0	0	0	0	0	0
Cronobacter_muytjensii	TBD	CmuyJZ38_p1	hypothetical_protein_234	0	0	0	0	0	0	0	0	0	0	0	0	0	0	0	0	0	0	0	0	0	0	0	0	0	0	0	0	0	0	0	0	0	0	0	0	0	0	0	0	0	0	0	0	0	0
Cronobacter_muytjensii	TBD	CmuyJZ38_p1	hypothetical_protein_237	0	0	0	0	0	0	0	0	0	0	0	0	0	0	0	0	0	0	0	0	0	0	0	0	0	0	0	0	0	0	0	0	0	0	0	0	0	0	0	0	0	0	0	0	0	0
Cronobacter_muytjensii	TBD	CmuyJZ38_p1	hypothetical_protein_243	0	0	0	0	0	0	0	0	0	0	0	0	0	0	0	0	0	0	0	0	0	0	0	0	0	0	0	0	0	0	0	0	0	0	0	0	0	0	0	0	0	0	0	0	0	0
Cronobacter_muytjensii	TBD	CmuyJZ38_p1	hypothetical_protein_252	0	0	0	0	0	0	0	0	0	0	0	0	0	0	0	0	0	0	0	0	0	0	0	0	0	0	0	0	0	0	0	0	0	0	0	0	0	0	0	0	0	0	0	0	0	0
Cronobacter_muytjensii	TBD	CmuyJZ38_p1	hypothetical_protein_261	0	0	0	0	0	0	0	0	0	0	0	0	0	0	0	0	0	0	0	0	0	0	0	0	0	0	0	0	0	0	0	0	0	0	0	0	0	0	0	0	0	0	0	0	0	0
Cronobacter_muytjensii	TBD	CmuyJZ38_p1	hypothetical_protein_267	0	0	0	0	0	0	0	0	0	0	0	0	0	0	0	0	0	0	0	0	0	0	0	0	0	0	0	0	0	0	0	0	0	0	0	0	0	0	0	0	0	0	0	0	0	0
Cronobacter_muytjensii	TBD	CmuyJZ38_p1	hypothetical_protein_270	0	0	0	0	0	0	0	0	0	0	0	0	0	0	0	0	0	0	0	0	0	0	0	0	0	0	0	0	0	0	0	0	0	0	0	0	0	0	0	0	0	0	0	0	0	0
Cronobacter_muytjensii	TBD	CmuyJZ38_p1	hypothetical_protein_285	0	0	0	0	0	0	0	0	0	0	0	0	0	0	0	0	0	0	0	0	0	0	0	0	0	0	0	0	0	0	0	0	0	0	0	0	0	0	0	0	0	0	0	0	0	0
Cronobacter_muytjensii	TBD	CmuyJZ38_p1	hypothetical_protein_291	0	0	0	0	0	0	0	0	0	0	0	0	0	0	0	0	0	0	0	0	0	0	0	0	0	0	0	0	0	0	0	0	0	0	0	0	0	0	0	0	0	0	0	0	0	0
Cronobacter_muytjensii	TBD	CmuyJZ38_p1	hypothetical_protein_294	0	0	0	0	0	0	0	0	0	0	0	0	0	0	0	0	0	0	0	0	0	0	0	0	0	0	0	0	0	0	0	0	0	0	0	0	0	0	0	0	0	0	0	0	0	0
Cronobacter_muytjensii	TBD	CmuyJZ38_p1	hypothetical_protein_303	0	0	0	0	0	0	0	0	0	0	0	0	0	0	0	0	0	0	0	0	0	0	0	0	0	0	0	0	0	0	0	0	0	0	0	0	0	0	0	0	0	0	0	0	0	0
Cronobacter_muytjensii	TBD	CmuyJZ38_p1	hypothetical_protein_306	0	0	0	0	0	0	0	0	0	0	0	0	0	0	0	0	0	0	0	0	0	0	0	0	0	0	0	0	0	0	0	0	0	0	0	0	0	0	0	0	0	0	0	0	0	0
Cronobacter_muytjensii	TBD	CmuyJZ38_p1	hypothetical_protein_318	0	0	0	0	0	0	0	0	0	0	0	0	0	0	0	0	0	0	0	0	0	0	0	0	0	0	0	0	0	0	0	0	0	0	0	0	0	0	0	0	0	0	0	0	0	0
Cronobacter_muytjensii	TBD	CmuyJZ38_p1	hypothetical_protein_330	0	0	0	0	0	0	0	0	0	0	0	0	0	0	0	0	0	0	0	0	0	0	0	0	0	0	0	0	0	0	0	0	0	0	0	0	0	0	0	0	0	0	0	0	0	0
Cronobacter_muytjensii	TBD	CmuyJZ38_p1	hypothetical_protein_339	0	0	0	0	0	0	0	0	0	0	0	0	0	0	0	0	0	0	0	0	0	0	0	0	0	0	0	0	0	0	0	0	0	0	0	0	0	0	0	0	0	0	0	0	0	0
Cronobacter_muytjensii	TBD	CmuyJZ38_p1	hypothetical_protein_345	0	0	0	0	0	0	0	0	0	0	0	0	0	0	0	0	0	0	0	0	0	0	0	0	0	0	0	0	0	0	0	0	0	0	0	0	0	0	0	0	0	0	0	0	0	0
Cronobacter_muytjensii	TBD	CmuyJZ38_p1	hypothetical_protein_351	0	0	0	0	0	0	0	0	0	0	0	0	0	0	0	0	0	0	0	0	0	0	0	0	0	0	0	0	0	0	0	0	0	0	0	0	0	0	0	0	0	0	0	0	0	0
Cronobacter_muytjensii	TBD	CmuyJZ38_p1	hypothetical_protein_366	0	0	0	0	0	0	0	0	0	0	0	0	0	0	0	0	0	0	0	0	0	0	0	0	0	0	0	0	0	0	0	0	0	0	0	0	0	0	0	0	0	0	0	0	0	0
Cronobacter_muytjensii	TBD	CmuyJZ38_p1	hypothetical_protein_381	0	0	0	0	0	0	0	0	0	0	0	0	0	0	0	0	0	0	0	0	0	0	0	0	0	0	0	0	0	0	0	0	0	0	0	0	0	0	0	0	0	0	0	0	0	0
Cronobacter_muytjensii	TBD	CmuyJZ38_p1	hypothetical_protein_387	0	0	0	0	0	0	0	0	0	0	0	0	0	0	0	0	0	0	0	0	0	0	0	0	0	0	0	0	0	0	0	0	0	0	0	0	0	0	0	0	0	0	0	0	0	0
Cronobacter_muytjensii	TBD	CmuyJZ38_p1	hypothetical_protein_393	0	0	0	0	0	0	0	0	0	0	0	0	0	0	0	0	0	0	0	0	0	0	0	0	0	0	0	0	0	0	0	0	0	0	0	0	0	0	0	0	0	0	0	0	0	0
Cronobacter_muytjensii	TBD	CmuyJZ38_p1	hypothetical_protein_405	0	0	0	0	0	0	0	0	0	0	0	0	0	0	0	0	0	0	0	0	0	0	0	0	0	0	0	0	0	0	0	0	0	0	0	0	0	0	0	0	0	0	0	0	0	0
Cronobacter_muytjensii	TBD	CmuyJZ38_p1	hypothetical_protein_420	0	0	0	0	0	0	0	0	0	0	0	0	0	0	0	0	0	0	0	0	0	0	0	0	0	0	0	0	0	0	0	0	0	0	0	0	0	0	0	0	0	0	0	0	0	0
Cronobacter_muytjensii	TBD	CmuyJZ38_p1	hypothetical_protein_423	0	0	0	0	0	0	0	0	0	0	0	0	0	0	0	0	0	0	0	0	0	0	0	0	0	0	0	0	0	0	0	0	0	0	0	0	0	0	0	0	0	0	0	0	0	0
Cronobacter_muytjensii	TBD	CmuyJZ38_p1	hypothetical_protein_429	0	0	0	0	0	0	0	0	0	0	0	0	0	0	0	0	0	0	0	0	0	0	0	0	0	0	0	0	0	0	0	0	0	0	0	0	0	0	0	0	0	0	0	0	0	0
Cronobacter_muytjensii	TBD	CmuyJZ38_p1	hypothetical_protein_432	0	0	0	0	0	0	0	0	0	0	0	0	0	0	0	0	0	0	0	0	0	0	0	0	0	0	0	0	0	0	0	0	0	0	0	0	0	0	0	0	0	0	0	0	0	0
Cronobacter_muytjensii	TBD	CmuyJZ38_p1	hypothetical_protein_435	0	0	0	0	0	0	0	0	0	0	0	0	0	0	0	0	0	0	0	0	0	0	0	0	0	0	0	0	0	0	0	0	0	0	0	0	0	0	0	0	0	0	0	0	0	0
Cronobacter_muytjensii	TBD	CmuyJZ38_p1	hypothetical_protein_447	0	0	0	0	0	0	0	0	0	0	0	0	0	0	0	0	0	0	0	0	0	0	0	0	0	0	0	0	0	0	0	0	0	0	0	0	0	0	0	0	0	0	0	0	0	0
Cronobacter_muytjensii	TBD	CmuyJZ38_p1	hypothetical_protein_459	0	0	0	0	0	0	0	0	0	0	0	0	0	0	0	0	0	0	0	0	0	0	0	0	0	0	0	0	0	0	0	0	0	0	0	0	0	0	0	0	0	0	0	0	0	0
Cronobacter_muytjensii	TBD	CmuyJZ38_p1	hypothetical_protein_471	0	0	0	0	0	0	0	0	0	0	0	0	0	0	0	0	0	0	0	0	0	0	0	0	0	0	0	0	0	0	0	0	0	0	0	0	0	0	0	0	0	0	0	0	0	0
Cronobacter_muytjensii	TBD	CmuyJZ38_p1	hypothetical_protein_480	0	0	0	0	0	0	0	0	0	0	0	0	0	0	0	0	0	0	0	0	0	0	0	0	0	0	0	0	0	0	0	0	0	0	0	0	0	0	0	0	0	0	0	0	0	0
Cronobacter_muytjensii	TBD	CmuyJZ38_p1	hypothetical_protein_489	0	0	0	0	0	0	0	0	0	0	0	0	0	0	0	0	0	0	0	0	0	0	0	0	0	0	0	0	0	0	0	0	0	0	0	0	0	0	0	0	0	0	0	0	0	0
Cronobacter_muytjensii	TBD	CmuyJZ38_p1	hypothetical_protein_507	0	0	0	0	0	0	0	0	0	0	0	0	0	0	0	0	0	0	0	0	0	0	0	0	0	0	0	0	0	0	0	0	0	0	0	0	0	0	0	0	0	0	0	0	0	0
Cronobacter_muytjensii	TBD	CmuyJZ38_p1	hypothetical_protein_540	0	0	0	0	0	0	0	0	0	0	0	0	0	0	0	0	0	0	0	0	0	0	0	0	0	0	0	0	0	0	0	0	0	0	0	0	0	0	0	0	0	0	0	0	0	0
Cronobacter_muytjensii	TBD	CmuyJZ38_p1	hypothetical_protein_549	0	0	0	0	0	0	0	0	0	0	0	0	0	0	0	0	0	0	0	0	0	0	0	0	0	0	0	0	0	0	0	0	0	0	0	0	0	0	0	0	0	0	0	0	0	0
Cronobacter_muytjensii	TBD	CmuyJZ38_p1	hypothetical_protein_570	0	0	0	0	0	0	0	0	0	0	0	0	0	0	0	0	0	0	0	0	0	0	0	0	0	0	0	0	0	0	0	0	0	0	0	0	0	0	0	0	0	0	0	0	0	0
Cronobacter_muytjensii	TBD	CmuyJZ38_p1	hypothetical_protein_594	0	0	0	0	0	0	0	0	0	0	0	0	0	0	0	0	0	0	0	0	0	0	0	0	0	0	0	0	0	0	0	0	0	0	0	0	0	0	0	0	0	0	0	0	0	0
Cronobacter_muytjensii	TBD	CmuyJZ38_p1	hypothetical_protein_612	0	0	0	0	0	0	0	0	0	0	0	0	0	0	0	0	0	0	0	0	0	0	0	0	0	0	0	0	0	0	0	0	0	0	0	0	0	0	0	0	0	0	0	0	0	0
Cronobacter_muytjensii	TBD	CmuyJZ38_p1	hypothetical_protein_624	0	0	0	0	0	0	0	0	0	0	0	0	0	0	0	0	0	0	0	0	0	0	0	0	0	0	0	0	0	0	0	0	0	0	0	0	0	0	0	0	0	0	0	0	0	0
Cronobacter_muytjensii	TBD	CmuyJZ38_p1	hypothetical_protein_654	0	0	0	0	0	0	0	0	0	0	0	0	0	0	0	0	0	0	0	0	0	0	0	0	0	0	0	0	0	0	0	0	0	0	0	0	0	0	0	0	0	0	0	0	0	0
Cronobacter_muytjensii	TBD	CmuyJZ38_p1	hypothetical_protein_690	0	0	0	0	0	0	0	0	0	0	0	0	0	0	0	0	0	0	0	0	0	0	0	0	0	0	0	0	0	0	0	0	0	0	0	0	0	0	0	0	0	0	0	0	0	0
Cronobacter_muytjensii	TBD	CmuyJZ38_p1	hypothetical_protein_705	0	0	0	0	0	0	0	0	0	0	0	0	0	0	0	0	0	0	0	0	0	0	0	0	0	0	0	0	0	0	0	0	0	0	0	0	0	0	0	0	0	0	0	0	0	0
Cronobacter_muytjensii	TBD	CmuyJZ38_p1	hypothetical_protein_717	0	0	0	0	0	0	0	0	0	0	0	0	0	0	0	0	0	0	0	0	0	0	0	0	0	0	0	0	0	0	0	0	0	0	0	0	0	0	0	0	0	0	0	0	0	0
Cronobacter_muytjensii	TBD	CmuyJZ38_p1	hypothetical_protein_735	0	0	0	0	0	0	0	0	0	0	0	0	0	0	0	0	0	0	0	0	0	0	0	0	0	0	0	0	0	0	0	0	0	0	0	0	0	0	0	0	0	0	0	0	0	0
Cronobacter_muytjensii	TBD	CmuyJZ38_p1	hypothetical_protein_741	0	0	0	0	0	0	0	0	0	0	0	0	0	0	0	0	0	0	0	0	0	0	0	0	0	0	0	0	0	0	0	0	0	0	0	0	0	0	0	0	0	0	0	0	0	0
Cronobacter_muytjensii	TBD	CmuyJZ38_p1	hypothetical_protein_747	0	0	0	0	0	0	0	0	0	0	0	0	0	0	0	0	0	0	0	0	0	0	0	0	0	0	0	0	0	0	0	0	0	0	0	0	0	0	0	0	0	0	0	0	0	0
Cronobacter_muytjensii	TBD	CmuyJZ38_p1	hypothetical_protein_777	0	0	0	0	0	0	0	0	0	0	0	0	0	0	0	0	0	0	0	0	0	0	0	0	0	0	0	0	0	0	0	0	0	0	0	0	0	0	0	0	0	0	0	0	0	0
Cronobacter_muytjensii	TBD	CmuyJZ38_p1	hypothetical_protein_828	0	0	0	0	0	0	0	0	0	0	0	0	0	0	0	0	0	0	0	0	0	0	0	0	0	0	0	0	0	0	0	0	0	0	0	0	0	0	0	0	0	0	0	0	0	0
Cronobacter_muytjensii	TBD	CmuyJZ38_p1	hypothetical_protein_834	0	0	0	0	0	0	0	0	0	0	0	0	0	0	0	0	0	0	0	0	0	0	0	0	0	0	0	0	0	0	0	0	0	0	0	0	0	0	0	0	0	0	0	0	0	0
Cronobacter_muytjensii	TBD	CmuyJZ38_p1	hypothetical_protein_873	0	0	0	0	0	0	0	0	0	0	0	0	0	0	0	0	0	0	0	0	0	0	0	0	0	0	0	0	0	0	0	0	0	0	0	0	0	0	0	0	0	0	0	0	0	0
Cronobacter_muytjensii	TBD	CmuyJZ38_p1	hypothetical_protein_891	0	0	0	0	0	0	0	0	0	0	0	0	0	0	0	0	0	0	0	0	0	0	0	0	0	0	0	0	0	0	0	0	0	0	0	0	0	0	0	0	0	0	0	0	0	0
Cronobacter_muytjensii	TBD	CmuyJZ38_p1	hypothetical_protein_909	0	0	0	0	0	0	0	0	0	0	0	0	0	0	0	0	0	0	0	0	0	0	0	0	0	0	0	0	0	0	0	0	0	0	0	0	0	0	0	0	0	0	0	0	0	0
Cronobacter_muytjensii	TBD	CmuyJZ38_p1	phosphoribosyl-ATP	0	0	0	0	0	0	0	0	0	0	0	0	0	0	0	0	0	0	0	0	0	0	0	0	0	0	0	0	0	0	0	0	0	0	0	0	0	0	0	0	0	0	0	0	0	0
Cronobacter_muytjensii	TBD	CmuyJZ38_p1	porphyrin	0	0	0	0	0	0	0	0	0	0	0	0	0	0	0	0	0	0	0	0	0	0	0	0	0	0	0	0	0	0	0	0	0	0	0	0	0	0	0	0	0	0	0	0	0	0
Cronobacter_muytjensii	TBD	CmuyJZ38_p1	portal	0	0	0	0	0	0	0	0	0	0	0	0	0	0	0	0	0	0	0	0	0	0	0	0	0	0	0	0	0	0	0	0	0	0	0	0	0	0	0	0	0	0	0	0	0	0
Cronobacter_muytjensii	TBD	CmuyJZ38_p1	putative_DNA_methylase	0	0	0	0	0	0	0	0	0	0	0	0	0	0	0	0	0	0	0	0	0	0	0	0	0	0	0	0	0	0	0	0	0	0	0	0	0	0	0	0	0	0	0	0	0	0
Cronobacter_muytjensii	TBD	CmuyJZ38_p1	putative_membrane_protein	0	0	0	0	0	0	0	0	0	0	0	0	0	0	0	0	0	0	0	0	0	0	0	0	0	0	0	0	0	0	0	0	0	0	0	0	0	0	0	0	0	0	0	0	0	0
Cronobacter_muytjensii	TBD	CmuyJZ38_p1	serine	0	0	0	0	0	0	0	0	0	0	0	0	0	0	0	0	0	0	0	0	0	0	0	0	0	0	0	0	0	0	0	0	0	0	0	0	0	0	0	0	0	0	0	0	0	0
Cronobacter_muytjensii	TBD	CmuyJZ38_p1	tail	0	0	0	0	0	0	0	0	0	0	0	0	0	0	0	0	0	0	0	0	0	0	0	0	0	0	0	0	0	0	0	0	0	0	0	0	0	0	0	0	0	0	0	0	0	0
Cronobacter_muytjensii	TBD	CmuyJZ38_p1	tellurite	0	0	0	0	0	0	0	0	0	0	0	0	0	0	0	0	0	0	0	0	0	0	0	0	0	0	0	0	0	0	0	0	0	0	0	0	0	0	0	0	0	0	0	0	0	0
Cronobacter_muytjensii	TBD	CmuyJZ38_p1	terminase_1257	0	0	0	0	0	0	0	0	0	0	0	0	0	0	0	0	0	0	0	0	0	0	0	0	0	0	0	0	0	0	0	0	0	0	0	0	0	0	0	0	0	0	0	0	0	0
Cronobacter_muytjensii	virulence_plasmid	CmuyJZ38_p2	3',5'-cyclic-nucleotide_phosphodiesterase_(EC_3.1.4.17)	0	0	0	0	0	0	0	0	0	0	0	0	0	0	0	0	0	0	0	0	0	0	0	0	0	0	0	0	0	0	0	0	0	0	0	0	0	0	0	0	0	0	0	0	0	0
Cronobacter_muytjensii	virulence_plasmid	CmuyJZ38_p2	6-phospho-beta-glucosidase_(EC_3.2.1.86)	0	0	77.08	75.39	0	75.39	76.56	0	76.56	76.56	0	0	0	0	0	76.04	0	71.5	71.5	0	75.52	0	0	0	0	0	0	0	0	0	0	0	0	0	0	0	0	0	0	0	0	0	0	0	0	0
Cronobacter_muytjensii	virulence_plasmid	CmuyJZ38_p2	ABC_transporter,_permease_protein_(cluster_8,_B12/iron_complex)	0	0	91.66	0	92.07	0	100	91.56	90.76	92.07	0	0	0	0	0	91.86	90.95	91.76	91.76	100	91.42	0	0	0	0	0	0	0	0	0	0	0	0	0	0	0	0	0	0	0	0	0	0	0	0	0
Cronobacter_muytjensii	virulence_plasmid	CmuyJZ38_p2	ABC_transporter,_substrate-binding_protein_(cluster_8,_B12/iron_complex)	0	0	92.19	0	92.5	0	100	92.29	0	92.5	0	0	0	0	0	92.4	92.6	92.6	92.6	92.07	92.01	0	0	0	0	0	0	0	0	0	0	0	0	0	0	0	0	0	0	0	0	0	0	0	0	0
Cronobacter_muytjensii	virulence_plasmid	CmuyJZ38_p2	Acetyltransferase	0	0	96.05	0	97.18	0	96.05	95.67	0	96.05	0	0	0	0	0	95.29	0	96.42	96.42	100	0	0	0	0	0	0	0	0	0	0	0	0	0	0	0	0	0	0	0	0	0	0	0	0	0	0
Cronobacter_muytjensii	virulence_plasmid	CmuyJZ38_p2	Aerobactin_siderophore_receptor_IutA_@_TonB-dependent_siderophore_receptor	0	0	0	0	0	0	0	0	0	0	0	0	0	0	0	0	0	0	0	95.43	0	0	0	0	0	0	0	0	0	0	0	0	0	0	0	0	0	0	0	0	0	0	0	0	0	0
Cronobacter_muytjensii	virulence_plasmid	CmuyJZ38_p2	Aerobactin_synthase_(EC_6.3.2.39),_aerobactin_biosynthesis_protein_IucC	0	0	92.62	92.51	92.68	92.33	100	93.14	92.67	92.62	0	0	0	0	0	93.14	92.16	92.91	100	100	92.75	92.33	0	0	0	0	0	0	0	0	0	0	0	0	0	0	0	0	0	0	0	0	0	0	0	0
Cronobacter_muytjensii	virulence_plasmid	CmuyJZ38_p2	Antibiotic_biosynthesis_monooxygenase	0	0	0	0	0	0	0	0	0	0	0	0	0	0	0	0	0	0	0	0	0	0	0	0	0	0	0	0	0	0	0	0	0	0	0	0	0	0	0	0	0	0	0	0	0	0
Cronobacter_muytjensii	virulence_plasmid	CmuyJZ38_p2	Beta-glucoside_bgl_operon_antiterminator,_BglG_family	0	0	0	0	0	0	0	0	0	0	0	0	0	0	0	0	0	0	0	0	0	0	0	0	0	0	0	0	0	0	0	0	0	0	0	0	0	0	0	0	0	0	0	0	0	0
Cronobacter_muytjensii	virulence_plasmid	CmuyJZ38_p2	Blue_light-_and_temperature-regulated_antirepressor_BluF	0	0	0	0	0	0	0	0	0	0	0	0	0	0	0	0	0	0	0	0	0	0	0	0	0	0	0	0	0	0	0	0	0	0	0	0	0	0	0	0	0	0	0	0	0	0
Cronobacter_muytjensii	virulence_plasmid	CmuyJZ38_p2	Chromosome_(plasmid)_partitioning_protein_ParA	0	0	0	0	0	0	0	0	0	0	0	0	0	0	0	0	0	0	0	0	0	0	0	0	0	0	0	0	0	0	0	0	0	0	0	0	0	0	0	0	0	0	0	0	0	0
Cronobacter_muytjensii	virulence_plasmid	CmuyJZ38_p2	Chromosome_(plasmid)_partitioning_protein_ParB	0	0	0	0	0	0	0	0	0	0	0	0	0	0	0	0	0	0	0	0	0	0	0	0	0	0	0	0	0	0	0	0	0	0	0	0	0	0	0	0	0	0	0	0	0	0
Cronobacter_muytjensii	virulence_plasmid	CmuyJZ38_p2	Cobalt_ABC_transporter,_ATP-binding_protein_CbtL	0	0	0	0	0	0	0	0	0	0	0	0	0	0	0	0	0	0	0	0	0	0	0	0	0	0	0	0	0	0	0	0	0	0	0	0	0	0	0	0	0	0	0	0	0	0
Cronobacter_muytjensii	virulence_plasmid	CmuyJZ38_p2	Cobalt_ABC_transporter,_permease_protein_CbtK	0	0	0	0	0	0	90.46	0	0	0	0	0	0	0	0	0	0	0	0	0	0	0	0	0	0	0	0	0	0	0	0	0	0	0	0	0	0	0	0	0	0	0	0	0	0	0
Cronobacter_muytjensii	virulence_plasmid	CmuyJZ38_p2	Cobalt_ABC_transporter,_substrate-binding_protein_CbtJ	0	0	0	0	0	0	0	0	0	0	0	0	0	0	0	0	0	0	0	0	0	0	0	0	0	0	0	0	0	0	0	0	0	0	0	0	0	0	0	0	0	0	0	0	0	0
Cronobacter_muytjensii	virulence_plasmid	CmuyJZ38_p2	DNA_replication_protein	0	0	0	0	0	0	0	0	0	0	0	0	0	0	0	0	0	0	0	0	0	0	0	0	0	0	0	0	0	0	0	0	0	0	0	0	0	0	0	0	0	0	0	0	0	0
Cronobacter_muytjensii	virulence_plasmid	CmuyJZ38_p2	Dihydrodipicolinate_synthase_family	0	0	0	0	0	0	0	0	0	0	0	0	0	0	0	0	0	0	0	0	0	0	0	0	0	0	0	0	0	0	0	0	0	0	0	0	0	0	0	0	0	0	0	0	0	0
Cronobacter_muytjensii	virulence_plasmid	CmuyJZ38_p2	FIG00553445:_hypothetical_protein_939	0	0	83.74	0	83.95	0	84.59	0	0	84.7	0	0	0	0	0	0	0	83.76	83.76	0	0	0	0	0	0	0	0	0	0	0	0	0	0	0	0	0	0	0	0	0	0	0	0	0	0	0
Cronobacter_muytjensii	virulence_plasmid	CmuyJZ38_p2	FIG00553537:_hypothetical_protein_1059	0	0	0	0	0	0	95.85	0	0	95.85	0	0	0	0	0	96.32	0	96.03	96.03	96.03	96.03	0	0	0	0	0	0	0	0	0	0	0	0	0	0	0	0	0	0	0	0	0	0	0	0	0
Cronobacter_muytjensii	virulence_plasmid	CmuyJZ38_p2	FIG00554127:_hypothetical_protein_300	0	0	0	0	0	0	0	0	0	0	0	0	0	0	0	0	0	0	0	0	0	0	0	0	0	0	0	0	0	0	0	0	0	0	0	0	0	0	0	0	0	0	0	0	0	0
Cronobacter_muytjensii	virulence_plasmid	CmuyJZ38_p2	FIG00554570:_hypothetical_protein_1182	0	0	0	0	0	0	0	0	0	0	0	0	0	0	0	0	0	0	0	0	0	0	0	0	0	0	0	0	0	0	0	0	0	0	0	0	0	0	0	0	0	0	0	0	0	0
Cronobacter_muytjensii	virulence_plasmid	CmuyJZ38_p2	Glutathione_S-transferase_(EC_2.5.1.18)	0	0	0	0	0	0	0	0	0	0	0	0	0	0	0	0	0	0	0	0	0	0	0	0	0	0	0	0	0	0	0	0	0	0	0	0	0	0	0	0	0	0	0	0	0	0
Cronobacter_muytjensii	virulence_plasmid	CmuyJZ38_p2	HTH-type_transcriptional_repressor_YcgE	0	0	0	0	0	0	0	0	0	0	0	0	0	0	0	0	0	0	0	0	0	0	0	0	0	0	0	0	0	0	0	0	0	0	0	0	0	0	0	0	0	0	0	0	0	0
Cronobacter_muytjensii	virulence_plasmid	CmuyJZ38_p2	Hemolysin_activator_protein_precursor	0	0	0	0	0	0	0	0	0	0	0	0	0	0	0	0	0	0	0	0	0	0	0	0	0	0	0	0	0	0	0	0	0	0	0	0	0	0	0	0	0	0	0	0	0	0
Cronobacter_muytjensii	virulence_plasmid	CmuyJZ38_p2	HipB_protein_@_Antitoxin_HigA	0	0	0	0	0	0	89.59	0	0	89.58	0	0	0	0	0	0	89.24	89.24	89.24	0	0	0	0	0	0	0	0	0	0	0	0	0	0	0	0	0	0	0	0	0	0	0	0	0	0	0
Cronobacter_muytjensii	virulence_plasmid	CmuyJZ38_p2	Histone_acetyltransferase_HPA2_and_related_acetyltransferases	0	0	0	0	0	0	0	0	0	0	0	0	0	0	0	0	0	0	0	0	0	0	0	0	0	0	0	0	0	0	0	0	0	0	0	0	0	0	0	0	0	0	0	0	0	0
Cronobacter_muytjensii	virulence_plasmid	CmuyJZ38_p2	Integrase/recombinase	0	0	0	0	0	0	87.69	0	87.63	0	0	0	0	0	0	0	0	0	0	0	0	0	0	0	0	0	0	0	0	0	0	0	0	0	0	0	0	0	0	0	0	0	0	0	0	0
Cronobacter_muytjensii	virulence_plasmid	CmuyJZ38_p2	Iron-chelator_utilization_protein	0	0	88.79	87.87	88.68	100	88.44	88.45	0	88.54	0	0	0	0	0	89.01	87.44	88.12	88.12	88.45	88.45	87.87	0	0	0	0	0	0	0	0	0	0	0	0	0	0	0	0	0	0	0	0	0	0	0	0
Cronobacter_muytjensii	virulence_plasmid	CmuyJZ38_p2	L-lysine_6-monooxygenase_[NADPH]_(EC_1.14.13.59),_aerobactin_biosynthesis_protein_IucD_@_Siderophore_biosynthesis_protein,_monooxygenase	0	0	95.01	94.94	94.86	94.86	100	94.87	94.8	94.63	0	0	0	0	0	94.78	95.01	92.63	94.94	100	93.79	94.86	0	0	0	0	0	0	0	0	0	0	0	0	0	0	0	0	0	0	0	0	0	0	0	0
Cronobacter_muytjensii	virulence_plasmid	CmuyJZ38_p2	LSU_ribosomal_protein_L16p_arginine_hydroxylase	0	0	0	0	0	0	0	0	0	0	0	0	0	0	0	0	0	0	0	0	0	0	0	0	0	0	0	0	0	0	0	0	0	0	0	0	0	0	0	0	0	0	0	0	0	0
Cronobacter_muytjensii	virulence_plasmid	CmuyJZ38_p2	Lactoylglutathione_lyase_and_related_lyases	0	0	0	0	0	0	0	0	0	0	0	0	0	0	0	0	0	0	0	0	0	0	0	0	0	0	0	0	0	0	0	0	0	0	0	0	0	0	0	0	0	0	0	0	0	0
Cronobacter_muytjensii	virulence_plasmid	CmuyJZ38_p2	Limit_dextrin_alpha-1,6-maltotetraose-hydrolase_(EC_3.2.1.196)	0	0	0	0	0	0	0	0	0	0	0	0	0	0	0	0	0	0	0	0	0	0	0	0	0	0	0	0	0	0	0	0	0	0	0	0	0	0	0	0	0	0	0	0	0	0
Cronobacter_muytjensii	virulence_plasmid	CmuyJZ38_p2	LysR_family_transcriptional_regulator_KPN_02280	0	0	0	0	0	0	0	0	0	0	0	0	0	0	0	0	0	0	0	0	0	0	0	0	0	0	0	0	0	0	0	0	0	0	0	0	0	0	0	0	0	0	0	0	0	0
Cronobacter_muytjensii	virulence_plasmid	CmuyJZ38_p2	Malto-oligosyltrehalose_synthase_(EC_5.4.99.15)	0	0	0	0	0	0	0	0	0	0	0	0	0	0	0	0	0	0	0	0	0	0	0	0	0	0	0	0	0	0	0	0	0	0	0	0	0	0	0	0	0	0	0	0	0	0
Cronobacter_muytjensii	virulence_plasmid	CmuyJZ38_p2	Malto-oligosyltrehalose_trehalohydrolase_(EC_3.2.1.141)	0	0	90.45	100	90.29	90.57	100	90.12	90.23	90.17	0	0	0	0	0	90.4	90.59	90.13	90.23	90.13	90.86	90.57	0	0	0	0	0	0	0	0	0	0	0	0	0	0	0	0	0	0	0	0	0	0	0	0
Cronobacter_muytjensii	virulence_plasmid	CmuyJZ38_p2	Methyl-accepting_chemotaxis_protein_I_(serine_chemoreceptor_protein)	0	0	86.42	86.42	86.42	86.42	86.67	87.8	86.42	86.42	0	86.42	86.42	86.42	86.42	0	86.42	86.42	86.42	86.42	86.42	86.42	0	83.13	0	0	83.13	83.13	83.13	83.13	83.13	83.13	0	0	0	0	0	0	83.95	83.13	83.13	83.13	0	83.95	81.63	83.13
Cronobacter_muytjensii	virulence_plasmid	CmuyJZ38_p2	Methyl-accepting_chemotaxis_sensor/transducer_protein	0	100	100	100	100	88.1	100	100	100	100	0	100	100	100	100	100	100	100	100	100	100	100	88.24	88.24	88.24	88.24	88.24	88.24	88.24	88.24	88.24	88.24	88.24	88.24	0	0	0	0	94.2	100	100	100	100	100	85.57	79.47
Cronobacter_muytjensii	virulence_plasmid	CmuyJZ38_p2	Mg(2+)_transport_ATPase,_P-type_(EC_3.6.3.2)	0	0	0	0	0	0	0	0	0	0	0	0	0	0	0	0	0	0	0	0	0	0	0	0	0	0	0	0	0	0	0	0	0	0	0	0	0	0	0	0	0	0	0	0	0	0
Cronobacter_muytjensii	virulence_plasmid	CmuyJZ38_p2	N(2)-citryl-N(6)-acetyl-N(6)-hydroxylysine_synthase_(EC_6.3.2.38),_aerobactin_biosynthesis_protein_IucA	0	0	91.89	100	91.71	91.71	100	91.77	91.47	92	0	0	0	0	0	91.72	91.49	91.97	91.35	90.85	92.48	91.71	0	0	0	0	0	0	0	0	0	0	0	0	0	0	0	0	0	0	0	0	0	0	0	0
Cronobacter_muytjensii	virulence_plasmid	CmuyJZ38_p2	N6-hydroxylysine_O-acetyltransferase_(EC_2.3.1.102),_aerobactin_biosynthesis_protein_IucB_@_Siderophore_synthetase_small_component,_acetyltransferase	0	0	92.11	91.8	92.53	91.8	100	92.53	0	92.11	0	0	0	0	0	92.22	91.14	91.67	92.78	92.43	92.41	91.8	0	0	0	0	0	0	0	0	0	0	0	0	0	0	0	0	97.87	0	0	0	0	97.87	0	0
Cronobacter_muytjensii	virulence_plasmid	CmuyJZ38_p2	NUDIX_hydrolase	0	0	0	0	0	0	0	0	0	0	0	0	0	0	0	0	0	0	0	0	0	0	0	0	0	0	0	0	0	0	0	0	0	0	0	0	0	0	0	0	0	0	0	0	0	0
Cronobacter_muytjensii	virulence_plasmid	CmuyJZ38_p2	Non-heme_chloroperoxidase_(EC_1.11.1.10)	0	0	94.65	0	95.38	0	95.13	95.13	95.13	95.13	0	0	0	0	0	94.89	0	94.65	94.65	95.74	95.74	0	0	0	0	0	0	0	0	0	0	0	0	0	0	0	0	0	0	0	0	0	0	0	0	0
Cronobacter_muytjensii	virulence_plasmid	CmuyJZ38_p2	Outer_membrane_protein	0	0	0	81.16	0	0	0	0	0	0	0	0	0	0	0	0	0	0	0	73.6	73.6	0	0	0	0	0	0	0	0	0	0	0	0	0	0	0	0	0	0	0	0	0	0	0	0	0
Cronobacter_muytjensii	virulence_plasmid	CmuyJZ38_p2	Outer_membrane_protein_V	0	0	0	0	0	0	0	0	0	0	0	0	0	0	0	0	0	0	0	0	0	0	0	0	0	0	0	0	0	0	0	0	0	0	0	0	0	0	0	0	0	0	0	0	0	0
Cronobacter_muytjensii	virulence_plasmid	CmuyJZ38_p2	Oxidoreductase,_short-chain_dehydrogenase/reductase_family	0	0	84.6	0	84.93	0	84.32	84.78	0	84.32	0	0	0	0	0	84.5	83.76	84.47	84.47	84.47	84.47	0	0	0	0	0	0	0	0	0	0	0	0	0	0	0	0	0	0	0	0	0	0	0	0	0
Cronobacter_muytjensii	virulence_plasmid	CmuyJZ38_p2	PTS_system,_beta-glucoside-specific_IIB_component_/_PTS_system,_beta-glucoside-specific_IIC_component	0	0	0	0	0	0	0	0	0	0	0	0	0	0	0	0	0	0	0	0	0	0	0	0	0	0	0	0	0	0	0	0	0	0	0	0	0	0	0	0	0	0	0	0	0	0
Cronobacter_muytjensii	virulence_plasmid	CmuyJZ38_p2	PTS_system,_beta-glucoside-specific_IIB_component_/_PTS_system,_beta-glucoside-specific_IIC_component_/_PTS_system,_beta-glucoside-specific_IIA_component	0	0	0	0	0	0	0	0	0	0	0	0	0	0	0	0	0	0	0	0	0	0	0	0	0	0	0	0	0	0	0	0	0	0	0	0	0	0	0	0	0	0	0	0	0	0
Cronobacter_muytjensii	virulence_plasmid	CmuyJZ38_p2	Permease_of_the_drug/metabolite_transporter_(DMT)_superfamily	0	0	0	0	0	0	0	0	0	0	0	0	0	0	0	0	0	0	0	0	0	0	0	0	0	0	0	0	0	0	0	0	0	0	0	0	0	0	0	0	0	0	0	0	0	0
Cronobacter_muytjensii	virulence_plasmid	CmuyJZ38_p2	Phosphoglycerate_mutase	0	0	0	0	0	0	98.04	0	0	93.75	0	0	0	0	0	0	0	0	0	95.43	0	0	0	0	0	0	0	0	0	0	0	0	0	0	0	0	0	0	0	0	0	0	0	98.19	0	0
Cronobacter_muytjensii	virulence_plasmid	CmuyJZ38_p2	Possible_H+-antiporter_clustered_with_aerobactin_genes	0	0	91.5	100	91.25	91.34	100	91.17	94.92	91.34	0	0	0	0	0	91.5	91.09	90.76	90.76	100	90.3	91.34	0	0	0	0	0	0	0	0	0	0	0	0	0	0	0	0	0	0	0	0	0	0	0	0
Cronobacter_muytjensii	virulence_plasmid	CmuyJZ38_p2	Possible_adhesin/hemolysin_precursor	96.68	100	0	85.54	89.86	0	100	0	0	100	86.28	86.28	87.92	0	0	87.78	96.07	0	0	0	0	0	0	0	0	0	0	0	0	0	0	0	0	0	0	0	0	0	100	0	0	0	0	0	97.55	0
Cronobacter_muytjensii	virulence_plasmid	CmuyJZ38_p2	Probable_transcription_regulator_Mig-14	0	0	0	0	0	0	0	0	0	0	0	0	0	0	0	0	0	0	0	0	0	0	0	0	0	0	0	0	0	0	0	0	0	0	0	0	0	0	0	0	0	0	0	0	0	0
Cronobacter_muytjensii	virulence_plasmid	CmuyJZ38_p2	Probable_two-component-system_connector_protein_AriR	0	0	0	0	0	0	0	0	0	0	0	0	0	0	0	0	0	0	0	0	0	0	0	0	0	0	0	0	0	0	0	0	0	0	0	0	0	0	0	0	0	0	0	0	0	0
Cronobacter_muytjensii	virulence_plasmid	CmuyJZ38_p2	Probable_two-component-system_connector_protein_YcgZ	0	0	0	0	0	0	0	0	0	0	0	0	0	0	0	0	0	0	0	0	0	0	0	0	0	0	0	0	0	0	0	0	0	0	0	0	0	0	0	0	0	0	0	0	0	0
Cronobacter_muytjensii	virulence_plasmid	CmuyJZ38_p2	Prolyl_endopeptidase_(EC_3.4.21.26)	0	0	0	0	0	0	0	0	0	0	0	0	0	0	0	0	0	0	0	0	0	0	0	0	0	0	0	0	0	0	0	0	0	0	0	0	0	0	0	0	0	0	0	0	0	0
Cronobacter_muytjensii	virulence_plasmid	CmuyJZ38_p2	Protein_tyrosine_phosphatase	0	0	0	0	0	0	0	0	0	0	0	0	0	0	0	0	0	0	0	0	0	0	0	0	0	0	0	0	0	0	0	0	0	0	0	0	0	0	0	0	0	0	0	0	0	0
Cronobacter_muytjensii	virulence_plasmid	CmuyJZ38_p2	Putative_large_exoprotein_involved_in_heme_utilization_or_adhesion_of_ShlA/HecA/FhaA_family	0	0	95.66	0	100	0	100	100	100	95.79	0	0	0	0	0	96.06	94.44	95.75	100	100	96.21	0	0	0	0	0	0	0	0	0	0	0	0	0	0	0	0	0	0	0	0	0	0	0	0	0
Cronobacter_muytjensii	virulence_plasmid	CmuyJZ38_p2	RND_efflux_system,_inner_membrane_transporter	0	0	0	0	0	0	97.41	0	0	0	0	0	0	0	0	0	0	0	0	0	0	0	0	0	0	0	0	0	0	0	0	0	0	0	0	0	0	0	0	0	0	0	0	0	0	0
Cronobacter_muytjensii	virulence_plasmid	CmuyJZ38_p2	Rhomboid_family_protein	0	0	0	0	0	0	0	0	0	0	0	0	0	0	0	0	0	0	0	0	95.85	0	0	0	0	0	0	0	0	0	0	0	0	0	0	0	0	0	0	0	0	0	0	0	0	0
Cronobacter_muytjensii	virulence_plasmid	CmuyJZ38_p2	Starvation_sensing_protein_RspA	0	0	0	0	0	0	0	0	0	0	0	0	0	0	0	0	0	0	0	0	0	0	0	0	0	0	0	0	0	0	0	0	0	0	0	0	0	0	0	0	0	0	0	0	0	0
Cronobacter_muytjensii	virulence_plasmid	CmuyJZ38_p2	T6SS_AAA+_chaperone_ClpV_(TssH)	0	0	0	0	0	0	78.25	78.33	100	78.25	0	0	0	0	0	0	0	0	0	78.33	78.3	0	0	0	0	0	0	0	0	0	0	0	0	0	0	0	0	0	0	0	0	0	0	0	0	0
Cronobacter_muytjensii	virulence_plasmid	CmuyJZ38_p2	T6SS_component_Hcp	0	85.8	0	91.39	0	0	100	91.6	91.8	91.8	0	0	0	0	0	0	0	0	0	91.39	91.39	0	95.33	95.33	95.33	95.33	95.33	95.33	95.33	95.33	95.33	95.33	95.33	95.33	0	0	0	0	95.33	95.33	0	0	95.33	95.33	95.33	0
Cronobacter_muytjensii	virulence_plasmid	CmuyJZ38_p2	T6SS_component_TssB_(ImpB/VipA)	0	0	0	0	0	0	0	0	0	0	0	0	0	0	0	0	0	0	0	0	0	0	0	0	0	0	0	0	0	0	0	0	0	0	0	0	0	0	0	0	0	0	0	0	0	0
Cronobacter_muytjensii	virulence_plasmid	CmuyJZ38_p2	T6SS_component_TssC_(ImpC/VipB)	0	0	95.28	0	0	0	100	0	0	0	0	0	0	0	0	0	0	0	0	0	0	0	0	0	0	0	0	0	0	0	0	0	0	0	0	0	0	0	0	0	0	0	0	0	0	0
Cronobacter_muytjensii	virulence_plasmid	CmuyJZ38_p2	T6SS_component_TssF_(ImpG/VasA)	0	0	0	0	0	0	0	0	0	0	0	0	0	0	0	0	0	0	0	0	0	0	0	0	0	0	0	0	0	0	0	0	0	0	0	0	0	0	79.34	0	0	0	0	0	0	0
Cronobacter_muytjensii	virulence_plasmid	CmuyJZ38_p2	T6SS_component_TssG_(ImpH/VasB)	0	0	0	0	0	0	0	87.5	0	0	0	0	0	100	0	0	100	0	0	0	0	0	0	0	0	0	0	0	0	0	0	0	0	0	0	0	0	0	0	0	0	0	0	0	0	0
Cronobacter_muytjensii	virulence_plasmid	CmuyJZ38_p2	T6SS_component_TssK_(ImpJ/VasE)	0	0	0	0	0	0	0	0	0	0	0	0	0	0	0	0	0	0	0	0	0	0	0	0	0	0	0	0	0	0	0	0	0	0	0	0	0	0	0	0	0	0	0	0	0	0
Cronobacter_muytjensii	virulence_plasmid	CmuyJZ38_p2	T6SS_component_TssM_(IcmF/VasK)	0	0	0	73.77	0	0	73.66	73.7	73.66	73.66	0	0	0	0	0	0	0	0	0	73.61	73.61	0	0	0	0	0	0	0	0	0	0	0	0	0	0	0	0	0	0	0	0	0	0	0	0	0
Cronobacter_muytjensii	virulence_plasmid	CmuyJZ38_p2	T6SS_outer_membrane_component_TssL_(ImpK/VasF)	0	0	0	0	0	0	0	0	0	0	0	0	0	0	0	0	0	0	0	0	0	0	0	0	0	0	0	0	0	0	0	0	0	0	0	0	0	0	0	0	0	0	0	0	0	0
Cronobacter_muytjensii	virulence_plasmid	CmuyJZ38_p2	T6SS_secretion_lipoprotein_TssJ_(VasD)	0	0	0	0	0	0	0	0	0	0	0	0	0	0	0	0	0	0	0	0	0	0	0	0	0	0	0	0	0	0	0	0	0	0	0	0	0	0	0	0	0	0	0	0	0	0
Cronobacter_muytjensii	virulence_plasmid	CmuyJZ38_p2	Thiol:disulfide_interchange_protein_DsbG_precursor	0	0	0	0	0	0	0	0	0	0	0	0	0	0	0	0	0	0	0	0	0	0	0	0	0	0	0	0	0	0	0	0	0	0	0	0	0	0	0	0	0	0	0	0	0	0
Cronobacter_muytjensii	virulence_plasmid	CmuyJZ38_p2	Toxin_HigB_/_Protein_kinase_domain_of_HipA	0	0	90.08	90.01	90.39	90.01	100	90.08	90.34	89.86	0	0	0	0	0	90.31	89.94	90.61	100	90.58	0	90.01	0	0	0	0	0	0	0	0	0	0	0	0	0	0	0	0	0	0	0	0	0	0	0	0
Cronobacter_muytjensii	virulence_plasmid	CmuyJZ38_p2	Transcriptional_regulator,_AcrR_family	0	0	0	0	0	0	88.14	84.46	0	84.82	0	0	0	0	0	84.46	84.46	84.74	84.74	84.64	0	0	0	0	0	0	0	0	0	0	0	0	0	0	0	0	0	0	0	0	0	0	0	0	0	0
Cronobacter_muytjensii	virulence_plasmid	CmuyJZ38_p2	Transcriptional_regulator,_AraC_family	0	0	0	0	0	0	0	0	0	0	0	0	0	0	0	0	0	0	0	0	0	0	0	0	0	0	0	0	0	0	0	0	0	0	0	0	0	0	0	0	0	0	0	0	0	0
Cronobacter_muytjensii	virulence_plasmid	CmuyJZ38_p2	Transcriptional_regulator,_ArsR_family	0	0	0	0	0	0	0	0	0	0	0	0	0	0	0	0	0	0	0	0	0	0	0	0	0	0	0	0	0	0	0	0	0	0	0	0	0	0	0	0	0	0	0	0	0	0
Cronobacter_muytjensii	virulence_plasmid	CmuyJZ38_p2	Transcriptional_regulator,_DeoR_family	0	0	92.24	0	92.67	0	92.96	92.97	92.96	92.96	0	0	0	0	0	92.96	0	93.25	93.39	92.96	92.96	0	0	0	0	0	0	0	0	0	0	0	0	0	0	0	0	0	0	0	0	0	0	0	0	0
Cronobacter_muytjensii	virulence_plasmid	CmuyJZ38_p2	Transcriptional_regulator,_GntR_family	0	0	0	0	0	0	0	0	0	0	0	0	0	0	0	0	0	0	0	0	0	0	0	0	0	0	0	0	0	0	0	0	0	0	0	0	0	0	0	0	0	0	0	0	0	0
Cronobacter_muytjensii	virulence_plasmid	CmuyJZ38_p2	Transcriptional_regulator,_GntR_family_domain_/_Aspartate_aminotransferase_(EC_2.6.1.1)	0	0	0	0	0	0	0	0	0	0	0	0	0	0	0	0	0	0	0	0	0	0	0	0	0	0	0	0	0	0	0	0	0	0	0	0	0	0	0	0	0	0	0	0	0	0
Cronobacter_muytjensii	virulence_plasmid	CmuyJZ38_p2	Transcriptional_regulator,_LysR_family	0	0	0	0	0	0	0	0	0	0	0	0	0	0	0	0	0	0	0	0	0	0	0	0	0	0	0	0	0	0	0	0	0	0	0	0	0	0	0	0	0	0	0	0	0	0
Cronobacter_muytjensii	virulence_plasmid	CmuyJZ38_p2	Two-component_system_sensor_histidine_kinase	0	0	0	0	0	0	0	0	0	0	0	0	0	0	0	0	0	0	0	0	0	0	0	0	0	0	0	0	0	0	0	0	0	0	0	0	0	0	0	0	0	0	0	0	0	0
Cronobacter_muytjensii	virulence_plasmid	CmuyJZ38_p2	Two-component_transcriptional_response_regulator,_LuxR_family	0	0	0	0	0	0	0	0	0	0	0	0	0	0	0	0	0	0	0	0	0	0	0	0	0	0	0	0	0	0	0	0	0	0	0	0	0	0	0	0	0	0	0	0	0	0
Cronobacter_muytjensii	virulence_plasmid	CmuyJZ38_p2	Uncharacterized_MFS-type_transporter	0	0	94.45	93.86	94.03	0	100	100	91.39	94.28	0	0	0	0	0	94.78	0	94.53	94.53	94.11	91.04	0	0	0	0	0	0	0	0	0	0	0	0	0	0	0	0	0	0	0	0	0	0	0	0	0
Cronobacter_muytjensii	virulence_plasmid	CmuyJZ38_p2	Uncharacterized_inner_membrane_protein_YnaJ	0	0	0	0	0	0	0	0	0	0	0	0	0	0	0	0	0	0	0	0	0	0	0	0	0	0	0	0	0	0	0	0	0	0	0	0	0	0	0	0	0	0	0	0	0	0
Cronobacter_muytjensii	virulence_plasmid	CmuyJZ38_p2	Uncharacterized_oxidoreductase_YesF	0	0	0	0	0	0	0	0	0	0	0	0	0	0	0	0	0	0	0	0	0	0	0	0	0	0	0	0	0	0	0	0	0	0	0	0	0	0	0	0	0	0	0	0	0	0
Cronobacter_muytjensii	virulence_plasmid	CmuyJZ38_p2	Uncharacterized_protein_YmjA	0	0	0	0	0	0	0	0	0	0	0	0	0	0	0	0	0	0	0	0	0	0	0	0	0	0	0	0	0	0	0	0	0	0	0	0	0	0	0	0	0	0	0	0	0	0
Cronobacter_muytjensii	virulence_plasmid	CmuyJZ38_p2	VgrG_protein	0	0	95.26	0	0	0	95.56	0	95.5	95.56	0	0	0	0	0	0	0	0	0	0	0	0	0	0	0	0	0	0	0	0	0	0	0	0	0	0	0	0	0	0	0	0	0	0	0	0
Cronobacter_muytjensii	virulence_plasmid	CmuyJZ38_p2	hypothetical_protein	0	0	0	0	0	0	0	0	88.8	0	0	0	0	0	0	0	0	89.64	0	0	0	0	0	0	0	0	0	0	0	0	0	0	0	0	0	0	0	0	0	0	0	0	0	0	0	0
Cronobacter_muytjensii	virulence_plasmid	CmuyJZ38_p2	hypothetical_protein_114	0	0	0	0	0	0	0	0	0	0	0	0	0	0	0	0	0	0	0	0	0	0	0	0	0	0	0	0	0	0	0	0	0	0	0	0	0	0	0	0	0	0	0	0	0	0
Cronobacter_muytjensii	virulence_plasmid	CmuyJZ38_p2	hypothetical_protein_1149	0	0	0	0	0	0	0	0	0	0	0	0	0	0	0	0	0	0	0	0	0	0	0	0	0	0	0	0	0	0	0	0	0	0	0	0	0	0	0	0	0	0	0	0	0	0
Cronobacter_muytjensii	virulence_plasmid	CmuyJZ38_p2	hypothetical_protein_117	0	0	0	0	0	0	0	0	0	0	0	0	0	0	0	0	0	0	0	0	0	0	0	0	0	0	0	0	0	0	0	0	0	0	0	0	0	0	0	0	0	0	0	0	0	0
Cronobacter_muytjensii	virulence_plasmid	CmuyJZ38_p2	hypothetical_protein_1182	0	0	0	0	0	0	0	0	0	0	0	0	0	0	0	0	0	0	0	0	0	0	0	0	0	0	0	0	0	0	0	0	0	0	0	0	0	0	0	0	0	0	0	0	0	0
Cronobacter_muytjensii	virulence_plasmid	CmuyJZ38_p2	hypothetical_protein_120	0	0	0	0	0	0	0	0	0	0	0	0	0	0	0	0	0	0	0	0	0	0	0	0	0	0	0	0	0	0	0	0	0	0	0	0	0	0	0	0	0	0	0	0	0	0
Cronobacter_muytjensii	virulence_plasmid	CmuyJZ38_p2	hypothetical_protein_126	0	0	0	0	0	0	0	0	0	0	0	0	0	0	0	0	0	0	0	0	0	0	0	0	0	0	0	0	0	0	0	0	0	0	0	0	0	0	0	0	0	0	0	0	0	0
Cronobacter_muytjensii	virulence_plasmid	CmuyJZ38_p2	hypothetical_protein_132	0	0	0	0	0	0	0	0	0	0	0	0	0	0	0	0	0	0	0	0	0	0	0	0	0	0	0	0	0	0	0	0	0	0	0	0	0	0	0	0	0	0	0	0	0	0
Cronobacter_muytjensii	virulence_plasmid	CmuyJZ38_p2	hypothetical_protein_135	0	0	0	0	0	0	0	0	0	0	0	0	0	0	0	0	0	0	0	0	0	0	0	0	0	0	0	0	0	0	0	0	0	0	0	0	0	0	0	0	0	0	0	0	0	0
Cronobacter_muytjensii	virulence_plasmid	CmuyJZ38_p2	hypothetical_protein_141	0	0	0	0	0	0	0	0	0	0	0	0	0	0	0	0	0	0	0	0	0	0	0	0	0	0	0	0	0	0	0	0	0	0	0	0	0	0	0	0	0	0	0	0	0	0
Cronobacter_muytjensii	virulence_plasmid	CmuyJZ38_p2	hypothetical_protein_144	0	0	0	0	0	0	0	0	0	0	0	0	0	0	0	0	0	0	0	0	0	0	0	0	0	0	0	0	0	0	0	0	0	0	0	0	0	0	0	0	0	0	0	0	0	0
Cronobacter_muytjensii	virulence_plasmid	CmuyJZ38_p2	hypothetical_protein_147	0	0	0	0	0	0	0	0	0	0	0	0	0	0	0	0	0	0	0	0	0	0	0	0	0	0	0	0	0	0	0	0	0	0	0	0	0	0	0	0	0	0	0	0	0	0
Cronobacter_muytjensii	virulence_plasmid	CmuyJZ38_p2	hypothetical_protein_153	0	0	0	0	0	0	0	0	0	0	0	0	0	0	0	0	0	0	0	0	0	0	0	0	0	0	0	0	0	0	0	0	0	0	0	0	0	0	0	0	0	0	0	0	0	0
Cronobacter_muytjensii	virulence_plasmid	CmuyJZ38_p2	hypothetical_protein_1578	0	0	0	0	0	0	0	0	0	0	0	0	0	0	0	0	0	0	0	0	0	0	0	0	0	0	0	0	0	0	0	0	0	0	0	0	0	0	0	0	0	0	0	0	0	0
Cronobacter_muytjensii	virulence_plasmid	CmuyJZ38_p2	hypothetical_protein_168	0	0	0	0	0	0	0	0	0	0	0	0	0	0	0	0	0	0	0	0	0	0	0	0	0	0	0	0	0	0	0	0	0	0	0	0	0	0	0	0	0	0	0	0	0	0
Cronobacter_muytjensii	virulence_plasmid	CmuyJZ38_p2	hypothetical_protein_195	0	0	0	0	0	0	0	0	0	0	0	0	0	0	0	0	0	0	0	0	0	0	0	0	0	0	0	0	0	0	0	0	0	0	0	0	0	0	0	0	0	0	0	0	0	0
Cronobacter_muytjensii	virulence_plasmid	CmuyJZ38_p2	hypothetical_protein_213	0	0	0	0	0	0	0	0	0	0	0	0	0	0	0	0	0	0	0	0	0	0	0	0	0	0	0	0	0	0	0	0	0	0	0	0	0	0	0	0	0	0	0	0	0	0
Cronobacter_muytjensii	virulence_plasmid	CmuyJZ38_p2	hypothetical_protein_2247	0	0	0	0	0	0	0	0	0	0	0	0	0	0	0	0	0	0	0	0	0	0	0	0	0	0	0	0	0	0	0	0	0	0	0	0	0	0	0	0	0	0	0	0	0	0
Cronobacter_muytjensii	virulence_plasmid	CmuyJZ38_p2	hypothetical_protein_225	85.71	85.71	87.68	88.15	87.68	88.04	87.68	87.56	87.68	87.68	88.15	88.15	88.15	0	0	87.68	0	0	87.2	86.12	0	88.04	0	0	0	0	0	0	0	0	0	0	0	0	0	0	0	0	0	0	0	0	0	0	0	0
Cronobacter_muytjensii	virulence_plasmid	CmuyJZ38_p2	hypothetical_protein_252	0	0	0	0	0	0	0	0	0	0	0	0	0	0	0	0	0	0	0	0	0	0	0	0	0	0	0	0	0	0	0	0	0	0	0	0	0	0	0	0	0	0	0	0	0	0
Cronobacter_muytjensii	virulence_plasmid	CmuyJZ38_p2	hypothetical_protein_267	0	0	0	0	0	0	0	0	0	0	0	0	0	0	0	0	0	0	0	0	0	0	0	0	0	0	0	0	0	0	0	0	0	0	0	0	0	0	0	0	0	0	0	0	0	0
Cronobacter_muytjensii	virulence_plasmid	CmuyJZ38_p2	hypothetical_protein_276	0	0	0	0	0	0	0	0	0	0	0	0	0	0	0	0	0	0	0	0	0	0	0	0	0	0	0	0	0	0	0	0	0	0	0	0	0	0	0	0	0	0	0	0	0	0
Cronobacter_muytjensii	virulence_plasmid	CmuyJZ38_p2	hypothetical_protein_312	0	0	0	0	0	0	0	0	0	0	0	0	0	0	0	0	0	0	0	0	0	0	0	0	0	0	0	0	0	0	0	0	0	0	0	0	0	0	0	0	0	0	0	0	0	0
Cronobacter_muytjensii	virulence_plasmid	CmuyJZ38_p2	hypothetical_protein_324	0	0	0	0	0	0	0	0	0	0	0	0	0	0	0	0	0	0	0	0	0	0	0	0	0	0	0	0	0	0	0	0	0	0	0	0	0	0	0	0	0	0	0	0	0	0
Cronobacter_muytjensii	virulence_plasmid	CmuyJZ38_p2	hypothetical_protein_357	0	0	0	0	0	0	0	0	88.8	0	0	0	0	0	0	0	0	89.64	0	0	0	0	0	0	0	0	0	0	0	0	0	0	0	0	0	0	0	0	0	0	0	0	0	0	0	0
Cronobacter_muytjensii	virulence_plasmid	CmuyJZ38_p2	hypothetical_protein_372	0	0	0	95.16	0	0	0	0	0	0	0	0	0	0	0	95.43	0	0	0	0	0	0	0	0	0	0	0	0	0	0	0	0	0	0	0	0	0	0	0	0	0	0	0	0	0	0
Cronobacter_muytjensii	virulence_plasmid	CmuyJZ38_p2	hypothetical_protein_399	0	0	0	0	0	0	0	0	0	0	0	0	0	0	0	0	0	0	0	0	0	0	0	0	0	0	0	0	0	0	0	0	0	0	0	0	0	0	0	0	0	0	0	0	0	0
Cronobacter_muytjensii	virulence_plasmid	CmuyJZ38_p2	hypothetical_protein_408	0	0	0	0	0	0	0	0	0	0	0	0	0	0	0	0	0	0	0	0	0	0	0	0	0	0	0	0	0	0	0	0	0	0	0	0	0	0	0	0	0	0	0	0	0	0
Cronobacter_muytjensii	virulence_plasmid	CmuyJZ38_p2	hypothetical_protein_420	0	0	0	0	0	0	0	0	0	0	0	0	0	0	0	0	0	0	0	0	0	0	0	0	0	0	0	0	0	0	0	0	0	0	0	0	0	0	0	0	0	0	0	0	0	0
Cronobacter_muytjensii	virulence_plasmid	CmuyJZ38_p2	hypothetical_protein_450	0	0	0	0	0	0	0	0	0	0	0	0	0	0	0	0	0	0	0	0	0	0	0	0	0	0	0	0	0	0	0	0	0	0	0	0	0	0	0	0	0	0	0	0	0	0
Cronobacter_muytjensii	virulence_plasmid	CmuyJZ38_p2	hypothetical_protein_489	0	0	0	0	0	0	0	0	0	0	0	0	0	0	0	0	0	0	0	0	0	0	0	0	0	0	0	0	0	0	0	0	0	0	0	0	0	0	0	0	0	0	0	0	0	0
Cronobacter_muytjensii	virulence_plasmid	CmuyJZ38_p2	hypothetical_protein_771	0	0	0	0	0	0	0	0	0	0	0	0	0	0	0	0	0	0	0	0	0	0	0	0	0	0	0	0	0	0	0	0	0	0	0	0	0	0	0	0	0	0	0	0	0	0
Cronobacter_muytjensii	virulence_plasmid	CmuyJZ38_p2	hypothetical_protein_777	0	0	91.14	0	90.89	0	100	90.89	0	91.01	0	0	0	0	0	90.87	90.76	91.01	91.01	91.18	91.32	0	0	0	0	0	0	0	0	0	0	0	0	0	0	0	0	0	0	0	0	0	0	0	0	0
Cronobacter_muytjensii	virulence_plasmid	CmuyJZ38_p2	hypothetical_protein_813	0	0	0	0	0	0	0	0	0	0	0	0	0	0	0	0	0	0	0	0	0	0	0	0	0	0	0	0	0	0	0	0	0	0	0	0	0	0	0	0	0	0	0	0	0	0
Cronobacter_muytjensii	virulence_plasmid	CmuyJZ38_p2	hypothetical_protein_972	0	0	0	0	0	0	0	0	0	0	0	0	0	0	0	0	0	0	0	0	0	0	0	0	0	0	0	0	0	0	0	0	0	0	0	0	0	0	0	0	0	0	0	0	0	0
Cronobacter_muytjensii	virulence_plasmid	CmuyJZ38_p2	probable_integral_membrane_protein_NMA1777	0	0	0	0	0	0	0	0	0	0	0	0	0	0	0	0	0	0	0	0	0	0	0	0	0	0	0	0	0	0	0	0	0	0	0	0	0	0	0	0	0	0	0	0	0	0
Cronobacter_muytjensii	virulence_plasmid	CmuyJZ38_p2	putative_acetyltransferase	0	0	0	0	0	0	0	0	0	0	0	0	0	0	0	0	0	0	0	0	0	0	0	0	0	0	0	0	0	0	0	0	0	0	0	0	0	0	0	0	0	0	0	0	0	0
Cronobacter_muytjensii	virulence_plasmid	CmuyJZ38_p2	serine/threonine_kinase	0	0	0	0	0	0	0	0	0	0	0	0	0	0	0	0	0	0	0	0	0	0	0	0	0	0	0	0	0	0	0	0	0	0	0	0	0	0	0	0	0	0	0	0	0	0
Cronobacter_sakazakii	Conjugation-TypeIV	pESA2	ATPase	0	0	0	0	0	0	0	0	0	0	0	0	0	0	0	0	0	0	0	0	0	0	0	0	0	0	0	0	0	0	0	0	0	0	0	0	0	0	0	0	0	0	0	0	0	0
Cronobacter_sakazakii	Conjugation-TypeIV	pESA2	Cag_pathogenicity_island_protein_Cag12	0	0	0	0	0	0	0	0	0	0	0	0	0	0	0	0	0	0	0	0	0	0	0	0	0	0	0	0	0	0	0	0	0	0	0	0	0	0	0	0	0	0	0	0	0	0
Cronobacter_sakazakii	Conjugation-TypeIV	pESA2	DNA_(cytosine-5-)-methyltransferase	0	0	0	0	0	0	0	0	0	0	0	0	0	0	0	0	0	0	0	0	0	0	0	0	0	0	0	0	0	0	0	0	0	0	0	0	0	0	0	0	0	0	0	0	0	0
Cronobacter_sakazakii	Conjugation-TypeIV	pESA2	DUF86_domain-containing_protein	0	0	0	0	0	0	0	0	0	0	0	0	0	0	0	0	0	0	0	0	0	0	0	0	0	0	0	0	0	0	0	0	0	0	0	0	0	0	0	0	0	0	0	0	0	0
Cronobacter_sakazakii	Conjugation-TypeIV	pESA2	EexN_family_lipoprotein	0	0	0	0	0	0	0	0	0	0	0	0	0	0	0	0	0	0	0	0	0	0	0	0	0	0	0	0	0	0	0	0	0	0	0	0	0	0	0	0	0	0	0	0	0	0
Cronobacter_sakazakii	Conjugation-TypeIV	pESA2	Minor_pilin_of_type_IV_secretion_complex_(VirB5)	0	0	0	0	0	0	0	0	0	0	0	0	0	0	0	0	0	0	0	0	0	0	0	0	0	0	0	0	0	0	0	0	0	0	0	0	0	0	0	0	0	0	0	0	0	0
Cronobacter_sakazakii	Conjugation-TypeIV	pESA2	P-type_DNA_transfer_ATPase_VirB11	0	0	0	0	0	0	0	0	0	0	0	0	0	0	0	0	0	0	0	0	0	0	0	0	0	0	0	0	0	0	0	0	0	0	0	0	0	0	0	0	0	0	0	0	0	0
Cronobacter_sakazakii	Conjugation-TypeIV	pESA2	P-type_conjugative_transfer_protein_VirB9	0	0	0	0	0	0	0	0	0	0	0	0	0	0	0	0	0	0	0	0	0	0	0	0	0	0	0	0	0	0	0	0	0	0	0	0	0	0	0	0	0	0	0	0	0	0
Cronobacter_sakazakii	Conjugation-TypeIV	pESA2	ParA_family_protein	0	0	0	0	0	0	0	0	0	0	0	0	0	0	0	0	0	0	0	0	0	0	0	0	0	0	0	0	0	0	0	0	0	0	0	0	0	0	0	0	0	0	0	0	0	0
Cronobacter_sakazakii	Conjugation-TypeIV	pESA2	RepA_protein	0	0	0	0	0	0	0	0	0	0	0	0	0	0	0	0	0	0	0	0	0	0	0	0	0	0	0	0	0	0	0	0	0	0	0	0	0	0	0	0	0	0	0	0	0	0
Cronobacter_sakazakii	Conjugation-TypeIV	pESA2	Tn3-like_element_ISPa38_family_transposase	0	0	0	0	0	0	0	0	0	0	0	0	0	0	0	0	0	0	0	0	0	0	0	0	0	0	0	0	0	0	0	0	0	0	0	0	0	0	0	0	0	0	0	0	0	0
Cronobacter_sakazakii	Conjugation-TypeIV	pESA2	TrbC/VirB2_family_protein/TriB_protein	0	0	0	0	0	0	0	0	0	0	0	0	0	0	0	0	0	0	0	0	0	0	0	0	0	0	0	0	0	0	0	0	0	0	0	0	0	0	0	0	0	0	0	0	0	0
Cronobacter_sakazakii	Conjugation-TypeIV	pESA2	TypeIV_secretion_system_protein	0	0	0	0	0	0	0	0	0	0	0	0	0	0	0	0	0	0	0	0	0	0	0	0	0	0	0	0	0	0	0	0	0	0	0	0	0	0	0	0	0	0	0	0	0	0
Cronobacter_sakazakii	Conjugation-TypeIV	pESA2	XRE_family_transcriptional_regulator	0	0	0	0	0	0	0	0	0	0	0	0	0	0	0	0	0	0	0	0	0	0	0	0	0	0	0	0	0	0	0	0	0	0	0	0	0	0	0	0	0	0	0	0	0	0
Cronobacter_sakazakii	Conjugation-TypeIV	pESA2	chromosome_partitioning_protein_ParB	0	0	0	0	0	0	0	0	0	0	0	0	0	0	0	0	0	0	0	0	0	0	0	0	0	0	0	0	0	0	0	0	0	0	0	0	0	0	0	0	0	0	0	0	0	0
Cronobacter_sakazakii	Conjugation-TypeIV	pESA2	cupin_domain-containing_protein	0	0	0	0	0	0	0	0	0	0	0	0	0	0	0	0	0	0	0	0	0	0	0	0	0	0	0	0	0	0	0	0	0	0	0	0	0	0	0	0	0	0	0	0	0	0
Cronobacter_sakazakii	Conjugation-TypeIV	pESA2	dpao_decarboxylase	0	0	0	0	0	0	0	0	0	0	0	0	0	0	0	0	0	0	0	0	0	0	0	0	0	0	0	0	0	0	0	0	0	0	0	0	0	0	0	0	0	0	0	0	0	0
Cronobacter_sakazakii	Conjugation-TypeIV	pESA2	hypothetical_protein_216	0	0	0	0	0	0	0	0	0	0	0	0	0	0	0	0	0	0	0	0	0	0	0	0	0	0	0	0	0	0	0	0	0	0	0	0	0	0	0	0	0	0	0	0	0	0
Cronobacter_sakazakii	Conjugation-TypeIV	pESA2	hypothetical_protein_222	0	0	0	0	0	0	0	0	0	0	0	0	0	0	0	0	0	0	0	0	0	0	0	0	0	0	0	0	0	0	0	0	0	0	0	0	0	0	0	0	0	0	0	0	0	0
Cronobacter_sakazakii	Conjugation-TypeIV	pESA2	hypothetical_protein_234	0	0	0	0	0	0	0	0	0	0	0	0	0	0	0	0	0	0	0	0	0	0	0	0	0	0	0	0	0	0	0	0	0	0	0	0	0	0	0	0	0	0	0	0	0	0
Cronobacter_sakazakii	Conjugation-TypeIV	pESA2	hypothetical_protein_297	0	0	0	0	0	0	0	0	0	0	0	0	0	0	0	0	0	0	0	0	0	0	0	0	0	0	0	0	0	0	0	0	0	0	0	0	0	0	0	0	0	0	0	0	0	0
Cronobacter_sakazakii	Conjugation-TypeIV	pESA2	hypothetical_protein_327	0	0	0	0	0	0	0	0	0	0	0	0	0	0	0	0	0	0	0	0	0	0	0	0	0	0	0	0	0	0	0	0	0	0	0	0	0	0	0	0	0	0	0	0	0	0
Cronobacter_sakazakii	Conjugation-TypeIV	pESA2	hypothetical_protein_328	0	0	0	0	0	0	0	0	0	0	0	0	0	0	0	0	0	0	0	0	0	0	0	0	0	0	0	0	0	0	0	0	0	0	0	0	0	0	0	0	0	0	0	0	0	0
Cronobacter_sakazakii	Conjugation-TypeIV	pESA2	hypothetical_protein_345	0	0	0	0	0	0	0	0	0	0	0	0	0	0	0	0	0	0	0	0	0	0	0	0	0	0	0	0	0	0	0	0	0	0	0	0	0	0	0	0	0	0	0	0	0	0
Cronobacter_sakazakii	Conjugation-TypeIV	pESA2	hypothetical_protein_372	0	0	0	0	0	0	0	0	0	0	0	0	0	0	0	0	0	0	0	0	0	0	0	0	0	0	0	0	0	0	0	0	0	0	0	0	0	0	0	0	0	0	0	0	0	0
Cronobacter_sakazakii	Conjugation-TypeIV	pESA2	hypothetical_protein_474	0	0	0	0	0	0	0	0	0	0	0	0	0	0	0	0	0	0	0	0	0	0	0	0	0	0	0	0	0	0	0	0	0	0	0	0	0	0	0	0	0	0	0	0	0	0
Cronobacter_sakazakii	Conjugation-TypeIV	pESA2	kikA_from_plasmid_origin	0	0	0	0	0	0	0	0	0	0	0	0	0	0	0	0	0	0	0	0	0	0	0	0	0	0	0	0	0	0	0	0	0	0	0	0	0	0	0	0	0	0	0	0	0	0
Cronobacter_sakazakii	Conjugation-TypeIV	pESA2	molybdopterin-guanine_dinucleotide_biosynthesis_protein_MobB	0	0	0	0	0	0	0	0	0	0	0	0	0	0	0	0	0	0	0	0	0	0	0	0	0	0	0	0	0	0	0	0	0	0	0	0	0	0	0	0	0	0	0	0	0	0
Cronobacter_sakazakii	Conjugation-TypeIV	pESA2	molybdopterin-guanine_dinucleotide_biosynthesis_protein_MobC	0	0	0	0	0	0	0	0	0	0	0	0	0	0	0	0	0	0	0	0	0	0	0	0	0	0	0	0	0	0	0	0	0	0	0	0	0	0	0	0	0	0	0	0	0	0
Cronobacter_sakazakii	Conjugation-TypeIV	pESA2	nucleotidyltransferase	0	0	0	0	0	0	0	0	0	0	0	0	0	0	0	0	0	0	0	0	0	0	0	0	0	0	0	0	0	0	0	0	0	0	0	0	0	0	0	0	0	0	0	0	0	0
Cronobacter_sakazakii	Conjugation-TypeIV	pESA2	phosphoribosyltransferase	0	0	0	0	0	0	0	0	0	0	0	0	0	0	0	0	0	0	0	0	0	0	0	0	0	0	0	0	0	0	0	0	0	0	0	0	0	0	0	0	0	0	0	0	0	0
Cronobacter_sakazakii	Conjugation-TypeIV	pESA2	recombinase_family_protein	0	0	0	0	0	0	0	0	0	0	0	0	0	0	0	0	0	0	0	0	0	0	0	0	0	0	0	0	0	0	0	0	0	0	0	0	0	0	0	0	0	0	0	0	0	0
Cronobacter_sakazakii	Conjugation-TypeIV	pESA2	restriction_endonuclease_Notl	0	0	0	0	0	0	0	0	0	0	0	0	0	0	0	0	0	0	0	0	0	0	0	0	0	0	0	0	0	0	0	0	0	0	0	0	0	0	0	0	0	0	0	0	0	0
Cronobacter_sakazakii	Conjugation-TypeIV	pESA2	transcriptional_antiterminator_NusG	0	0	0	0	0	0	0	0	0	0	0	0	0	0	0	0	0	0	0	0	0	0	0	0	0	0	0	0	0	0	0	0	0	0	0	0	0	0	0	0	0	0	0	0	0	0
Cronobacter_sakazakii	Conjugation-TypeIV	pESA2	transposase	0	0	0	0	0	0	0	0	0	0	0	0	0	0	0	0	0	0	0	0	0	0	0	0	0	0	0	0	0	0	0	0	0	0	0	0	0	0	0	0	0	0	0	0	0	0
Cronobacter_sakazakii	Conjugation-TypeIV	pESA2	type_IV_secretion_system_protein	0	0	0	0	0	0	0	0	0	0	0	0	0	0	0	0	0	0	0	0	0	0	0	0	0	0	0	0	0	0	0	0	0	0	0	0	0	0	0	0	0	0	0	0	0	0
Cronobacter_sakazakii	Conjugation-TypeIV	pESA2	type_VI_secretion_protein	0	0	0	0	0	0	0	0	0	0	0	0	0	0	0	0	0	0	0	0	0	0	0	0	0	0	0	0	0	0	0	0	0	0	0	0	0	0	0	0	0	0	0	0	0	0
Cronobacter_sakazakii	Conjugation-TypeIV	pGW1	2-oxo-tetronate_isomerase	0	0	0	0	0	0	0	0	0	0	0	0	0	0	0	0	0	0	0	0	0	0	0	0	0	0	0	0	0	0	0	0	0	0	0	0	0	0	0	0	0	0	0	0	0	0
Cronobacter_sakazakii	Conjugation-TypeIV	pGW1	5,10-methylenetetrahydrofolate_reductase	0	0	0	0	0	0	0	0	0	0	0	0	0	0	0	0	0	0	0	0	0	0	0	0	0	0	0	0	0	0	0	0	0	0	0	0	0	0	0	0	0	0	0	0	0	0
Cronobacter_sakazakii	Conjugation-TypeIV	pGW1	AAA_family_ATPase	0	0	0	0	0	0	0	0	0	0	0	0	0	0	0	0	0	0	0	0	0	0	0	0	0	0	0	0	0	0	0	0	0	0	0	0	0	0	0	0	0	0	0	0	0	0
Cronobacter_sakazakii	Conjugation-TypeIV	pGW1	AAC(3)-II_family_aminoglycoside_N-acetyltransferase	0	0	0	0	0	0	0	0	0	0	0	0	0	0	0	0	0	0	0	0	0	0	0	0	0	0	0	0	0	0	0	0	0	0	0	0	0	0	0	0	0	0	0	0	0	0
Cronobacter_sakazakii	Conjugation-TypeIV	pGW1	ANT(3'')-Ia_family_aminoglycoside_nucleotidyltransferase_AadA2	0	0	0	0	0	0	0	0	0	0	0	0	0	0	0	0	0	0	0	0	0	0	0	0	0	0	0	0	0	0	0	0	0	0	0	0	0	0	0	0	0	0	0	0	0	0
Cronobacter_sakazakii	Conjugation-TypeIV	pGW1	ATP-dependent_helicase	0	0	0	0	0	0	0	0	0	0	0	0	0	0	0	0	0	0	0	0	0	0	0	0	0	0	0	0	0	0	0	0	0	0	0	0	0	0	0	0	0	0	0	0	0	0
Cronobacter_sakazakii	Conjugation-TypeIV	pGW1	ATP/GTP-binding_protein	0	0	0	0	0	0	0	0	0	0	0	0	0	0	0	0	0	0	0	0	0	0	0	0	0	0	0	0	0	0	0	0	0	0	0	0	0	0	0	0	0	0	0	0	0	0
Cronobacter_sakazakii	Conjugation-TypeIV	pGW1	DDE-type_integrase/transposase/recombinase	0	0	0	0	0	0	0	0	0	0	0	0	0	0	0	0	0	0	0	0	0	0	0	0	0	0	0	0	0	0	0	0	0	0	0	0	0	0	0	0	0	0	0	0	0	0
Cronobacter_sakazakii	Conjugation-TypeIV	pGW1	DNA-binding_protein	0	0	0	0	0	0	0	0	0	0	0	0	0	0	0	0	0	0	0	0	0	0	0	0	0	0	0	0	0	0	0	0	0	0	0	0	0	0	0	0	0	0	0	0	0	0
Cronobacter_sakazakii	Conjugation-TypeIV	pGW1	DNA_cytosine_methyltransferase	0	0	0	0	0	0	0	0	0	0	0	0	0	0	0	0	0	0	0	0	0	0	0	0	0	0	0	0	0	0	0	0	0	0	0	0	0	0	100	0	0	0	0	0	0	0
Cronobacter_sakazakii	Conjugation-TypeIV	pGW1	DNA_replication_protein	0	0	0	0	0	0	0	0	0	0	0	0	0	0	0	0	0	0	0	0	0	0	0	0	0	0	0	0	0	0	0	0	0	0	0	0	0	0	0	0	0	0	0	0	0	0
Cronobacter_sakazakii	Conjugation-TypeIV	pGW1	DUF1173_family_protein	0	0	0	0	0	0	0	0	0	0	0	0	0	0	0	0	0	0	0	0	0	0	0	0	0	0	0	0	0	0	0	0	0	0	0	0	0	0	0	0	0	0	0	0	0	0
Cronobacter_sakazakii	Conjugation-TypeIV	pGW1	DUF3085_domain-containing_protein	0	0	0	0	0	0	0	0	0	0	0	0	0	0	0	0	0	0	0	0	0	0	0	0	0	0	0	0	0	0	0	0	0	0	0	0	0	0	0	0	0	0	0	0	0	0
Cronobacter_sakazakii	Conjugation-TypeIV	pGW1	DUF3150_domain-containing_protein	0	0	0	0	0	0	0	0	0	0	0	0	0	0	0	0	0	0	0	0	0	0	0	0	0	0	0	0	0	0	0	0	0	0	0	0	0	0	0	0	0	0	0	0	0	0
Cronobacter_sakazakii	Conjugation-TypeIV	pGW1	DUF3330_domain-containing_protein	0	0	0	0	0	0	0	0	0	0	0	0	0	0	0	0	0	0	0	0	0	0	0	0	0	0	0	0	0	0	0	0	0	0	0	0	0	0	0	0	0	0	0	0	0	0
Cronobacter_sakazakii	Conjugation-TypeIV	pGW1	DUF3883_domain-containing_protein	0	0	0	0	0	0	0	0	0	0	0	0	0	0	0	0	0	0	0	0	0	0	0	0	0	0	0	0	0	0	0	0	0	0	0	0	0	0	0	0	0	0	0	0	0	0
Cronobacter_sakazakii	Conjugation-TypeIV	pGW1	DUF4102_domain-containing_protein	0	0	0	0	0	0	0	0	0	0	0	0	0	0	0	0	0	0	0	0	0	0	0	0	0	0	0	0	0	0	0	0	0	0	0	0	0	0	0	0	0	0	0	0	0	0
Cronobacter_sakazakii	Conjugation-TypeIV	pGW1	DUF4165_domain-containing_protein	0	0	0	0	0	0	0	0	0	0	0	0	0	0	0	0	0	0	0	0	0	0	0	0	0	0	0	0	0	0	0	0	0	0	0	0	0	0	0	0	0	0	0	0	0	0
Cronobacter_sakazakii	Conjugation-TypeIV	pGW1	DUF421_domain-containing_protein	0	0	0	0	0	0	0	0	0	0	0	0	0	0	0	0	0	0	0	0	0	0	0	0	0	0	0	0	0	0	0	0	0	0	0	0	0	0	0	0	0	0	0	0	0	0
Cronobacter_sakazakii	Conjugation-TypeIV	pGW1	DUF4225_domain-containing_protein	0	0	0	0	0	0	0	0	0	0	0	0	0	0	0	0	0	0	0	0	0	0	0	0	0	0	0	0	0	0	0	0	0	0	0	0	0	0	0	0	0	0	0	0	0	0
Cronobacter_sakazakii	Conjugation-TypeIV	pGW1	DUF4236_domain-containing_protein	0	0	0	0	0	0	0	0	0	0	0	0	0	0	0	0	0	0	0	0	0	0	0	0	0	0	0	0	0	0	0	0	0	0	0	0	0	0	0	0	0	0	0	0	0	0
Cronobacter_sakazakii	Conjugation-TypeIV	pGW1	DUF4400_domain-containing_protein	0	0	0	0	0	0	0	0	0	0	0	0	0	0	0	0	0	0	0	0	0	0	0	0	0	0	0	0	0	0	0	0	0	0	0	0	0	0	0	0	0	0	0	0	0	0
Cronobacter_sakazakii	Conjugation-TypeIV	pGW1	DUF4942_domain-containing_protein	0	0	0	0	0	0	0	0	0	0	0	0	0	0	0	0	0	0	0	0	0	0	0	0	0	0	0	0	0	0	0	0	0	0	0	0	0	0	0	0	0	0	0	0	0	0
Cronobacter_sakazakii	Conjugation-TypeIV	pGW1	DUF5417_domain-containing_protein	0	0	0	0	0	0	0	0	0	0	0	0	0	0	0	0	0	0	0	0	0	0	0	0	0	0	0	0	0	0	0	0	0	0	0	0	0	0	0	0	0	0	0	0	0	0
Cronobacter_sakazakii	Conjugation-TypeIV	pGW1	DUF86_domain-containing_protein	0	0	0	0	0	0	0	0	0	0	0	0	0	0	0	0	0	0	0	0	0	0	0	0	0	0	0	0	0	0	0	0	0	0	0	0	0	0	0	0	0	0	0	0	0	0
Cronobacter_sakazakii	Conjugation-TypeIV	pGW1	DUF957_domain-containing_protein	0	0	0	0	0	0	0	0	0	0	0	0	0	0	0	0	0	0	0	0	0	0	0	0	0	0	0	0	0	0	0	0	0	0	0	0	0	0	0	0	0	0	0	0	0	0
Cronobacter_sakazakii	Conjugation-TypeIV	pGW1	Dam_family_site-specific_DNA-(adenine-N6)-methyltransferase	0	0	0	0	0	0	0	0	0	0	0	0	0	0	0	0	0	0	0	0	0	0	0	0	0	0	0	0	0	0	0	0	0	0	0	0	0	0	0	0	0	0	0	0	0	0
Cronobacter_sakazakii	Conjugation-TypeIV	pGW1	DsbA_family_protein	0	0	0	0	0	0	0	0	0	0	0	0	0	0	0	0	0	0	0	0	0	0	0	0	0	0	0	0	0	0	0	0	0	0	0	0	0	0	0	0	0	0	0	0	0	0
Cronobacter_sakazakii	Conjugation-TypeIV	pGW1	DsbC_family_protein	0	0	0	0	0	0	0	0	0	0	0	0	0	0	0	0	0	0	0	0	0	0	0	0	0	0	0	0	0	0	0	0	0	0	0	0	0	0	0	0	0	0	0	0	0	0
Cronobacter_sakazakii	Conjugation-TypeIV	pGW1	EAL_domain-containing_protein	0	0	0	0	0	0	0	0	0	0	0	0	0	0	0	0	0	0	0	0	0	0	0	0	0	0	0	0	0	0	0	0	0	0	0	0	0	0	0	0	0	0	0	0	0	0
Cronobacter_sakazakii	Conjugation-TypeIV	pGW1	GNAT_family_N-acetyltransferase	0	0	0	0	0	0	0	0	0	0	0	0	0	0	0	0	0	0	0	0	0	0	0	0	0	0	0	0	0	0	0	0	0	0	0	0	0	0	0	0	0	0	0	0	0	0
Cronobacter_sakazakii	Conjugation-TypeIV	pGW1	H-NS_histone_family_protein	0	0	0	0	0	0	0	0	0	0	0	0	0	0	0	0	0	0	0	0	0	0	0	0	0	0	0	0	0	0	0	0	0	0	0	0	0	0	0	0	0	0	0	0	0	0
Cronobacter_sakazakii	Conjugation-TypeIV	pGW1	HNH_endonuclease	0	0	0	0	0	0	0	0	0	0	0	0	0	0	0	0	0	0	0	0	0	0	0	0	0	0	0	0	0	0	0	0	0	0	0	0	0	0	0	0	0	0	0	0	0	0
Cronobacter_sakazakii	Conjugation-TypeIV	pGW1	HpcH/HpaI_aldolase/citrate_lyase_family_protein	0	0	0	0	0	0	0	0	0	0	0	0	0	0	0	0	0	0	0	0	0	0	0	0	0	0	0	0	0	0	0	0	0	0	0	0	0	0	0	0	0	0	0	0	0	0
Cronobacter_sakazakii	Conjugation-TypeIV	pGW1	IS110-like_element_IS4321_family_transposase	0	0	0	0	0	0	0	0	0	0	0	0	0	0	0	0	0	0	0	0	0	0	0	0	0	0	0	0	0	0	0	0	0	0	0	0	0	0	0	0	0	0	0	0	0	0
Cronobacter_sakazakii	Conjugation-TypeIV	pGW1	IS110-like_element_IS5075_family_transposase	0	0	0	0	0	0	0	0	0	0	0	0	0	0	0	0	0	0	0	0	0	0	0	0	0	0	0	0	0	0	0	0	0	0	0	0	0	0	0	0	0	0	0	0	0	0
Cronobacter_sakazakii	Conjugation-TypeIV	pGW1	IS110_family_transposase	0	0	0	0	0	0	0	0	0	0	0	0	0	0	0	0	0	0	0	0	0	0	0	0	0	0	0	0	0	0	0	0	0	0	0	0	0	0	0	0	0	0	0	0	0	0
Cronobacter_sakazakii	Conjugation-TypeIV	pGW1	IS1182-like_element_ISCfr1_family_transposase	0	0	0	0	0	0	0	0	0	0	0	0	0	0	0	0	0	0	0	0	0	0	0	0	0	0	0	0	0	0	0	0	0	0	0	0	0	0	0	0	0	0	0	0	0	0
Cronobacter_sakazakii	Conjugation-TypeIV	pGW1	IS1380-like_element_IS1247_family_transposase	0	0	0	0	0	0	0	0	0	0	0	0	0	0	0	0	0	0	0	0	0	0	0	0	0	0	0	0	0	0	0	0	0	0	0	0	0	0	0	0	0	0	0	0	0	0
Cronobacter_sakazakii	Conjugation-TypeIV	pGW1	IS1_family_transposase	0	0	0	0	0	0	0	0	0	0	0	0	0	0	0	0	0	0	0	100	100	0	100	0	0	100	100	100	100	100	100	100	0	100	0	0	0	0	100	0	100	100	0	0	100	0
Cronobacter_sakazakii	Conjugation-TypeIV	pGW1	IS3-like_element_ISKpn8_family_transposase	0	0	0	0	0	0	0	0	0	0	0	0	0	0	0	0	0	0	0	0	0	0	0	0	0	0	0	0	0	0	0	0	0	0	0	0	0	0	0	0	0	0	0	0	0	0
Cronobacter_sakazakii	Conjugation-TypeIV	pGW1	IS3_family_transposase	0	87.34	100	87.27	84.51	84.6	84.34	86.12	0	84.34	0	87.53	0	0	89.18	85.49	0	0	87.09	0	0	100	84.49	84.49	84.49	84.49	84.49	84.49	84.49	84.49	84.49	84.49	84.49	84.49	0	0	0	0	0	0	86.91	86.91	0	0	0	83.91
Cronobacter_sakazakii	Conjugation-TypeIV	pGW1	IS5-like_element_IS903B_family_transposase	0	0	0	0	0	0	0	0	0	0	0	0	0	0	0	0	0	0	0	0	0	0	0	0	0	0	0	0	0	0	0	0	0	0	0	0	0	0	0	0	0	0	0	0	100	0
Cronobacter_sakazakii	Conjugation-TypeIV	pGW1	IS5-like_element_ISKpn26_family_transposase	0	0	0	0	0	0	0	0	0	0	0	0	0	0	0	0	0	0	0	0	0	0	0	0	0	0	0	0	0	0	0	0	0	0	0	0	0	0	0	0	0	0	0	0	0	0
Cronobacter_sakazakii	Conjugation-TypeIV	pGW1	IS5/IS1182_family_transposase	0	0	0	0	0	0	0	0	0	0	0	0	0	0	0	0	0	0	0	0	0	0	0	0	0	0	0	0	0	0	0	0	0	0	0	0	0	0	0	0	0	0	0	0	0	0
Cronobacter_sakazakii	Conjugation-TypeIV	pGW1	IS5_family_transposase	0	0	0	0	0	0	0	0	0	0	0	0	0	0	0	0	0	0	0	0	0	0	0	0	0	0	0	0	0	0	0	0	0	0	0	0	0	0	0	0	0	0	0	0	0	0
Cronobacter_sakazakii	Conjugation-TypeIV	pGW1	IS6-like_element_IS26_family_transposase	0	0	0	0	0	0	0	0	0	0	0	0	0	0	0	0	0	0	0	0	0	0	0	0	0	0	0	0	0	0	0	0	0	0	0	0	0	0	0	0	0	0	0	0	0	0
Cronobacter_sakazakii	Conjugation-TypeIV	pGW1	IS6-like_element_IS6100_family_transposase	0	0	0	0	0	0	0	0	0	0	0	0	0	0	0	0	0	0	0	0	0	0	0	0	0	0	0	0	0	0	0	0	0	0	0	0	0	0	0	0	0	0	0	0	0	0
Cronobacter_sakazakii	Conjugation-TypeIV	pGW1	IS91_family_transposase	0	0	0	0	0	0	0	0	0	0	0	0	0	0	0	0	0	0	0	0	0	0	0	0	0	0	0	0	0	0	0	0	0	0	0	0	0	0	0	0	0	0	0	0	0	0
Cronobacter_sakazakii	Conjugation-TypeIV	pGW1	ISNCY-like_element_ISKpn21_family_transposase	0	0	0	0	0	0	0	0	0	0	0	0	0	0	0	0	0	0	0	0	0	0	0	0	0	0	0	0	0	0	0	0	0	0	0	0	0	0	0	0	0	0	0	0	0	0
Cronobacter_sakazakii	Conjugation-TypeIV	pGW1	ISNCY_family_transposase	0	0	0	0	0	0	0	0	0	0	0	0	0	0	0	0	0	0	0	0	0	0	0	0	0	0	0	0	0	0	0	0	0	0	0	0	0	0	0	0	0	0	0	0	0	0
Cronobacter_sakazakii	Conjugation-TypeIV	pGW1	KikA	0	0	0	0	0	0	0	0	0	0	0	0	0	0	0	0	0	0	0	0	0	0	0	0	0	0	0	0	0	0	0	0	0	0	0	0	0	0	0	0	0	0	0	0	0	0
Cronobacter_sakazakii	Conjugation-TypeIV	pGW1	LysR_family_transcriptional_regulator	0	0	0	0	0	0	0	0	0	0	0	0	0	0	0	0	0	0	0	0	0	0	0	0	0	0	0	0	0	0	0	0	0	0	0	0	0	0	0	0	0	0	0	0	0	0
Cronobacter_sakazakii	Conjugation-TypeIV	pGW1	MFS_transporter	0	0	0	0	0	0	0	0	0	0	0	0	0	0	0	0	0	0	0	0	0	0	0	0	0	0	0	0	0	0	0	0	0	0	0	0	0	0	0	0	0	0	0	0	0	0
Cronobacter_sakazakii	Conjugation-TypeIV	pGW1	NAD(+)--rifampin_ADP-ribosyltransferase	0	0	0	0	0	0	0	0	0	0	0	0	0	0	0	0	0	0	0	0	0	0	0	0	0	0	0	0	0	0	0	0	0	0	0	0	0	0	0	0	0	0	0	0	0	0
Cronobacter_sakazakii	Conjugation-TypeIV	pGW1	NERD_domain-containing_protein	0	0	0	0	0	0	0	0	0	0	0	0	0	0	0	0	0	0	0	0	0	0	0	0	0	0	0	0	0	0	0	0	0	0	0	0	0	0	0	0	0	0	0	0	0	0
Cronobacter_sakazakii	Conjugation-TypeIV	pGW1	NTP-binding_protein	0	0	0	0	0	0	0	0	0	0	0	0	0	0	0	0	0	0	0	0	0	0	0	0	0	0	0	0	0	0	0	0	0	0	0	0	0	0	0	0	0	0	0	0	0	0
Cronobacter_sakazakii	Conjugation-TypeIV	pGW1	ParA_family_protein	0	0	0	0	0	0	0	0	0	0	0	0	0	0	0	0	0	0	0	0	0	0	0	0	0	0	0	0	0	0	0	0	0	0	0	0	0	0	0	0	0	0	0	0	0	0
Cronobacter_sakazakii	Conjugation-TypeIV	pGW1	ParB_N-terminal_domain-containing_protein	0	0	0	0	0	0	0	0	0	0	0	0	0	0	0	0	0	0	0	0	0	0	0	0	0	0	0	0	0	0	0	0	0	0	0	0	0	0	0	0	0	0	0	0	0	0
Cronobacter_sakazakii	Conjugation-TypeIV	pGW1	RepB_family_plasmid_replication_initiator_protein	0	0	0	0	0	0	0	0	0	0	0	0	0	0	0	0	0	0	0	0	0	0	0	0	0	0	0	0	0	0	0	0	0	0	0	0	0	0	0	0	0	0	0	0	0	0
Cronobacter_sakazakii	Conjugation-TypeIV	pGW1	S-(hydroxymethyl)glutathione_dehydrogenase/classIII_alcohol_dehydrogenase	0	0	0	0	0	0	0	0	0	0	0	0	0	0	0	0	0	0	0	0	0	0	0	0	0	0	0	0	0	0	0	0	0	0	0	0	0	0	0	0	0	0	0	0	0	0
Cronobacter_sakazakii	Conjugation-TypeIV	pGW1	S-formylglutathione_hydrolase	0	0	0	0	0	0	0	0	0	0	0	0	0	0	0	0	0	0	0	0	0	0	0	0	0	0	0	0	0	0	0	0	0	0	0	0	0	0	0	0	0	0	0	0	0	0
Cronobacter_sakazakii	Conjugation-TypeIV	pGW1	S49_family_peptidase	0	0	0	0	0	0	0	0	0	0	0	0	0	0	0	0	0	0	0	0	0	0	0	0	0	0	0	0	0	0	0	0	0	0	0	0	0	0	0	0	0	0	0	0	0	0
Cronobacter_sakazakii	Conjugation-TypeIV	pGW1	SAM-dependent_DNA_methyltransferase	0	0	0	0	0	0	0	0	0	0	0	0	0	0	0	0	0	0	0	0	0	0	0	0	0	0	0	0	0	0	0	0	0	0	0	0	0	0	0	0	0	0	0	0	0	0
Cronobacter_sakazakii	Conjugation-TypeIV	pGW1	SDR_family_oxidoreductase	0	0	0	0	0	0	0	0	0	0	0	0	0	0	0	0	0	0	0	0	0	0	0	0	0	0	0	0	0	0	0	0	0	0	0	0	0	0	0	0	0	0	0	0	0	0
Cronobacter_sakazakii	Conjugation-TypeIV	pGW1	SulP_family_inorganic_anion_transporter	0	0	0	0	0	0	0	0	0	0	0	0	0	0	0	0	0	0	0	0	0	0	0	0	0	0	0	0	0	0	0	0	0	0	0	0	0	0	0	0	0	0	0	0	0	78.61
Cronobacter_sakazakii	Conjugation-TypeIV	pGW1	TPA:_EAL_domain-containing_protein	0	0	0	0	0	0	0	0	0	0	0	0	0	0	0	0	0	0	0	0	0	0	0	0	0	0	0	0	0	0	0	0	0	0	0	0	0	0	0	0	0	0	0	0	0	0
Cronobacter_sakazakii	Conjugation-TypeIV	pGW1	TerD_family_protein	0	0	0	0	0	0	0	0	0	0	0	0	0	0	0	0	0	0	0	0	0	0	0	0	0	0	0	0	0	0	0	0	0	0	0	0	0	0	0	0	0	0	0	0	0	0
Cronobacter_sakazakii	Conjugation-TypeIV	pGW1	TetR/AcrR_family_transcriptional_regulator	0	0	0	0	0	0	0	0	0	0	0	0	0	0	0	0	0	0	0	0	0	0	0	0	0	0	0	0	0	0	0	0	0	0	0	0	0	0	0	0	0	0	0	0	0	0
Cronobacter_sakazakii	Conjugation-TypeIV	pGW1	Tn3_family_transposase	0	0	0	0	0	0	0	0	0	0	0	0	0	0	0	0	0	0	0	0	0	0	0	0	0	0	0	0	0	0	0	0	0	0	0	0	0	0	0	0	0	0	0	0	0	0
Cronobacter_sakazakii	Conjugation-TypeIV	pGW1	TniQ_family_protein	0	0	0	0	0	0	0	0	0	0	0	0	0	0	0	0	0	0	0	0	0	0	0	0	0	0	0	0	0	0	0	0	0	0	0	0	0	0	0	0	0	0	0	0	0	0
Cronobacter_sakazakii	Conjugation-TypeIV	pGW1	TraC_family_protein	0	0	0	0	0	0	0	0	0	0	0	0	0	0	0	0	0	0	0	0	0	0	0	0	0	0	0	0	0	0	0	0	0	0	0	0	0	0	0	0	0	0	0	0	0	0
Cronobacter_sakazakii	Conjugation-TypeIV	pGW1	TraV_family_lipoprotein	0	0	0	0	0	0	0	0	0	0	0	0	0	0	0	0	0	0	0	0	0	0	0	0	0	0	0	0	0	0	0	0	0	0	0	0	0	0	0	0	0	0	0	0	0	0
Cronobacter_sakazakii	Conjugation-TypeIV	pGW1	TrhK	0	0	0	0	0	0	0	0	0	0	0	0	0	0	0	0	0	0	0	0	0	0	0	0	0	0	0	0	0	0	0	0	0	0	0	0	0	0	0	0	0	0	0	0	0	0
Cronobacter_sakazakii	Conjugation-TypeIV	pGW1	VWA_domain-containing_protein	0	0	0	0	0	0	0	0	0	0	0	0	0	0	0	0	0	0	0	0	0	0	0	0	0	0	0	0	0	0	0	0	0	0	0	0	0	0	0	0	0	0	0	0	0	0
Cronobacter_sakazakii	Conjugation-TypeIV	pGW1	WbuC_family_cupin_fold_metalloprotein	0	0	0	0	0	0	0	0	0	0	0	0	0	0	0	0	0	0	0	0	0	0	0	0	0	0	0	0	0	0	0	0	0	0	0	0	0	0	0	0	0	0	0	0	0	0
Cronobacter_sakazakii	Conjugation-TypeIV	pGW1	YdeI_family_stress_tolerance_OB_fold_protein	0	0	0	0	0	0	0	0	0	0	0	0	0	0	0	0	0	0	0	0	0	0	0	0	0	0	0	0	0	0	0	0	0	0	0	0	0	0	0	0	0	0	0	0	0	0
Cronobacter_sakazakii	Conjugation-TypeIV	pGW1	aac(6')-IIc	0	0	0	0	0	0	0	0	0	0	0	0	0	0	0	0	0	0	0	0	0	0	0	0	0	0	0	0	0	0	0	0	0	0	0	0	0	0	0	0	0	0	0	0	0	0
Cronobacter_sakazakii	Conjugation-TypeIV	pGW1	adenine-specific_DNA-methyltransferase	0	0	0	0	0	0	0	0	0	0	0	0	0	0	0	0	0	0	0	0	0	0	0	0	0	0	0	0	0	0	0	0	0	0	0	0	0	0	0	0	0	0	0	0	0	0
Cronobacter_sakazakii	Conjugation-TypeIV	pGW1	adenine/guanine_phosphoribosyltransferase	0	0	0	0	0	0	0	0	0	0	0	0	0	0	0	0	0	0	0	0	0	0	0	0	0	0	0	0	0	0	0	0	0	0	0	0	0	0	0	0	0	0	0	0	0	0
Cronobacter_sakazakii	Conjugation-TypeIV	pGW1	alpha-2-macroglobulin_family_protein	0	0	0	0	0	0	0	0	0	0	0	0	0	0	0	0	0	0	0	0	0	0	0	0	0	0	0	0	0	0	0	0	0	0	0	0	0	0	0	0	0	0	0	0	0	0
Cronobacter_sakazakii	Conjugation-TypeIV	pGW1	aminoglycoside_N-acetyltransferase_AAC(3)-IId	0	0	0	0	0	0	0	0	0	0	0	0	0	0	0	0	0	0	0	0	0	0	0	0	0	0	0	0	0	0	0	0	0	0	0	0	0	0	0	0	0	0	0	0	0	0
Cronobacter_sakazakii	Conjugation-TypeIV	pGW1	aminoglycoside_O-phosphotransferase_APH(3')-Ia	0	0	0	0	0	0	0	0	0	0	0	0	0	0	0	0	0	0	0	0	0	0	0	0	0	0	0	0	0	0	0	0	0	0	0	0	0	0	0	0	0	0	0	0	0	0
Cronobacter_sakazakii	Conjugation-TypeIV	pGW1	aminoglycoside_O-phosphotransferase_APH(6)-Id	0	0	0	0	0	0	0	0	0	0	0	0	0	0	0	0	0	0	0	0	0	0	0	0	0	0	0	0	0	0	0	0	0	0	0	0	0	0	0	0	0	0	0	0	0	0
Cronobacter_sakazakii	Conjugation-TypeIV	pGW1	aph(3'')-Ib	0	0	0	0	0	0	0	0	0	0	0	0	0	0	0	0	0	0	0	0	0	0	0	0	0	0	0	0	0	0	0	0	0	0	0	0	0	0	0	0	0	0	0	0	0	0
Cronobacter_sakazakii	Conjugation-TypeIV	pGW1	arsC	0	0	0	0	0	0	0	0	0	0	0	0	0	0	0	0	0	0	0	0	0	0	0	0	0	0	0	0	0	0	0	0	0	0	0	0	0	0	0	0	0	0	0	0	0	0
Cronobacter_sakazakii	Conjugation-TypeIV	pGW1	arsH	0	0	0	0	0	0	0	0	0	0	0	0	0	0	0	0	0	0	0	0	0	0	0	0	0	0	0	0	0	0	0	0	0	0	0	0	0	0	0	0	0	0	0	0	0	0
Cronobacter_sakazakii	Conjugation-TypeIV	pGW1	arsenic_transporter	0	0	0	0	0	0	0	0	0	0	0	0	0	0	0	0	0	0	0	0	0	0	0	0	0	0	0	0	0	0	0	0	0	0	0	0	0	0	0	0	0	0	0	0	0	0
Cronobacter_sakazakii	Conjugation-TypeIV	pGW1	carbamoyl-phosphate_synthase_large_chain	0	0	0	0	0	0	0	0	0	0	0	0	0	0	0	0	0	0	0	0	0	0	0	0	0	0	0	0	0	0	0	0	0	0	0	0	0	0	0	0	0	0	0	0	0	0
Cronobacter_sakazakii	Conjugation-TypeIV	pGW1	cation_transporter	0	0	0	0	0	0	0	0	0	0	0	0	0	0	0	0	0	0	0	0	0	0	0	0	0	0	0	0	0	0	0	0	0	0	0	0	0	0	0	0	0	0	0	0	0	0
Cronobacter_sakazakii	Conjugation-TypeIV	pGW1	chrA	0	0	0	0	0	0	0	0	0	0	0	0	0	0	0	0	0	0	0	0	0	0	0	0	0	0	0	0	0	0	0	0	0	0	0	0	0	0	0	0	0	0	0	0	0	0
Cronobacter_sakazakii	Conjugation-TypeIV	pGW1	class_A_broad-spectrum_beta-lactamase_TEM-1	0	0	0	0	0	0	0	0	0	0	0	0	0	0	0	0	0	0	0	0	0	0	0	0	0	0	0	0	0	0	0	0	0	0	0	0	0	0	0	0	0	0	0	0	0	0
Cronobacter_sakazakii	Conjugation-TypeIV	pGW1	class_A_extended-spectrum_beta-lactamase_SFO-1	0	0	0	0	0	0	0	0	0	0	0	0	0	0	0	0	0	0	0	0	0	0	0	0	0	0	0	0	0	0	0	0	0	0	0	0	0	0	0	0	0	0	0	0	0	0
Cronobacter_sakazakii	Conjugation-TypeIV	pGW1	class_C_beta-lactamase_DHA-1	0	0	0	0	0	0	0	0	0	0	0	0	0	0	0	0	0	0	0	0	0	0	0	0	0	0	0	0	0	0	0	0	0	0	0	0	0	0	0	0	0	0	0	0	0	0
Cronobacter_sakazakii	Conjugation-TypeIV	pGW1	conjugal_transfer_protein	0	0	0	0	0	0	0	0	0	0	0	0	0	0	0	0	0	0	0	0	0	0	0	0	0	0	0	0	0	0	0	0	0	0	0	0	0	0	0	0	0	0	0	0	0	0
Cronobacter_sakazakii	Conjugation-TypeIV	pGW1	conjugal_transfer_protein_TraB	0	0	0	0	0	0	0	0	0	0	0	0	0	0	0	0	0	0	0	0	0	0	0	0	0	0	0	0	0	0	0	0	0	0	0	0	0	0	0	0	0	0	0	0	0	0
Cronobacter_sakazakii	Conjugation-TypeIV	pGW1	conjugal_transfer_protein_TraG	0	0	0	0	0	0	0	0	0	0	0	0	0	0	0	0	0	0	0	0	0	0	0	0	0	0	0	0	0	0	0	0	0	0	0	0	0	0	0	0	0	0	0	0	0	0
Cronobacter_sakazakii	Conjugation-TypeIV	pGW1	conjugal_transfer_protein_TraM	0	0	0	0	0	0	0	0	0	0	0	0	0	0	0	0	0	0	0	0	0	0	0	0	0	0	0	0	0	0	0	0	0	0	0	0	0	0	0	0	0	0	0	0	0	0
Cronobacter_sakazakii	Conjugation-TypeIV	pGW1	conjugal_transfer_protein_TraN	0	0	0	0	0	0	0	0	0	0	0	0	0	0	0	0	0	0	0	0	0	0	0	0	0	0	0	0	0	0	0	0	0	0	0	0	0	0	0	0	0	0	0	0	0	0
Cronobacter_sakazakii	Conjugation-TypeIV	pGW1	conjugal_transfer_protein_TraX	0	0	0	0	0	0	0	0	0	0	0	0	0	0	0	0	0	0	0	0	0	0	0	0	0	0	0	0	0	0	0	0	0	0	0	0	0	0	0	0	0	0	0	0	0	0
Cronobacter_sakazakii	Conjugation-TypeIV	pGW1	copper-binding_protein	0	0	0	0	0	0	0	0	0	0	0	0	0	0	0	0	0	0	0	0	0	0	0	0	0	0	0	0	0	0	0	0	0	0	0	0	0	0	0	0	0	0	0	0	0	0
Cronobacter_sakazakii	Conjugation-TypeIV	pGW1	cupin_domain-containing_protein	0	0	0	0	0	0	0	0	0	0	0	0	0	0	0	0	0	0	0	0	0	0	0	0	0	0	0	0	0	0	0	0	0	0	0	0	0	0	0	0	0	0	0	0	0	0
Cronobacter_sakazakii	Conjugation-TypeIV	pGW1	cysteine_protease_StiP_family_protein	0	0	0	0	0	0	0	0	0	0	0	0	0	0	0	0	0	0	0	0	0	0	0	0	0	0	0	0	0	0	0	0	0	0	0	0	0	0	0	0	0	0	0	0	0	0
Cronobacter_sakazakii	Conjugation-TypeIV	pGW1	cytochrome_b/b6_domain-containing_protein	0	0	0	0	0	0	0	0	0	0	0	0	0	0	0	0	0	0	0	0	0	0	0	0	0	0	0	0	0	0	0	0	0	0	0	0	0	0	0	0	0	0	0	0	0	0
Cronobacter_sakazakii	Conjugation-TypeIV	pGW1	dfrA12	0	0	0	0	0	0	0	0	0	0	0	0	0	0	0	0	0	0	0	0	0	0	0	0	0	0	0	0	0	0	0	0	0	0	0	0	0	0	0	0	0	0	0	0	0	0
Cronobacter_sakazakii	Conjugation-TypeIV	pGW1	dfrA19	0	0	0	0	0	0	0	0	0	0	0	0	0	0	0	0	0	0	0	0	0	0	0	0	0	0	0	0	0	0	0	0	0	0	0	0	0	0	0	0	0	0	0	0	0	0
Cronobacter_sakazakii	Conjugation-TypeIV	pGW1	ere(A)	0	0	0	0	0	0	0	0	0	0	0	0	0	0	0	0	0	0	0	0	0	0	0	0	0	0	0	0	0	0	0	0	0	0	0	0	0	0	0	0	0	0	0	0	0	0
Cronobacter_sakazakii	Conjugation-TypeIV	pGW1	ethidium_bromide_resistance_protein	0	0	0	0	0	0	0	0	0	0	0	0	0	0	0	0	0	0	0	0	0	0	0	0	0	0	0	0	0	0	0	0	0	0	0	0	0	0	0	0	0	0	0	0	0	0
Cronobacter_sakazakii	Conjugation-TypeIV	pGW1	flavin_reductase	0	0	0	0	0	0	0	0	0	0	0	0	0	0	0	0	0	0	0	0	0	0	0	0	0	0	0	0	0	0	0	0	0	0	0	0	0	0	0	0	100	100	0	0	100	0
Cronobacter_sakazakii	Conjugation-TypeIV	pGW1	glutathione_S-transferase	0	0	0	0	0	0	0	0	0	0	0	0	0	0	0	0	0	0	0	0	0	0	0	0	0	0	0	0	0	0	0	0	0	0	0	0	0	0	0	0	0	0	0	0	0	0
Cronobacter_sakazakii	Conjugation-TypeIV	pGW1	helicase	0	0	0	0	0	0	0	0	0	0	0	0	0	0	0	0	0	0	0	0	0	0	0	0	0	0	0	0	0	0	0	0	0	0	0	0	0	0	0	0	0	0	0	0	0	0
Cronobacter_sakazakii	Conjugation-TypeIV	pGW1	helix-turn-helix_domain-containing_protein	0	0	0	0	0	0	0	0	0	0	0	0	0	0	0	0	0	0	0	0	0	0	0	0	0	0	0	0	0	0	0	0	0	0	0	0	0	0	0	0	0	0	0	0	0	0
Cronobacter_sakazakii	Conjugation-TypeIV	pGW1	helix-turn-helix_domain_containing_protein	0	0	0	0	0	0	0	0	0	0	0	0	0	0	0	0	0	0	0	0	0	0	0	0	0	0	0	0	0	0	0	0	0	0	0	0	0	0	0	0	0	0	0	0	0	0
Cronobacter_sakazakii	Conjugation-TypeIV	pGW1	htdF	0	0	0	0	0	0	0	0	0	0	0	0	0	0	0	0	0	0	0	0	0	0	0	0	0	0	0	0	0	0	0	0	0	0	0	0	0	0	0	0	0	0	0	0	0	0
Cronobacter_sakazakii	Conjugation-TypeIV	pGW1	hypA	0	0	0	0	0	0	0	0	0	0	0	0	0	0	0	0	0	0	0	0	0	0	0	0	0	0	0	0	0	0	0	0	0	0	0	0	0	0	0	0	0	0	0	0	0	0
Cronobacter_sakazakii	Conjugation-TypeIV	pGW1	hypothetical_protein_1053	0	0	0	0	0	0	0	0	0	0	0	0	0	0	0	0	0	0	0	0	0	0	0	0	0	0	0	0	0	0	0	0	0	0	0	0	0	0	0	0	0	0	0	0	0	0
Cronobacter_sakazakii	Conjugation-TypeIV	pGW1	hypothetical_protein_1083	0	0	0	0	0	0	0	0	0	0	0	0	0	0	0	0	0	0	0	0	0	0	0	0	0	0	0	0	0	0	0	0	0	0	0	0	0	0	0	0	0	0	0	0	0	0
Cronobacter_sakazakii	Conjugation-TypeIV	pGW1	hypothetical_protein_1110	0	0	0	0	0	0	0	0	0	0	0	0	0	0	0	0	0	0	0	0	0	0	0	0	0	0	0	0	0	0	0	0	0	0	0	0	0	0	0	0	0	0	0	0	0	0
Cronobacter_sakazakii	Conjugation-TypeIV	pGW1	hypothetical_protein_1233	0	0	0	0	0	0	0	0	0	0	0	0	0	0	0	0	0	0	0	0	0	0	0	0	0	0	0	0	0	0	0	0	0	0	0	0	0	0	0	0	0	0	0	0	0	0
Cronobacter_sakazakii	Conjugation-TypeIV	pGW1	hypothetical_protein_1512	0	0	0	0	0	0	0	0	0	0	0	0	0	0	0	0	0	0	0	0	0	0	0	0	0	0	0	0	0	0	0	0	0	0	0	0	0	0	0	0	0	0	0	0	0	0
Cronobacter_sakazakii	Conjugation-TypeIV	pGW1	hypothetical_protein_180	0	0	0	0	0	0	0	0	0	0	0	0	0	0	0	0	0	0	0	0	0	0	0	0	0	0	0	0	0	0	0	0	0	0	0	0	0	0	0	0	0	0	0	0	0	0
Cronobacter_sakazakii	Conjugation-TypeIV	pGW1	hypothetical_protein_183	0	0	0	0	0	0	0	0	0	0	0	0	0	0	0	0	0	0	0	0	0	0	0	0	0	0	0	0	0	0	0	0	0	0	0	0	0	0	0	0	0	0	0	0	0	0
Cronobacter_sakazakii	Conjugation-TypeIV	pGW1	hypothetical_protein_1905	0	0	0	0	0	0	0	0	0	0	0	0	0	0	0	0	0	0	0	0	0	0	0	0	0	0	0	0	0	0	0	0	0	0	0	0	0	0	0	0	0	0	0	0	0	0
Cronobacter_sakazakii	Conjugation-TypeIV	pGW1	hypothetical_protein_192	0	0	0	0	0	0	0	0	0	0	0	0	0	0	0	0	0	0	0	0	0	0	0	0	0	0	0	0	0	0	0	0	0	0	0	0	0	0	0	0	0	0	0	0	0	0
Cronobacter_sakazakii	Conjugation-TypeIV	pGW1	hypothetical_protein_194	0	0	0	0	0	0	0	0	0	0	0	0	0	0	0	0	0	0	0	0	0	0	0	0	0	0	0	0	0	0	0	0	0	0	0	0	0	0	0	0	0	0	0	0	0	0
Cronobacter_sakazakii	Conjugation-TypeIV	pGW1	hypothetical_protein_195	0	0	0	0	0	0	0	0	0	0	0	0	0	0	0	0	0	0	0	0	0	0	0	0	0	0	0	0	0	0	0	0	0	0	0	0	0	0	0	0	0	0	0	0	0	0
Cronobacter_sakazakii	Conjugation-TypeIV	pGW1	hypothetical_protein_198	0	0	0	0	0	0	0	0	0	0	0	0	0	0	0	0	0	0	0	0	0	0	0	0	0	0	0	0	0	0	0	0	0	0	0	0	0	0	0	0	0	0	0	0	0	0
Cronobacter_sakazakii	Conjugation-TypeIV	pGW1	hypothetical_protein_201	0	0	0	0	0	0	0	0	0	0	0	0	0	0	0	0	0	0	0	0	0	0	0	0	0	0	0	0	0	0	0	0	0	0	0	0	0	0	0	0	0	0	0	0	0	0
Cronobacter_sakazakii	Conjugation-TypeIV	pGW1	hypothetical_protein_204	0	0	0	0	0	0	0	0	0	0	0	0	0	0	0	0	0	0	0	0	0	0	0	0	0	0	0	0	0	0	0	0	0	0	0	0	0	0	0	0	0	0	0	0	0	0
Cronobacter_sakazakii	Conjugation-TypeIV	pGW1	hypothetical_protein_207	0	0	0	0	0	0	0	0	0	0	0	0	0	0	0	0	0	0	0	0	0	0	0	0	0	0	0	0	0	0	0	0	0	0	0	0	0	0	0	0	0	0	0	0	0	0
Cronobacter_sakazakii	Conjugation-TypeIV	pGW1	hypothetical_protein_213	0	0	0	0	0	0	0	0	0	0	0	0	0	0	0	0	0	0	0	0	0	0	0	0	0	0	0	0	0	0	0	0	0	0	0	0	0	0	0	0	0	0	0	0	0	0
Cronobacter_sakazakii	Conjugation-TypeIV	pGW1	hypothetical_protein_222	0	0	0	0	0	0	0	0	0	0	0	0	0	0	0	0	0	0	0	0	0	0	0	0	0	0	0	0	0	0	0	0	0	0	0	0	0	0	0	0	0	0	0	0	0	0
Cronobacter_sakazakii	Conjugation-TypeIV	pGW1	hypothetical_protein_225	0	0	0	0	0	0	0	0	0	0	0	0	0	0	0	0	0	0	0	0	0	0	0	0	0	0	0	0	0	0	0	0	0	0	0	0	0	0	0	0	0	0	0	0	0	0
Cronobacter_sakazakii	Conjugation-TypeIV	pGW1	hypothetical_protein_231	0	0	0	0	0	0	0	0	0	0	0	0	0	0	0	0	0	0	0	0	0	0	0	0	0	0	0	0	0	0	0	0	0	0	0	0	0	0	0	0	0	0	0	0	0	0
Cronobacter_sakazakii	Conjugation-TypeIV	pGW1	hypothetical_protein_234	0	0	0	0	0	0	0	0	0	0	0	0	0	0	0	0	0	0	0	0	0	0	0	0	0	0	0	0	0	0	0	0	0	0	0	0	0	0	0	0	0	0	0	0	0	0
Cronobacter_sakazakii	Conjugation-TypeIV	pGW1	hypothetical_protein_240	0	0	0	0	0	0	0	0	0	0	0	0	0	0	0	0	0	0	0	0	0	0	0	0	0	0	0	0	0	0	0	0	0	0	0	0	0	0	0	0	0	0	0	0	0	0
Cronobacter_sakazakii	Conjugation-TypeIV	pGW1	hypothetical_protein_249	0	0	0	0	0	0	0	0	0	0	0	0	0	0	0	0	0	0	0	0	0	0	0	0	0	0	0	0	0	0	0	0	0	0	0	0	0	0	0	0	0	0	0	0	0	0
Cronobacter_sakazakii	Conjugation-TypeIV	pGW1	hypothetical_protein_255	0	0	0	0	0	0	0	0	0	0	0	0	0	0	0	0	0	0	0	0	0	0	0	0	0	0	0	0	0	0	0	0	0	0	0	0	0	0	0	0	0	0	0	0	0	0
Cronobacter_sakazakii	Conjugation-TypeIV	pGW1	hypothetical_protein_258	0	0	0	0	0	0	0	0	0	0	0	0	0	0	0	0	0	0	0	0	0	0	0	0	0	0	0	0	0	0	0	0	0	0	0	0	0	0	0	0	0	0	0	0	0	0
Cronobacter_sakazakii	Conjugation-TypeIV	pGW1	hypothetical_protein_261	0	0	0	0	0	0	0	0	0	0	0	0	0	0	0	0	0	0	0	0	0	0	0	0	0	0	0	0	0	0	0	0	0	0	0	0	0	0	0	0	0	0	0	0	0	0
Cronobacter_sakazakii	Conjugation-TypeIV	pGW1	hypothetical_protein_276	0	0	0	0	0	0	0	0	0	0	0	0	0	0	0	0	0	0	0	0	0	0	0	0	0	0	0	0	0	0	0	0	0	0	0	0	0	0	0	0	0	0	0	0	0	0
Cronobacter_sakazakii	Conjugation-TypeIV	pGW1	hypothetical_protein_282	0	0	0	0	0	0	0	0	0	0	0	0	0	0	0	0	0	0	0	0	0	0	0	0	0	0	0	0	0	0	0	0	0	0	0	0	0	0	0	0	0	0	0	0	0	0
Cronobacter_sakazakii	Conjugation-TypeIV	pGW1	hypothetical_protein_285	0	0	0	0	0	0	0	0	0	0	0	0	0	0	0	0	0	0	0	0	0	0	0	0	0	0	0	0	0	0	0	0	0	0	0	0	0	0	0	0	0	0	0	0	0	0
Cronobacter_sakazakii	Conjugation-TypeIV	pGW1	hypothetical_protein_288	0	0	0	0	0	0	0	0	0	0	0	0	0	0	0	0	0	0	0	0	0	0	0	0	0	0	0	0	0	0	0	0	0	0	0	0	0	0	0	0	0	0	0	0	0	0
Cronobacter_sakazakii	Conjugation-TypeIV	pGW1	hypothetical_protein_294	0	0	0	0	0	0	0	0	0	0	0	0	0	0	0	0	0	0	0	0	0	0	0	0	0	0	0	0	0	0	0	0	0	0	0	0	0	0	0	0	0	0	0	0	0	0
Cronobacter_sakazakii	Conjugation-TypeIV	pGW1	hypothetical_protein_297	0	0	0	0	0	0	0	0	0	0	0	0	0	0	0	0	0	0	0	0	0	0	0	0	0	0	0	0	0	0	0	0	0	0	0	0	0	0	0	0	0	0	0	0	0	0
Cronobacter_sakazakii	Conjugation-TypeIV	pGW1	hypothetical_protein_300	0	0	0	0	0	0	0	0	0	0	0	0	0	0	0	0	0	0	0	0	0	0	0	0	0	0	0	0	0	0	0	0	0	0	0	0	0	0	0	0	0	0	0	0	0	0
Cronobacter_sakazakii	Conjugation-TypeIV	pGW1	hypothetical_protein_306	0	0	0	0	0	0	0	0	0	0	0	0	0	0	0	0	0	0	0	0	0	0	0	0	0	0	0	0	0	0	0	0	0	0	0	0	0	0	0	0	0	0	0	0	0	0
Cronobacter_sakazakii	Conjugation-TypeIV	pGW1	hypothetical_protein_312	0	0	0	0	0	0	0	0	0	0	0	0	0	0	0	0	0	0	0	0	0	0	0	0	0	0	0	0	0	0	0	0	0	0	0	0	0	0	0	0	0	0	0	0	0	0
Cronobacter_sakazakii	Conjugation-TypeIV	pGW1	hypothetical_protein_315	0	0	0	0	0	0	0	0	0	0	0	0	0	0	0	0	0	0	0	0	0	0	0	0	0	0	0	0	0	0	0	0	0	0	0	0	0	0	0	0	0	0	0	0	0	0
Cronobacter_sakazakii	Conjugation-TypeIV	pGW1	hypothetical_protein_318	0	0	0	0	0	0	0	0	0	0	0	0	0	0	0	0	0	0	0	0	0	0	0	0	0	0	0	0	0	0	0	0	0	0	0	0	0	0	0	0	0	0	0	0	0	0
Cronobacter_sakazakii	Conjugation-TypeIV	pGW1	hypothetical_protein_321	0	0	0	0	0	0	0	0	0	0	0	0	0	0	0	0	0	0	0	0	0	0	0	0	0	0	0	0	0	0	0	0	0	0	0	0	0	0	0	0	0	0	0	0	0	0
Cronobacter_sakazakii	Conjugation-TypeIV	pGW1	hypothetical_protein_327	0	0	0	0	0	0	0	0	0	0	0	0	0	0	0	0	0	0	0	0	0	0	0	0	0	0	0	0	0	0	0	0	0	0	0	0	0	0	0	0	0	0	0	0	0	0
Cronobacter_sakazakii	Conjugation-TypeIV	pGW1	hypothetical_protein_330	0	0	0	0	0	0	0	0	0	0	0	0	0	0	0	0	0	0	0	0	0	0	0	0	0	0	0	0	0	0	0	0	0	0	0	0	0	0	0	0	0	0	0	0	100	0
Cronobacter_sakazakii	Conjugation-TypeIV	pGW1	hypothetical_protein_342	0	0	0	0	0	0	0	0	0	0	0	0	0	0	0	0	0	0	0	0	0	0	0	0	0	0	0	0	0	0	0	0	0	0	0	0	0	0	0	0	0	0	0	0	0	0
Cronobacter_sakazakii	Conjugation-TypeIV	pGW1	hypothetical_protein_345	0	0	0	0	0	0	0	0	0	0	0	0	0	0	0	0	0	0	0	0	0	0	0	0	0	0	0	0	0	0	0	0	0	0	0	0	0	0	0	0	0	0	0	0	0	0
Cronobacter_sakazakii	Conjugation-TypeIV	pGW1	hypothetical_protein_351	0	0	0	0	0	0	0	0	0	0	0	0	0	0	0	0	0	0	0	0	0	0	0	0	0	0	0	0	0	0	0	0	0	0	0	0	0	0	0	0	0	0	0	0	0	0
Cronobacter_sakazakii	Conjugation-TypeIV	pGW1	hypothetical_protein_354	0	0	0	0	0	0	0	0	0	0	0	0	0	0	0	0	0	0	0	0	0	0	0	0	0	0	0	0	0	0	0	0	0	0	0	0	0	0	0	0	0	0	0	0	0	0
Cronobacter_sakazakii	Conjugation-TypeIV	pGW1	hypothetical_protein_357	0	0	0	0	0	0	0	0	0	0	0	0	0	0	0	0	0	0	0	0	0	0	0	0	0	0	0	0	0	0	0	0	0	0	0	0	0	0	0	0	0	0	0	0	0	0
Cronobacter_sakazakii	Conjugation-TypeIV	pGW1	hypothetical_protein_369	0	0	0	0	0	0	0	0	0	0	0	0	0	0	0	0	0	0	0	0	0	0	0	0	0	0	0	0	0	0	0	0	0	0	0	0	0	0	0	0	0	0	0	0	0	0
Cronobacter_sakazakii	Conjugation-TypeIV	pGW1	hypothetical_protein_372	0	0	0	0	0	0	0	0	0	0	0	0	0	0	0	0	0	0	0	0	0	0	0	0	0	0	0	0	0	0	0	0	0	0	0	0	0	0	0	0	0	0	0	0	0	0
Cronobacter_sakazakii	Conjugation-TypeIV	pGW1	hypothetical_protein_378	0	0	0	0	0	0	0	0	0	0	0	0	0	0	0	0	0	0	0	0	0	0	0	0	0	0	0	0	0	0	0	0	0	0	0	0	0	0	0	0	0	0	0	0	0	0
Cronobacter_sakazakii	Conjugation-TypeIV	pGW1	hypothetical_protein_381	0	0	0	0	0	0	0	0	0	0	0	0	0	0	0	0	0	0	0	0	0	0	0	0	0	0	0	0	0	0	0	0	0	0	0	0	0	0	0	0	0	0	0	0	0	0
Cronobacter_sakazakii	Conjugation-TypeIV	pGW1	hypothetical_protein_393	0	0	0	0	0	0	0	0	0	0	0	0	0	0	0	0	0	0	0	0	0	0	0	0	0	0	0	0	0	0	0	0	0	0	0	0	0	0	0	0	0	0	0	0	0	0
Cronobacter_sakazakii	Conjugation-TypeIV	pGW1	hypothetical_protein_408	0	0	0	0	0	0	0	0	0	0	0	0	0	0	0	0	0	0	0	0	0	0	0	0	0	0	0	0	0	0	0	0	0	0	0	0	0	0	0	0	0	0	0	0	0	0
Cronobacter_sakazakii	Conjugation-TypeIV	pGW1	hypothetical_protein_429	0	0	0	0	0	0	0	0	0	0	0	0	0	0	0	0	0	0	0	0	0	0	0	0	0	0	0	0	0	0	0	0	0	0	0	0	0	0	0	0	0	0	0	0	0	0
Cronobacter_sakazakii	Conjugation-TypeIV	pGW1	hypothetical_protein_4305	0	0	0	0	0	0	0	0	0	0	0	0	0	0	0	0	0	0	0	0	0	0	0	0	0	0	0	0	0	0	0	0	0	0	0	0	0	0	0	0	0	0	0	0	0	0
Cronobacter_sakazakii	Conjugation-TypeIV	pGW1	hypothetical_protein_438	0	0	0	0	0	0	0	0	0	0	0	0	0	0	0	0	0	0	0	0	0	0	0	0	0	0	0	0	0	0	0	0	0	0	0	0	0	0	0	0	0	0	0	0	0	0
Cronobacter_sakazakii	Conjugation-TypeIV	pGW1	hypothetical_protein_447	0	0	0	0	0	0	0	0	0	0	0	0	0	0	0	0	0	0	0	0	0	0	0	0	0	0	0	0	0	0	0	0	0	0	0	0	0	0	0	0	0	0	0	0	0	0
Cronobacter_sakazakii	Conjugation-TypeIV	pGW1	hypothetical_protein_456	0	0	0	0	0	0	0	0	0	0	0	0	0	0	0	0	0	0	0	0	0	0	0	0	0	0	0	0	0	0	0	0	0	0	0	0	0	0	0	0	0	0	0	0	0	0
Cronobacter_sakazakii	Conjugation-TypeIV	pGW1	hypothetical_protein_462	0	0	0	0	0	0	0	0	0	0	0	0	0	0	0	0	0	0	0	0	0	0	0	0	0	0	0	0	0	0	0	0	0	0	0	0	0	0	0	0	0	0	0	0	0	0
Cronobacter_sakazakii	Conjugation-TypeIV	pGW1	hypothetical_protein_492	0	0	0	0	0	0	0	0	0	0	0	0	0	0	0	0	0	0	0	0	0	0	0	0	0	0	0	0	0	0	0	0	0	0	0	0	0	0	0	0	0	0	0	0	0	0
Cronobacter_sakazakii	Conjugation-TypeIV	pGW1	hypothetical_protein_496	0	0	0	0	0	0	0	0	0	0	0	0	0	0	0	0	0	0	0	0	0	0	0	0	0	0	0	0	0	0	0	0	0	0	0	0	0	0	0	0	0	0	0	0	0	0
Cronobacter_sakazakii	Conjugation-TypeIV	pGW1	hypothetical_protein_501	0	0	0	0	0	0	0	0	0	0	0	0	0	0	0	0	0	0	0	0	0	0	0	0	0	0	0	0	0	0	0	0	0	0	0	0	0	0	0	0	0	0	0	0	0	0
Cronobacter_sakazakii	Conjugation-TypeIV	pGW1	hypothetical_protein_504	0	0	0	0	0	0	0	0	0	0	0	0	0	0	0	0	0	0	0	0	0	0	0	0	0	0	0	0	0	0	0	0	0	0	0	0	0	0	0	0	0	0	0	0	0	0
Cronobacter_sakazakii	Conjugation-TypeIV	pGW1	hypothetical_protein_507	0	0	0	0	0	0	0	0	0	0	0	0	0	0	0	0	0	0	0	0	0	0	0	0	0	0	0	0	0	0	0	0	0	0	0	0	0	0	0	0	0	0	0	0	0	0
Cronobacter_sakazakii	Conjugation-TypeIV	pGW1	hypothetical_protein_513	0	0	0	0	0	0	0	0	0	0	0	0	0	0	0	0	0	0	0	0	0	0	0	0	0	0	0	0	0	0	0	0	0	0	0	0	0	0	0	0	0	0	0	0	0	0
Cronobacter_sakazakii	Conjugation-TypeIV	pGW1	hypothetical_protein_522	0	0	0	0	0	0	0	0	0	0	0	0	0	0	0	0	0	0	0	0	0	0	0	0	0	0	0	0	0	0	0	0	0	0	0	0	0	0	0	0	0	0	0	0	0	0
Cronobacter_sakazakii	Conjugation-TypeIV	pGW1	hypothetical_protein_537	0	0	0	0	0	0	0	0	0	0	0	0	0	0	0	0	0	0	0	0	0	0	0	0	0	0	0	0	0	0	0	0	0	0	0	0	0	0	0	0	0	0	0	0	0	0
Cronobacter_sakazakii	Conjugation-TypeIV	pGW1	hypothetical_protein_558	0	0	0	0	0	0	0	0	0	0	0	0	0	0	0	0	0	0	0	0	0	0	0	0	0	0	0	0	0	0	0	0	0	0	0	0	0	0	0	0	0	0	0	0	0	0
Cronobacter_sakazakii	Conjugation-TypeIV	pGW1	hypothetical_protein_591	0	0	0	0	0	0	0	0	0	0	0	0	0	0	0	0	0	0	0	0	0	0	0	0	0	0	0	0	0	0	0	0	0	0	0	0	0	0	0	0	0	0	0	0	0	0
Cronobacter_sakazakii	Conjugation-TypeIV	pGW1	hypothetical_protein_603	0	0	0	0	0	0	0	0	0	0	0	0	0	0	0	0	0	0	0	0	0	0	0	0	0	0	0	0	0	0	0	0	0	0	0	0	0	0	0	0	0	0	0	0	0	0
Cronobacter_sakazakii	Conjugation-TypeIV	pGW1	hypothetical_protein_606	0	0	0	0	0	0	0	0	0	0	0	0	0	0	0	0	0	0	0	0	0	0	0	0	0	0	0	0	0	0	0	0	0	0	0	0	0	0	0	0	0	0	0	0	0	0
Cronobacter_sakazakii	Conjugation-TypeIV	pGW1	hypothetical_protein_609	0	0	0	0	0	0	0	0	0	0	0	0	0	0	0	0	0	0	0	0	0	0	0	0	0	0	0	0	0	0	0	0	0	0	0	0	0	0	0	0	0	0	0	0	0	0
Cronobacter_sakazakii	Conjugation-TypeIV	pGW1	hypothetical_protein_612	0	0	0	0	0	0	0	0	0	0	0	0	0	0	0	0	0	0	0	0	0	0	0	0	0	0	0	0	0	0	0	0	0	0	0	0	0	0	0	0	0	0	0	0	0	0
Cronobacter_sakazakii	Conjugation-TypeIV	pGW1	hypothetical_protein_624	0	0	0	0	0	0	0	0	0	0	0	0	0	0	0	0	0	0	0	0	0	0	0	0	0	0	0	0	0	0	0	0	0	0	0	0	0	0	0	0	0	0	0	0	0	0
Cronobacter_sakazakii	Conjugation-TypeIV	pGW1	hypothetical_protein_627	0	0	0	0	0	0	0	0	0	0	0	0	0	0	0	0	0	0	0	0	0	0	0	0	0	0	0	0	0	0	0	0	0	0	0	0	0	0	0	0	0	0	0	0	0	0
Cronobacter_sakazakii	Conjugation-TypeIV	pGW1	hypothetical_protein_633	0	0	0	0	0	0	0	0	0	0	0	0	0	0	0	0	0	0	0	0	0	0	0	0	0	0	0	0	0	0	0	0	0	0	0	0	0	0	0	0	0	0	0	0	0	0
Cronobacter_sakazakii	Conjugation-TypeIV	pGW1	hypothetical_protein_657	0	0	0	0	0	0	0	0	0	0	0	0	0	0	0	0	0	0	0	0	0	0	0	0	0	0	0	0	0	0	0	0	0	0	0	0	0	0	0	0	0	0	0	0	0	0
Cronobacter_sakazakii	Conjugation-TypeIV	pGW1	hypothetical_protein_702	0	0	0	0	0	0	0	0	0	0	0	0	0	0	0	0	0	0	0	0	0	0	0	0	0	0	0	0	0	0	0	0	0	0	0	0	0	0	0	0	0	0	0	0	0	0
Cronobacter_sakazakii	Conjugation-TypeIV	pGW1	hypothetical_protein_717	0	0	0	0	0	0	0	0	0	0	0	0	0	0	0	0	0	0	0	0	0	0	0	0	0	0	0	0	0	0	0	0	0	0	0	0	0	0	0	0	0	0	0	0	0	0
Cronobacter_sakazakii	Conjugation-TypeIV	pGW1	hypothetical_protein_738	0	0	0	0	0	0	0	0	0	0	0	0	0	0	0	0	0	0	0	0	0	0	0	0	0	0	0	0	0	0	0	0	0	0	0	0	0	0	0	0	0	0	0	0	0	0
Cronobacter_sakazakii	Conjugation-TypeIV	pGW1	hypothetical_protein_774	0	0	0	0	0	0	0	0	0	0	0	0	0	0	0	0	0	0	0	0	0	0	0	0	0	0	0	0	0	0	0	0	0	0	0	0	0	0	0	0	0	0	0	0	0	0
Cronobacter_sakazakii	Conjugation-TypeIV	pGW1	hypothetical_protein_792	0	0	0	0	0	0	0	0	0	0	0	0	0	0	0	0	0	0	0	0	0	0	0	0	0	0	0	0	0	0	0	0	0	0	0	0	0	0	0	0	0	0	0	0	0	0
Cronobacter_sakazakii	Conjugation-TypeIV	pGW1	hypothetical_protein_837	0	0	0	0	0	0	0	0	0	0	0	0	0	0	0	0	0	0	0	0	0	0	0	0	0	0	0	0	0	0	0	0	0	0	0	0	0	0	0	0	0	0	0	0	0	0
Cronobacter_sakazakii	Conjugation-TypeIV	pGW1	hypothetical_protein_855	0	0	0	0	0	0	0	0	0	0	0	0	0	0	0	0	0	0	0	0	0	0	0	0	0	0	0	0	0	0	0	0	0	0	0	0	0	0	0	0	0	0	0	0	0	0
Cronobacter_sakazakii	Conjugation-TypeIV	pGW1	hypothetical_protein_873	0	0	0	0	0	0	0	0	0	0	0	0	0	0	0	0	0	0	0	0	0	0	0	0	0	0	0	0	0	0	0	0	0	0	0	0	0	0	0	0	0	0	0	0	0	0
Cronobacter_sakazakii	Conjugation-TypeIV	pGW1	hypothetical_protein_879	0	0	0	0	0	0	0	0	0	0	0	0	0	0	0	0	0	0	0	0	0	0	0	0	0	0	0	0	0	0	0	0	0	0	0	0	0	0	0	0	0	0	0	0	0	0
Cronobacter_sakazakii	Conjugation-TypeIV	pGW1	hypothetical_protein_894	0	0	0	0	0	0	0	0	0	0	0	0	0	0	0	0	0	0	0	0	0	0	0	0	0	0	0	0	0	0	0	0	0	0	0	0	0	0	0	0	0	0	0	0	0	0
Cronobacter_sakazakii	Conjugation-TypeIV	pGW1	hypothetical_protein_897	0	0	0	0	0	0	0	0	0	0	0	0	0	0	0	0	0	0	0	0	0	0	0	0	0	0	0	0	0	0	0	0	0	0	0	0	0	0	0	0	0	0	0	0	0	0
Cronobacter_sakazakii	Conjugation-TypeIV	pGW1	hypothetical_protein_906	0	0	0	0	0	0	0	0	0	0	0	0	0	0	0	0	0	0	0	0	0	0	0	0	0	0	0	0	0	0	0	0	0	0	0	0	0	0	0	0	0	0	0	0	0	0
Cronobacter_sakazakii	Conjugation-TypeIV	pGW1	hypothetical_protein_921	0	0	0	0	0	0	0	0	0	0	0	0	0	0	0	0	0	0	0	0	0	0	0	0	0	0	0	0	0	0	0	0	0	0	0	0	0	0	0	0	0	0	0	0	0	0
Cronobacter_sakazakii	Conjugation-TypeIV	pGW1	hypothetical_protein_936	0	0	0	0	0	0	0	0	0	0	0	0	0	0	0	0	0	0	0	0	0	0	0	0	0	0	0	0	0	0	0	0	0	0	0	0	0	0	0	0	0	0	0	0	0	0
Cronobacter_sakazakii	Conjugation-TypeIV	pGW1	hypothetical_protein_939	0	0	0	0	0	0	0	0	0	0	0	0	0	0	0	0	0	0	0	0	0	0	0	0	0	0	0	0	0	0	0	0	0	0	0	0	0	0	0	0	0	0	0	0	0	0
Cronobacter_sakazakii	Conjugation-TypeIV	pGW1	hypothetical_protein_948	0	0	0	0	0	0	0	0	0	0	0	0	0	0	0	0	0	0	0	0	0	0	0	0	0	0	0	0	0	0	0	0	0	0	0	0	0	0	0	0	0	0	0	0	0	0
Cronobacter_sakazakii	Conjugation-TypeIV	pGW1	hypothetical_protein_948_protein_2	0	0	0	0	0	0	0	0	0	0	0	0	0	0	0	0	0	0	0	0	0	0	0	0	0	0	0	0	0	0	0	0	0	0	0	0	0	0	0	0	0	0	0	0	0	0
Cronobacter_sakazakii	Conjugation-TypeIV	pGW1	hypothetical_protein_978	0	0	0	0	0	0	0	0	0	0	0	0	0	0	0	0	0	0	0	0	0	0	0	0	0	0	0	0	0	0	0	0	0	0	0	0	0	0	0	0	0	0	0	0	0	0
Cronobacter_sakazakii	Conjugation-TypeIV	pGW1	hypothetical_protein_987	0	0	0	0	0	0	0	0	0	0	0	0	0	0	0	0	0	0	0	0	0	0	0	0	0	0	0	0	0	0	0	0	0	0	0	0	0	0	0	0	0	0	0	0	0	0
Cronobacter_sakazakii	Conjugation-TypeIV	pGW1	hypothetical_protein_pSL131_IncA/C-IncX3_00120	0	0	0	0	0	0	0	0	0	0	0	0	0	0	0	0	0	0	0	0	0	0	0	0	0	0	0	0	0	0	0	0	0	0	0	0	0	0	0	0	0	0	0	0	0	0
Cronobacter_sakazakii	Conjugation-TypeIV	pGW1	intI1	0	0	0	0	0	0	0	0	0	0	0	0	0	0	0	0	0	0	0	0	0	0	0	0	0	0	0	0	0	0	0	0	0	0	0	0	0	0	0	0	0	0	0	0	0	0
Cronobacter_sakazakii	Conjugation-TypeIV	pGW1	iron-containing_alcohol_dehydrogenase	0	0	0	0	0	0	0	0	0	0	0	0	0	0	0	0	0	0	0	0	0	0	0	0	0	0	0	0	0	0	0	0	0	0	0	0	0	0	0	0	0	0	0	0	0	0
Cronobacter_sakazakii	Conjugation-TypeIV	pGW1	kinase	0	0	0	0	0	0	0	0	0	0	0	0	0	0	0	0	0	0	0	0	0	0	0	0	0	0	0	0	0	0	0	0	0	0	0	0	0	0	0	0	0	0	0	0	0	0
Cronobacter_sakazakii	Conjugation-TypeIV	pGW1	lepB	0	0	0	0	0	0	0	0	0	0	0	0	0	0	0	0	0	0	0	0	0	0	0	0	0	0	0	0	0	0	0	0	0	0	0	0	0	0	0	0	0	0	0	0	0	0
Cronobacter_sakazakii	Conjugation-TypeIV	pGW1	lipoprotein	0	0	0	0	0	0	0	0	0	0	0	0	0	0	0	0	0	0	0	0	0	0	0	0	0	0	0	0	0	0	0	0	0	0	0	0	0	0	0	0	0	0	0	0	0	0
Cronobacter_sakazakii	Conjugation-TypeIV	pGW1	lytic_transglycosylase_domain-containing_protein	0	0	0	0	0	0	0	0	0	0	0	0	0	0	0	0	0	0	0	0	0	0	0	0	0	0	0	0	0	0	0	0	0	0	0	0	0	0	0	0	0	0	0	0	0	0
Cronobacter_sakazakii	Conjugation-TypeIV	pGW1	merA	0	0	0	0	0	0	0	0	0	0	0	0	0	0	0	0	0	0	0	0	0	0	0	0	0	0	0	0	0	0	0	0	0	0	0	0	0	0	0	0	0	0	0	0	0	0
Cronobacter_sakazakii	Conjugation-TypeIV	pGW1	merB	0	0	0	0	0	0	0	0	0	0	0	0	0	0	0	0	0	0	0	0	0	0	0	0	0	0	0	0	0	0	0	0	0	0	0	0	0	0	0	0	0	0	0	0	0	0
Cronobacter_sakazakii	Conjugation-TypeIV	pGW1	merC	0	0	0	0	0	0	0	0	0	0	0	0	0	0	0	0	0	0	0	0	0	0	0	0	0	0	0	0	0	0	0	0	0	0	0	0	0	0	0	0	0	0	0	0	0	0
Cronobacter_sakazakii	Conjugation-TypeIV	pGW1	merD	0	0	0	0	0	0	0	0	0	0	0	0	0	0	0	0	0	0	0	0	0	0	0	0	0	0	0	0	0	0	0	0	0	0	0	0	0	0	0	0	0	0	0	0	0	0
Cronobacter_sakazakii	Conjugation-TypeIV	pGW1	merG	0	0	0	0	0	0	0	0	0	0	0	0	0	0	0	0	0	0	0	0	0	0	0	0	0	0	0	0	0	0	0	0	0	0	0	0	0	0	0	0	0	0	0	0	0	0
Cronobacter_sakazakii	Conjugation-TypeIV	pGW1	merR	0	0	0	0	0	0	0	0	0	0	0	0	0	0	0	0	0	0	0	0	0	0	0	0	0	0	0	0	0	0	0	0	0	0	0	0	0	0	0	0	0	0	0	0	0	0
Cronobacter_sakazakii	Conjugation-TypeIV	pGW1	mercury(II)_reductase	0	0	0	0	0	0	0	0	0	0	0	0	0	0	0	0	0	0	0	0	0	0	0	0	0	0	0	0	0	0	0	0	0	0	0	0	0	0	0	0	0	0	0	0	0	0
Cronobacter_sakazakii	Conjugation-TypeIV	pGW1	mercury_resistance_transcriptional_regulator_MerR	0	0	0	0	0	0	0	0	0	0	0	0	0	0	0	0	0	0	0	0	0	0	0	0	0	0	0	0	0	0	0	0	0	0	0	0	0	0	0	0	0	0	0	0	0	0
Cronobacter_sakazakii	Conjugation-TypeIV	pGW1	metal-dependent_hydrolase	0	0	0	0	0	0	0	0	0	0	0	0	0	0	0	0	0	0	0	0	0	0	0	0	0	0	0	0	0	0	0	0	0	0	0	0	0	0	0	0	0	0	0	0	0	0
Cronobacter_sakazakii	Conjugation-TypeIV	pGW1	mph(A)	0	0	0	0	0	0	0	0	0	0	0	0	0	0	0	0	0	0	0	0	0	0	0	0	0	0	0	0	0	0	0	0	0	0	0	0	0	0	0	0	0	0	0	0	0	0
Cronobacter_sakazakii	Conjugation-TypeIV	pGW1	nickel/cobalt_efflux_protein_RcnA	0	0	0	0	0	0	0	0	0	0	0	0	0	0	0	0	0	0	0	0	0	0	0	0	0	0	0	0	0	0	0	0	0	0	0	0	0	0	0	0	0	0	0	0	0	0
Cronobacter_sakazakii	Conjugation-TypeIV	pGW1	nuclear_transport_factor_2_family_protein	0	0	0	0	0	0	0	0	0	0	0	0	0	0	0	0	0	0	0	0	0	0	0	0	0	0	0	0	0	0	0	0	0	0	0	0	0	0	0	0	0	0	0	0	0	0
Cronobacter_sakazakii	Conjugation-TypeIV	pGW1	nucleotidyltransferase	0	0	0	0	0	0	0	0	0	0	0	0	0	0	0	0	0	0	0	0	0	0	0	0	0	0	0	0	0	0	0	0	0	0	0	0	0	0	0	0	0	0	0	0	0	0
Cronobacter_sakazakii	Conjugation-TypeIV	pGW1	pcoS	0	0	0	0	0	84.79	0	0	0	0	0	0	0	0	0	0	0	0	0	0	0	0	0	0	0	0	0	0	0	0	0	0	0	0	0	0	0	0	0	0	84.79	84.79	0	0	0	0
Cronobacter_sakazakii	Conjugation-TypeIV	pGW1	peptide_ABC_transporter_permease	0	0	0	0	0	0	0	0	0	0	0	0	0	0	0	0	0	0	0	0	0	0	0	0	0	0	0	0	0	0	0	0	0	0	0	0	0	0	0	0	0	0	0	0	0	0
Cronobacter_sakazakii	Conjugation-TypeIV	pGW1	phage-related_DNA-binding_protein	0	0	0	0	0	0	0	0	0	0	0	0	0	0	0	0	0	0	0	0	0	0	0	0	0	0	0	0	0	0	0	0	0	0	0	0	0	0	0	0	0	0	0	0	0	0
Cronobacter_sakazakii	Conjugation-TypeIV	pGW1	phosphoadenosine_phosphosulfate_reductase	0	0	0	0	0	0	0	0	0	0	0	0	0	0	0	0	0	0	0	0	0	0	0	0	0	0	0	0	0	0	0	0	0	0	0	0	0	0	0	0	0	0	0	0	0	0
Cronobacter_sakazakii	Conjugation-TypeIV	pGW1	phosphoethanolamine--lipid_A_transferase_MCR-9.1	0	0	0	0	0	0	0	0	0	0	0	0	0	0	0	0	0	0	0	0	0	0	0	0	0	0	0	0	0	0	0	0	0	0	0	0	0	0	0	0	0	0	0	0	0	0
Cronobacter_sakazakii	Conjugation-TypeIV	pGW1	pili_assembly_chaperone	0	0	0	0	0	0	0	0	0	0	0	0	0	0	0	0	0	0	0	0	0	0	0	0	0	0	0	0	0	0	0	0	0	0	0	0	0	0	0	0	0	0	0	0	0	0
Cronobacter_sakazakii	Conjugation-TypeIV	pGW1	pilus_assembly_protein	0	0	0	0	0	0	0	0	0	0	0	0	0	0	0	0	0	0	0	0	0	0	0	0	0	0	0	0	0	0	0	0	0	0	0	0	0	0	0	0	0	0	0	0	0	0
Cronobacter_sakazakii	Conjugation-TypeIV	pGW1	plasmid_transfer_protein	0	0	0	0	0	0	0	0	0	0	0	0	0	0	0	0	0	0	0	0	0	0	0	0	0	0	0	0	0	0	0	0	0	0	0	0	0	0	0	0	0	0	0	0	0	0
Cronobacter_sakazakii	Conjugation-TypeIV	pGW1	protein_phosphatase_2C_domain-containing_protein	0	0	0	0	0	0	0	0	0	0	0	0	0	0	0	0	0	0	0	0	0	0	0	0	0	0	0	0	0	0	0	0	0	0	0	0	0	0	0	0	0	0	0	0	0	0
Cronobacter_sakazakii	Conjugation-TypeIV	pGW1	pspA	0	81.13	80.95	80.7	80.58	80.4	80.79	80.55	80.79	80.79	0	80.55	80.55	80.55	80.55	80.7	80.49	80.85	80.85	80.7	80.7	80.55	81.46	81.46	81.46	81.46	81.46	81.46	81.46	81.46	81.46	81.46	81.46	81.46	0	0	0	0	77.11	80.85	80.85	80.85	80.85	81	81	81.58
Cronobacter_sakazakii	Conjugation-TypeIV	pGW1	pspC	0	0	0	0	0	0	0	0	0	0	0	0	0	0	0	0	0	0	0	0	0	0	0	0	0	0	0	0	0	0	0	0	0	0	0	0	0	0	0	0	0	0	0	0	0	0
Cronobacter_sakazakii	Conjugation-TypeIV	pGW1	pspF	0	0	0	0	0	0	0	0	0	0	0	0	0	0	0	0	0	0	0	0	0	0	0	0	0	0	0	0	0	0	0	0	0	0	0	0	0	0	0	0	0	0	0	0	0	0
Cronobacter_sakazakii	Conjugation-TypeIV	pGW1	putative_outer_membrane_protein	0	0	0	0	0	0	0	0	0	0	0	0	0	0	0	0	0	0	0	0	0	0	0	0	0	0	0	0	0	0	0	0	0	0	0	0	0	0	0	0	0	0	0	0	0	0
Cronobacter_sakazakii	Conjugation-TypeIV	pGW1	putative_recombinase	0	0	0	0	0	0	0	0	0	0	0	0	0	0	0	0	0	0	0	0	0	0	0	0	0	0	0	0	0	0	0	0	0	0	0	0	0	0	0	0	0	0	0	0	0	0
Cronobacter_sakazakii	Conjugation-TypeIV	pGW1	putative_traX	0	0	0	0	0	0	0	0	0	0	0	0	0	0	0	0	0	0	0	0	0	0	0	0	0	0	0	0	0	0	0	0	0	0	0	0	0	0	0	0	0	0	0	0	0	0
Cronobacter_sakazakii	Conjugation-TypeIV	pGW1	quaternary_ammonium_compound_efflux_SMR_transporter_QacE_delta_1	0	0	0	0	0	0	0	0	0	0	0	0	0	0	0	0	0	0	0	0	0	0	0	0	0	0	0	0	0	0	0	0	0	0	0	0	0	0	0	0	0	0	0	0	0	0
Cronobacter_sakazakii	Conjugation-TypeIV	pGW1	quinolone_resistance_pentapeptide_repeat_proteinQnrB4	0	0	0	0	0	0	0	0	0	0	0	0	0	0	0	0	0	0	0	0	0	0	0	0	0	0	0	0	0	0	0	0	0	0	0	0	0	0	0	0	0	0	0	0	0	0
Cronobacter_sakazakii	Conjugation-TypeIV	pGW1	rcnR	0	0	0	0	0	0	0	0	0	0	0	0	0	0	0	0	0	0	0	0	0	0	0	0	0	0	0	0	0	0	0	0	0	0	0	0	0	0	0	0	0	0	0	0	0	0
Cronobacter_sakazakii	Conjugation-TypeIV	pGW1	recombinase_family_protein	0	0	0	0	0	0	0	0	0	0	0	0	0	0	0	0	0	0	0	0	0	0	0	0	0	0	0	0	0	0	0	0	0	0	0	0	0	0	0	0	0	0	0	0	0	0
Cronobacter_sakazakii	Conjugation-TypeIV	pGW1	relB	0	0	0	0	0	0	0	0	0	0	0	0	0	0	0	0	0	0	0	0	0	0	0	0	0	0	0	0	0	0	0	0	0	0	0	0	0	0	0	0	0	0	0	0	0	0
Cronobacter_sakazakii	Conjugation-TypeIV	pGW1	relE	0	0	0	0	0	0	0	0	0	0	0	0	0	0	0	0	0	0	0	0	0	0	0	0	0	0	0	0	0	0	0	0	0	0	0	0	0	0	0	0	0	0	0	0	0	0
Cronobacter_sakazakii	Conjugation-TypeIV	pGW1	resolvase	0	0	0	0	0	0	0	0	0	0	0	0	0	0	0	0	0	0	0	0	0	0	0	0	0	0	0	0	0	0	0	0	0	0	0	0	0	0	0	0	0	0	0	0	0	0
Cronobacter_sakazakii	Conjugation-TypeIV	pGW1	restriction_endonuclease	0	0	0	0	0	0	0	0	0	0	0	0	0	0	0	0	0	0	0	0	0	0	0	0	0	0	0	0	0	0	0	0	0	0	0	0	0	0	0	0	0	0	0	0	0	0
Cronobacter_sakazakii	Conjugation-TypeIV	pGW1	sapA	0	0	0	0	0	0	0	0	0	0	0	0	0	0	0	0	0	0	0	0	0	0	0	0	0	0	0	0	0	0	0	0	0	0	0	0	0	0	0	0	0	0	0	0	0	0
Cronobacter_sakazakii	Conjugation-TypeIV	pGW1	sapB	0	77.86	76.91	77.01	76.91	76.91	77.3	76.6	77.3	77.3	0	77.01	77.01	77.01	77.01	76.91	77.01	76.8	76.8	77.01	77.01	76.91	78.1	78.1	78.1	78.1	78.1	78.1	78.1	78.1	78.1	78.1	78.1	78.1	0	0	0	0	78.1	77.61	77.61	77.61	77.61	78	77.61	78.1
Cronobacter_sakazakii	Conjugation-TypeIV	pGW1	site-specific_DNA-methyltransferase	0	0	0	0	0	0	0	0	0	0	0	0	0	0	0	0	0	0	0	0	0	0	0	0	0	0	0	0	0	0	0	0	0	0	0	0	0	0	0	0	0	0	0	0	0	0
Cronobacter_sakazakii	Conjugation-TypeIV	pGW1	stbA_family_protein	0	0	0	0	0	0	0	0	0	0	0	0	0	0	0	0	0	0	0	0	0	0	0	0	0	0	0	0	0	0	0	0	0	0	0	0	0	0	0	0	0	0	0	0	0	0
Cronobacter_sakazakii	Conjugation-TypeIV	pGW1	sul1	0	0	0	0	0	0	0	0	0	0	0	0	0	0	0	0	0	0	0	0	0	0	0	0	0	0	0	0	0	0	0	0	0	0	0	0	0	0	0	0	0	0	0	0	0	0
Cronobacter_sakazakii	Conjugation-TypeIV	pGW1	tellurite_resistance_TerB_family_protein	0	0	0	0	0	0	0	0	0	0	0	0	0	0	0	0	0	0	0	0	0	0	0	0	0	0	0	0	0	0	0	0	0	0	0	0	0	0	0	0	0	0	0	0	0	0
Cronobacter_sakazakii	Conjugation-TypeIV	pGW1	tellurium_resistance-associated_protein_TerZ	0	0	0	0	0	0	0	0	0	0	0	0	0	0	0	0	0	0	0	0	0	0	0	0	0	0	0	0	0	0	0	0	0	0	0	0	0	0	0	0	0	0	0	0	0	0
Cronobacter_sakazakii	Conjugation-TypeIV	pGW1	tellurium_resistance_protein_TerA	0	0	0	0	0	0	0	0	0	0	0	0	0	0	0	0	0	0	0	0	0	0	0	0	0	0	0	0	0	0	0	0	0	0	0	0	0	0	0	0	0	0	0	0	0	0
Cronobacter_sakazakii	Conjugation-TypeIV	pGW1	tellurium_resistance_protein_TerF	0	0	0	0	0	0	0	0	0	0	0	0	0	0	0	0	0	0	0	0	0	0	0	0	0	0	0	0	0	0	0	0	0	0	0	0	0	0	0	0	0	0	0	0	0	0
Cronobacter_sakazakii	Conjugation-TypeIV	pGW1	terC	0	0	0	0	0	0	0	0	0	0	0	0	0	0	0	0	0	0	0	0	0	0	0	0	0	0	0	0	0	0	0	0	0	0	0	0	0	0	0	0	0	0	0	0	0	0
Cronobacter_sakazakii	Conjugation-TypeIV	pGW1	terD	0	0	0	0	0	0	0	0	0	0	0	0	0	0	0	0	0	0	0	0	0	0	0	0	0	0	0	0	0	0	0	0	0	0	0	0	0	0	0	0	0	0	0	0	0	0
Cronobacter_sakazakii	Conjugation-TypeIV	pGW1	terW	0	0	0	0	0	0	0	0	0	0	0	0	0	0	0	0	0	0	0	0	0	0	0	0	0	0	0	0	0	0	0	0	0	0	0	0	0	0	0	0	0	0	0	0	0	0
Cronobacter_sakazakii	Conjugation-TypeIV	pGW1	tet(D)	0	0	0	0	0	0	0	0	0	0	0	0	0	0	0	0	0	0	0	0	0	0	0	0	0	0	0	0	0	0	0	0	0	0	0	0	0	0	0	0	0	0	0	0	0	0
Cronobacter_sakazakii	Conjugation-TypeIV	pGW1	tetracycline_resistance_transcriptional_repressor_TetR(D)	0	0	0	0	0	0	0	0	0	0	0	0	0	0	0	0	0	0	0	0	0	0	0	0	0	0	0	0	0	0	0	0	0	0	0	0	0	0	0	0	0	0	0	0	0	0
Cronobacter_sakazakii	Conjugation-TypeIV	pGW1	thermonuclease_family_protein	0	0	0	0	0	0	0	0	0	0	0	0	0	0	0	0	0	0	0	0	0	0	0	0	0	0	0	0	0	0	0	0	0	0	0	0	0	0	0	0	0	0	0	0	0	0
Cronobacter_sakazakii	Conjugation-TypeIV	pGW1	thioredoxin_family_protein	0	0	0	0	0	0	0	0	0	0	0	0	0	0	0	0	0	0	0	0	0	0	0	0	0	0	0	0	0	0	0	0	0	0	0	0	0	0	0	0	0	0	0	0	0	0
Cronobacter_sakazakii	Conjugation-TypeIV	pGW1	thioredoxin_fold_domain-containing_protein	0	0	0	0	0	0	0	0	0	0	0	0	0	0	0	0	0	0	0	0	0	0	0	0	0	0	0	0	0	0	0	0	0	0	0	0	0	0	0	0	0	0	0	0	0	0
Cronobacter_sakazakii	Conjugation-TypeIV	pGW1	toxic_anion_resistance_protein	0	0	0	0	0	0	0	0	0	0	0	0	0	0	0	0	0	0	0	0	0	0	0	0	0	0	0	0	0	0	0	0	0	0	0	0	0	0	0	0	0	0	0	0	0	0
Cronobacter_sakazakii	Conjugation-TypeIV	pGW1	traD	0	0	0	0	0	0	0	0	0	0	0	0	0	0	0	0	0	0	0	0	0	0	0	0	0	0	0	0	0	0	0	0	0	0	0	0	0	0	0	0	0	0	0	0	0	0
Cronobacter_sakazakii	Conjugation-TypeIV	pGW1	transcriptional_regulator	0	0	0	0	0	0	0	0	0	0	0	0	0	0	0	0	0	0	0	0	0	0	0	0	0	0	0	0	0	0	0	0	0	0	0	0	0	0	0	0	0	0	0	0	0	0
Cronobacter_sakazakii	Conjugation-TypeIV	pGW1	transfer_repressor	0	0	0	0	0	0	0	0	0	0	0	0	0	0	0	0	0	0	0	0	0	0	0	0	0	0	0	0	0	0	0	0	0	0	0	0	0	0	0	0	0	0	0	0	0	0
Cronobacter_sakazakii	Conjugation-TypeIV	pGW1	transposase	0	0	0	0	0	0	0	0	0	0	0	0	0	0	0	0	0	0	0	0	0	0	0	0	0	0	0	0	0	0	0	0	0	0	0	0	0	0	0	0	0	0	0	0	99.42	99.42
Cronobacter_sakazakii	Conjugation-TypeIV	pGW1	trhR	0	0	0	0	0	0	0	0	0	0	0	0	0	0	0	0	0	0	0	0	0	0	0	0	0	0	0	0	0	0	0	0	0	0	0	0	0	0	0	0	0	0	0	0	0	0
Cronobacter_sakazakii	Conjugation-TypeIV	pGW1	trypsin-like_peptidase_domain-containing_protein	0	0	0	0	0	0	0	0	0	0	0	0	0	0	0	0	0	0	0	0	0	0	0	0	0	0	0	0	0	0	0	0	0	0	0	0	0	0	0	0	0	0	0	0	0	0
Cronobacter_sakazakii	Conjugation-TypeIV	pGW1	type_A-2_chloramphenicol_O-acetyltransferase_CatII	0	0	0	0	0	0	0	0	0	0	0	0	0	0	0	0	0	0	0	0	0	0	0	0	0	0	0	0	0	0	0	0	0	0	0	0	0	0	0	0	0	0	0	0	0	0
Cronobacter_sakazakii	Conjugation-TypeIV	pGW1	type_II_site-specific_deoxyribonuclease	0	0	0	0	0	0	0	0	0	0	0	0	0	0	0	0	0	0	0	0	0	0	0	0	0	0	0	0	0	0	0	0	0	0	0	0	0	0	0	0	0	0	0	0	0	0
Cronobacter_sakazakii	Conjugation-TypeIV	pGW1	type_I_toxin-antitoxin_system_Hok_family_toxin	0	0	0	0	0	0	0	0	0	0	0	0	0	0	0	0	0	0	0	0	0	0	0	0	0	0	0	0	0	0	0	0	0	0	0	0	0	0	0	0	0	0	0	0	0	0
Cronobacter_sakazakii	Conjugation-TypeIV	pGW1	type_VII_secretion-associated_protein	0	0	0	0	0	0	0	0	0	0	0	0	0	0	0	0	0	0	0	0	0	0	0	0	0	0	0	0	0	0	0	0	0	0	0	0	0	0	0	0	0	0	0	0	0	0
Cronobacter_sakazakii	Conjugation-TypeIV	pGW1	tyrosine-type_recombinase/integrase	0	0	0	0	0	0	0	0	0	0	0	0	0	0	0	0	0	0	0	0	0	0	0	0	0	0	0	0	0	0	0	0	0	0	0	0	0	0	0	0	0	0	0	0	0	0
Cronobacter_sakazakii	Conjugation-TypeIV	pGW1	umuC	0	0	0	0	0	0	0	0	0	0	0	0	0	0	0	0	0	0	0	0	0	0	0	0	0	0	0	0	0	0	0	0	0	0	0	0	0	0	0	0	0	0	0	0	0	0
Cronobacter_sakazakii	Conjugation-TypeIV	pGW1	umuD	0	0	0	0	0	0	0	0	0	0	0	0	0	0	0	0	0	0	0	0	0	0	0	0	0	0	0	0	0	0	0	0	0	0	0	0	0	0	0	0	0	0	0	0	0	0
Cronobacter_sakazakii	Conjugation-TypeIV	pGW1	universal_stress_protein	0	0	0	0	0	0	0	0	0	0	0	0	0	0	0	0	0	0	0	0	0	0	0	0	0	0	0	0	0	0	0	0	0	0	0	0	0	0	0	0	0	0	0	0	0	0
Cronobacter_sakazakii	Cyptic_plasmid	CSAK29544_2p	DNA_replication_protein	0	0	0	0	0	0	0	0	0	0	0	0	0	0	88.58	94.14	0	0	0	0	0	0	0	0	0	0	0	0	0	0	0	0	0	0	0	0	0	0	0	0	100	95.71	0	0	100	100
Cronobacter_sakazakii	Cyptic_plasmid	CSAK29544_2p	hypothetical_protein_270	0	0	0	0	0	0	0	0	0	0	0	0	0	0	0	0	0	0	0	0	0	0	0	0	0	0	0	0	0	0	0	0	0	0	0	0	0	0	0	0	83.24	77.83	0	0	0	100
Cronobacter_sakazakii	Cyptic_plasmid	CSAK29544_2p	methyl-accepting_chemotaxis_protein	0	0	0	0	0	0	0	0	0	0	0	0	0	0	0	0	0	0	0	0	0	0	0	0	0	0	0	0	0	0	0	0	0	0	0	0	0	0	0	0	0	0	0	0	0	99.48
Cronobacter_sakazakii	Cyptic_plasmid	CSAK29544_2p	nuclease	0	0	0	0	0	0	0	0	0	0	0	0	0	0	0	0	0	0	0	0	0	0	0	0	0	0	0	0	0	0	0	0	0	0	0	0	0	0	0	0	96.72	0	0	0	100	100
Cronobacter_sakazakii	Cyptic_plasmid	CSAK29544_2p	plasmid_mobilization_relaxosome_protein_MobC	0	0	0	0	0	0	0	0	0	0	0	0	0	0	0	0	0	0	0	0	0	0	0	0	0	0	0	0	0	0	0	0	0	0	0	0	0	0	0	0	0	0	0	0	100	100
Cronobacter_sakazakii	Cyptic_plasmid	CSAK29544_2p	plasmid_replication_initiation_protein	0	0	0	0	0	0	0	0	0	0	0	0	0	0	0	0	0	0	0	0	0	0	0	0	0	0	0	0	0	0	0	0	0	0	0	0	0	0	0	0	0	0	0	0	0	100
Cronobacter_sakazakii	Cyptic_plasmid	CSAK29544_2p	replication_initation_protein	0	0	0	0	0	0	0	0	0	0	0	0	0	0	0	0	0	0	0	0	0	0	0	0	0	0	0	0	0	0	0	0	0	0	0	0	0	0	0	0	92.47	0	0	0	0	100
Cronobacter_sakazakii	Cyptic_plasmid	pCSA2	DNA_replication_protein	0	0	0	0	0	0	0	0	0	0	0	0	0	0	89.44	91.3	0	0	0	0	0	0	0	0	0	0	0	0	0	0	0	0	0	0	0	0	0	0	0	0	100	94.08	0	87.73	100	100
Cronobacter_sakazakii	Cyptic_plasmid	pCSA2	mcp	0	0	0	0	0	0	0	0	0	0	0	0	0	0	0	0	0	0	0	0	0	0	0	0	0	0	0	0	0	0	0	0	0	0	0	0	0	0	0	0	0	0	0	0	0	99.48
Cronobacter_sakazakii	Cyptic_plasmid	pCSA2	mobA	0	0	0	0	0	0	0	0	0	0	0	0	0	0	0	90.05	0	0	0	0	0	0	0	0	0	0	0	0	0	0	0	0	0	0	0	0	0	0	0	0	97.52	0	0	0	100	100
Cronobacter_sakazakii	Cyptic_plasmid	pCSA2	mobB	0	0	0	0	0	0	0	0	0	0	0	0	0	0	0	0	0	0	0	0	0	0	0	0	0	0	0	0	0	0	0	0	0	0	0	0	0	0	0	0	0	0	0	0	0	100
Cronobacter_sakazakii	Cyptic_plasmid	pCSA2	mobC	0	0	0	0	0	0	0	0	0	0	0	0	0	0	0	0	0	0	0	0	0	0	0	0	0	0	0	0	0	0	0	0	0	0	0	0	0	0	0	0	0	0	0	0	100	94.44
Cronobacter_sakazakii	Cyptic_plasmid	pSP291-3	hypothetical_protein_183	0	0	0	0	0	0	0	0	0	0	0	0	0	0	0	0	0	0	0	0	0	0	0	0	0	0	0	0	0	0	0	0	0	0	0	0	0	0	0	0	0	0	0	0	0	0
Cronobacter_sakazakii	Cyptic_plasmid	pSP291-3	hypothetical_protein_371	0	0	0	0	0	0	0	0	0	0	0	0	0	0	0	93.75	0	0	0	0	0	0	0	0	0	0	0	0	0	0	0	0	0	0	0	0	0	0	0	0	0	0	0	0	96.48	0
Cronobacter_sakazakii	Cyptic_plasmid	pSP291-3	nuclease	0	0	0	0	0	0	0	0	0	0	0	0	0	0	0	81.84	0	0	0	0	0	0	0	0	0	0	0	0	0	0	0	0	0	0	0	0	0	0	0	0	98.24	0	0	0	100	100
Cronobacter_sakazakii	Cyptic_plasmid	pSP291-3	plasmid_mobilization_relaxosome_protein_MobC	0	0	0	0	0	0	0	0	0	0	0	0	0	0	0	85.26	0	0	0	0	0	0	0	0	0	0	0	0	0	0	0	0	0	0	0	0	0	0	0	0	0	0	0	0	93.33	0
Cronobacter_sakazakii	Cyptic_plasmid	pSP291-3	plasmid_replication_initiation_protein	0	0	0	0	0	0	0	0	0	0	0	0	0	0	0	0	0	0	0	0	0	0	0	0	0	0	0	0	0	0	0	0	0	0	0	0	0	0	0	0	0	0	0	0	100	98.29
Cronobacter_sakazakii	Cyptic_plasmid	pSP291-3	transposase_insN_for_insertion_sequence_element_IS911A	0	0	0	0	0	0	0	0	0	0	0	0	0	0	0	0	0	0	0	0	0	0	0	0	0	0	0	0	0	0	0	0	0	0	0	0	0	0	0	0	0	0	0	0	0	0
Cronobacter_sakazakii	TBD	p505108-MDR	ATP-binding_protein	0	0	0	0	0	0	0	0	0	0	0	0	0	0	0	0	0	0	0	0	0	0	0	0	0	0	0	0	0	0	0	0	0	0	0	0	0	0	0	0	0	0	0	0	0	0
Cronobacter_sakazakii	TBD	p505108-MDR	ATP-grasp	0	0	0	0	0	0	0	0	0	0	0	0	0	0	0	0	0	0	0	0	0	0	0	0	0	0	0	0	0	0	0	0	0	0	0	0	0	0	0	0	0	0	0	0	0	0
Cronobacter_sakazakii	TBD	p505108-MDR	ATP/GTP-binding_protein	0	0	0	0	0	0	0	0	0	0	0	0	0	0	0	0	0	0	0	0	0	0	0	0	0	0	0	0	0	0	0	0	0	0	0	0	0	0	0	0	0	0	0	0	0	0
Cronobacter_sakazakii	TBD	p505108-MDR	Adenine/guanine_phosphoribosyltransferases_and_related_PRPP-binding_protein	0	0	0	0	0	0	0	0	0	0	0	0	0	0	0	0	0	0	0	0	0	0	0	0	0	0	0	0	0	0	0	0	0	0	0	0	0	0	0	0	0	0	0	0	0	0
Cronobacter_sakazakii	TBD	p505108-MDR	DNA-binding_plasmid_partition_protein	0	0	0	0	0	0	0	0	0	0	0	0	0	0	0	0	0	0	0	0	0	0	0	0	0	0	0	0	0	0	0	0	0	0	0	0	0	0	0	0	0	0	0	0	0	0
Cronobacter_sakazakii	TBD	p505108-MDR	DNA-binding_protein	0	0	0	0	0	0	0	0	0	0	0	0	0	0	0	0	0	0	0	0	0	0	0	0	0	0	0	0	0	0	0	0	0	0	0	0	0	0	0	0	0	0	0	0	0	0
Cronobacter_sakazakii	TBD	p505108-MDR	DNA_methyltransferase	0	0	0	0	0	0	0	0	0	0	0	0	0	0	0	0	0	0	0	0	0	0	0	0	0	0	0	0	0	0	0	0	0	0	0	0	0	0	0	0	0	0	0	0	0	0
Cronobacter_sakazakii	TBD	p505108-MDR	DNA_restriction_methylase	0	0	0	0	0	0	0	0	0	0	0	0	0	0	0	0	0	0	0	0	0	0	0	0	0	0	0	0	0	0	0	0	0	0	0	0	0	0	0	0	0	0	0	0	0	0
Cronobacter_sakazakii	TBD	p505108-MDR	Esterase	0	0	0	0	0	0	0	0	0	0	0	0	0	0	0	0	0	0	0	0	0	0	0	0	0	0	0	0	0	0	0	0	0	0	0	0	0	0	0	0	0	0	0	0	0	0
Cronobacter_sakazakii	TBD	p505108-MDR	GNAT	0	0	0	0	0	0	0	0	0	0	0	0	0	0	0	0	0	0	0	0	0	0	0	0	0	0	0	0	0	0	0	0	0	0	0	0	0	0	0	0	0	0	0	0	0	0
Cronobacter_sakazakii	TBD	p505108-MDR	HNH	0	0	0	0	0	0	0	0	0	0	0	0	0	0	0	0	0	0	0	0	0	0	0	0	0	0	0	0	0	0	0	0	0	0	0	0	0	0	0	0	0	0	0	0	0	0
Cronobacter_sakazakii	TBD	p505108-MDR	Hypothetical_protein_1041	0	0	0	0	0	0	0	0	0	0	0	0	0	0	0	0	0	0	0	0	0	0	0	0	0	0	0	0	0	0	0	0	0	0	0	0	0	0	0	0	0	0	0	0	0	0
Cronobacter_sakazakii	TBD	p505108-MDR	Hypothetical_protein_1053	0	0	0	0	0	0	0	0	0	0	0	0	0	0	0	0	0	0	0	0	0	0	0	0	0	0	0	0	0	0	0	0	0	0	0	0	0	0	0	0	0	0	0	0	0	0
Cronobacter_sakazakii	TBD	p505108-MDR	Hypothetical_protein_1083	0	0	0	0	0	0	0	0	0	0	0	0	0	0	0	0	0	0	0	0	0	0	0	0	0	0	0	0	0	0	0	0	0	0	0	0	0	0	0	0	0	0	0	0	0	0
Cronobacter_sakazakii	TBD	p505108-MDR	Hypothetical_protein_1113	0	0	0	0	0	0	0	0	0	0	0	0	0	0	0	0	0	0	0	0	0	0	0	0	0	0	0	0	0	0	0	0	0	0	0	0	0	0	0	0	0	0	0	0	0	0
Cronobacter_sakazakii	TBD	p505108-MDR	Hypothetical_protein_1128	0	0	0	0	0	0	0	0	0	0	0	0	0	0	0	0	0	0	0	0	0	0	0	0	0	0	0	0	0	0	0	0	0	0	0	0	0	0	0	0	0	0	0	0	0	0
Cronobacter_sakazakii	TBD	p505108-MDR	Hypothetical_protein_117	0	0	0	0	0	0	0	0	0	0	0	0	0	0	0	0	0	0	0	0	0	0	0	0	0	0	0	0	0	0	0	0	0	0	0	0	0	0	0	0	0	0	0	0	0	0
Cronobacter_sakazakii	TBD	p505108-MDR	Hypothetical_protein_1209	0	0	0	0	0	0	0	0	0	0	0	0	0	0	0	0	0	0	0	0	0	0	0	0	0	0	0	0	0	0	0	0	0	0	0	0	0	0	0	0	0	0	0	0	0	0
Cronobacter_sakazakii	TBD	p505108-MDR	Hypothetical_protein_126	0	0	0	0	0	0	0	0	0	0	0	0	0	0	0	0	0	0	0	0	0	0	0	0	0	0	0	0	0	0	0	0	0	0	0	0	0	0	0	0	0	0	0	0	0	0
Cronobacter_sakazakii	TBD	p505108-MDR	Hypothetical_protein_132	0	0	0	0	0	0	0	0	0	0	0	0	0	0	0	0	0	0	0	0	0	0	0	0	0	0	0	0	0	0	0	0	0	0	0	0	0	0	0	0	0	0	0	0	0	0
Cronobacter_sakazakii	TBD	p505108-MDR	Hypothetical_protein_1320	0	0	0	0	0	0	0	0	0	0	0	0	0	0	0	0	0	0	0	0	0	0	0	0	0	0	0	0	0	0	0	0	0	0	0	0	0	0	0	0	0	0	0	0	0	0
Cronobacter_sakazakii	TBD	p505108-MDR	Hypothetical_protein_135	0	0	0	0	0	0	0	0	0	0	0	0	0	0	0	0	0	0	0	0	0	0	0	0	0	0	0	0	0	0	0	0	0	0	0	0	0	0	0	0	0	0	0	0	0	0
Cronobacter_sakazakii	TBD	p505108-MDR	Hypothetical_protein_1389	0	0	0	0	0	0	0	0	0	0	0	0	0	0	0	0	0	0	0	0	0	0	0	0	0	0	0	0	0	0	0	0	0	0	0	0	0	0	0	0	0	0	0	0	0	0
Cronobacter_sakazakii	TBD	p505108-MDR	Hypothetical_protein_141	0	0	0	0	0	0	0	0	0	0	0	0	0	0	0	0	0	0	0	0	0	0	0	0	0	0	0	0	0	0	0	0	0	0	0	0	0	0	0	0	0	0	0	0	0	0
Cronobacter_sakazakii	TBD	p505108-MDR	Hypothetical_protein_147	0	0	0	0	0	0	0	0	0	0	0	0	0	0	0	0	0	0	0	0	0	0	0	0	0	0	0	0	0	0	0	0	0	0	0	0	0	0	0	0	0	0	0	0	0	0
Cronobacter_sakazakii	TBD	p505108-MDR	Hypothetical_protein_150	0	0	0	0	0	0	0	0	0	0	0	0	0	0	0	0	0	0	0	0	0	0	0	0	0	0	0	0	0	0	0	0	0	0	0	0	0	0	0	0	0	0	0	0	0	0
Cronobacter_sakazakii	TBD	p505108-MDR	Hypothetical_protein_156	0	0	0	0	0	0	0	0	0	0	0	0	0	0	0	0	0	0	0	0	0	0	0	0	0	0	0	0	0	0	0	0	0	0	0	0	0	0	0	0	0	0	0	0	0	0
Cronobacter_sakazakii	TBD	p505108-MDR	Hypothetical_protein_162	0	0	0	0	0	0	0	0	0	0	0	0	0	0	0	0	0	0	0	0	0	0	0	0	0	0	0	0	0	0	0	0	0	0	0	0	0	0	0	0	0	0	0	0	0	0
Cronobacter_sakazakii	TBD	p505108-MDR	Hypothetical_protein_168	0	0	0	0	0	0	0	0	0	0	0	0	0	0	0	0	0	0	0	0	0	0	0	0	0	0	0	0	0	0	0	0	0	0	0	0	0	0	0	0	0	0	0	0	0	0
Cronobacter_sakazakii	TBD	p505108-MDR	Hypothetical_protein_174	0	0	0	0	0	0	0	0	0	0	0	0	0	0	0	0	0	0	0	0	0	0	0	0	0	0	0	0	0	0	0	0	0	0	0	0	0	0	0	0	0	0	0	0	0	0
Cronobacter_sakazakii	TBD	p505108-MDR	Hypothetical_protein_177	0	0	0	0	0	0	0	0	0	0	0	0	0	0	0	0	0	0	0	0	0	0	0	0	0	0	0	0	0	0	0	0	0	0	0	0	0	0	0	0	0	0	0	0	0	0
Cronobacter_sakazakii	TBD	p505108-MDR	Hypothetical_protein_189	0	0	0	0	0	0	0	0	0	0	0	0	0	0	0	0	0	0	0	0	0	0	0	0	0	0	0	0	0	0	0	0	0	0	0	0	0	0	0	0	0	0	0	0	0	0
Cronobacter_sakazakii	TBD	p505108-MDR	Hypothetical_protein_192	0	0	0	0	0	0	0	0	0	0	0	0	0	0	0	0	0	0	0	0	0	0	0	0	0	0	0	0	0	0	0	0	0	0	0	0	0	0	0	0	0	0	0	0	0	0
Cronobacter_sakazakii	TBD	p505108-MDR	Hypothetical_protein_195	0	0	0	0	0	0	0	0	0	0	0	0	0	0	0	0	0	0	0	0	0	0	0	0	0	0	0	0	0	0	0	0	0	0	0	0	0	0	0	0	0	0	0	0	0	0
Cronobacter_sakazakii	TBD	p505108-MDR	Hypothetical_protein_198	0	0	0	0	0	0	0	0	0	0	0	0	0	0	0	0	0	0	0	0	0	0	0	0	0	0	0	0	0	0	0	0	0	0	0	0	0	0	0	0	0	0	0	0	0	0
Cronobacter_sakazakii	TBD	p505108-MDR	Hypothetical_protein_201	0	0	0	0	0	0	0	0	0	0	0	0	0	0	0	0	0	0	0	0	0	0	0	0	0	0	0	0	0	0	0	0	0	0	0	0	0	0	0	0	0	0	0	0	0	0
Cronobacter_sakazakii	TBD	p505108-MDR	Hypothetical_protein_204	0	0	0	0	0	0	0	0	0	0	0	0	0	0	0	0	0	0	0	0	0	0	0	0	0	0	0	0	0	0	0	0	0	0	0	0	0	0	0	0	0	0	0	0	0	0
Cronobacter_sakazakii	TBD	p505108-MDR	Hypothetical_protein_207	0	0	0	0	0	0	0	0	0	0	0	0	0	0	0	0	0	0	0	0	0	0	0	0	0	0	0	0	0	0	0	0	0	0	0	0	0	0	0	0	0	0	0	0	0	0
Cronobacter_sakazakii	TBD	p505108-MDR	Hypothetical_protein_216	0	0	0	0	0	0	0	0	0	0	0	0	0	0	0	0	0	0	0	0	0	0	0	0	0	0	0	0	0	0	0	0	0	0	0	0	0	0	0	0	0	0	0	0	0	0
Cronobacter_sakazakii	TBD	p505108-MDR	Hypothetical_protein_222	0	0	0	0	0	0	0	0	0	0	0	0	0	0	0	0	0	0	0	0	0	0	0	0	0	0	0	0	0	0	0	0	0	0	0	0	0	0	0	0	0	0	0	0	0	0
Cronobacter_sakazakii	TBD	p505108-MDR	Hypothetical_protein_225	0	0	0	0	0	0	0	0	0	0	0	0	0	0	0	0	0	0	0	0	0	0	0	0	0	0	0	0	0	0	0	0	0	0	0	0	0	0	0	0	0	0	0	0	0	0
Cronobacter_sakazakii	TBD	p505108-MDR	Hypothetical_protein_231	0	0	0	0	0	0	0	0	0	0	0	0	0	0	0	0	0	0	0	0	0	0	0	0	0	0	0	0	0	0	0	0	0	0	0	0	0	0	0	0	0	0	0	0	0	0
Cronobacter_sakazakii	TBD	p505108-MDR	Hypothetical_protein_234	0	0	0	0	0	0	0	0	0	0	0	0	0	0	0	0	0	0	0	0	0	0	0	0	0	0	0	0	0	0	0	0	0	0	0	0	0	0	0	0	0	0	0	0	0	0
Cronobacter_sakazakii	TBD	p505108-MDR	Hypothetical_protein_240	0	0	0	0	0	0	0	0	0	0	0	0	0	0	0	0	0	0	0	0	0	0	0	0	0	0	0	0	0	0	0	0	0	0	0	0	0	0	0	0	0	0	0	0	0	0
Cronobacter_sakazakii	TBD	p505108-MDR	Hypothetical_protein_2421	0	0	0	0	0	0	0	0	0	0	0	0	0	0	0	0	0	0	0	0	0	0	0	0	0	0	0	0	0	0	0	0	0	0	0	0	0	0	0	0	0	0	0	0	0	0
Cronobacter_sakazakii	TBD	p505108-MDR	Hypothetical_protein_2457	0	0	0	0	0	0	0	0	0	0	0	0	0	0	0	0	0	0	0	0	0	0	0	0	0	0	0	0	0	0	0	0	0	0	0	0	0	0	0	0	0	0	0	0	0	0
Cronobacter_sakazakii	TBD	p505108-MDR	Hypothetical_protein_252	0	0	0	0	0	0	0	0	0	0	0	0	0	0	0	0	0	0	0	0	0	0	0	0	0	0	0	0	0	0	0	0	0	0	0	0	0	0	0	0	0	0	0	0	0	0
Cronobacter_sakazakii	TBD	p505108-MDR	Hypothetical_protein_255	0	0	0	0	0	0	0	0	0	0	0	0	0	0	0	0	0	0	0	0	0	0	0	0	0	0	0	0	0	0	0	0	0	0	0	0	0	0	0	0	0	0	0	0	0	0
Cronobacter_sakazakii	TBD	p505108-MDR	Hypothetical_protein_258	0	0	0	0	0	0	0	0	0	0	0	0	0	0	0	0	0	0	0	0	0	0	0	0	0	0	0	0	0	0	0	0	0	0	0	0	0	0	0	0	0	0	0	0	0	0
Cronobacter_sakazakii	TBD	p505108-MDR	Hypothetical_protein_264	0	0	0	0	0	0	0	0	0	0	0	0	0	0	0	0	0	0	0	0	0	0	0	0	0	0	0	0	0	0	0	0	0	0	0	0	0	0	0	0	0	0	0	0	0	0
Cronobacter_sakazakii	TBD	p505108-MDR	Hypothetical_protein_273	0	0	0	0	0	0	0	0	0	0	0	0	0	0	0	0	0	0	0	0	0	0	0	0	0	0	0	0	0	0	0	0	0	0	0	0	0	0	0	0	0	0	0	0	0	0
Cronobacter_sakazakii	TBD	p505108-MDR	Hypothetical_protein_276	0	0	0	0	0	0	0	0	0	0	0	0	0	0	0	0	0	0	0	0	0	0	0	0	0	0	0	0	0	0	0	0	0	0	0	0	0	0	0	0	0	0	0	0	0	0
Cronobacter_sakazakii	TBD	p505108-MDR	Hypothetical_protein_282	0	0	0	0	0	0	0	0	0	0	0	0	0	0	0	0	0	0	0	0	0	0	0	0	0	0	0	0	0	0	0	0	0	0	0	0	0	0	0	0	0	0	0	0	0	0
Cronobacter_sakazakii	TBD	p505108-MDR	Hypothetical_protein_297	0	0	0	0	0	0	0	0	0	0	0	0	0	0	0	0	0	0	0	0	0	0	0	0	0	0	0	0	0	0	0	0	0	0	0	0	0	0	0	0	0	0	0	0	0	0
Cronobacter_sakazakii	TBD	p505108-MDR	Hypothetical_protein_300	0	0	0	0	0	0	0	0	0	0	0	0	0	0	0	0	0	0	0	0	0	0	0	0	0	0	0	0	0	0	0	0	0	0	0	0	0	0	0	0	0	0	0	0	0	0
Cronobacter_sakazakii	TBD	p505108-MDR	Hypothetical_protein_306	0	0	0	0	0	0	0	0	0	0	0	0	0	0	0	0	0	0	0	0	0	0	0	0	0	0	0	0	0	0	0	0	0	0	0	0	0	0	0	0	0	0	0	0	0	0
Cronobacter_sakazakii	TBD	p505108-MDR	Hypothetical_protein_312	0	0	0	0	0	0	0	0	0	0	0	0	0	0	0	0	0	0	0	0	0	0	0	0	0	0	0	0	0	0	0	0	0	0	0	0	0	0	0	0	0	0	0	0	0	0
Cronobacter_sakazakii	TBD	p505108-MDR	Hypothetical_protein_321	0	0	0	0	0	0	0	0	0	0	0	0	0	0	0	0	0	0	0	0	0	0	0	0	0	0	0	0	0	0	0	0	0	0	0	0	0	0	0	0	0	0	0	0	0	0
Cronobacter_sakazakii	TBD	p505108-MDR	Hypothetical_protein_324	0	0	0	0	0	0	0	0	0	0	0	0	0	0	0	0	0	0	0	0	0	0	0	0	0	0	0	0	0	0	0	0	0	0	0	0	0	0	0	0	0	0	0	0	0	0
Cronobacter_sakazakii	TBD	p505108-MDR	Hypothetical_protein_327	0	0	0	0	0	0	0	0	0	0	0	0	0	0	0	0	0	0	0	0	0	0	0	0	0	0	0	0	0	0	0	0	0	0	0	0	0	0	0	0	0	0	0	0	0	0
Cronobacter_sakazakii	TBD	p505108-MDR	Hypothetical_protein_345	0	0	0	0	0	0	0	0	0	0	0	0	0	0	0	0	0	0	0	0	0	0	0	0	0	0	0	0	0	0	0	0	0	0	0	0	0	0	0	0	0	0	0	0	0	0
Cronobacter_sakazakii	TBD	p505108-MDR	Hypothetical_protein_354	0	0	0	0	0	0	0	0	0	0	0	0	0	0	0	0	0	0	0	0	0	0	0	0	0	0	0	0	0	0	0	0	0	0	0	0	0	0	0	0	0	0	0	0	0	0
Cronobacter_sakazakii	TBD	p505108-MDR	Hypothetical_protein_357	0	0	0	0	0	0	0	0	0	0	0	0	0	0	0	0	0	0	0	0	0	0	0	0	0	0	0	0	0	0	0	0	0	0	0	0	0	0	0	0	0	0	0	0	0	0
Cronobacter_sakazakii	TBD	p505108-MDR	Hypothetical_protein_369	0	0	0	0	0	0	0	0	0	0	0	0	0	0	0	0	0	0	0	0	0	0	0	0	0	0	0	0	0	0	0	0	0	0	0	0	0	0	0	0	0	0	0	0	0	0
Cronobacter_sakazakii	TBD	p505108-MDR	Hypothetical_protein_378	0	0	0	0	0	0	0	0	0	0	0	0	0	0	0	0	0	0	0	0	0	0	0	0	0	0	0	0	0	0	0	0	0	0	0	0	0	0	0	0	0	0	0	0	0	0
Cronobacter_sakazakii	TBD	p505108-MDR	Hypothetical_protein_381	0	0	0	0	0	0	0	0	0	0	0	0	0	0	0	0	0	0	0	0	0	0	0	0	0	0	0	0	0	0	0	0	0	0	0	0	0	0	0	0	0	0	0	0	0	0
Cronobacter_sakazakii	TBD	p505108-MDR	Hypothetical_protein_384	0	0	0	0	0	0	0	0	0	0	0	0	0	0	0	0	0	0	0	0	0	0	0	0	0	0	0	0	0	0	0	0	0	0	0	0	0	0	0	0	0	0	0	0	0	0
Cronobacter_sakazakii	TBD	p505108-MDR	Hypothetical_protein_393	0	0	0	0	0	0	0	0	0	0	0	0	0	0	0	0	0	0	0	0	0	0	0	0	0	0	0	0	0	0	0	0	0	0	0	0	0	0	0	0	0	0	0	0	0	0
Cronobacter_sakazakii	TBD	p505108-MDR	Hypothetical_protein_411	0	0	0	0	0	0	0	0	0	0	0	0	0	0	0	0	0	0	0	0	0	0	0	0	0	0	0	0	0	0	0	0	0	0	0	0	0	0	0	0	0	0	0	0	0	0
Cronobacter_sakazakii	TBD	p505108-MDR	Hypothetical_protein_423	0	0	0	0	0	0	0	0	0	0	0	0	0	0	0	0	0	0	0	0	0	0	0	0	0	0	0	0	0	0	0	0	0	0	0	0	0	0	0	0	0	0	0	0	0	0
Cronobacter_sakazakii	TBD	p505108-MDR	Hypothetical_protein_426	0	0	0	0	0	0	0	0	0	0	0	0	0	0	0	0	0	0	0	0	0	0	0	0	0	0	0	0	0	0	0	0	0	0	0	0	0	0	0	0	0	0	0	0	0	0
Cronobacter_sakazakii	TBD	p505108-MDR	Hypothetical_protein_429	0	0	0	0	0	0	0	0	0	0	0	0	0	0	0	0	0	0	0	0	0	0	0	0	0	0	0	0	0	0	0	0	0	0	0	0	0	0	0	0	0	0	0	0	0	0
Cronobacter_sakazakii	TBD	p505108-MDR	Hypothetical_protein_4305	0	0	0	0	0	0	0	0	0	0	0	0	0	0	0	0	0	0	0	0	0	0	0	0	0	0	0	0	0	0	0	0	0	0	0	0	0	0	0	0	0	0	0	0	0	0
Cronobacter_sakazakii	TBD	p505108-MDR	Hypothetical_protein_432	0	0	0	0	0	0	0	0	0	0	0	0	0	0	0	0	0	0	0	0	0	0	0	0	0	0	0	0	0	0	0	0	0	0	0	0	0	0	0	0	0	0	0	0	0	0
Cronobacter_sakazakii	TBD	p505108-MDR	Hypothetical_protein_438	0	0	0	0	0	0	0	0	0	0	0	0	0	0	0	0	0	0	0	0	0	0	0	0	0	0	0	0	0	0	0	0	0	0	0	0	0	0	0	0	0	0	0	0	0	0
Cronobacter_sakazakii	TBD	p505108-MDR	Hypothetical_protein_456	0	0	0	0	0	0	0	0	0	0	0	0	0	0	0	0	0	0	0	0	0	0	0	0	0	0	0	0	0	0	0	0	0	0	0	0	0	0	0	0	0	0	0	0	0	0
Cronobacter_sakazakii	TBD	p505108-MDR	Hypothetical_protein_465	0	0	0	0	0	0	0	0	0	0	0	0	0	0	0	0	0	0	0	0	0	0	0	0	0	0	0	0	0	0	0	0	0	0	0	0	0	0	0	0	0	0	0	0	0	0
Cronobacter_sakazakii	TBD	p505108-MDR	Hypothetical_protein_471	0	0	0	0	0	0	0	0	0	0	0	0	0	0	0	0	0	0	0	0	0	0	0	0	0	0	0	0	0	0	0	0	0	0	0	0	0	0	0	0	0	0	0	0	0	0
Cronobacter_sakazakii	TBD	p505108-MDR	Hypothetical_protein_492	0	0	0	0	0	0	0	0	0	0	0	0	0	0	0	0	0	0	0	0	0	0	0	0	0	0	0	0	0	0	0	0	0	0	0	0	0	0	0	0	0	0	0	0	0	0
Cronobacter_sakazakii	TBD	p505108-MDR	Hypothetical_protein_501	0	0	0	0	0	0	0	0	0	0	0	0	0	0	0	0	0	0	0	0	0	0	0	0	0	0	0	0	0	0	0	0	0	0	0	0	0	0	0	0	0	0	0	0	0	0
Cronobacter_sakazakii	TBD	p505108-MDR	Hypothetical_protein_504	0	0	0	0	0	0	0	0	0	0	0	0	0	0	0	0	0	0	0	0	0	0	0	0	0	0	0	0	0	0	0	0	0	0	0	0	0	0	0	0	0	0	0	0	0	0
Cronobacter_sakazakii	TBD	p505108-MDR	Hypothetical_protein_507	0	0	0	0	0	0	0	0	0	0	0	0	0	0	0	0	0	0	0	0	0	0	0	0	0	0	0	0	0	0	0	0	0	0	0	0	0	0	0	0	0	0	0	0	0	0
Cronobacter_sakazakii	TBD	p505108-MDR	Hypothetical_protein_522	0	0	0	0	0	0	0	0	0	0	0	0	0	0	0	0	0	0	0	0	0	0	0	0	0	0	0	0	0	0	0	0	0	0	0	0	0	0	0	0	0	0	0	0	0	0
Cronobacter_sakazakii	TBD	p505108-MDR	Hypothetical_protein_525	0	0	0	0	0	0	0	0	0	0	0	0	0	0	0	0	0	0	0	0	0	0	0	0	0	0	0	0	0	0	0	0	0	0	0	0	0	0	0	0	0	0	0	0	0	0
Cronobacter_sakazakii	TBD	p505108-MDR	Hypothetical_protein_537	0	0	0	0	0	0	0	0	0	0	0	0	0	0	0	0	0	0	0	0	0	0	0	0	0	0	0	0	0	0	0	0	0	0	0	0	0	0	0	0	0	0	0	0	0	0
Cronobacter_sakazakii	TBD	p505108-MDR	Hypothetical_protein_558	0	0	0	0	0	0	0	0	0	0	0	0	0	0	0	0	0	0	0	0	0	0	0	0	0	0	0	0	0	0	0	0	0	0	0	0	0	0	0	0	0	0	0	0	0	0
Cronobacter_sakazakii	TBD	p505108-MDR	Hypothetical_protein_588	0	0	0	0	0	0	0	0	0	0	0	0	0	0	0	0	0	0	0	0	0	0	0	0	0	0	0	0	0	0	0	0	0	0	0	0	0	0	0	0	0	0	0	0	0	0
Cronobacter_sakazakii	TBD	p505108-MDR	Hypothetical_protein_603	0	0	0	0	0	0	0	0	0	0	0	0	0	0	0	0	0	0	0	0	0	0	0	0	0	0	0	0	0	0	0	0	0	0	0	0	0	0	0	0	0	0	0	0	0	0
Cronobacter_sakazakii	TBD	p505108-MDR	Hypothetical_protein_609	0	0	0	0	0	0	0	0	0	0	0	0	0	0	0	0	0	0	0	0	0	0	0	0	0	0	0	0	0	0	0	0	0	0	0	0	0	0	0	0	0	0	0	0	0	0
Cronobacter_sakazakii	TBD	p505108-MDR	Hypothetical_protein_627	0	0	0	0	0	0	0	0	0	0	0	0	0	0	0	0	0	0	0	0	0	0	0	0	0	0	0	0	0	0	0	0	0	0	0	0	0	0	0	0	0	0	0	0	0	0
Cronobacter_sakazakii	TBD	p505108-MDR	Hypothetical_protein_657	0	0	0	0	0	0	0	0	0	0	0	0	0	0	0	0	0	0	0	0	0	0	0	0	0	0	0	0	0	0	0	0	0	0	0	0	0	0	0	0	0	0	0	0	0	0
Cronobacter_sakazakii	TBD	p505108-MDR	Hypothetical_protein_666	0	0	0	0	0	0	0	0	0	0	0	0	0	0	0	0	0	0	0	0	0	0	0	0	0	0	0	0	0	0	0	0	0	0	0	0	0	0	0	0	0	0	0	0	0	0
Cronobacter_sakazakii	TBD	p505108-MDR	Hypothetical_protein_717	0	0	0	0	0	0	0	0	0	0	0	0	0	0	0	0	0	0	0	0	0	0	0	0	0	0	0	0	0	0	0	0	0	0	0	0	0	0	0	0	0	0	0	0	0	0
Cronobacter_sakazakii	TBD	p505108-MDR	Hypothetical_protein_738	0	0	0	0	0	0	0	0	0	0	0	0	0	0	0	0	0	0	0	0	0	0	0	0	0	0	0	0	0	0	0	0	0	0	0	0	0	0	0	0	0	0	0	0	0	0
Cronobacter_sakazakii	TBD	p505108-MDR	Hypothetical_protein_765	0	0	0	0	0	0	0	0	0	0	0	0	0	0	0	0	0	0	0	0	0	0	0	0	0	0	0	0	0	0	0	0	0	0	0	0	0	0	0	0	0	0	0	0	0	0
Cronobacter_sakazakii	TBD	p505108-MDR	Hypothetical_protein_792	0	0	0	0	0	0	0	0	0	0	0	0	0	0	0	0	0	0	0	0	0	0	0	0	0	0	0	0	0	0	0	0	0	0	0	0	0	0	0	0	0	0	0	0	0	0
Cronobacter_sakazakii	TBD	p505108-MDR	Hypothetical_protein_819	0	0	0	0	0	0	0	0	0	0	0	0	0	0	0	0	0	0	0	0	0	0	0	0	0	0	0	0	0	0	0	0	0	0	0	0	0	0	0	0	0	0	0	0	0	0
Cronobacter_sakazakii	TBD	p505108-MDR	Hypothetical_protein_837	0	0	0	0	0	0	0	0	0	0	0	0	0	0	0	0	0	0	0	0	0	0	0	0	0	0	0	0	0	0	0	0	0	0	0	0	0	0	0	0	0	0	0	0	0	0
Cronobacter_sakazakii	TBD	p505108-MDR	Hypothetical_protein_855	0	0	0	0	0	0	0	0	0	0	0	0	0	0	0	0	0	0	0	0	0	0	0	0	0	0	0	0	0	0	0	0	0	0	0	0	0	0	0	0	0	0	0	0	0	0
Cronobacter_sakazakii	TBD	p505108-MDR	Hypothetical_protein_873	0	0	0	0	0	0	0	0	0	0	0	0	0	0	0	0	0	0	0	0	0	0	0	0	0	0	0	0	0	0	0	0	0	0	0	0	0	0	0	0	0	0	0	0	0	0
Cronobacter_sakazakii	TBD	p505108-MDR	Hypothetical_protein_879	0	0	0	0	0	0	0	0	0	0	0	0	0	0	0	0	0	0	0	0	0	0	0	0	0	0	0	0	0	0	0	0	0	0	0	0	0	0	0	0	0	0	0	0	0	0
Cronobacter_sakazakii	TBD	p505108-MDR	Hypothetical_protein_897	0	0	0	0	0	0	0	0	0	0	0	0	0	0	0	0	0	0	0	0	0	0	0	0	0	0	0	0	0	0	0	0	0	0	0	0	0	0	0	0	0	0	0	0	0	0
Cronobacter_sakazakii	TBD	p505108-MDR	Hypothetical_protein_906	0	0	0	0	0	0	0	0	0	0	0	0	0	0	0	0	0	0	0	0	0	0	0	0	0	0	0	0	0	0	0	0	0	0	0	0	0	0	0	0	0	0	0	0	0	0
Cronobacter_sakazakii	TBD	p505108-MDR	Hypothetical_protein_921	0	0	0	0	0	0	0	0	0	0	0	0	0	0	0	0	0	0	0	0	0	0	0	0	0	0	0	0	0	0	0	0	0	0	0	0	0	0	0	0	0	0	0	0	0	0
Cronobacter_sakazakii	TBD	p505108-MDR	Hypothetical_protein_936	0	0	0	0	0	0	0	0	0	0	0	0	0	0	0	0	0	0	0	0	0	0	0	0	0	0	0	0	0	0	0	0	0	0	0	0	0	0	0	0	0	0	0	0	0	0
Cronobacter_sakazakii	TBD	p505108-MDR	Hypothetical_protein_939	0	0	0	0	0	0	0	0	0	0	0	0	0	0	0	0	0	0	0	0	0	0	0	0	0	0	0	0	0	0	0	0	0	0	0	0	0	0	0	0	0	0	0	0	0	0
Cronobacter_sakazakii	TBD	p505108-MDR	Hypothetical_protein_945	0	0	0	0	0	0	0	0	0	0	0	0	0	0	0	0	0	0	0	0	0	0	0	0	0	0	0	0	0	0	0	0	0	0	0	0	0	0	0	0	0	0	0	0	0	0
Cronobacter_sakazakii	TBD	p505108-MDR	Hypothetical_protein_963	0	0	0	0	0	0	0	0	0	0	0	0	0	0	0	0	0	0	0	0	0	0	0	0	0	0	0	0	0	0	0	0	0	0	0	0	0	0	0	0	0	0	0	0	0	0
Cronobacter_sakazakii	TBD	p505108-MDR	Hypothetical_protein_978	0	0	0	0	0	0	0	0	0	0	0	0	0	0	0	0	0	0	0	0	0	0	0	0	0	0	0	0	0	0	0	0	0	0	0	0	0	0	0	0	0	0	0	0	0	0
Cronobacter_sakazakii	TBD	p505108-MDR	Ig-like_domain_repeat_protein	0	0	0	0	0	0	0	0	0	0	0	0	0	0	0	0	0	0	0	0	0	0	0	0	0	0	0	0	0	0	0	0	0	0	0	0	0	0	0	0	0	0	0	0	0	0
Cronobacter_sakazakii	TBD	p505108-MDR	Inner_membrane_protein	0	0	0	0	0	0	0	0	0	0	0	0	0	0	0	0	0	0	0	0	0	0	0	0	0	0	0	0	0	0	0	0	0	0	0	0	0	0	0	0	0	0	0	0	0	0
Cronobacter_sakazakii	TBD	p505108-MDR	Large_extracellular_alpha-helical_protein	0	0	0	0	0	0	0	0	0	0	0	0	0	0	0	0	0	0	0	0	0	0	0	0	0	0	0	0	0	0	0	0	0	0	0	0	0	0	0	0	0	0	0	0	0	0
Cronobacter_sakazakii	TBD	p505108-MDR	Lipoprotein	0	0	0	0	0	0	0	0	0	0	0	0	0	0	0	0	0	0	0	0	0	0	0	0	0	0	0	0	0	0	0	0	0	0	0	0	0	0	0	0	0	0	0	0	0	0
Cronobacter_sakazakii	TBD	p505108-MDR	LysR_family_transcriptional_regulator	0	0	0	0	0	0	0	0	0	0	0	0	0	0	0	0	0	0	0	0	0	0	0	0	0	0	0	0	0	0	0	0	0	0	0	0	0	0	0	0	0	0	0	0	0	0
Cronobacter_sakazakii	TBD	p505108-MDR	MFS	0	0	0	0	0	0	0	0	0	0	0	0	0	0	0	0	0	0	0	0	0	0	0	0	0	0	0	0	0	0	0	0	0	0	0	0	0	0	0	0	0	0	0	0	0	0
Cronobacter_sakazakii	TBD	p505108-MDR	Metal_dependent_hydrolase	0	0	0	0	0	0	0	0	0	0	0	0	0	0	0	0	0	0	0	0	0	0	0	0	0	0	0	0	0	0	0	0	0	0	0	0	0	0	0	0	0	0	0	0	0	0
Cronobacter_sakazakii	TBD	p505108-MDR	NAD(P)-dependent_oxidoreductase	0	0	0	0	0	0	0	0	0	0	0	0	0	0	0	0	0	0	0	0	0	0	0	0	0	0	0	0	0	0	0	0	0	0	0	0	0	0	0	0	0	0	0	0	0	0
Cronobacter_sakazakii	TBD	p505108-MDR	Nuclease	0	0	0	0	0	0	0	0	0	0	0	0	0	0	0	0	0	0	0	0	0	0	0	0	0	0	0	0	0	0	0	0	0	0	0	0	0	0	0	0	0	0	0	0	0	0
Cronobacter_sakazakii	TBD	p505108-MDR	Phosphoribosyl_transferase	0	0	0	0	0	0	0	0	0	0	0	0	0	0	0	0	0	0	0	0	0	0	0	0	0	0	0	0	0	0	0	0	0	0	0	0	0	0	0	0	0	0	0	0	0	0
Cronobacter_sakazakii	TBD	p505108-MDR	Primase	0	0	0	0	0	0	0	0	0	0	0	0	0	0	0	0	0	0	0	0	0	0	0	0	0	0	0	0	0	0	0	0	0	0	0	0	0	0	0	0	0	0	0	0	0	0
Cronobacter_sakazakii	TBD	p505108-MDR	Protein_Kinase	0	0	0	0	0	0	0	0	0	0	0	0	0	0	0	0	0	0	0	0	0	0	0	0	0	0	0	0	0	0	0	0	0	0	0	0	0	0	0	0	0	0	0	0	0	0
Cronobacter_sakazakii	TBD	p505108-MDR	Recombinase	0	0	0	0	0	0	0	0	0	0	0	0	0	0	0	0	0	0	0	0	0	0	0	0	0	0	0	0	0	0	0	0	0	0	0	0	0	0	0	0	0	0	0	0	0	0
Cronobacter_sakazakii	TBD	p505108-MDR	Soluble_lytic_murein_transglycosylase-related_regulatory_protein	0	0	0	0	0	0	0	0	0	0	0	0	0	0	0	0	0	0	0	0	0	0	0	0	0	0	0	0	0	0	0	0	0	0	0	0	0	0	0	0	0	0	0	0	0	0
Cronobacter_sakazakii	TBD	p505108-MDR	VWA	0	0	0	0	0	0	0	0	0	0	0	0	0	0	0	0	0	0	0	0	0	0	0	0	0	0	0	0	0	0	0	0	0	0	0	0	0	0	0	0	0	0	0	0	0	0
Cronobacter_sakazakii	TBD	p505108-MDR	YdeI	0	0	0	0	0	0	0	0	0	0	0	0	0	0	0	0	0	0	0	0	0	0	0	0	0	0	0	0	0	0	0	0	0	0	0	0	0	0	0	0	0	0	0	0	0	0
Cronobacter_sakazakii	TBD	p505108-MDR	aacA27	0	0	0	0	0	0	0	0	0	0	0	0	0	0	0	0	0	0	0	0	0	0	0	0	0	0	0	0	0	0	0	0	0	0	0	0	0	0	0	0	0	0	0	0	0	0
Cronobacter_sakazakii	TBD	p505108-MDR	aacA4cr	0	0	0	0	0	0	0	0	0	0	0	0	0	0	0	0	0	0	0	0	0	0	0	0	0	0	0	0	0	0	0	0	0	0	0	0	0	0	0	0	0	0	0	0	0	0
Cronobacter_sakazakii	TBD	p505108-MDR	aacC3	0	0	0	0	0	0	0	0	0	0	0	0	0	0	0	0	0	0	0	0	0	0	0	0	0	0	0	0	0	0	0	0	0	0	0	0	0	0	0	0	0	0	0	0	0	0
Cronobacter_sakazakii	TBD	p505108-MDR	adhC	0	0	0	0	0	0	0	0	0	0	0	0	0	0	0	0	0	0	0	0	0	0	0	0	0	0	0	0	0	0	0	0	0	0	0	0	0	0	0	0	0	0	0	0	0	0
Cronobacter_sakazakii	TBD	p505108-MDR	ampR	0	0	0	0	0	0	0	0	0	0	0	0	0	0	0	0	0	0	0	0	0	0	0	0	0	0	0	0	0	0	0	0	0	0	0	0	0	0	0	0	0	0	0	0	0	0
Cronobacter_sakazakii	TBD	p505108-MDR	aphA1	0	0	0	0	0	0	0	0	0	0	0	0	0	0	0	0	0	0	0	0	0	0	0	0	0	0	0	0	0	0	0	0	0	0	0	0	0	0	0	0	0	0	0	0	0	0
Cronobacter_sakazakii	TBD	p505108-MDR	arr7	0	0	0	0	0	0	0	0	0	0	0	0	0	0	0	0	0	0	0	0	0	0	0	0	0	0	0	0	0	0	0	0	0	0	0	0	0	0	0	0	0	0	0	0	0	0
Cronobacter_sakazakii	TBD	p505108-MDR	arsB	0	0	0	0	0	0	0	0	0	0	0	0	0	0	0	0	0	0	0	0	0	0	0	0	0	0	0	0	0	0	0	0	0	0	0	0	0	0	0	0	0	0	0	0	0	0
Cronobacter_sakazakii	TBD	p505108-MDR	arsC	0	0	0	0	0	0	0	0	0	0	0	0	0	0	0	0	0	0	0	0	0	0	0	0	0	0	0	0	0	0	0	0	0	0	0	0	0	0	0	0	0	0	0	0	0	0
Cronobacter_sakazakii	TBD	p505108-MDR	arsH	0	0	0	0	0	0	0	0	0	0	0	0	0	0	0	0	0	0	0	0	0	0	0	0	0	0	0	0	0	0	0	0	0	0	0	0	0	0	0	0	0	0	0	0	0	0
Cronobacter_sakazakii	TBD	p505108-MDR	arsR	0	0	0	0	0	0	0	0	0	0	0	0	0	0	0	0	0	0	0	0	0	0	0	0	0	0	0	0	0	0	0	0	0	0	0	0	0	0	0	0	0	0	0	0	0	0
Cronobacter_sakazakii	TBD	p505108-MDR	attI1;_attI1_site_recomb	0	0	0	0	0	0	0	0	0	0	0	0	0	0	0	0	0	0	0	0	0	0	0	0	0	0	0	0	0	0	0	0	0	0	0	0	0	0	0	0	0	0	0	0	0	0
Cronobacter_sakazakii	TBD	p505108-MDR	blaDHA-1	0	0	0	0	0	0	0	0	0	0	0	0	0	0	0	0	0	0	0	0	0	0	0	0	0	0	0	0	0	0	0	0	0	0	0	0	0	0	0	0	0	0	0	0	0	0
Cronobacter_sakazakii	TBD	p505108-MDR	blaSHV-12	0	0	0	0	0	0	0	0	0	0	0	0	0	0	0	0	0	0	0	0	0	0	0	0	0	0	0	0	0	0	0	0	0	0	0	0	0	0	0	0	0	0	0	0	0	0
Cronobacter_sakazakii	TBD	p505108-MDR	blaTEM-1B	0	0	0	0	0	0	0	0	0	0	0	0	0	0	0	0	0	0	0	0	0	0	0	0	0	0	0	0	0	0	0	0	0	0	0	0	0	0	0	0	0	0	0	0	0	0
Cronobacter_sakazakii	TBD	p505108-MDR	catA2	0	0	0	0	0	0	0	0	0	0	0	0	0	0	0	0	0	0	0	0	0	0	0	0	0	0	0	0	0	0	0	0	0	0	0	0	0	0	0	0	0	0	0	0	0	0
Cronobacter_sakazakii	TBD	p505108-MDR	cinA	0	0	0	0	0	0	0	0	0	0	0	0	0	0	0	0	0	0	0	0	0	0	0	0	0	0	0	0	0	0	0	0	0	0	0	0	0	0	0	0	0	0	0	0	0	0
Cronobacter_sakazakii	TBD	p505108-MDR	copE	0	0	0	0	0	0	0	0	0	0	0	0	0	0	0	0	0	0	0	0	0	0	0	0	0	0	0	0	0	0	0	0	0	0	0	0	0	0	0	0	0	0	0	0	100	100
Cronobacter_sakazakii	TBD	p505108-MDR	cytochrome	0	0	0	0	0	0	0	0	0	0	0	0	0	0	0	0	0	0	0	0	0	0	0	0	0	0	0	0	0	0	0	0	0	0	0	0	0	0	0	0	0	0	0	0	0	0
Cronobacter_sakazakii	TBD	p505108-MDR	dam	0	0	0	0	0	0	0	0	0	0	0	0	0	0	0	0	0	0	0	0	0	0	0	0	0	0	0	0	0	0	0	0	0	0	0	0	0	0	0	0	0	0	0	0	0	0
Cronobacter_sakazakii	TBD	p505108-MDR	dcm	0	0	0	0	0	0	0	0	0	0	0	0	0	0	0	0	0	0	0	0	0	0	0	0	0	0	0	0	0	0	0	0	0	0	0	0	0	0	0	0	0	0	0	0	0	0
Cronobacter_sakazakii	TBD	p505108-MDR	deoR	0	0	0	0	0	0	0	0	0	0	0	0	0	0	0	0	0	0	0	0	0	0	0	0	0	0	0	0	0	0	0	0	0	0	0	0	0	0	0	0	0	0	0	0	0	0
Cronobacter_sakazakii	TBD	p505108-MDR	dfrA18	0	0	0	0	0	0	0	0	0	0	0	0	0	0	0	0	0	0	0	0	0	0	0	0	0	0	0	0	0	0	0	0	0	0	0	0	0	0	0	0	0	0	0	0	0	0
Cronobacter_sakazakii	TBD	p505108-MDR	dsbC	0	0	0	0	0	0	0	0	0	0	0	0	0	0	0	0	0	0	0	0	0	0	0	0	0	0	0	0	0	0	0	0	0	0	0	0	0	0	0	0	0	0	0	0	0	0
Cronobacter_sakazakii	TBD	p505108-MDR	dsbG	0	0	0	0	0	0	0	0	0	0	0	0	0	0	0	0	0	0	0	0	0	0	0	0	0	0	0	0	0	0	0	0	0	0	0	0	0	0	0	0	0	0	0	0	0	0
Cronobacter_sakazakii	TBD	p505108-MDR	ecm	0	0	0	0	0	0	0	0	0	0	0	0	0	0	0	0	0	0	0	0	0	0	0	0	0	0	0	0	0	0	0	0	0	0	0	0	0	0	100	0	0	0	0	0	0	0
Cronobacter_sakazakii	TBD	p505108-MDR	ecoRIIR	0	0	0	0	0	0	0	0	0	0	0	0	0	0	0	0	0	0	0	0	0	0	0	0	0	0	0	0	0	0	0	0	0	0	0	0	0	0	0	0	0	0	0	0	0	0
Cronobacter_sakazakii	TBD	p505108-MDR	fieF	0	0	0	0	0	0	0	0	0	0	0	0	0	0	0	0	0	0	0	0	0	0	0	0	0	0	0	0	0	0	0	0	0	0	0	0	0	0	0	0	0	0	0	0	0	0
Cronobacter_sakazakii	TBD	p505108-MDR	flavin_reductase	0	0	0	0	0	0	0	0	0	0	0	0	0	0	0	0	0	0	0	0	0	0	0	0	0	0	0	0	0	0	0	0	0	0	0	0	0	0	0	0	0	0	0	0	0	0
Cronobacter_sakazakii	TBD	p505108-MDR	hha	0	0	0	0	0	0	0	0	0	0	0	0	0	0	0	0	0	0	0	0	0	0	0	0	0	0	0	0	0	0	0	0	0	0	0	0	0	0	0	0	0	0	0	0	0	0
Cronobacter_sakazakii	TBD	p505108-MDR	higB	0	0	0	0	0	0	0	0	0	0	0	0	0	0	0	0	0	0	0	0	0	0	0	0	0	0	0	0	0	0	0	0	0	0	0	0	0	0	0	0	0	0	0	0	0	0
Cronobacter_sakazakii	TBD	p505108-MDR	hipA	0	0	0	0	0	0	0	0	0	0	0	0	0	0	0	0	0	0	0	0	0	0	0	0	0	0	0	0	0	0	0	0	0	0	0	0	0	0	0	0	0	0	0	0	0	0
Cronobacter_sakazakii	TBD	p505108-MDR	hipB	0	0	0	0	0	0	0	0	0	0	0	0	0	0	0	0	0	0	0	0	0	0	0	0	0	0	0	0	0	0	0	0	0	0	0	0	0	0	0	0	0	0	0	0	0	0
Cronobacter_sakazakii	TBD	p505108-MDR	hns	0	0	0	0	0	0	0	0	0	0	0	0	0	0	0	0	0	0	0	0	0	0	0	0	0	0	0	0	0	0	0	0	0	0	0	0	0	0	0	0	0	0	0	0	0	0
Cronobacter_sakazakii	TBD	p505108-MDR	hsdM	0	0	0	0	0	0	0	0	0	0	0	0	0	0	0	0	0	0	0	0	0	0	0	0	0	0	0	0	0	0	0	0	0	0	0	0	0	0	0	0	0	0	0	0	0	0
Cronobacter_sakazakii	TBD	p505108-MDR	htdA	0	0	0	0	0	0	0	0	0	0	0	0	0	0	0	0	0	0	0	0	0	0	0	0	0	0	0	0	0	0	0	0	0	0	0	0	0	0	0	0	0	0	0	0	0	0
Cronobacter_sakazakii	TBD	p505108-MDR	htdF	0	0	0	0	0	0	0	0	0	0	0	0	0	0	0	0	0	0	0	0	0	0	0	0	0	0	0	0	0	0	0	0	0	0	0	0	0	0	0	0	0	0	0	0	0	0
Cronobacter_sakazakii	TBD	p505108-MDR	htdK	0	0	0	0	0	0	0	0	0	0	0	0	0	0	0	0	0	0	0	0	0	0	0	0	0	0	0	0	0	0	0	0	0	0	0	0	0	0	0	0	0	0	0	0	0	0
Cronobacter_sakazakii	TBD	p505108-MDR	htdO	0	0	0	0	0	0	0	0	0	0	0	0	0	0	0	0	0	0	0	0	0	0	0	0	0	0	0	0	0	0	0	0	0	0	0	0	0	0	0	0	0	0	0	0	0	0
Cronobacter_sakazakii	TBD	p505108-MDR	htdT	0	0	0	0	0	0	0	0	0	0	0	0	0	0	0	0	0	0	0	0	0	0	0	0	0	0	0	0	0	0	0	0	0	0	0	0	0	0	0	0	0	0	0	0	0	0
Cronobacter_sakazakii	TBD	p505108-MDR	htdV	0	0	0	0	0	0	0	0	0	0	0	0	0	0	0	0	0	0	0	0	0	0	0	0	0	0	0	0	0	0	0	0	0	0	0	0	0	0	0	0	0	0	0	0	0	0
Cronobacter_sakazakii	TBD	p505108-MDR	insA	0	0	0	0	0	0	0	0	0	0	0	0	0	0	0	0	0	0	0	91.3	93.42	0	100	0	0	100	97.83	100	100	100	100	100	0	100	0	0	0	0	99.12	0	100	100	0	0	98.55	0
Cronobacter_sakazakii	TBD	p505108-MDR	insB	0	0	0	0	0	0	0	0	0	0	0	0	0	0	0	0	0	0	0	90.57	0	0	100	0	0	100	100	100	100	100	100	100	0	100	0	0	0	0	100	0	100	100	0	0	98.41	0
Cronobacter_sakazakii	TBD	p505108-MDR	int	0	0	0	0	0	0	0	0	0	0	0	0	0	0	0	0	0	0	0	0	0	0	0	0	0	0	0	0	0	0	0	0	0	0	0	0	0	0	0	0	0	0	0	0	0	0
Cronobacter_sakazakii	TBD	p505108-MDR	intI1	0	0	0	0	0	0	0	0	0	0	0	0	0	0	0	0	0	0	0	0	0	0	0	0	0	0	0	0	0	0	0	0	0	0	0	0	0	0	0	0	0	0	0	0	0	0
Cronobacter_sakazakii	TBD	p505108-MDR	istA	0	0	0	0	0	0	0	0	0	0	0	0	0	0	0	0	0	0	0	0	0	0	0	0	0	0	0	0	0	0	0	0	0	0	0	0	0	0	0	0	0	0	0	0	0	0
Cronobacter_sakazakii	TBD	p505108-MDR	istB	0	0	0	0	0	0	0	0	0	0	0	0	0	0	0	0	0	0	0	0	0	0	0	0	0	0	0	0	0	0	0	0	0	0	0	0	0	0	0	0	0	0	0	0	0	0
Cronobacter_sakazakii	TBD	p505108-MDR	kikA	0	0	0	0	0	0	0	0	0	0	0	0	0	0	0	0	0	0	0	0	0	0	0	0	0	0	0	0	0	0	0	0	0	0	0	0	0	0	0	0	0	0	0	0	0	0
Cronobacter_sakazakii	TBD	p505108-MDR	klaC	0	0	0	0	0	0	0	0	0	0	0	0	0	0	0	0	0	0	0	0	0	0	0	0	0	0	0	0	0	0	0	0	0	0	0	0	0	0	0	0	0	0	0	0	0	0
Cronobacter_sakazakii	TBD	p505108-MDR	korA	0	0	0	0	0	0	0	0	0	0	0	0	0	0	0	0	0	0	0	0	0	0	0	0	0	0	0	0	0	0	0	0	0	0	0	0	0	0	0	0	0	0	0	0	0	0
Cronobacter_sakazakii	TBD	p505108-MDR	korB	0	0	0	0	0	0	0	0	0	0	0	0	0	0	0	0	0	0	0	0	0	0	0	0	0	0	0	0	0	0	0	0	0	0	0	0	0	0	0	0	0	0	0	0	0	0
Cronobacter_sakazakii	TBD	p505108-MDR	ldrB	0	0	0	0	0	0	0	0	0	0	0	0	0	0	0	0	0	0	0	0	0	0	0	0	0	0	0	0	0	0	0	0	0	0	0	0	0	0	0	0	0	0	0	0	0	0
Cronobacter_sakazakii	TBD	p505108-MDR	lspA	0	0	0	0	0	0	0	0	0	0	0	0	0	0	0	0	0	0	0	0	0	0	0	0	0	0	0	0	0	0	0	0	0	0	0	0	0	0	0	0	0	0	0	0	0	0
Cronobacter_sakazakii	TBD	p505108-MDR	mannosyl-3-phosphoglycerate	0	0	0	0	0	0	0	0	0	0	0	0	0	0	0	0	0	0	0	0	0	0	0	0	0	0	0	0	0	0	0	0	0	0	0	0	0	0	0	0	0	0	0	0	0	0
Cronobacter_sakazakii	TBD	p505108-MDR	merA	0	0	0	0	0	0	0	0	0	0	0	0	0	0	0	0	0	0	0	0	0	0	0	0	0	0	0	0	0	0	0	0	0	0	0	0	0	0	0	0	0	0	0	0	0	0
Cronobacter_sakazakii	TBD	p505108-MDR	merC	0	0	0	0	0	0	0	0	0	0	0	0	0	0	0	0	0	0	0	0	0	0	0	0	0	0	0	0	0	0	0	0	0	0	0	0	0	0	0	0	0	0	0	0	0	0
Cronobacter_sakazakii	TBD	p505108-MDR	merD	0	0	0	0	0	0	0	0	0	0	0	0	0	0	0	0	0	0	0	0	0	0	0	0	0	0	0	0	0	0	0	0	0	0	0	0	0	0	0	0	0	0	0	0	0	0
Cronobacter_sakazakii	TBD	p505108-MDR	merE	0	0	0	0	0	0	0	0	0	0	0	0	0	0	0	0	0	0	0	0	0	0	0	0	0	0	0	0	0	0	0	0	0	0	0	0	0	0	0	0	0	0	0	0	0	0
Cronobacter_sakazakii	TBD	p505108-MDR	merP	0	0	0	0	0	0	0	0	0	0	0	0	0	0	0	0	0	0	0	0	0	0	0	0	0	0	0	0	0	0	0	0	0	0	0	0	0	0	0	0	0	0	0	0	0	0
Cronobacter_sakazakii	TBD	p505108-MDR	merR	0	0	0	0	0	0	0	0	0	0	0	0	0	0	0	0	0	0	0	0	0	0	0	0	0	0	0	0	0	0	0	0	0	0	0	0	0	0	0	0	0	0	0	0	0	0
Cronobacter_sakazakii	TBD	p505108-MDR	merT	0	0	0	0	0	0	0	0	0	0	0	0	0	0	0	0	0	0	0	0	0	0	0	0	0	0	0	0	0	0	0	0	0	0	0	0	0	0	0	0	0	0	0	0	0	0
Cronobacter_sakazakii	TBD	p505108-MDR	methyltransferase	0	0	0	0	0	0	0	0	0	0	0	0	0	0	0	0	0	0	0	0	0	0	0	0	0	0	0	0	0	0	0	0	0	0	0	0	0	0	0	0	0	0	0	0	0	0
Cronobacter_sakazakii	TBD	p505108-MDR	mrr	0	0	0	0	0	0	0	0	0	0	0	0	0	0	0	0	0	0	0	0	0	0	0	0	0	0	0	0	0	0	0	0	0	0	0	0	0	0	0	0	0	0	0	0	0	0
Cronobacter_sakazakii	TBD	p505108-MDR	mucB	0	0	0	0	0	0	0	0	0	0	0	0	0	0	0	0	0	0	0	0	0	0	0	0	0	0	0	0	0	0	0	0	0	0	0	0	0	0	0	0	0	0	0	0	0	0
Cronobacter_sakazakii	TBD	p505108-MDR	nuclear	0	0	0	0	0	0	0	0	0	0	0	0	0	0	0	0	0	0	0	0	0	0	0	0	0	0	0	0	0	0	0	0	0	0	0	0	0	0	0	0	0	0	0	0	0	0
Cronobacter_sakazakii	TBD	p505108-MDR	nuclease	0	0	0	0	0	0	0	0	0	0	0	0	0	0	0	0	0	0	0	0	0	0	0	0	0	0	0	0	0	0	0	0	0	0	0	0	0	0	0	0	0	0	0	0	0	0
Cronobacter_sakazakii	TBD	p505108-MDR	parA	0	0	0	0	0	0	0	0	0	0	0	0	0	0	0	0	0	0	0	0	0	0	0	0	0	0	0	0	0	0	0	0	0	0	0	0	0	0	0	0	0	0	0	0	0	0
Cronobacter_sakazakii	TBD	p505108-MDR	parB	0	0	0	0	0	0	0	0	0	0	0	0	0	0	0	0	0	0	0	0	0	0	0	0	0	0	0	0	0	0	0	0	0	0	0	0	0	0	0	0	0	0	0	0	0	0
Cronobacter_sakazakii	TBD	p505108-MDR	parM	0	0	0	0	0	0	0	0	0	0	0	0	0	0	0	0	0	0	0	0	0	0	0	0	0	0	0	0	0	0	0	0	0	0	0	0	0	0	0	0	0	0	0	0	0	0
Cronobacter_sakazakii	TBD	p505108-MDR	parR	0	0	0	0	0	0	0	0	0	0	0	0	0	0	0	0	0	0	0	0	0	0	0	0	0	0	0	0	0	0	0	0	0	0	0	0	0	0	0	0	0	0	0	0	0	0
Cronobacter_sakazakii	TBD	p505108-MDR	pbrR	0	0	0	0	0	0	0	0	0	0	0	0	0	0	0	0	0	0	0	0	0	0	0	0	0	0	0	0	0	0	0	0	0	0	0	0	0	0	0	0	0	0	0	0	0	0
Cronobacter_sakazakii	TBD	p505108-MDR	protein	0	0	0	0	0	0	0	0	0	0	0	0	0	0	0	0	0	0	0	0	0	0	0	0	0	0	0	0	0	0	0	0	0	0	0	0	0	0	0	0	0	0	0	0	0	0
Cronobacter_sakazakii	TBD	p505108-MDR	pspA	0	81.13	80.95	80.7	80.58	80.4	80.79	80.55	80.79	80.79	0	80.55	80.55	80.55	80.55	80.7	80.49	80.85	80.85	80.7	80.7	80.55	81.46	81.46	81.46	81.46	81.46	81.46	81.46	81.46	81.46	81.46	81.46	81.46	0	0	0	0	77.11	80.85	80.85	80.85	80.85	81	81	81.58
Cronobacter_sakazakii	TBD	p505108-MDR	pspC	0	0	0	0	0	0	0	0	0	0	0	0	0	0	0	0	0	0	0	0	0	0	0	0	0	0	0	0	0	0	0	0	0	0	0	0	0	0	0	0	0	0	0	0	0	0
Cronobacter_sakazakii	TBD	p505108-MDR	pspF	0	0	0	0	0	0	0	0	0	0	0	0	0	0	0	0	0	0	0	0	0	0	0	0	0	0	0	0	0	0	0	0	0	0	0	0	0	0	0	0	0	0	0	0	0	0
Cronobacter_sakazakii	TBD	p505108-MDR	qacED1	0	0	0	0	0	0	0	0	0	0	0	0	0	0	0	0	0	0	0	0	0	0	0	0	0	0	0	0	0	0	0	0	0	0	0	0	0	0	0	0	0	0	0	0	0	0
Cronobacter_sakazakii	TBD	p505108-MDR	qnrB4	0	0	0	0	0	0	0	0	0	0	0	0	0	0	0	0	0	0	0	0	0	0	0	0	0	0	0	0	0	0	0	0	0	0	0	0	0	0	0	0	0	0	0	0	0	0
Cronobacter_sakazakii	TBD	p505108-MDR	rcnA	0	0	0	0	0	0	0	0	0	0	0	0	0	0	0	0	0	0	0	0	0	0	0	0	0	0	0	0	0	0	0	0	0	0	0	0	0	0	0	0	0	0	0	0	0	0
Cronobacter_sakazakii	TBD	p505108-MDR	rcnR	0	0	0	0	0	0	0	0	0	0	0	0	0	0	0	0	0	0	0	0	0	0	0	0	0	0	0	0	0	0	0	0	0	0	0	0	0	0	0	0	0	0	0	0	0	0
Cronobacter_sakazakii	TBD	p505108-MDR	relB	0	0	0	0	0	0	0	0	0	0	0	0	0	0	0	0	0	0	0	0	0	0	0	0	0	0	0	0	0	0	0	0	0	0	0	0	0	0	0	0	0	0	0	0	0	0
Cronobacter_sakazakii	TBD	p505108-MDR	relE	0	0	0	0	0	0	0	0	0	0	0	0	0	0	0	0	0	0	0	0	0	0	0	0	0	0	0	0	0	0	0	0	0	0	0	0	0	0	0	0	0	0	0	0	0	0
Cronobacter_sakazakii	TBD	p505108-MDR	repHI2A	0	0	0	0	0	0	0	0	0	0	0	0	0	0	0	0	0	0	0	0	0	0	0	0	0	0	0	0	0	0	0	0	0	0	0	0	0	0	0	0	0	0	0	0	0	0
Cronobacter_sakazakii	TBD	p505108-MDR	repHI2C	0	0	0	0	0	0	0	0	0	0	0	0	0	0	0	0	0	0	0	0	0	0	0	0	0	0	0	0	0	0	0	0	0	0	0	0	0	0	0	0	0	0	0	0	0	0
Cronobacter_sakazakii	TBD	p505108-MDR	resD	0	0	0	0	0	0	0	0	0	0	0	0	0	0	0	0	0	0	0	0	0	0	0	0	0	0	0	0	0	0	0	0	0	0	0	0	0	0	0	0	0	0	0	0	0	0
Cronobacter_sakazakii	TBD	p505108-MDR	sapA	0	0	75.83	75.7	75.9	75.9	75.7	75.64	75.7	75.7	0	75.77	75.77	75.77	75.9	75.64	75.97	75.77	75.77	75.83	75.83	75.9	75.95	75.95	75.95	75.95	75.95	75.95	75.95	75.95	75.95	75.95	75.95	75.95	0	0	0	0	81.33	76.13	76.13	76.13	76.13	75.95	76.19	0
Cronobacter_sakazakii	TBD	p505108-MDR	sapB	0	78.08	77.11	77.22	77.11	77.11	77.5	76.8	77.5	77.5	0	77.22	77.22	77.22	77.22	77.11	77.22	77.01	77.01	77.22	77.22	77.11	78.31	78.31	78.31	78.31	78.31	78.31	78.31	78.31	78.31	78.31	78.31	78.31	0	0	0	0	78.31	77.81	77.81	77.81	77.81	78.2	77.81	78.31
Cronobacter_sakazakii	TBD	p505108-MDR	sfpA	0	0	0	0	0	0	0	0	0	0	0	0	0	0	0	0	0	0	0	0	0	0	0	0	0	0	0	0	0	0	0	0	0	0	0	0	0	0	0	0	0	0	0	0	0	78.68
Cronobacter_sakazakii	TBD	p505108-MDR	sfpB	0	0	0	0	0	0	0	0	0	0	0	0	0	0	0	0	0	0	0	0	0	0	0	0	0	0	0	0	0	0	0	0	0	0	0	0	0	0	0	0	0	0	0	0	0	0
Cronobacter_sakazakii	TBD	p505108-MDR	sppA	0	0	0	0	0	0	0	0	0	0	0	0	0	0	0	0	0	0	0	0	0	0	0	0	0	0	0	0	0	0	0	0	0	0	0	0	0	0	0	0	0	0	0	0	0	0
Cronobacter_sakazakii	TBD	p505108-MDR	strA	0	0	0	0	0	0	0	0	0	0	0	0	0	0	0	0	0	0	0	0	0	0	0	0	0	0	0	0	0	0	0	0	0	0	0	0	0	0	0	0	0	0	0	0	0	0
Cronobacter_sakazakii	TBD	p505108-MDR	strB	0	0	0	0	0	0	0	0	0	0	0	0	0	0	0	0	0	0	0	0	0	0	0	0	0	0	0	0	0	0	0	0	0	0	0	0	0	0	0	0	0	0	0	0	0	0
Cronobacter_sakazakii	TBD	p505108-MDR	sul1	0	0	0	0	0	0	0	0	0	0	0	0	0	0	0	0	0	0	0	0	0	0	0	0	0	0	0	0	0	0	0	0	0	0	0	0	0	0	0	0	0	0	0	0	0	0
Cronobacter_sakazakii	TBD	p505108-MDR	ter	0	0	0	0	0	0	0	0	0	0	0	0	0	0	0	0	0	0	0	0	0	0	0	0	0	0	0	0	0	0	0	0	0	0	0	0	0	0	0	0	0	0	0	0	0	0
Cronobacter_sakazakii	TBD	p505108-MDR	terA	0	0	0	0	0	0	0	0	0	0	0	0	0	0	0	0	0	0	0	0	0	0	0	0	0	0	0	0	0	0	0	0	0	0	0	0	0	0	0	0	0	0	0	0	0	0
Cronobacter_sakazakii	TBD	p505108-MDR	terB	0	0	0	0	0	0	0	0	0	0	0	0	0	0	0	0	0	0	0	0	0	0	0	0	0	0	0	0	0	0	0	0	0	0	0	0	0	0	0	0	0	0	0	0	0	0
Cronobacter_sakazakii	TBD	p505108-MDR	terC	0	0	0	0	0	0	0	0	0	0	0	0	0	0	0	0	0	0	0	0	0	0	0	0	0	0	0	0	0	0	0	0	0	0	0	0	0	0	0	0	0	0	0	0	0	0
Cronobacter_sakazakii	TBD	p505108-MDR	terD	0	0	0	0	0	0	0	0	0	0	0	0	0	0	0	0	0	0	0	0	0	0	0	0	0	0	0	0	0	0	0	0	0	0	0	0	0	0	0	0	0	0	0	0	0	0
Cronobacter_sakazakii	TBD	p505108-MDR	terE	0	0	0	0	0	0	0	0	0	0	0	0	0	0	0	0	0	0	0	0	0	0	0	0	0	0	0	0	0	0	0	0	0	0	0	0	0	0	0	0	0	0	0	0	0	0
Cronobacter_sakazakii	TBD	p505108-MDR	terF	0	0	0	0	0	0	0	0	0	0	0	0	0	0	0	0	0	0	0	0	0	0	0	0	0	0	0	0	0	0	0	0	0	0	0	0	0	0	0	0	0	0	0	0	0	0
Cronobacter_sakazakii	TBD	p505108-MDR	terW	0	0	0	0	0	0	0	0	0	0	0	0	0	0	0	0	0	0	0	0	0	0	0	0	0	0	0	0	0	0	0	0	0	0	0	0	0	0	0	0	0	0	0	0	0	0
Cronobacter_sakazakii	TBD	p505108-MDR	terX	0	0	0	0	0	0	0	0	0	0	0	0	0	0	0	0	0	0	0	0	0	0	0	0	0	0	0	0	0	0	0	0	0	0	0	0	0	0	0	0	0	0	0	0	0	0
Cronobacter_sakazakii	TBD	p505108-MDR	terY1	0	0	0	0	0	0	0	0	0	0	0	0	0	0	0	0	0	0	0	0	0	0	0	0	0	0	0	0	0	0	0	0	0	0	0	0	0	0	0	0	0	0	0	0	0	0
Cronobacter_sakazakii	TBD	p505108-MDR	terY2	0	0	0	0	0	0	0	0	0	0	0	0	0	0	0	0	0	0	0	0	0	0	0	0	0	0	0	0	0	0	0	0	0	0	0	0	0	0	0	0	0	0	0	0	0	0
Cronobacter_sakazakii	TBD	p505108-MDR	terY3	0	0	0	0	0	0	0	0	0	0	0	0	0	0	0	0	0	0	0	0	0	0	0	0	0	0	0	0	0	0	0	0	0	0	0	0	0	0	0	0	0	0	0	0	0	0
Cronobacter_sakazakii	TBD	p505108-MDR	terZ	0	0	0	0	0	0	0	0	0	0	0	0	0	0	0	0	0	0	0	0	0	0	0	0	0	0	0	0	0	0	0	0	0	0	0	0	0	0	0	0	0	0	0	0	0	0
Cronobacter_sakazakii	TBD	p505108-MDR	tetA(D)	0	0	0	0	0	0	0	0	0	0	0	0	0	0	0	0	0	0	0	0	0	0	0	0	0	0	0	0	0	0	0	0	0	0	0	0	0	0	0	0	0	0	0	0	0	0
Cronobacter_sakazakii	TBD	p505108-MDR	tetR(D)	0	0	0	0	0	0	0	0	0	0	0	0	0	0	0	0	0	0	0	0	0	0	0	0	0	0	0	0	0	0	0	0	0	0	0	0	0	0	0	0	0	0	0	0	0	0
Cronobacter_sakazakii	TBD	p505108-MDR	tnpA	0	0	0	0	0	0	0	0	0	0	0	0	0	0	0	0	0	0	0	0	0	0	0	0	0	0	0	0	0	0	0	0	0	0	0	0	0	0	0	0	98.45	98.45	0	0	100	0
Cronobacter_sakazakii	TBD	p505108-MDR	tnpR	0	0	0	0	0	0	0	0	0	0	0	0	0	0	0	0	0	0	0	0	0	0	0	0	0	0	0	0	0	0	0	0	0	0	0	0	0	0	0	0	0	0	0	0	0	0
Cronobacter_sakazakii	TBD	p505108-MDR	traG	0	0	0	0	0	0	0	0	0	0	0	0	0	0	0	0	0	0	0	0	0	0	0	0	0	0	0	0	0	0	0	0	0	0	0	0	0	0	0	0	0	0	0	0	0	0
Cronobacter_sakazakii	TBD	p505108-MDR	traH	0	0	0	0	0	0	0	0	0	0	0	0	0	0	0	0	0	0	0	0	0	0	0	0	0	0	0	0	0	0	0	0	0	0	0	0	0	0	0	0	0	0	0	0	0	0
Cronobacter_sakazakii	TBD	p505108-MDR	traI	0	0	0	0	0	0	0	0	0	0	0	0	0	0	0	0	0	0	0	0	0	0	0	0	0	0	0	0	0	0	0	0	0	0	0	0	0	0	0	0	0	0	0	0	0	0
Cronobacter_sakazakii	TBD	p505108-MDR	traJ	0	0	0	0	0	0	0	0	0	0	0	0	0	0	0	0	0	0	0	0	0	0	0	0	0	0	0	0	0	0	0	0	0	0	0	0	0	0	0	0	0	0	0	0	0	0
Cronobacter_sakazakii	TBD	p505108-MDR	traL	0	0	0	0	0	0	0	0	0	0	0	0	0	0	0	0	0	0	0	0	0	0	0	0	0	0	0	0	0	0	0	0	0	0	0	0	0	0	0	0	0	0	0	0	0	0
Cronobacter_sakazakii	TBD	p505108-MDR	traN	0	0	0	0	0	0	0	0	0	0	0	0	0	0	0	0	0	0	0	0	0	0	0	0	0	0	0	0	0	0	0	0	0	0	0	0	0	0	0	0	0	0	0	0	0	0
Cronobacter_sakazakii	TBD	p505108-MDR	traU	0	0	0	0	0	0	0	0	0	0	0	0	0	0	0	0	0	0	0	0	0	0	0	0	0	0	0	0	0	0	0	0	0	0	0	0	0	0	0	0	0	0	0	0	0	0
Cronobacter_sakazakii	TBD	p505108-MDR	traW	0	0	0	0	0	0	0	0	0	0	0	0	0	0	0	0	0	0	0	0	0	0	0	0	0	0	0	0	0	0	0	0	0	0	0	0	0	0	0	0	0	0	0	0	0	0
Cronobacter_sakazakii	TBD	p505108-MDR	trhA	0	0	0	0	0	0	0	0	0	0	0	0	0	0	0	0	0	0	0	0	0	0	0	0	0	0	0	0	0	0	0	0	0	0	0	0	0	0	0	0	0	0	0	0	0	0
Cronobacter_sakazakii	TBD	p505108-MDR	trhB	0	0	0	0	0	0	0	0	0	0	0	0	0	0	0	0	0	0	0	0	0	0	0	0	0	0	0	0	0	0	0	0	0	0	0	0	0	0	0	0	0	0	0	0	0	0
Cronobacter_sakazakii	TBD	p505108-MDR	trhC	0	0	0	0	0	0	0	0	0	0	0	0	0	0	0	0	0	0	0	0	0	0	0	0	0	0	0	0	0	0	0	0	0	0	0	0	0	0	0	0	0	0	0	0	0	0
Cronobacter_sakazakii	TBD	p505108-MDR	trhE	0	0	0	0	0	0	0	0	0	0	0	0	0	0	0	0	0	0	0	0	0	0	0	0	0	0	0	0	0	0	0	0	0	0	0	0	0	0	0	0	0	0	0	0	0	0
Cronobacter_sakazakii	TBD	p505108-MDR	trhF	0	0	0	0	0	0	0	0	0	0	0	0	0	0	0	0	0	0	0	0	0	0	0	0	0	0	0	0	0	0	0	0	0	0	0	0	0	0	0	0	0	0	0	0	0	0
Cronobacter_sakazakii	TBD	p505108-MDR	trhG	0	0	0	0	0	0	0	0	0	0	0	0	0	0	0	0	0	0	0	0	0	0	0	0	0	0	0	0	0	0	0	0	0	0	0	0	0	0	0	0	0	0	0	0	0	0
Cronobacter_sakazakii	TBD	p505108-MDR	trhH	0	0	0	0	0	0	0	0	0	0	0	0	0	0	0	0	0	0	0	0	0	0	0	0	0	0	0	0	0	0	0	0	0	0	0	0	0	0	0	0	0	0	0	0	0	0
Cronobacter_sakazakii	TBD	p505108-MDR	trhK	0	0	0	0	0	0	0	0	0	0	0	0	0	0	0	0	0	0	0	0	0	0	0	0	0	0	0	0	0	0	0	0	0	0	0	0	0	0	0	0	0	0	0	0	0	0
Cronobacter_sakazakii	TBD	p505108-MDR	trhL	0	0	0	0	0	0	0	0	0	0	0	0	0	0	0	0	0	0	0	0	0	0	0	0	0	0	0	0	0	0	0	0	0	0	0	0	0	0	0	0	0	0	0	0	0	0
Cronobacter_sakazakii	TBD	p505108-MDR	trhO	0	0	0	0	0	0	0	0	0	0	0	0	0	0	0	0	0	0	0	0	0	0	0	0	0	0	0	0	0	0	0	0	0	0	0	0	0	0	0	0	0	0	0	0	0	0
Cronobacter_sakazakii	TBD	p505108-MDR	trhP	0	0	0	0	0	0	0	0	0	0	0	0	0	0	0	0	0	0	0	0	0	0	0	0	0	0	0	0	0	0	0	0	0	0	0	0	0	0	0	0	0	0	0	0	0	0
Cronobacter_sakazakii	TBD	p505108-MDR	trhR	0	0	0	0	0	0	0	0	0	0	0	0	0	0	0	0	0	0	0	0	0	0	0	0	0	0	0	0	0	0	0	0	0	0	0	0	0	0	0	0	0	0	0	0	0	0
Cronobacter_sakazakii	TBD	p505108-MDR	trhV	0	0	0	0	0	0	0	0	0	0	0	0	0	0	0	0	0	0	0	0	0	0	0	0	0	0	0	0	0	0	0	0	0	0	0	0	0	0	0	0	0	0	0	0	0	0
Cronobacter_sakazakii	TBD	p505108-MDR	trhY	0	0	0	0	0	0	0	0	0	0	0	0	0	0	0	0	0	0	0	0	0	0	0	0	0	0	0	0	0	0	0	0	0	0	0	0	0	0	0	0	0	0	0	0	0	0
Cronobacter_sakazakii	TBD	p505108-MDR	trhZ	0	0	0	0	0	0	0	0	0	0	0	0	0	0	0	0	0	0	0	0	0	0	0	0	0	0	0	0	0	0	0	0	0	0	0	0	0	0	0	0	0	0	0	0	0	0
Cronobacter_sakazakii	TBD	p505108-MDR	trypsin-like	0	0	0	0	0	0	0	0	0	0	0	0	0	0	0	0	0	0	0	0	0	0	0	0	0	0	0	0	0	0	0	0	0	0	0	0	0	0	0	0	0	0	0	0	0	0
Cronobacter_sakazakii	TBD	p505108-MDR	urf2Y	0	0	0	0	0	0	0	0	0	0	0	0	0	0	0	0	0	0	0	0	0	0	0	0	0	0	0	0	0	0	0	0	0	0	0	0	0	0	0	0	0	0	0	0	0	0
Cronobacter_sakazakii	TBD	p505108-MDR	uvrD1	0	0	0	0	0	0	0	0	0	0	0	0	0	0	0	0	0	0	0	0	0	0	0	0	0	0	0	0	0	0	0	0	0	0	0	0	0	0	0	0	0	0	0	0	0	0
Cronobacter_sakazakii	TBD	p505108-MDR	uvrD2	0	0	0	0	0	0	0	0	0	0	0	0	0	0	0	0	0	0	0	0	0	0	0	0	0	0	0	0	0	0	0	0	0	0	0	0	0	0	0	0	0	0	0	0	0	0
Cronobacter_sakazakii	TBD	p505108-MDR	wbuC	0	0	0	0	0	0	0	0	0	0	0	0	0	0	0	0	0	0	0	0	0	0	0	0	0	0	0	0	0	0	0	0	0	0	0	0	0	0	0	0	0	0	0	0	0	0
Cronobacter_sakazakii	TBD	p505108-MDR	ycaP	0	0	0	0	0	0	0	0	0	0	0	0	0	0	0	0	0	0	0	0	0	0	0	0	0	0	0	0	0	0	0	0	0	0	0	0	0	0	0	0	0	0	0	0	0	0
Cronobacter_sakazakii	TBD	p505108-MDR	ygbJ	0	0	0	0	0	0	0	0	0	0	0	0	0	0	0	0	0	0	0	0	0	0	0	0	0	0	0	0	0	0	0	0	0	0	0	0	0	0	0	0	0	0	0	0	0	0
Cronobacter_sakazakii	TBD	p505108-MDR	ygbK	0	0	0	0	0	0	0	0	0	0	0	0	0	0	0	0	0	0	0	0	0	0	0	0	0	0	0	0	0	0	0	0	0	0	0	0	0	0	0	0	0	0	0	0	0	0
Cronobacter_sakazakii	TBD	p505108-MDR	yjbL	0	0	0	0	0	0	0	0	0	0	0	0	0	0	0	0	0	0	0	0	0	0	0	0	0	0	0	0	0	0	0	0	0	0	0	0	0	0	0	0	0	0	0	0	0	0
Cronobacter_sakazakii	TBD	p505108-MDR	yqhD	0	0	0	0	0	0	0	0	0	0	0	0	0	0	0	0	0	0	0	0	0	0	0	0	0	0	0	0	0	0	0	0	0	0	0	0	0	0	0	0	0	0	0	0	0	0
Cronobacter_sakazakii	TBD	p505108-MDR	zntA	0	0	0	0	0	0	0	0	0	0	0	0	0	0	0	0	0	0	0	0	0	0	0	0	0	0	0	0	0	0	0	0	0	0	0	0	0	0	0	0	0	0	0	0	0	0
Cronobacter_sakazakii	TBD	p505108-NDM	ATPase	0	0	0	0	0	0	0	0	0	0	0	0	0	0	0	0	0	0	0	0	0	0	0	0	0	0	0	0	0	0	0	0	0	0	0	0	0	0	0	0	0	0	0	0	0	0
Cronobacter_sakazakii	TBD	p505108-NDM	DNA_polymerase_V	0	0	0	0	0	0	0	0	0	0	0	0	0	0	0	0	0	0	0	0	0	0	0	0	0	0	0	0	0	0	0	0	0	0	0	0	0	0	0	0	0	0	0	0	0	0
Cronobacter_sakazakii	TBD	p505108-NDM	DnaJ-class_molecular_chaperone	0	0	0	0	0	0	0	0	0	0	0	0	0	0	0	0	0	0	0	0	0	0	0	0	0	0	0	0	0	0	0	0	0	0	0	0	0	0	0	0	0	0	0	0	0	0
Cronobacter_sakazakii	TBD	p505108-NDM	Hypothetical_protein_237	0	0	0	0	0	0	0	0	0	0	0	0	0	0	0	0	0	0	0	0	0	0	0	0	0	0	0	0	0	0	0	0	0	0	0	0	0	0	0	0	0	0	0	0	0	0
Cronobacter_sakazakii	TBD	p505108-NDM	Hypothetical_protein_255	0	0	0	0	0	0	0	0	0	0	0	0	0	0	0	0	0	0	0	0	0	0	0	0	0	0	0	0	0	0	0	0	0	0	0	0	0	0	0	0	0	0	0	0	0	0
Cronobacter_sakazakii	TBD	p505108-NDM	Hypothetical_protein_258	0	0	0	0	0	0	0	0	0	0	0	0	0	0	0	0	0	0	0	0	0	0	0	0	0	0	0	0	0	0	0	0	0	0	0	0	0	0	0	0	0	0	0	0	0	0
Cronobacter_sakazakii	TBD	p505108-NDM	Hypothetical_protein_276	0	0	0	0	0	0	0	0	0	0	0	0	0	0	0	0	0	0	0	0	0	0	0	0	0	0	0	0	0	0	0	0	0	0	0	0	0	0	0	0	0	0	0	0	0	0
Cronobacter_sakazakii	TBD	p505108-NDM	Hypothetical_protein_279	0	0	0	0	0	0	0	0	0	0	0	0	0	0	0	0	0	0	0	0	0	0	0	0	0	0	0	0	0	0	0	0	0	0	0	0	0	0	0	0	0	0	0	0	0	0
Cronobacter_sakazakii	TBD	p505108-NDM	Hypothetical_protein_282	0	0	0	0	0	0	0	0	0	0	0	0	0	0	0	0	0	0	0	0	0	0	0	0	0	0	0	0	0	0	0	0	0	0	0	0	0	0	0	0	0	0	0	0	0	0
Cronobacter_sakazakii	TBD	p505108-NDM	Hypothetical_protein_312	0	0	0	0	0	0	0	0	0	0	0	0	0	0	0	0	0	0	0	0	0	0	0	0	0	0	0	0	0	0	0	0	0	0	0	0	0	0	0	0	0	0	0	0	0	0
Cronobacter_sakazakii	TBD	p505108-NDM	Hypothetical_protein_339	0	0	0	0	0	0	0	0	0	0	0	0	0	0	0	0	0	0	0	0	0	0	0	0	0	0	0	0	0	0	0	0	0	0	0	0	0	0	0	0	0	0	0	0	0	0
Cronobacter_sakazakii	TBD	p505108-NDM	Hypothetical_protein_390	0	0	0	0	0	0	0	0	0	0	0	0	0	0	0	0	0	0	0	0	0	0	0	0	0	0	0	0	0	0	0	0	0	0	0	0	0	0	0	0	0	0	0	0	0	0
Cronobacter_sakazakii	TBD	p505108-NDM	Hypothetical_protein_552	0	0	0	0	0	0	0	0	0	0	0	0	0	0	0	0	0	0	0	0	0	0	0	0	0	0	0	0	0	0	0	0	0	0	0	0	0	0	0	0	0	0	0	0	0	0
Cronobacter_sakazakii	TBD	p505108-NDM	Hypothetical_protein_651	0	0	0	0	0	0	0	0	0	0	0	0	0	0	0	0	0	0	0	0	0	0	0	0	0	0	0	0	0	0	0	0	0	0	0	0	0	0	0	0	0	0	0	0	0	0
Cronobacter_sakazakii	TBD	p505108-NDM	IRL_Tn3;_Tn3_inverted_repeat_left_repeat_region	0	0	0	0	0	0	0	0	0	0	0	0	0	0	0	0	0	0	0	0	0	0	0	0	0	0	0	0	0	0	0	0	0	0	0	0	0	0	0	0	0	0	0	0	0	0
Cronobacter_sakazakii	TBD	p505108-NDM	IS26_mobile_element	0	0	0	0	0	0	0	0	0	0	0	0	0	0	0	0	0	0	0	0	0	0	0	0	0	0	0	0	0	0	0	0	0	0	0	0	0	0	0	0	0	0	0	0	0	0
Cronobacter_sakazakii	TBD	p505108-NDM	IS3000_mobile_element	0	0	0	0	0	0	0	0	0	0	0	0	0	0	0	0	0	0	0	0	0	0	0	0	0	0	0	0	0	0	0	0	0	0	0	0	0	0	0	0	0	0	0	0	0	0
Cronobacter_sakazakii	TBD	p505108-NDM	ISAba125_mobile_element	0	0	0	0	0	0	0	0	0	0	0	0	0	0	0	0	0	0	0	0	0	0	0	0	0	0	0	0	0	0	0	0	0	0	0	0	0	0	0	0	0	0	0	0	0	0
Cronobacter_sakazakii	TBD	p505108-NDM	ISCR27_mobile_element	0	0	0	0	0	0	0	0	0	0	0	0	0	0	0	0	0	0	0	0	0	0	0	0	0	0	0	0	0	0	0	0	0	0	0	0	0	0	0	0	0	0	0	0	0	0
Cronobacter_sakazakii	TBD	p505108-NDM	ISKox3_mobile_element	0	0	0	0	0	0	0	0	0	0	0	0	0	0	0	0	0	0	0	0	0	0	0	0	0	0	0	0	0	0	0	0	0	0	0	0	0	0	0	0	0	0	0	0	0	0
Cronobacter_sakazakii	TBD	p505108-NDM	Resolvase	0	0	0	0	0	0	0	0	0	0	0	0	0	0	0	0	0	0	0	0	0	0	0	0	0	0	0	0	0	0	0	0	0	0	0	0	0	0	0	0	0	0	0	0	0	0
Cronobacter_sakazakii	TBD	p505108-NDM	Tn125_mobile_element	0	76.46	77.45	77.57	77.57	77.65	82.26	77.5	77.61	77.61	0	77.57	77.57	77.57	77.57	77.32	77.51	77.57	77.57	77.88	77.88	77.65	77.56	77.56	77.56	77.56	77.56	77.56	77.56	77.56	77.56	77.56	77.56	77.56	0	0	0	0	77.12	77.62	77.62	77.62	77.62	77.37	77.31	77.69
Cronobacter_sakazakii	TBD	p505108-NDM	Tn3_mobile_element	0	0	0	0	0	0	0	0	0	0	0	0	0	0	0	0	0	0	0	0	0	0	0	0	0	0	0	0	0	0	0	0	0	0	0	0	0	0	0	0	0	0	0	0	0	0
Cronobacter_sakazakii	TBD	p505108-NDM	VirB/Tra/Trw_family_protein	0	0	0	0	0	0	0	0	0	0	0	0	0	0	0	0	0	0	0	0	0	0	0	0	0	0	0	0	0	0	0	0	0	0	0	0	0	0	0	0	0	0	0	0	0	0
Cronobacter_sakazakii	TBD	p505108-NDM	actX	0	0	0	0	0	0	0	0	0	0	0	0	0	0	0	0	0	0	0	0	0	0	0	0	0	0	0	0	0	0	0	0	0	0	0	0	0	0	0	0	0	0	0	0	0	0
Cronobacter_sakazakii	TBD	p505108-NDM	blaNDM-1	0	0	0	0	0	0	0	0	0	0	0	0	0	0	0	0	0	0	0	0	0	0	0	0	0	0	0	0	0	0	0	0	0	0	0	0	0	0	0	0	0	0	0	0	0	0
Cronobacter_sakazakii	TBD	p505108-NDM	blaSHV-12	0	0	0	0	0	0	0	0	0	0	0	0	0	0	0	0	0	0	0	0	0	0	0	0	0	0	0	0	0	0	0	0	0	0	0	0	0	0	0	0	0	0	0	0	0	0
Cronobacter_sakazakii	TBD	p505108-NDM	bleMBL	0	0	0	0	0	0	0	0	0	0	0	0	0	0	0	0	0	0	0	0	0	0	0	0	0	0	0	0	0	0	0	0	0	0	0	0	0	0	0	0	0	0	0	0	0	0
Cronobacter_sakazakii	TBD	p505108-NDM	cutA	0	0	0	0	0	0	0	0	0	0	0	0	0	0	0	0	0	0	0	0	0	0	0	0	0	0	0	0	0	0	0	0	0	0	0	0	0	0	0	0	0	0	0	0	0	0
Cronobacter_sakazakii	TBD	p505108-NDM	deoR	0	0	0	0	0	0	0	0	0	0	0	0	0	0	0	0	0	0	0	0	0	0	0	0	0	0	0	0	0	0	0	0	0	0	0	0	0	0	0	0	0	0	0	0	0	0
Cronobacter_sakazakii	TBD	p505108-NDM	dsbD	0	0	0	0	0	0	0	0	0	0	0	0	0	0	0	0	0	0	0	0	0	0	0	0	0	0	0	0	0	0	0	0	0	0	0	0	0	0	0	0	0	0	0	0	0	0
Cronobacter_sakazakii	TBD	p505108-NDM	groEL	0	76.46	77.45	77.57	77.57	77.65	82.26	77.5	77.61	77.61	0	77.57	77.57	77.57	77.57	77.32	77.51	77.57	77.57	77.88	77.88	77.65	77.56	77.56	77.56	77.56	77.56	77.56	77.56	77.56	77.56	77.56	77.56	77.56	0	0	0	0	77.12	77.62	77.62	77.62	77.62	77.37	77.31	77.69
Cronobacter_sakazakii	TBD	p505108-NDM	groS	0	0	0	0	0	0	0	0	0	0	0	0	0	0	0	0	0	0	0	0	0	0	0	0	0	0	0	0	0	0	0	0	0	0	0	0	0	0	0	0	0	0	0	0	0	0
Cronobacter_sakazakii	TBD	p505108-NDM	hypothetical_protein_444	0	0	0	0	0	0	0	0	0	0	0	0	0	0	0	0	0	0	0	0	0	0	0	0	0	0	0	0	0	0	0	0	0	0	0	0	0	0	0	0	0	0	0	0	0	0
Cronobacter_sakazakii	TBD	p505108-NDM	insE	0	0	0	0	0	0	0	0	0	0	0	0	0	0	0	0	0	0	0	0	0	0	0	0	0	0	0	0	0	0	0	0	0	0	0	0	0	0	0	0	0	0	0	0	0	0
Cronobacter_sakazakii	TBD	p505108-NDM	insH	0	0	0	0	0	0	0	0	0	0	0	0	0	0	0	0	0	0	0	0	0	0	0	0	0	0	0	0	0	0	0	0	0	0	0	0	0	0	0	0	0	0	0	0	0	0
Cronobacter_sakazakii	TBD	p505108-NDM	misc	0	0	0	0	0	0	0	0	0	0	0	0	0	0	0	0	0	0	0	0	0	0	0	0	0	0	0	0	0	0	0	0	0	0	0	0	0	0	0	0	0	0	0	0	0	0
Cronobacter_sakazakii	TBD	p505108-NDM	mpr	0	0	0	0	0	0	0	0	0	0	0	0	0	0	0	0	0	0	0	0	0	0	0	0	0	0	0	0	0	0	0	0	0	0	0	0	0	0	0	0	0	0	0	0	0	0
Cronobacter_sakazakii	TBD	p505108-NDM	parA	0	0	0	0	0	0	0	0	0	0	0	0	0	0	0	0	0	0	0	0	0	0	0	0	0	0	0	0	0	0	0	0	0	0	0	0	0	0	0	0	0	0	0	0	0	0
Cronobacter_sakazakii	TBD	p505108-NDM	pilX1	0	0	0	0	0	0	0	0	0	0	0	0	0	0	0	0	0	0	0	0	0	0	0	0	0	0	0	0	0	0	0	0	0	0	0	0	0	0	0	0	0	0	0	0	0	0
Cronobacter_sakazakii	TBD	p505108-NDM	pilX10	0	0	0	0	0	0	0	0	0	0	0	0	0	0	0	0	0	0	0	0	0	0	0	0	0	0	0	0	0	0	0	0	0	0	0	0	0	0	0	0	0	0	0	0	0	0
Cronobacter_sakazakii	TBD	p505108-NDM	pilX11	0	0	0	0	0	0	0	0	0	0	0	0	0	0	0	0	0	0	0	0	0	0	0	0	0	0	0	0	0	0	0	0	0	0	0	0	0	0	0	0	0	0	0	0	0	0
Cronobacter_sakazakii	TBD	p505108-NDM	pilX2	0	0	0	0	0	0	0	0	0	0	0	0	0	0	0	0	0	0	0	0	0	0	0	0	0	0	0	0	0	0	0	0	0	0	0	0	0	0	0	0	0	0	0	0	0	0
Cronobacter_sakazakii	TBD	p505108-NDM	pilX3	0	0	0	0	0	0	0	0	0	0	0	0	0	0	0	0	0	0	0	0	0	0	0	0	0	0	0	0	0	0	0	0	0	0	0	0	0	0	0	0	0	0	0	0	0	0
Cronobacter_sakazakii	TBD	p505108-NDM	pilX5	0	0	0	0	0	0	0	0	0	0	0	0	0	0	0	0	0	0	0	0	0	0	0	0	0	0	0	0	0	0	0	0	0	0	0	0	0	0	0	0	0	0	0	0	0	0
Cronobacter_sakazakii	TBD	p505108-NDM	pilX6	0	0	0	0	0	0	0	0	0	0	0	0	0	0	0	0	0	0	0	0	0	0	0	0	0	0	0	0	0	0	0	0	0	0	0	0	0	0	0	0	0	0	0	0	0	0
Cronobacter_sakazakii	TBD	p505108-NDM	pilX8	0	0	0	0	0	0	0	0	0	0	0	0	0	0	0	0	0	0	0	0	0	0	0	0	0	0	0	0	0	0	0	0	0	0	0	0	0	0	0	0	0	0	0	0	0	0
Cronobacter_sakazakii	TBD	p505108-NDM	pilX9	0	0	0	0	0	0	0	0	0	0	0	0	0	0	0	0	0	0	0	0	0	0	0	0	0	0	0	0	0	0	0	0	0	0	0	0	0	0	0	0	0	0	0	0	0	0
Cronobacter_sakazakii	TBD	p505108-NDM	repB	0	0	0	0	0	0	0	0	0	0	0	0	0	0	0	0	0	0	0	0	0	0	0	0	0	0	0	0	0	0	0	0	0	0	0	0	0	0	0	0	0	0	0	0	0	0
Cronobacter_sakazakii	TBD	p505108-NDM	repeat_region	0	0	0	0	0	0	0	0	0	0	0	0	0	0	0	0	0	0	0	0	0	0	0	0	0	0	0	0	0	0	0	0	0	0	0	0	0	0	0	0	0	0	0	0	0	0
Cronobacter_sakazakii	TBD	p505108-NDM	stpA	0	0	0	0	0	0	0	0	0	0	0	0	0	0	0	0	0	0	0	0	0	0	0	0	0	0	0	0	0	0	0	0	0	0	0	0	0	0	0	0	0	0	0	0	0	0
Cronobacter_sakazakii	TBD	p505108-NDM	taxA	0	0	0	0	0	0	0	0	0	0	0	0	0	0	0	0	0	0	0	0	0	0	0	0	0	0	0	0	0	0	0	0	0	0	0	0	0	0	0	0	0	0	0	0	0	0
Cronobacter_sakazakii	TBD	p505108-NDM	taxC	0	0	0	0	0	0	0	0	0	0	0	0	0	0	0	0	0	0	0	0	0	0	0	0	0	0	0	0	0	0	0	0	0	0	0	0	0	0	0	0	0	0	0	0	0	0
Cronobacter_sakazakii	TBD	p505108-NDM	taxD	0	0	0	0	0	0	0	0	0	0	0	0	0	0	0	0	0	0	0	0	0	0	0	0	0	0	0	0	0	0	0	0	0	0	0	0	0	0	0	0	0	0	0	0	0	0
Cronobacter_sakazakii	TBD	p505108-NDM	tnpA	0	0	0	0	0	0	0	0	0	0	0	0	0	0	0	0	0	0	0	0	0	0	0	0	0	0	0	0	0	0	0	0	0	0	0	0	0	0	0	0	0	0	0	0	0	0
Cronobacter_sakazakii	TBD	p505108-NDM	topB	0	0	0	0	0	0	0	0	0	0	0	0	0	0	0	0	0	0	0	0	0	0	0	0	0	0	0	0	0	0	0	0	0	0	0	0	0	0	0	0	0	0	0	0	0	0
Cronobacter_sakazakii	TBD	p505108-NDM	traG	0	0	0	0	0	0	0	0	0	0	0	0	0	0	0	0	0	0	0	0	0	0	0	0	0	0	0	0	0	0	0	0	0	0	0	0	0	0	0	0	0	0	0	0	0	0
Cronobacter_sakazakii	TBD	p505108-NDM	trbM	0	0	0	0	0	0	0	0	0	0	0	0	0	0	0	0	0	0	0	0	0	0	0	0	0	0	0	0	0	0	0	0	0	0	0	0	0	0	0	0	0	0	0	0	0	0
Cronobacter_sakazakii	TBD	p505108-NDM	trpF	0	0	0	0	0	0	0	0	0	0	0	0	0	0	0	0	0	0	0	0	0	0	0	0	0	0	0	0	0	0	0	0	0	0	0	0	0	0	0	0	0	0	0	0	0	0
Cronobacter_sakazakii	TBD	p505108-NDM	umuD	0	0	0	0	0	0	0	0	0	0	0	0	0	0	0	0	0	0	0	0	0	0	0	0	0	0	0	0	0	0	0	0	0	0	0	0	0	0	0	0	0	0	0	0	0	0
Cronobacter_sakazakii	TBD	p505108-NDM	yajA	0	0	0	0	0	0	0	0	0	0	0	0	0	0	0	0	0	0	0	0	0	0	0	0	0	0	0	0	0	0	0	0	0	0	0	0	0	0	0	0	0	0	0	0	0	0
Cronobacter_sakazakii	TBD	p505108-NDM	ygbJ	0	0	0	0	0	0	0	0	0	0	0	0	0	0	0	0	0	0	0	0	0	0	0	0	0	0	0	0	0	0	0	0	0	0	0	0	0	0	0	0	0	0	0	0	0	0
Cronobacter_sakazakii	TBD	p505108-NDM	yhcR	0	0	0	0	0	0	0	0	0	0	0	0	0	0	0	0	0	0	0	0	0	0	0	0	0	0	0	0	0	0	0	0	0	0	0	0	0	0	0	0	0	0	0	0	0	0
Cronobacter_sakazakii	TBD	p505108-T6SS	AAA	0	0	0	0	0	0	0	0	0	0	0	0	0	0	0	0	0	0	0	0	0	0	0	0	0	0	0	0	0	0	0	0	0	0	0	0	0	0	0	0	0	0	0	0	0	0
Cronobacter_sakazakii	TBD	p505108-T6SS	Amino_acid-binding_protein	0	0	0	0	0	0	0	0	0	0	0	0	0	0	0	0	0	0	0	0	0	0	0	0	0	0	0	0	0	0	0	0	0	0	0	0	0	0	0	0	0	0	0	0	0	0
Cronobacter_sakazakii	TBD	p505108-T6SS	Antibiotic_biosynthesis_monooxygenase	0	0	0	0	0	0	0	0	0	0	0	0	0	0	0	0	0	0	0	0	0	0	0	0	0	0	0	0	0	0	0	0	0	0	0	0	0	0	0	0	0	0	0	0	0	0
Cronobacter_sakazakii	TBD	p505108-T6SS	ArsR_family_transcriptional_regulator	0	0	0	0	0	0	0	0	0	0	0	0	0	0	0	0	0	0	0	0	0	0	0	0	0	0	0	0	0	0	0	0	0	0	0	0	0	0	0	0	0	0	0	0	0	0
Cronobacter_sakazakii	TBD	p505108-T6SS	Cellulose_synthase	0	0	0	0	0	0	0	0	0	0	0	0	0	0	0	0	0	0	0	0	0	0	0	0	0	0	0	0	0	0	0	0	0	0	0	0	0	0	0	0	0	0	0	0	0	0
Cronobacter_sakazakii	TBD	p505108-T6SS	CpmJ_protein	0	0	0	0	0	0	0	0	0	0	0	0	0	0	0	0	0	0	0	0	0	0	0	0	0	0	0	0	0	0	0	0	0	0	0	0	0	0	0	0	0	0	0	0	0	0
Cronobacter_sakazakii	TBD	p505108-T6SS	CpmK_protein	0	0	0	0	0	0	0	0	0	0	0	0	0	0	0	0	0	0	0	0	0	0	0	0	0	0	0	0	0	0	0	0	0	0	0	0	0	0	0	0	0	0	0	0	0	0
Cronobacter_sakazakii	TBD	p505108-T6SS	Darcynin	0	0	0	0	0	0	0	0	0	0	0	0	0	0	0	0	0	0	0	0	0	0	0	0	0	0	0	0	0	0	0	0	0	0	0	0	0	0	0	0	0	0	0	0	0	0
Cronobacter_sakazakii	TBD	p505108-T6SS	Diguanylate_cyclase	0	0	0	0	0	0	0	0	0	0	0	0	0	0	0	0	0	0	0	0	0	0	0	0	0	0	0	0	0	0	0	0	0	0	0	0	0	0	100	0	0	0	0	0	0	0
Cronobacter_sakazakii	TBD	p505108-T6SS	Diguanylate_phosphodiesterase	0	0	0	0	0	0	0	0	0	0	0	0	0	0	0	0	0	0	0	0	0	0	0	0	0	0	0	0	0	0	0	0	0	0	0	0	0	0	0	0	0	0	0	0	0	0
Cronobacter_sakazakii	TBD	p505108-T6SS	Exc2	0	0	0	0	0	0	0	0	0	0	0	0	0	0	0	0	0	0	0	0	0	0	0	0	0	0	0	0	0	0	0	0	0	0	0	0	0	0	0	0	0	0	0	0	0	0
Cronobacter_sakazakii	TBD	p505108-T6SS	Ferredoxin	0	0	0	0	0	0	0	0	0	0	0	0	0	0	0	0	0	0	0	0	0	0	0	0	0	0	0	0	0	0	0	0	0	0	0	0	0	0	0	0	0	0	0	0	0	0
Cronobacter_sakazakii	TBD	p505108-T6SS	Helicase_C-terminal	0	0	0	0	0	0	74.41	0	0	74.41	0	0	0	0	0	0	0	0	0	0	0	0	0	0	0	0	0	0	0	0	0	0	0	0	0	0	0	0	0	0	0	0	0	94.94	0	0
Cronobacter_sakazakii	TBD	p505108-T6SS	Histidine_phosphatase	0	0	0	0	0	0	0	0	0	0	0	0	0	0	0	0	0	0	0	0	0	0	0	0	0	0	0	0	0	0	0	0	0	0	0	0	0	0	0	0	0	0	0	0	0	92.2
Cronobacter_sakazakii	TBD	p505108-T6SS	Hypothetical_protein_1059	0	0	0	0	0	0	0	0	0	0	0	0	0	0	0	0	0	0	0	0	0	0	0	0	0	0	0	0	0	0	0	0	0	0	0	0	0	0	0	0	0	0	0	0	0	0
Cronobacter_sakazakii	TBD	p505108-T6SS	Hypothetical_protein_1224	0	0	0	0	0	0	0	0	0	0	0	0	0	0	0	0	0	0	0	0	0	0	0	0	0	0	0	0	0	0	0	0	0	0	0	0	0	0	0	0	0	0	0	93.8	0	0
Cronobacter_sakazakii	TBD	p505108-T6SS	Hypothetical_protein_168	0	0	0	0	0	0	0	0	0	0	0	0	0	0	0	0	0	0	0	0	0	0	0	0	0	0	0	0	0	0	0	0	0	95.83	0	0	0	0	0	0	0	0	0	96.43	0	0
Cronobacter_sakazakii	TBD	p505108-T6SS	Hypothetical_protein_246	0	0	0	78.86	0	79.67	0	0	0	0	79.27	79.27	79.27	0	0	80.08	0	0	0	0	0	79.67	91.5	91.5	91.5	91.5	91.5	91.5	91.5	91.5	91.5	91.5	91.5	91.5	92.34	92.34	0	0	91.09	91.46	91.06	91.06	91.46	91.5	91.09	91.5
Cronobacter_sakazakii	TBD	p505108-T6SS	Hypothetical_protein_270	0	0	0	0	0	0	0	0	0	0	0	0	0	0	0	0	0	0	0	0	0	0	0	0	0	0	0	0	0	0	0	0	0	0	0	0	0	0	0	0	0	0	0	0	0	0
Cronobacter_sakazakii	TBD	p505108-T6SS	Hypothetical_protein_300	0	0	0	0	0	0	0	0	0	0	0	0	0	0	0	0	0	0	0	0	0	0	0	0	0	0	0	0	0	0	0	0	0	0	0	0	0	0	0	0	0	0	0	0	0	0
Cronobacter_sakazakii	TBD	p505108-T6SS	Hypothetical_protein_312	0	0	0	0	0	0	0	0	0	0	0	0	0	0	0	0	0	0	0	0	0	0	0	0	0	0	0	0	0	0	0	0	0	0	0	0	0	0	0	0	0	0	0	0	0	0
Cronobacter_sakazakii	TBD	p505108-T6SS	Hypothetical_protein_372	0	0	0	0	0	0	0	0	0	0	0	0	0	0	0	0	0	0	0	0	0	0	0	0	0	0	0	0	0	0	0	0	0	0	0	0	0	0	0	0	0	0	0	0	0	0
Cronobacter_sakazakii	TBD	p505108-T6SS	Hypothetical_protein_390	0	0	0	0	0	0	0	0	0	0	0	0	0	0	0	0	0	0	0	0	0	0	0	0	0	0	0	0	0	0	0	0	0	0	0	0	0	0	0	0	0	0	0	0	0	0
Cronobacter_sakazakii	TBD	p505108-T6SS	Hypothetical_protein_624	0	0	0	0	0	0	0	0	0	0	0	0	0	0	0	0	0	0	0	0	0	0	0	0	0	0	0	0	0	0	0	0	0	0	0	0	0	0	0	0	0	0	0	0	0	0
Cronobacter_sakazakii	TBD	p505108-T6SS	Hypothetical_protein_648	0	0	0	0	0	0	0	0	0	0	0	0	0	0	0	0	0	0	0	0	0	0	0	0	0	0	0	0	0	0	0	0	0	0	0	0	0	0	0	0	0	0	0	0	0	0
Cronobacter_sakazakii	TBD	p505108-T6SS	Hypothetical_protein_816	0	0	0	0	0	0	0	0	0	0	0	0	0	0	0	0	0	0	0	0	0	0	0	0	0	0	0	0	0	0	0	0	0	0	0	0	0	0	0	0	0	0	0	0	0	0
Cronobacter_sakazakii	TBD	p505108-T6SS	Hypothetical_protein_825	0	0	0	0	0	0	0	0	0	0	0	0	0	0	0	0	0	0	0	0	0	0	0	0	0	0	0	0	0	0	0	0	0	0	0	0	0	0	0	0	0	0	0	0	0	0
Cronobacter_sakazakii	TBD	p505108-T6SS	Hypothetical_protein_939	0	0	0	0	0	0	0	0	0	0	0	0	0	0	0	0	0	0	0	0	0	0	0	0	0	0	0	0	0	0	0	0	0	0	0	0	0	0	0	0	0	0	0	0	0	0
Cronobacter_sakazakii	TBD	p505108-T6SS	LysR_family_transcriptional_regulator	0	0	0	0	0	0	0	0	0	0	0	0	0	0	0	0	0	0	0	0	0	0	0	0	0	0	0	0	0	0	0	0	0	0	0	0	0	0	0	0	0	0	0	0	0	0
Cronobacter_sakazakii	TBD	p505108-T6SS	MBL	0	0	0	0	0	0	0	0	0	0	0	0	0	0	0	0	0	0	0	0	0	0	0	0	0	0	0	0	0	0	0	0	0	0	0	0	0	0	0	0	0	0	0	0	0	0
Cronobacter_sakazakii	TBD	p505108-T6SS	MFS	0	0	0	0	0	0	0	0	0	0	0	0	0	0	0	0	0	0	0	0	0	0	0	0	0	0	0	0	0	0	0	0	0	0	0	0	0	0	0	0	0	0	0	0	0	0
Cronobacter_sakazakii	TBD	p505108-T6SS	Membrane_protein	0	0	0	0	0	0	0	0	0	0	0	0	0	0	0	0	0	0	0	0	0	0	0	0	0	0	0	0	0	0	0	0	0	0	0	0	0	0	0	0	0	0	0	0	0	0
Cronobacter_sakazakii	TBD	p505108-T6SS	Methyl-accepting_chemotaxis_protein_I	0	86.59	100	100	100	100	100	100	100	100	0	100	100	100	100	100	100	100	100	100	100	100	100	100	100	100	100	100	100	100	100	100	100	100	0	0	0	0	100	100	100	100	100	100	100	100
Cronobacter_sakazakii	TBD	p505108-T6SS	PAAR	0	0	0	0	0	0	0	0	0	0	0	0	0	0	0	0	0	0	0	0	0	0	0	0	0	0	0	0	0	0	0	0	0	0	0	0	0	0	0	0	0	0	0	0	0	0
Cronobacter_sakazakii	TBD	p505108-T6SS	Permease_of_the_drug/metabolite_transporter_(DMT)_superfamily	0	0	0	0	0	0	0	0	0	0	0	0	0	0	0	0	0	0	0	0	0	0	0	0	0	0	0	0	0	0	0	0	0	0	0	0	0	0	0	0	0	0	0	0	0	0
Cronobacter_sakazakii	TBD	p505108-T6SS	Phosphoglycerate_mutase	0	0	0	0	0	0	0	0	0	0	0	0	0	0	0	0	0	0	0	0	0	0	0	0	0	0	0	0	0	0	0	0	0	0	0	0	0	0	0	0	0	0	0	0	0	0
Cronobacter_sakazakii	TBD	p505108-T6SS	Prolyl_endopeptidase	0	0	0	0	0	0	0	0	0	0	0	0	0	0	0	0	0	0	0	0	0	0	0	0	0	0	0	0	0	0	0	0	0	0	0	0	0	0	0	0	0	0	0	0	0	0
Cronobacter_sakazakii	TBD	p505108-T6SS	Putative_acetyltransferase	0	0	0	0	0	0	0	0	0	0	0	0	0	0	0	0	0	0	0	0	0	0	91.09	91.09	91.09	91.09	91.09	91.09	91.09	91.09	91.09	91.09	91.09	91.09	0	0	0	0	0	0	0	0	0	91.62	0	91.82
Cronobacter_sakazakii	TBD	p505108-T6SS	SDR	0	0	0	0	0	0	0	0	0	0	0	0	0	0	0	0	0	0	0	0	0	0	0	0	0	0	0	0	0	0	0	0	0	0	0	0	0	0	0	0	0	0	0	0	0	0
Cronobacter_sakazakii	TBD	p505108-T6SS	SMI1/KNR4	0	0	0	0	0	0	0	0	0	0	0	0	0	0	0	0	0	0	0	0	0	0	0	0	0	0	0	0	0	0	0	0	0	0	0	0	0	0	0	0	0	0	0	0	0	0
Cronobacter_sakazakii	TBD	p505108-T6SS	TetR-family_transcriptional_regulator	0	0	0	0	0	0	87.29	0	0	0	0	0	0	0	0	0	0	0	0	0	0	0	100	100	100	100	100	100	100	100	100	100	100	100	0	0	0	0	100	100	100	100	100	94.55	94.69	89.17
Cronobacter_sakazakii	TBD	p505108-T6SS	Transcriptional_regulator	0	0	0	0	0	0	0	0	0	0	0	0	0	0	0	0	0	0	0	0	0	0	0	0	0	0	0	0	0	0	0	0	0	0	0	0	0	0	0	0	0	0	0	0	0	0
Cronobacter_sakazakii	TBD	p505108-T6SS	Transcriptional_regulator,_GntR_family	0	0	0	0	0	0	0	0	0	0	0	0	0	0	0	0	0	0	0	0	0	0	95.42	95.42	95.42	95.42	95.42	95.42	95.42	95.42	95.42	95.42	95.42	95.42	0	0	0	0	0	0	0	0	0	0	0	0
Cronobacter_sakazakii	TBD	p505108-T6SS	Two-component_response_regulator	0	0	0	0	0	0	0	0	0	0	0	0	0	0	0	0	0	0	0	0	0	0	98.12	98.12	98.12	98.12	98.12	98.12	98.12	98.12	98.12	98.12	98.12	98.12	0	0	0	0	97.84	0	0	0	0	98.12	98.12	98.12
Cronobacter_sakazakii	TBD	p505108-T6SS	Two-component_system_sensor_protein	0	0	0	0	0	0	0	0	0	0	0	0	0	0	0	0	0	0	0	0	0	0	98.3	98.3	98.3	98.3	98.3	98.3	98.3	98.3	98.3	98.3	98.3	98.3	98.39	98.39	0	0	98.3	0	0	0	0	98.3	99.12	98.3
Cronobacter_sakazakii	TBD	p505108-T6SS	acrA	0	0	0	0	0	0	0	0	0	0	0	0	0	0	0	0	0	0	0	0	0	0	0	0	0	0	0	0	0	0	0	0	0	0	0	0	0	0	97.57	0	0	0	0	0	0	0
Cronobacter_sakazakii	TBD	p505108-T6SS	acrB	0	0	0	0	0	0	0	0	0	0	0	0	0	0	0	0	0	0	0	0	0	0	98.07	98.07	98.07	98.07	98.43	98.07	98.07	98.07	98.07	98.07	98.07	98.07	0	0	0	0	98.13	0	0	0	0	98.07	97.97	0
Cronobacter_sakazakii	TBD	p505108-T6SS	aphA1	0	0	0	0	0	0	0	0	0	0	0	0	0	0	0	0	0	0	0	0	0	0	0	0	0	0	0	0	0	0	0	0	0	0	0	0	0	0	0	0	0	0	0	0	0	0
Cronobacter_sakazakii	TBD	p505108-T6SS	ariR	0	0	0	0	0	0	0	0	0	0	0	0	0	0	0	0	0	0	0	0	0	0	0	0	0	0	0	0	0	0	0	0	0	0	0	0	0	0	0	0	0	0	0	0	0	0
Cronobacter_sakazakii	TBD	p505108-T6SS	arsB	0	0	0	0	0	0	80.94	0	0	0	0	0	0	0	0	0	0	95.88	0	0	0	0	0	0	0	0	0	0	0	0	0	0	0	0	0	0	0	0	0	0	0	0	0	0	0	0
Cronobacter_sakazakii	TBD	p505108-T6SS	arsC	0	0	0	0	0	0	0	0	0	0	0	0	0	0	0	0	0	0	0	0	0	0	0	0	0	0	0	0	0	0	0	0	0	0	0	0	0	0	0	0	0	0	0	0	0	0
Cronobacter_sakazakii	TBD	p505108-T6SS	arsR	0	0	0	0	0	0	79.1	0	79.1	79.1	0	0	0	0	0	0	0	0	0	0	0	0	0	0	0	0	0	0	0	0	0	0	0	0	0	0	0	0	0	0	0	0	0	0	0	0
Cronobacter_sakazakii	TBD	p505108-T6SS	autotransporter	0	0	0	0	0	0	0	0	0	0	0	0	0	0	0	0	0	0	0	0	0	0	0	0	0	0	0	0	0	0	0	0	0	98.67	0	0	0	0	0	0	0	0	0	0	0	0
Cronobacter_sakazakii	TBD	p505108-T6SS	bglP	0	0	0	0	0	0	0	0	0	0	0	0	0	0	0	0	0	0	0	0	0	0	0	0	0	0	0	0	0	0	0	0	0	0	0	0	0	0	0	0	0	0	0	0	0	0
Cronobacter_sakazakii	TBD	p505108-T6SS	citH	0	0	0	0	0	0	0	0	0	0	0	0	0	0	0	0	0	0	0	0	0	0	0	0	0	0	0	0	0	0	0	0	0	0	0	0	0	0	0	0	0	0	0	0	0	0
Cronobacter_sakazakii	TBD	p505108-T6SS	clpV1	0	0	0	0	0	0	79.04	79.34	79.04	79.04	0	0	0	0	0	0	0	0	0	0	0	0	84.52	84.52	84.52	84.52	84.52	84.52	84.52	84.52	84.52	84.52	84.52	84.52	0	0	0	0	83.73	84.29	0	0	84.29	83.78	83.61	0
Cronobacter_sakazakii	TBD	p505108-T6SS	cpa	0	0	0	0	0	0	0	0	0	0	0	0	0	0	0	0	0	0	0	0	0	0	0	0	0	0	0	0	0	0	0	0	0	0	0	0	0	0	0	0	0	0	0	0	0	0
Cronobacter_sakazakii	TBD	p505108-T6SS	cpdA	0	0	0	0	0	0	0	0	0	0	0	0	0	0	0	0	0	0	0	0	0	0	0	0	0	0	0	0	0	0	0	0	0	0	0	0	0	0	0	0	0	0	0	0	0	0
Cronobacter_sakazakii	TBD	p505108-T6SS	cpo	0	0	0	0	0	0	0	0	0	0	0	0	0	0	0	0	0	0	0	0	0	0	0	0	0	0	0	0	0	0	0	0	0	0	0	0	0	0	96.11	0	0	0	0	0	0	96.11
Cronobacter_sakazakii	TBD	p505108-T6SS	dapA	0	0	0	0	0	0	0	0	0	0	0	0	0	0	0	0	0	0	0	0	0	0	0	0	0	0	0	0	0	0	0	0	0	0	0	0	0	0	0	0	0	0	0	0	0	0
Cronobacter_sakazakii	TBD	p505108-T6SS	dsbG	0	0	0	0	0	0	0	0	0	0	0	0	0	0	0	0	0	0	0	0	0	0	0	0	0	0	0	0	0	0	0	0	0	0	0	0	0	0	0	0	0	0	0	0	0	0
Cronobacter_sakazakii	TBD	p505108-T6SS	eitA	0	0	0	0	0	0	0	0	0	0	0	0	0	0	0	0	0	0	0	0	0	0	0	0	0	0	0	0	0	0	0	0	0	0	0	0	0	0	0	0	0	0	0	0	0	0
Cronobacter_sakazakii	TBD	p505108-T6SS	eitB	0	0	0	0	0	0	0	0	0	0	0	0	0	0	0	0	0	0	0	0	0	0	95.58	95.58	95.58	95.58	95.58	95.58	95.58	95.58	95.58	95.58	95.58	95.58	0	0	0	0	100	96.06	96.06	96.06	96.06	95.68	96.45	96.25
Cronobacter_sakazakii	TBD	p505108-T6SS	eitC	0	0	0	0	0	0	0	0	0	0	0	0	0	0	0	0	0	0	0	0	0	0	94.6	94.6	94.6	94.6	94.6	94.6	94.6	94.6	94.6	94.6	94.6	94.6	0	0	0	0	91.24	95.39	95.39	95.39	95.39	95.52	95.26	95.52
Cronobacter_sakazakii	TBD	p505108-T6SS	eitD	0	0	0	0	0	0	0	0	0	0	0	0	0	0	0	0	0	0	0	0	0	0	0	0	0	0	0	0	0	0	0	0	0	0	0	0	0	0	0	0	0	0	0	0	0	0
Cronobacter_sakazakii	TBD	p505108-T6SS	glgX	0	0	0	0	0	0	0	0	0	0	0	0	0	0	0	0	0	0	0	0	0	0	0	0	0	0	0	0	0	0	0	0	0	0	0	0	0	0	0	0	0	0	0	0	0	0
Cronobacter_sakazakii	TBD	p505108-T6SS	gloA	0	0	0	0	0	0	0	0	0	0	0	0	0	0	0	0	0	0	0	0	0	0	0	0	0	0	0	0	0	0	0	0	0	0	0	0	0	0	0	0	0	0	0	0	0	0
Cronobacter_sakazakii	TBD	p505108-T6SS	gntR	0	0	0	0	0	0	0	0	0	0	0	0	0	0	0	0	0	0	0	0	0	0	0	0	0	0	0	0	0	0	0	0	0	0	0	0	0	0	0	0	0	0	0	0	0	0
Cronobacter_sakazakii	TBD	p505108-T6SS	gstF	0	0	0	0	0	0	0	0	0	0	0	0	0	0	0	0	0	0	0	0	0	0	0	0	0	0	0	0	0	0	96.4	0	0	0	0	0	0	0	0	0	0	0	0	0	0	0
Cronobacter_sakazakii	TBD	p505108-T6SS	guaD	0	0	0	0	0	0	0	0	0	0	0	0	0	0	0	0	0	0	0	0	0	0	0	0	0	0	0	0	0	0	0	0	0	0	0	0	0	0	0	0	0	0	0	0	0	0
Cronobacter_sakazakii	TBD	p505108-T6SS	hcp1	0	85.07	0	90.31	0	0	90.17	0	0	0	0	0	0	0	0	0	0	0	0	90.52	90.52	0	96.54	96.54	96.54	96.54	96.54	96.54	96.54	96.54	96.54	96.54	96.54	96.54	0	0	0	0	96.54	96.14	0	0	96.14	96.54	96.54	0
Cronobacter_sakazakii	TBD	p505108-T6SS	hipA	0	0	0	0	0	0	89.09	0	0	0	0	0	0	0	0	0	0	0	90.03	0	0	0	0	0	0	0	0	0	0	0	0	0	0	0	0	0	0	0	0	0	0	0	0	0	0	0
Cronobacter_sakazakii	TBD	p505108-T6SS	hipB	0	0	0	0	0	0	0	0	0	0	0	0	0	0	0	0	0	0	0	0	0	0	0	0	0	0	0	0	0	0	0	0	0	0	0	0	0	0	0	0	0	0	0	0	0	0
Cronobacter_sakazakii	TBD	p505108-T6SS	impB	0	0	0	0	0	0	0	0	0	0	0	0	0	0	0	0	0	0	0	0	0	0	92.37	92.37	92.37	92.37	92.37	92.37	92.37	92.37	92.37	92.37	92.37	92.37	0	0	0	0	92.37	92.37	92.37	92.37	92.37	92.57	91.38	92.57
Cronobacter_sakazakii	TBD	p505108-T6SS	impC	0	82.24	0	83.86	0	0	0	83.95	84.09	84.16	0	0	0	0	0	0	0	0	0	84.09	84.09	0	93.11	93.11	93.11	93.11	93.11	93.11	93.11	93.11	93.11	93.11	93.11	93.11	0	0	0	0	92.72	92.92	93.67	93.67	92.92	93.05	92.4	92.98
Cronobacter_sakazakii	TBD	p505108-T6SS	impJ	0	0	0	0	0	0	0	0	0	0	0	0	0	0	0	0	0	0	0	0	0	0	0	0	0	0	0	0	0	0	0	0	0	0	0	0	0	0	0	0	0	0	0	0	0	0
Cronobacter_sakazakii	TBD	p505108-T6SS	impK	0	0	0	0	0	0	0	0	0	0	0	0	0	0	0	0	0	0	0	0	0	0	0	0	0	0	0	0	0	0	0	0	0	0	0	0	0	0	0	0	0	0	0	0	0	0
Cronobacter_sakazakii	TBD	p505108-T6SS	int	0	0	0	0	0	0	0	0	0	0	0	0	0	0	0	0	0	0	0	0	0	0	0	0	0	0	0	0	0	0	0	0	0	0	0	0	0	0	0	0	0	0	0	0	0	0
Cronobacter_sakazakii	TBD	p505108-T6SS	iucA	0	0	0	0	0	0	92.22	0	0	0	0	0	0	0	0	0	0	0	0	0	0	0	96.05	96.05	96.05	96.05	96.05	96.05	96.05	100	96.05	96.05	96.05	96.05	0	0	0	0	0	0	0	0	0	0	0	96.11
Cronobacter_sakazakii	TBD	p505108-T6SS	iucB	0	0	0	0	0	0	0	0	0	0	0	0	0	0	0	0	0	0	0	0	0	0	0	0	0	0	0	0	0	0	0	0	0	0	0	0	0	0	0	0	0	0	0	0	0	0
Cronobacter_sakazakii	TBD	p505108-T6SS	iucC	0	0	0	0	0	0	91.17	0	92.13	0	0	0	0	0	0	0	0	0	0	0	0	0	0	0	0	0	0	0	0	0	0	0	0	0	0	0	0	0	0	0	0	0	0	0	0	0
Cronobacter_sakazakii	TBD	p505108-T6SS	iucD	0	0	0	0	0	0	0	0	0	0	0	0	0	0	0	0	0	0	0	0	0	0	0	0	0	0	0	0	0	0	0	0	0	0	0	0	0	0	0	95.46	95.46	95.46	95.46	0	0	0
Cronobacter_sakazakii	TBD	p505108-T6SS	iutA	0	0	0	89.07	88.93	89.03	89.12	89.3	0	89.12	0	0	0	0	0	89.21	89.21	0	0	88.44	88.42	89.03	0	0	0	0	0	0	0	0	0	0	0	0	0	0	0	0	0	0	0	0	0	0	0	0
Cronobacter_sakazakii	TBD	p505108-T6SS	mfs-1	0	0	0	0	0	0	0	0	0	0	0	0	0	0	0	0	0	0	0	0	0	0	0	0	0	0	0	0	0	0	0	0	0	0	0	0	0	0	99.1	0	0	0	0	0	0	0
Cronobacter_sakazakii	TBD	p505108-T6SS	mgtB	0	0	0	0	0	0	0	0	0	0	0	0	0	0	0	0	0	0	0	0	0	0	0	0	0	0	0	0	0	0	0	0	0	0	0	0	0	0	0	0	0	0	0	0	0	0
Cronobacter_sakazakii	TBD	p505108-T6SS	mipA	0	0	0	0	0	0	0	0	0	0	0	0	0	0	0	0	0	0	0	0	0	0	0	0	0	0	0	0	0	0	0	0	0	0	0	0	0	0	0	0	0	0	0	96.89	0	0
Cronobacter_sakazakii	TBD	p505108-T6SS	modA	0	0	0	0	0	0	0	0	0	0	0	0	0	0	0	0	0	0	0	0	0	0	0	0	0	0	0	0	0	0	0	0	0	0	0	0	0	0	0	0	0	0	0	0	0	0
Cronobacter_sakazakii	TBD	p505108-T6SS	mutT	0	0	0	0	0	0	0	0	0	0	0	0	0	0	0	0	0	0	0	0	0	0	0	0	0	0	0	0	0	0	0	0	0	0	0	0	0	0	0	94.14	94.14	94.14	94.14	0	0	0
Cronobacter_sakazakii	TBD	p505108-T6SS	nuclear	0	0	0	0	0	0	0	0	0	0	0	0	0	0	0	0	0	0	0	0	0	0	0	0	0	0	0	0	0	0	0	0	0	0	0	0	0	0	0	0	0	0	0	0	0	0
Cronobacter_sakazakii	TBD	p505108-T6SS	ompA	0	0	0	81.6	0	0	81.33	81.65	81.33	81.33	0	0	0	0	0	0	0	0	0	81.65	81.65	0	91.13	91.13	91.13	91.13	91.13	91.13	91.13	91.13	91.13	91.13	91.13	91.13	0	0	0	0	85.45	90.89	0	0	90.89	91.18	91.91	0
Cronobacter_sakazakii	TBD	p505108-T6SS	parA	0	0	0	0	0	0	0	0	0	0	0	0	0	0	0	0	0	0	0	0	0	0	0	0	0	0	0	0	0	0	0	0	0	0	0	0	0	0	0	0	0	0	0	0	0	0
Cronobacter_sakazakii	TBD	p505108-T6SS	parB	0	0	0	0	0	0	0	0	0	0	0	0	0	0	0	0	0	0	0	0	0	0	0	0	0	0	0	0	0	0	0	0	0	0	0	0	0	0	0	0	0	0	0	0	0	0
Cronobacter_sakazakii	TBD	p505108-T6SS	phospholipase	0	0	0	0	0	0	0	0	0	0	0	0	0	0	0	0	0	0	0	0	0	0	0	0	0	0	0	0	0	0	0	0	0	0	0	0	0	0	0	0	0	0	0	95.6	0	0
Cronobacter_sakazakii	TBD	p505108-T6SS	putative_integral_membrane_protein	0	0	0	0	0	0	0	0	0	0	0	0	0	0	0	0	0	0	0	0	0	0	0	0	0	0	0	0	0	0	0	0	0	0	0	0	0	0	0	0	0	0	0	0	0	0
Cronobacter_sakazakii	TBD	p505108-T6SS	repA	0	0	0	0	0	0	0	0	0	0	0	0	0	0	0	0	0	0	0	0	0	0	0	0	0	0	0	0	0	0	0	0	0	0	0	0	0	0	0	0	0	0	0	0	0	0
Cronobacter_sakazakii	TBD	p505108-T6SS	rimL	0	0	0	0	0	0	0	0	0	0	0	0	0	0	0	0	0	0	0	0	0	0	0	0	0	0	0	0	0	0	0	0	0	0	0	0	0	0	0	0	0	0	0	0	96.42	0
Cronobacter_sakazakii	TBD	p505108-T6SS	roxA	0	0	0	0	0	82.91	0	0	0	0	0	0	0	0	82.91	0	82.78	0	0	0	0	82.91	84.62	84.62	84.62	84.62	84.62	84.62	84.62	84.62	84.62	84.62	84.62	84.62	0	0	0	0	100	85.97	85.97	85.97	85.97	84.29	86.15	86.33
Cronobacter_sakazakii	TBD	p505108-T6SS	rspA	0	0	0	0	0	0	0	0	0	0	0	0	0	0	0	0	0	0	0	0	0	0	0	0	0	0	0	0	0	0	0	0	0	0	0	0	0	0	96.75	0	0	0	0	0	0	0
Cronobacter_sakazakii	TBD	p505108-T6SS	scsA	82.14	82.14	0	0	0	0	0	0	0	0	0	0	0	0	0	0	0	0	0	0	0	0	0	0	0	0	0	0	0	0	0	0	0	0	0	0	0	0	0	0	0	0	0	0	0	0
Cronobacter_sakazakii	TBD	p505108-T6SS	scsB	0	0	0	0	0	0	0	0	0	0	0	0	0	0	0	0	0	0	0	0	0	0	0	0	0	0	0	0	0	0	0	0	0	0	0	0	0	0	0	0	0	0	0	0	0	0
Cronobacter_sakazakii	TBD	p505108-T6SS	shiF	0	0	0	0	0	0	0	0	95.5	0	0	0	0	0	0	0	0	0	0	93.23	0	0	0	0	0	0	0	0	0	0	0	0	0	0	0	0	0	0	0	0	0	0	0	0	0	0
Cronobacter_sakazakii	TBD	p505108-T6SS	tnpA	0	0	0	0	0	0	0	0	0	0	0	0	0	0	0	0	0	0	0	0	0	0	0	0	0	0	0	0	0	0	0	0	0	0	0	0	0	0	0	0	0	0	0	0	95.15	0
Cronobacter_sakazakii	TBD	p505108-T6SS	tnpB	0	0	0	0	0	0	0	0	0	0	0	0	0	0	0	0	0	0	0	0	0	0	0	0	0	0	0	0	0	0	0	0	0	0	0	0	0	0	0	0	0	0	0	0	0	0
Cronobacter_sakazakii	TBD	p505108-T6SS	treY	0	0	0	0	0	0	0	0	0	0	0	0	0	0	0	0	0	0	0	0	0	0	0	0	0	0	0	0	0	0	0	0	0	0	0	0	0	0	0	0	0	0	0	0	0	0
Cronobacter_sakazakii	TBD	p505108-T6SS	treZ	0	0	0	90.99	0	0	90.23	0	0	0	0	0	0	0	0	0	0	0	0	0	0	0	0	0	0	0	0	0	0	0	0	0	0	0	0	0	0	0	95.8	0	0	0	0	96.02	0	0
Cronobacter_sakazakii	TBD	p505108-T6SS	trkG	0	0	0	0	0	0	0	0	0	0	0	0	0	0	0	0	0	0	0	0	0	0	0	0	0	0	0	0	0	0	0	0	0	0	0	0	0	0	0	0	0	0	0	0	0	0
Cronobacter_sakazakii	TBD	p505108-T6SS	tsr	0	100	100	100	100	100	100	100	100	100	0	100	100	100	100	100	100	100	100	100	100	100	100	100	100	100	100	100	100	100	100	100	100	100	0	0	0	0	100	100	100	100	100	100	100	100
Cronobacter_sakazakii	TBD	p505108-T6SS	tsrI	0	100	100	100	100	100	100	100	100	100	0	100	100	100	100	100	100	100	100	100	100	100	100	100	100	100	100	100	100	100	100	100	100	100	0	0	0	0	100	100	100	100	100	100	100	100
Cronobacter_sakazakii	TBD	p505108-T6SS	type	0	0	0	0	0	0	0	0	0	0	0	0	0	0	0	0	0	0	0	0	0	0	0	0	0	0	0	0	0	0	0	0	0	0	0	0	0	0	0	0	0	0	0	0	0	0
Cronobacter_sakazakii	TBD	p505108-T6SS	vasD	0	0	0	0	0	0	0	0	0	0	0	0	0	0	0	0	0	0	0	0	0	0	0	0	0	0	0	0	0	0	0	0	0	0	0	0	0	0	0	0	0	0	0	0	0	0
Cronobacter_sakazakii	TBD	p505108-T6SS	vgrG	0	0	0	0	0	0	0	0	0	0	0	0	0	0	0	0	0	0	0	0	0	0	0	0	0	0	0	0	0	0	0	0	0	0	0	0	0	0	0	0	0	0	0	0	0	0
Cronobacter_sakazakii	TBD	p505108-T6SS	viuB	0	0	0	0	0	0	0	0	0	0	0	0	0	0	0	0	0	0	0	0	0	0	0	0	0	0	0	0	0	0	0	0	0	0	0	0	0	0	0	0	0	0	0	0	0	0
Cronobacter_sakazakii	TBD	p505108-T6SS	ybhD	0	0	0	0	0	0	0	0	0	0	0	0	0	0	0	0	0	0	0	0	0	0	0	0	0	0	0	0	0	0	0	0	0	0	0	0	0	0	0	0	0	0	0	0	0	0
Cronobacter_sakazakii	TBD	p505108-T6SS	ycgE	0	0	0	0	0	0	0	0	0	0	0	0	0	0	0	0	0	0	0	0	0	0	0	0	0	0	0	0	0	0	0	0	0	0	0	0	0	0	0	0	0	0	0	0	0	0
Cronobacter_sakazakii	TBD	p505108-T6SS	ycgZ	0	0	0	0	0	0	0	0	0	0	0	0	0	0	0	91.26	0	0	0	0	0	0	0	0	0	0	0	0	0	0	0	0	0	0	0	0	0	0	0	0	98.61	0	0	0	100	100
Cronobacter_sakazakii	TBD	p505108-T6SS	ymjA	0	0	0	0	0	0	0	0	0	0	0	0	0	0	0	0	0	0	0	0	0	0	96.34	96.34	96.34	96.34	96.34	96.34	96.34	96.34	96.34	96.34	96.34	96.34	0	0	0	0	0	0	0	0	0	96.75	0	96.34
Cronobacter_sakazakii	TBD	p505108-T6SS	ynaJ	0	0	0	0	0	0	0	0	0	0	0	0	0	0	0	0	0	0	0	0	0	0	98.08	98.08	98.08	98.08	98.08	98.08	98.08	98.08	98.08	98.08	98.08	98.08	0	0	0	0	98.08	0	0	0	0	98.47	97.7	98.08
Cronobacter_sakazakii	TBD	p505108-T6SS	yozV	0	0	0	0	0	0	0	0	0	0	0	0	0	0	0	0	0	0	0	0	0	0	0	0	0	0	0	0	0	0	0	0	0	0	0	0	0	0	0	0	0	0	0	0	0	0
Cronobacter_sakazakii	TBD	p505108-T6SS	yqhD	0	0	0	0	0	0	0	0	0	0	0	0	0	0	0	0	0	0	0	0	0	0	0	0	0	0	0	0	0	0	0	0	0	0	0	0	0	0	0	0	0	0	0	0	0	0
Cronobacter_sakazakii	heavy_metal_resistance	CSAK29544_3p	AbrB/MazE/SpoVT_family_DNA-binding_domain-containing_protein	0	0	0	0	0	97.84	0	0	0	0	0	0	0	0	0	96.97	0	85.92	85.92	0	0	0	0	0	0	0	0	0	0	0	0	0	0	0	0	0	100	100	0	0	97.84	97.84	0	0	0	0
Cronobacter_sakazakii	heavy_metal_resistance	CSAK29544_3p	DNA_partition_complex_ParG	0	0	0	0	0	98.33	98.33	99.58	0	98.33	0	0	0	0	0	98.75	0	0	0	0	0	0	0	0	0	0	0	0	0	0	0	0	0	0	0	0	99.17	100	0	0	99.17	99.17	0	0	0	0
Cronobacter_sakazakii	heavy_metal_resistance	CSAK29544_3p	DUF2933_domain-containing_protein	0	0	0	0	0	0	0	0	0	0	0	0	0	0	0	0	0	0	0	0	0	0	0	0	0	0	0	0	0	0	0	0	0	0	0	0	100	100	0	0	0	0	0	0	98.99	99.49
Cronobacter_sakazakii	heavy_metal_resistance	CSAK29544_3p	DUF305_domain-containing_protein	0	0	0	0	0	0	0	0	0	0	0	0	0	0	0	0	0	0	0	0	0	0	0	0	0	0	0	0	0	0	0	0	0	0	0	0	100	100	0	0	0	0	0	0	93.4	93.4
Cronobacter_sakazakii	heavy_metal_resistance	CSAK29544_3p	DUF4145_domain-containing_protein	0	0	0	0	0	0	0	0	0	0	0	0	0	0	0	0	0	0	0	0	0	0	0	0	0	0	0	0	0	0	0	0	0	0	0	0	100	100	0	0	0	0	0	0	0	0
Cronobacter_sakazakii	heavy_metal_resistance	CSAK29544_3p	DUF4225_domain-containing_protein	0	0	0	0	0	96.14	0	95.27	0	0	0	0	0	0	0	93.62	0	0	0	0	0	0	0	0	0	0	0	0	0	0	0	0	0	0	0	0	99.88	100	0	0	96.14	96.14	0	0	0	0
Cronobacter_sakazakii	heavy_metal_resistance	CSAK29544_3p	GNAT_family_N-acetyltransferase	0	0	0	0	0	0	0	0	0	0	0	0	0	0	0	100	0	0	0	0	0	0	0	0	0	0	0	0	0	0	0	0	0	0	0	0	100	100	0	0	0	0	0	0	0	0
Cronobacter_sakazakii	heavy_metal_resistance	CSAK29544_3p	HNH_endonuclease	0	0	0	0	0	0	0	0	0	0	0	0	0	0	0	0	0	0	0	0	0	0	0	0	0	0	0	0	0	0	0	0	0	0	0	0	100	100	0	0	0	0	0	0	0	0
Cronobacter_sakazakii	heavy_metal_resistance	CSAK29544_3p	Hok/Gef_family_protein	0	0	85.53	0	85.53	98.74	100	100	85.53	100	0	0	0	0	0	100	0	100	100	85.53	0	0	86.16	86.16	86.16	86.16	86.16	86.16	86.16	86.16	86.16	86.16	86.16	86.16	0	0	98.74	100	86.79	0	98.74	98.74	0	84.91	86.79	86.16
Cronobacter_sakazakii	heavy_metal_resistance	CSAK29544_3p	M23_family_metallopeptidase	0	0	0	0	0	0	0	0	0	0	0	0	0	0	0	100	0	0	0	0	0	0	0	0	0	0	0	0	0	0	0	0	0	0	0	0	100	100	0	0	0	0	0	0	100	100
Cronobacter_sakazakii	heavy_metal_resistance	CSAK29544_3p	N-acetyltransferase	0	0	0	0	0	0	0	0	0	0	0	0	0	0	0	99.8	0	0	0	0	0	0	0	0	0	0	0	0	0	0	0	0	0	0	0	0	0	99.8	0	0	0	0	0	0	0	0
Cronobacter_sakazakii	heavy_metal_resistance	CSAK29544_3p	ParA_family_protein	0	0	0	0	0	98.87	98.71	99.84	0	98.71	0	0	0	0	0	98.87	0	0	0	0	0	0	0	0	0	0	0	0	0	0	0	0	0	0	0	0	98.54	100	0	0	98.54	98.54	0	0	0	0
Cronobacter_sakazakii	heavy_metal_resistance	CSAK29544_3p	RepB_family_plasmid_replication_initiator_protein	0	0	0	0	0	99.66	99.43	100	0	99.43	0	0	0	0	0	99.54	0	0	0	0	0	0	0	0	0	0	0	0	0	0	0	0	0	0	0	0	99.66	100	0	0	99.77	99.77	0	0	0	0
Cronobacter_sakazakii	heavy_metal_resistance	CSAK29544_3p	arsA	0	0	0	0	0	0	0	0	0	0	0	0	0	0	0	97.49	0	0	0	0	0	0	0	0	0	0	0	0	0	0	0	0	0	0	0	0	100	99.94	0	0	0	0	0	0	0	0
Cronobacter_sakazakii	heavy_metal_resistance	CSAK29544_3p	arsB	0	0	0	0	0	0	0	0	0	0	0	0	0	0	0	99.07	0	0	0	0	0	0	0	0	0	0	0	0	0	0	0	0	0	0	0	0	100	100	0	0	0	0	0	0	0	0
Cronobacter_sakazakii	heavy_metal_resistance	CSAK29544_3p	arsC	0	0	0	0	0	0	0	0	0	0	0	0	0	0	0	100	0	0	0	0	0	0	0	0	0	0	0	0	0	0	0	0	0	0	0	0	100	100	0	0	0	0	0	0	0	0
Cronobacter_sakazakii	heavy_metal_resistance	CSAK29544_3p	arsD	0	0	0	0	0	0	0	0	0	0	0	0	0	0	0	100	0	0	0	0	0	0	0	0	0	0	0	0	0	0	0	0	0	0	0	0	99.72	100	0	0	0	0	0	0	0	0
Cronobacter_sakazakii	heavy_metal_resistance	CSAK29544_3p	arsR	0	0	0	0	0	0	0	0	0	0	0	0	0	0	0	100	0	0	0	0	0	0	0	0	0	0	0	0	0	0	0	0	0	0	0	0	100	100	0	0	0	0	0	0	0	0
Cronobacter_sakazakii	heavy_metal_resistance	CSAK29544_3p	arsenite-activated_ATPase_ArsA_family	0	0	0	0	0	0	0	0	0	0	0	0	0	0	0	100	0	0	0	0	0	0	0	0	0	0	0	0	0	0	0	0	0	0	0	0	100	100	0	0	0	0	0	0	0	0
Cronobacter_sakazakii	heavy_metal_resistance	CSAK29544_3p	conjugal_transfer_protein_TraX	0	0	0	0	0	92.76	94.63	100	0	94.63	0	0	0	0	0	0	0	96.51	96.51	0	0	0	0	0	0	0	0	0	0	0	0	0	0	0	0	0	100	100	0	0	92.76	92.76	0	0	0	0
Cronobacter_sakazakii	heavy_metal_resistance	CSAK29544_3p	copper_resistance_protein	0	0	0	0	0	0	0	0	0	0	0	0	0	0	0	99.77	0	0	0	0	0	0	0	0	0	0	0	0	0	0	0	0	0	0	0	0	100	100	0	0	0	0	0	0	99.77	99.77
Cronobacter_sakazakii	heavy_metal_resistance	CSAK29544_3p	cusF	0	0	0	0	0	0	0	0	0	0	0	0	0	0	0	99.44	0	0	0	0	0	0	0	0	0	0	0	0	0	0	0	0	0	0	0	0	100	100	0	0	0	0	0	0	95.48	95.48
Cronobacter_sakazakii	heavy_metal_resistance	CSAK29544_3p	hypothetica_protein_1086	0	0	0	0	0	96.22	0	96.78	0	0	0	0	0	0	0	97.51	0	0	0	0	0	0	0	0	0	0	0	0	0	0	0	0	0	0	0	0	100	100	0	0	96.22	96.22	0	0	0	0
Cronobacter_sakazakii	heavy_metal_resistance	CSAK29544_3p	hypothetical_protein_192	0	0	0	0	0	0	0	0	0	0	0	0	0	0	0	0	0	0	0	0	0	0	0	0	0	0	0	0	0	0	0	0	0	0	0	0	0	100	0	0	0	0	0	0	0	0
Cronobacter_sakazakii	heavy_metal_resistance	CSAK29544_3p	hypothetical_protein_213	0	0	0	0	0	98.1	0	95.73	0	0	0	0	0	0	0	0	0	0	0	0	0	0	0	0	0	0	0	0	0	0	0	0	0	0	0	0	100	100	0	0	98.1	98.1	0	0	0	0
Cronobacter_sakazakii	heavy_metal_resistance	CSAK29544_3p	hypothetical_protein_282	0	0	0	0	0	0	96.45	0	0	96.81	0	0	0	0	0	0	0	0	0	0	0	0	0	0	0	0	0	0	0	0	0	0	0	0	0	0	0	100	0	0	93.93	93.93	0	0	0	0
Cronobacter_sakazakii	heavy_metal_resistance	CSAK29544_3p	hypothetical_protein_324	0	0	0	0	0	95.37	0	95.99	0	0	0	0	0	0	0	0	0	0	0	0	0	0	0	0	0	0	0	0	0	0	0	0	0	0	0	0	100	100	0	0	95.37	95.37	0	0	0	0
Cronobacter_sakazakii	heavy_metal_resistance	CSAK29544_3p	hypothetical_protein_354	0	0	0	0	0	91.69	0	0	0	0	0	0	0	0	0	0	0	0	0	0	0	0	0	0	0	0	0	0	0	0	0	0	0	0	0	0	100	100	0	0	91.69	91.69	0	0	0	0
Cronobacter_sakazakii	heavy_metal_resistance	CSAK29544_3p	hypothetical_protein_381	0	0	0	0	0	0	0	0	0	0	0	0	0	0	0	0	0	0	0	0	0	0	0	0	0	0	0	0	0	0	0	0	0	0	0	0	0	100	0	0	0	0	0	0	0	0
Cronobacter_sakazakii	heavy_metal_resistance	CSAK29544_3p	hypothetical_protein_441	0	0	0	0	0	0	0	0	0	0	0	0	0	0	0	99.77	0	0	0	0	0	0	0	0	0	0	0	0	0	0	0	0	0	0	0	0	99.77	100	0	0	0	0	0	0	0	0
Cronobacter_sakazakii	heavy_metal_resistance	CSAK29544_3p	hypothetical_protein_498	0	0	0	0	0	91.57	89.37	90.96	0	89.37	0	0	0	0	0	95.38	0	92.02	92.02	0	0	0	0	0	0	0	0	0	0	0	0	0	0	0	0	0	100	100	0	0	91.57	91.57	0	0	0	0
Cronobacter_sakazakii	heavy_metal_resistance	CSAK29544_3p	pcoA	0	0	0	0	0	86.47	0	0	0	0	0	0	0	0	0	100	0	0	0	0	0	0	0	0	0	0	0	0	0	0	0	0	0	0	0	0	100	99.94	0	0	86.47	86.47	0	0	99.72	99.89
Cronobacter_sakazakii	heavy_metal_resistance	CSAK29544_3p	pcoB	0	0	0	0	0	82.32	0	0	0	0	0	0	0	0	0	100	0	0	0	0	0	0	0	0	0	0	0	0	0	0	0	0	0	0	0	0	99.89	100	0	0	82.32	82.32	0	0	100	100
Cronobacter_sakazakii	heavy_metal_resistance	CSAK29544_3p	pcoC	0	0	0	0	0	0	0	0	0	0	0	0	0	0	0	99.74	0	0	0	0	0	0	0	0	0	0	0	0	0	0	0	0	0	0	0	0	99.74	100	0	0	0	0	0	0	100	100
Cronobacter_sakazakii	heavy_metal_resistance	CSAK29544_3p	pcoD	0	0	0	0	0	0	0	0	0	0	0	0	0	0	0	99.89	0	0	0	0	0	0	0	0	0	0	0	0	0	0	0	0	0	0	0	0	99.78	100	0	0	0	0	0	0	99.78	99.78
Cronobacter_sakazakii	heavy_metal_resistance	CSAK29544_3p	pcoE	0	0	0	0	0	82.76	0	0	0	0	0	0	0	0	0	100	0	0	0	0	0	0	0	0	0	0	0	0	0	0	0	0	0	0	0	0	100	100	0	0	82.76	82.76	0	0	0	0
Cronobacter_sakazakii	heavy_metal_resistance	CSAK29544_3p	pcoR	0	0	0	0	0	84.9	0	0	0	0	0	0	0	0	0	100	0	0	0	0	0	0	0	0	0	0	0	0	0	0	0	0	0	0	0	0	100	100	0	0	84.9	84.9	0	0	100	100
Cronobacter_sakazakii	heavy_metal_resistance	CSAK29544_3p	pcoS	0	0	0	0	0	84.59	0	0	0	0	0	0	0	0	0	100	0	0	0	0	0	0	0	0	0	0	0	0	0	0	0	0	0	0	0	0	99.93	100	0	0	84.59	84.59	0	0	99.71	99.64
Cronobacter_sakazakii	heavy_metal_resistance	CSAK29544_3p	phage_T7_exclusion_protein	0	0	0	0	0	94.27	0	95.86	0	0	0	0	0	0	0	0	0	0	0	0	0	0	0	0	0	0	0	0	0	0	0	0	0	0	0	0	99.95	100	0	0	94.27	94.27	0	0	0	0
Cronobacter_sakazakii	heavy_metal_resistance	CSAK29544_3p	phage_integrase_family_protein	0	0	0	0	0	99.11	88.29	99.11	0	93.28	0	0	0	0	0	98.61	0	94.51	94.43	0	0	0	0	0	0	0	0	0	0	0	0	0	0	0	0	0	0	100	0	0	92.05	92.05	0	0	0	0
Cronobacter_sakazakii	heavy_metal_resistance	CSAK29544_3p	porin	0	0	0	0	0	0	0	0	0	0	0	0	0	0	0	100	0	0	0	0	0	0	0	0	0	0	0	0	0	0	0	0	0	0	0	0	100	100	0	0	0	0	0	0	0	0
Cronobacter_sakazakii	heavy_metal_resistance	CSAK29544_3p	replication_initiator_protein_RepA	0	0	0	0	0	99.08	100	100	0	97.69	0	0	0	0	0	98.85	0	98.96	98.84	0	0	0	0	0	0	0	0	0	0	0	0	0	0	0	0	0	98.5	100	0	0	98.62	98.62	0	0	0	0
Cronobacter_sakazakii	heavy_metal_resistance	CSAK29544_3p	silA	0	0	0	0	0	87.73	0	0	0	0	0	0	0	0	0	99.87	0	0	0	0	0	0	0	0	0	0	0	0	0	0	0	0	0	0	0	0	99.97	100	0	0	87.73	87.73	0	0	94.97	95
Cronobacter_sakazakii	heavy_metal_resistance	CSAK29544_3p	silB	0	0	0	0	0	85.79	0	0	0	0	0	0	0	0	0	99.92	0	0	0	0	0	0	0	0	0	0	0	0	0	0	0	0	0	0	0	0	100	100	0	0	85.79	85.79	0	0	94.43	94.43
Cronobacter_sakazakii	heavy_metal_resistance	CSAK29544_3p	silC	0	0	0	0	0	85.21	0	0	0	0	0	0	0	0	0	0	0	0	0	0	0	0	100	0	0	0	0	0	0	0	0	0	0	0	0	0	99.78	100	0	0	85.14	85.14	0	0	98.63	98.85
Cronobacter_sakazakii	heavy_metal_resistance	CSAK29544_3p	silE	0	0	0	0	0	0	0	0	0	0	0	0	0	0	0	0	0	0	0	0	0	0	0	0	0	0	0	0	0	0	0	0	0	0	0	0	100	100	0	0	0	0	0	0	0	0
Cronobacter_sakazakii	heavy_metal_resistance	CSAK29544_3p	silP	0	0	0	0	0	100	0	0	0	0	0	0	0	0	0	97.53	0	0	0	0	0	0	0	0	0	0	0	0	0	0	0	0	0	0	0	0	99.96	100	0	0	83.05	83.05	0	0	97.01	97.09
Cronobacter_sakazakii	heavy_metal_resistance	CSAK29544_3p	silR	0	0	0	0	0	0	0	0	0	0	0	0	0	0	0	0	0	0	0	0	0	0	100	0	0	0	0	0	0	0	0	0	0	0	0	0	99.85	100	0	0	0	0	0	0	99.56	99.85
Cronobacter_sakazakii	heavy_metal_resistance	CSAK29544_3p	silS	0	0	0	0	0	83.1	0	0	0	0	0	0	0	0	0	0	0	0	0	0	0	0	0	0	0	0	0	0	0	0	0	0	0	0	0	0	100	100	0	0	83.1	83.1	0	0	99.19	99.12
Cronobacter_sakazakii	heavy_metal_resistance	CSAK29544_3p	tgtA5_cluster_protein_2	0	0	0	0	0	0	89.28	89.28	0	89.28	0	0	0	0	0	90.33	0	0	88.05	0	0	0	0	0	0	0	0	0	0	0	0	0	0	0	0	0	100	100	0	0	0	0	0	0	0	0
Cronobacter_sakazakii	heavy_metal_resistance	CSAK29544_3p	thioredoxin_domain-containing_protein	0	0	0	0	0	100	97.57	95.56	0	100	0	0	0	0	0	100	0	0	0	0	0	0	0	0	0	0	0	0	0	0	0	0	0	0	0	0	90.37	100	0	0	0	0	0	0	0	0
Cronobacter_sakazakii	heavy_metal_resistance	CSAK29544_3p	transcriptional_regulator	0	0	0	0	0	93.33	0	0	0	0	0	0	0	0	0	93.7	0	0	0	0	0	0	0	0	0	0	0	0	0	0	0	0	0	0	0	0	0	100	0	0	0	0	0	0	0	0
Cronobacter_sakazakii	heavy_metal_resistance	CSAK29544_3p	type_II_toxin-antitoxin_system_RelE/ParE_family_toxin	0	0	0	0	0	94.83	0	0	0	0	0	0	0	0	0	100	0	0	0	0	0	0	0	0	0	0	0	0	0	0	0	0	0	0	0	0	100	100	0	0	94.83	94.83	0	0	0	0
Cronobacter_sakazakii	heavy_metal_resistance	CSAK29544_3p	type_II_toxin-antitoxin_system_VapC_family_toxin	0	0	0	0	0	98.08	0	0	0	0	0	0	0	0	0	98.56	0	0	0	0	0	0	0	0	0	0	0	0	0	0	0	0	0	0	0	0	100	100	0	0	98.08	98.08	0	0	0	0
Cronobacter_sakazakii	heavy_metal_resistance	pCS1	3'-5'_exonuclease	0	0	0	0	0	0	0	0	0	0	0	0	0	0	0	0	0	0	0	0	0	0	0	0	0	0	0	0	0	0	0	0	0	0	0	0	0	0	0	99.28	0	0	99.28	0	0	0
Cronobacter_sakazakii	heavy_metal_resistance	pCS1	ABC_transporter	0	0	0	0	0	0	0	0	0	0	0	0	0	0	0	0	0	0	0	0	0	0	0	0	0	0	0	0	0	0	0	0	0	0	0	0	0	0	0	0	0	0	0	0	0	0
Cronobacter_sakazakii	heavy_metal_resistance	pCS1	ATP-dependent_helicase	0	0	0	0	0	0	0	0	0	0	0	0	0	0	0	0	0	0	0	0	0	0	0	0	0	0	0	0	0	0	0	0	0	0	0	0	0	0	0	97.81	0	0	97.81	0	0	0
Cronobacter_sakazakii	heavy_metal_resistance	pCS1	C-type_natriuretic_protein	0	0	0	0	0	0	0	0	0	0	0	0	0	0	0	0	0	0	0	0	0	0	0	0	0	0	0	0	0	0	0	0	0	0	0	0	0	0	0	95.36	0	0	95.36	0	0	0
Cronobacter_sakazakii	heavy_metal_resistance	pCS1	DDE-type_integrase/transposase/recombinase	0	0	0	0	0	0	0	0	0	0	0	0	0	0	0	0	0	0	0	0	0	0	0	0	0	0	0	0	0	0	0	0	0	0	0	0	0	0	0	0	100	100	0	0	99.49	0
Cronobacter_sakazakii	heavy_metal_resistance	pCS1	DEAD/DEAH_box_helicase	0	0	0	0	0	0	0	0	0	0	0	0	0	0	0	0	0	0	0	0	0	0	0	0	0	0	0	0	0	0	0	0	0	0	0	0	0	0	0	0	0	0	0	0	0	0
Cronobacter_sakazakii	heavy_metal_resistance	pCS1	DNA_helicase	0	0	0	0	0	0	0	0	0	0	0	0	0	0	0	0	0	0	0	0	0	0	0	0	0	0	0	0	0	0	0	0	0	0	0	0	0	0	0	83.11	0	0	83.11	0	0	0
Cronobacter_sakazakii	heavy_metal_resistance	pCS1	DNA_ligase	0	0	0	0	0	0	0	0	0	0	0	0	0	0	0	0	0	0	0	0	0	0	0	0	0	0	0	0	0	0	0	0	0	0	0	0	0	0	0	96.17	0	0	96.17	0	0	0
Cronobacter_sakazakii	heavy_metal_resistance	pCS1	DNA_polymerase_III_subunit_alpha	0	0	0	0	0	0	0	0	0	0	0	0	0	0	0	0	0	0	0	0	0	0	0	0	0	0	0	0	0	0	0	0	0	0	0	0	0	0	0	100	0	0	100	0	0	0
Cronobacter_sakazakii	heavy_metal_resistance	pCS1	DNA_primase	0	0	0	0	0	0	0	0	0	0	0	0	0	0	0	0	0	0	0	0	0	0	0	0	0	0	0	0	0	0	0	0	0	0	0	0	0	0	0	93.91	0	0	93.91	0	0	0
Cronobacter_sakazakii	heavy_metal_resistance	pCS1	DUF1778_domain-containing_protein	0	0	0	0	0	0	0	0	0	0	0	0	0	0	0	0	0	0	0	0	0	0	0	0	0	0	0	0	0	0	0	0	0	0	0	0	0	0	0	100	0	0	100	0	0	0
Cronobacter_sakazakii	heavy_metal_resistance	pCS1	DUF1983_domain-containing_protein	0	0	0	0	0	0	0	0	0	0	0	0	0	0	0	0	0	0	0	0	0	0	0	0	0	0	0	0	0	0	0	0	0	0	0	0	0	0	0	98.46	0	0	98.46	0	0	0
Cronobacter_sakazakii	heavy_metal_resistance	pCS1	DUF3927_domain-containing_protein	0	0	0	0	0	0	0	0	0	0	0	0	0	0	0	0	0	0	0	0	0	0	0	0	0	0	0	0	0	0	0	0	0	0	0	0	0	0	0	0	0	0	0	0	0	0
Cronobacter_sakazakii	heavy_metal_resistance	pCS1	DUF4942_domain-containing_protein	0	0	0	0	0	0	0	0	0	0	0	0	0	0	0	0	0	0	0	0	0	0	0	0	0	0	0	0	0	0	0	0	0	0	0	0	0	0	0	0	0	0	0	0	0	0
Cronobacter_sakazakii	heavy_metal_resistance	pCS1	GNAT_family_N-acetyltransferase	0	0	0	0	0	0	0	0	0	0	0	0	0	0	0	0	0	0	0	0	0	0	0	0	0	0	0	0	0	0	0	0	0	0	0	0	0	0	0	98.56	0	0	98.56	0	0	0
Cronobacter_sakazakii	heavy_metal_resistance	pCS1	IS110_family_transposase	0	0	0	0	0	0	0	0	0	0	0	0	0	0	0	0	0	0	0	0	0	0	0	0	0	0	0	0	0	0	0	0	0	0	0	0	0	0	0	0	0	0	0	0	0	0
Cronobacter_sakazakii	heavy_metal_resistance	pCS1	IS3_family_transposase	0	89.63	86.49	90.23	0	100	84.02	100	0	84.02	0	90.35	0	100	100	86.61	88.62	87.21	86.85	100	87.85	100	84.36	84.36	84.36	84.36	84.36	84.36	84.36	84.36	84.36	84.36	84.36	84.36	0	0	0	0	0	0	93.6	93.6	0	0	100	84.36
Cronobacter_sakazakii	heavy_metal_resistance	pCS1	Ig_domain-containing_protein	0	0	0	0	0	0	0	0	0	0	0	0	0	0	0	0	0	0	0	0	0	0	0	0	0	0	0	0	0	0	0	0	0	0	0	0	0	0	0	98.53	0	0	98.53	0	0	0
Cronobacter_sakazakii	heavy_metal_resistance	pCS1	MULTISPECIES:_AAA_family_ATPase	0	0	0	0	0	0	0	0	0	0	0	0	0	0	0	0	0	0	0	0	0	0	0	0	0	0	0	0	0	0	0	0	0	0	0	0	0	0	0	97.98	0	0	97.98	0	0	0
Cronobacter_sakazakii	heavy_metal_resistance	pCS1	N-acetyltransferase	0	0	0	0	0	0	0	0	0	0	0	0	0	0	0	0	0	0	0	0	0	0	0	0	0	0	0	0	0	0	0	0	0	0	0	0	0	0	0	98.15	0	0	98.15	0	0	0
Cronobacter_sakazakii	heavy_metal_resistance	pCS1	XRE_family_transcriptional_regulator	0	0	0	0	0	0	0	0	0	0	0	0	0	0	0	0	0	0	0	0	0	0	0	0	0	0	0	0	0	0	0	0	0	0	0	0	0	0	0	90.18	0	0	90.18	0	0	0
Cronobacter_sakazakii	heavy_metal_resistance	pCS1	adenylyl-sulfate_kinase	0	0	0	0	0	0	0	0	0	0	0	0	0	0	0	0	0	0	0	0	0	0	0	0	0	0	0	0	0	0	0	0	0	0	0	0	0	0	0	86.64	0	0	86.64	0	0	0
Cronobacter_sakazakii	heavy_metal_resistance	pCS1	chromosome_partitioning_protein_ParB	0	0	0	0	0	0	0	0	0	0	0	0	0	0	0	0	0	0	0	0	0	0	0	0	0	0	0	0	0	0	0	0	0	0	0	0	0	0	0	0	0	0	0	0	0	0
Cronobacter_sakazakii	heavy_metal_resistance	pCS1	colicin_resistance_protein_TciA	0	0	0	0	0	0	0	0	0	0	0	0	0	0	0	0	0	0	0	0	0	0	0	0	0	0	0	0	0	0	0	0	0	0	0	0	0	0	0	0	0	0	0	0	0	0
Cronobacter_sakazakii	heavy_metal_resistance	pCS1	dihydrofolate_reductase	0	0	0	0	0	0	0	0	0	0	0	0	0	0	0	0	0	0	0	0	0	0	0	0	0	0	0	0	0	0	0	0	0	0	0	0	0	0	0	97.9	0	0	97.9	0	0	0
Cronobacter_sakazakii	heavy_metal_resistance	pCS1	exonuclease	0	0	0	0	0	0	0	0	0	0	0	0	0	0	0	0	0	0	0	0	0	0	0	0	0	0	0	0	0	0	0	0	0	0	0	0	0	0	0	100	0	0	100	0	0	0
Cronobacter_sakazakii	heavy_metal_resistance	pCS1	exonuclease_SbcCD_subunit_D	0	0	0	0	0	0	0	0	0	0	0	0	0	0	0	0	0	0	0	0	0	0	0	0	0	0	0	0	0	0	0	0	0	0	0	0	0	0	0	98.43	0	0	98.43	0	0	0
Cronobacter_sakazakii	heavy_metal_resistance	pCS1	hypothetical_protein_1164	0	0	0	0	0	0	0	0	0	0	0	0	0	0	0	0	0	0	0	0	0	0	0	0	0	0	0	0	0	0	0	0	0	0	0	0	0	0	0	0	0	0	0	0	0	0
Cronobacter_sakazakii	heavy_metal_resistance	pCS1	hypothetical_protein_1200	0	0	0	0	0	0	0	0	0	0	0	0	0	0	0	0	0	0	0	0	0	0	0	0	0	0	0	0	0	0	0	0	0	0	0	0	0	0	0	0	0	0	0	0	0	0
Cronobacter_sakazakii	heavy_metal_resistance	pCS1	hypothetical_protein_180	0	0	0	0	0	0	0	0	0	0	0	0	0	0	0	0	0	0	0	0	0	0	0	0	0	0	0	0	0	0	0	0	0	0	0	0	0	0	0	0	0	0	0	0	0	0
Cronobacter_sakazakii	heavy_metal_resistance	pCS1	hypothetical_protein_189	0	0	0	0	0	0	0	0	0	0	0	0	0	0	0	0	0	0	0	0	0	0	0	0	0	0	0	0	0	0	0	0	0	0	0	0	0	0	0	95.77	0	0	95.77	0	0	0
Cronobacter_sakazakii	heavy_metal_resistance	pCS1	hypothetical_protein_191	0	0	0	0	0	0	0	0	0	0	0	0	0	0	0	0	0	0	0	0	0	0	0	0	0	0	0	0	0	0	0	0	0	0	0	0	0	0	0	0	0	0	0	0	0	0
Cronobacter_sakazakii	heavy_metal_resistance	pCS1	hypothetical_protein_198	0	0	0	0	0	0	0	0	0	0	0	0	0	0	0	0	0	0	0	0	0	0	0	0	0	0	0	0	0	0	0	0	0	0	0	0	0	0	0	0	0	0	0	0	0	0
Cronobacter_sakazakii	heavy_metal_resistance	pCS1	hypothetical_protein_204	0	0	0	0	0	0	0	0	0	0	0	0	0	0	0	0	0	0	0	0	0	0	0	0	0	0	0	0	0	0	0	0	0	0	0	0	0	0	0	98.54	0	0	98.54	0	0	0
Cronobacter_sakazakii	heavy_metal_resistance	pCS1	hypothetical_protein_207	0	0	0	0	0	0	0	0	0	0	0	0	0	0	0	0	0	0	0	0	0	0	0	0	0	0	0	0	0	0	0	0	0	0	0	0	0	0	0	0	0	0	0	0	0	0
Cronobacter_sakazakii	heavy_metal_resistance	pCS1	hypothetical_protein_213	0	0	0	0	0	0	0	0	0	0	0	0	0	0	0	0	0	0	0	0	0	0	0	0	0	0	0	0	0	0	0	0	0	0	0	0	0	0	0	93.43	0	0	93.43	0	0	0
Cronobacter_sakazakii	heavy_metal_resistance	pCS1	hypothetical_protein_216	0	0	0	0	0	0	0	0	0	0	0	0	0	0	0	0	0	0	0	0	0	0	0	0	0	0	0	0	0	0	0	0	0	0	0	0	0	0	0	93.98	0	0	93.98	0	0	0
Cronobacter_sakazakii	heavy_metal_resistance	pCS1	hypothetical_protein_219	0	0	0	0	0	0	0	0	0	0	0	0	0	0	0	0	0	0	0	0	0	0	0	0	0	0	0	0	0	0	0	0	0	0	0	0	0	0	0	0	0	0	0	0	0	0
Cronobacter_sakazakii	heavy_metal_resistance	pCS1	hypothetical_protein_225	0	0	0	0	0	0	0	0	0	0	0	0	0	0	0	0	0	0	0	0	0	0	0	0	0	0	0	0	0	0	0	0	0	0	0	0	0	0	0	99.56	0	0	99.56	0	0	0
Cronobacter_sakazakii	heavy_metal_resistance	pCS1	hypothetical_protein_228	0	94.48	100	96.27	0	0	0	95.65	0	0	0	100	0	100	94.41	95.65	0	94.38	100	97.18	0	100	94.38	94.38	94.38	94.38	94.38	94.38	94.38	94.38	94.38	94.38	94.38	94.38	0	0	0	0	93.33	0	96.84	96.84	0	0	0	95.71
Cronobacter_sakazakii	heavy_metal_resistance	pCS1	hypothetical_protein_231	0	0	0	0	0	0	0	0	0	0	0	0	0	0	0	0	0	0	0	0	0	0	0	0	0	0	0	0	0	0	0	0	0	0	0	0	0	0	0	0	0	0	0	0	0	0
Cronobacter_sakazakii	heavy_metal_resistance	pCS1	hypothetical_protein_234	0	0	0	0	0	0	0	0	0	0	0	0	0	0	0	0	0	0	0	0	0	0	0	0	0	0	0	0	0	0	0	0	0	0	0	0	0	0	0	100	0	0	100	0	0	0
Cronobacter_sakazakii	heavy_metal_resistance	pCS1	hypothetical_protein_240	0	0	0	0	0	0	0	0	0	0	0	0	0	0	0	0	0	0	0	0	0	0	0	0	0	0	0	0	0	0	0	0	0	0	0	0	0	0	0	0	0	0	0	0	0	0
Cronobacter_sakazakii	heavy_metal_resistance	pCS1	hypothetical_protein_243	0	0	0	0	0	0	0	0	0	0	0	0	0	0	0	0	0	0	0	0	0	0	0	0	0	0	0	0	0	0	0	0	0	0	0	0	0	0	0	0	0	0	0	0	0	0
Cronobacter_sakazakii	heavy_metal_resistance	pCS1	hypothetical_protein_246	0	0	0	0	0	0	0	0	0	0	0	0	0	0	0	0	0	0	0	0	0	0	0	0	0	0	0	0	0	0	0	0	0	0	0	0	0	0	0	100	0	0	100	0	0	0
Cronobacter_sakazakii	heavy_metal_resistance	pCS1	hypothetical_protein_252	0	0	0	0	0	0	0	0	0	0	0	0	0	0	0	0	0	0	0	0	0	0	0	0	0	0	0	0	0	0	0	0	0	0	0	0	0	0	0	97.22	0	0	97.22	0	0	0
Cronobacter_sakazakii	heavy_metal_resistance	pCS1	hypothetical_protein_255	0	0	0	0	0	0	0	0	0	0	0	0	0	0	0	0	0	0	0	0	0	0	0	0	0	0	0	0	0	0	0	0	0	0	0	0	0	0	0	0	0	0	0	0	0	0
Cronobacter_sakazakii	heavy_metal_resistance	pCS1	hypothetical_protein_257	0	0	0	0	0	0	0	0	0	0	0	0	0	0	0	0	0	0	0	0	0	0	0	0	0	0	0	0	0	0	0	0	0	0	0	0	0	0	0	94.14	0	0	94.14	0	0	0
Cronobacter_sakazakii	heavy_metal_resistance	pCS1	hypothetical_protein_261	0	0	0	0	0	0	0	0	0	0	0	0	0	0	0	0	0	0	0	0	0	0	0	0	0	0	0	0	0	0	0	0	0	0	0	0	0	0	0	95.02	0	0	95.02	0	0	0
Cronobacter_sakazakii	heavy_metal_resistance	pCS1	hypothetical_protein_267	0	0	0	0	0	0	0	0	0	0	0	0	0	0	0	0	0	0	0	0	0	0	0	0	0	0	0	0	0	0	0	0	0	0	0	0	0	0	0	98.88	0	0	98.88	0	0	0
Cronobacter_sakazakii	heavy_metal_resistance	pCS1	hypothetical_protein_276	0	0	0	0	0	0	0	0	0	0	0	0	0	0	0	0	0	0	0	0	0	0	0	0	0	0	0	0	0	0	0	0	0	0	0	0	0	0	0	93.84	0	0	93.84	0	0	0
Cronobacter_sakazakii	heavy_metal_resistance	pCS1	hypothetical_protein_279	0	0	0	0	0	0	0	0	0	0	0	0	0	0	0	0	0	0	0	0	0	0	0	0	0	0	0	0	0	0	0	0	0	0	0	0	0	0	0	96.03	0	0	96.03	0	0	0
Cronobacter_sakazakii	heavy_metal_resistance	pCS1	hypothetical_protein_300	0	0	0	0	0	0	0	0	0	0	0	0	0	0	0	0	0	0	0	0	0	0	0	0	0	0	0	0	0	0	0	0	0	0	0	0	0	0	0	0	0	0	0	0	0	0
Cronobacter_sakazakii	heavy_metal_resistance	pCS1	hypothetical_protein_312	0	0	0	0	0	0	0	0	0	0	0	0	0	0	0	0	0	0	0	0	0	0	0	0	0	0	0	0	0	0	0	0	0	0	0	0	0	0	0	0	0	0	0	0	0	0
Cronobacter_sakazakii	heavy_metal_resistance	pCS1	hypothetical_protein_318	0	0	0	0	0	0	0	0	0	0	0	0	0	0	0	0	0	0	0	0	0	0	0	0	0	0	0	0	0	0	0	0	0	0	0	0	0	0	0	94.34	0	0	94.34	0	0	0
Cronobacter_sakazakii	heavy_metal_resistance	pCS1	hypothetical_protein_324	0	0	0	0	0	0	0	0	0	0	0	0	0	0	0	0	0	0	0	0	0	0	0	0	0	0	0	0	0	0	0	0	0	0	0	0	0	0	0	95.99	0	0	95.99	0	0	0
Cronobacter_sakazakii	heavy_metal_resistance	pCS1	hypothetical_protein_339	0	0	0	0	0	0	0	0	0	0	0	0	0	0	0	0	0	0	0	0	0	0	0	0	0	0	0	0	0	0	0	0	0	0	0	0	0	0	0	89.38	0	0	89.38	0	0	0
Cronobacter_sakazakii	heavy_metal_resistance	pCS1	hypothetical_protein_345	0	0	0	0	0	0	0	0	0	0	0	0	0	0	0	0	0	0	0	0	0	0	0	0	0	0	0	0	0	0	0	0	0	0	0	0	0	0	0	98.26	0	0	98.26	0	0	0
Cronobacter_sakazakii	heavy_metal_resistance	pCS1	hypothetical_protein_360	0	0	0	0	0	0	0	0	0	0	0	0	0	0	0	0	0	0	0	0	0	0	0	0	0	0	0	0	0	0	0	0	0	0	0	0	0	0	0	97.47	0	0	97.47	0	0	0
Cronobacter_sakazakii	heavy_metal_resistance	pCS1	hypothetical_protein_375	0	0	0	0	0	0	0	0	0	0	0	0	0	0	0	0	0	0	0	0	0	0	0	0	0	0	0	0	0	0	0	0	0	0	0	0	0	0	0	0	0	0	0	0	0	0
Cronobacter_sakazakii	heavy_metal_resistance	pCS1	hypothetical_protein_384	0	0	0	0	0	0	0	0	0	0	0	0	0	0	0	0	0	0	0	0	0	0	0	0	0	0	0	0	0	0	0	0	0	0	0	0	0	0	0	99.48	0	0	99.48	0	0	0
Cronobacter_sakazakii	heavy_metal_resistance	pCS1	hypothetical_protein_396	0	0	0	0	0	0	0	0	0	0	0	0	0	0	0	0	0	0	0	0	0	0	0	0	0	0	0	0	0	0	0	0	0	0	0	0	0	0	0	0	0	0	0	0	0	0
Cronobacter_sakazakii	heavy_metal_resistance	pCS1	hypothetical_protein_411	0	0	0	0	0	0	0	0	0	0	0	0	0	0	0	0	0	0	0	0	0	0	0	0	0	0	0	0	0	0	0	0	0	0	0	0	0	0	0	98.78	0	0	98.78	0	0	0
Cronobacter_sakazakii	heavy_metal_resistance	pCS1	hypothetical_protein_414	0	0	0	0	0	0	0	0	0	0	0	0	0	0	0	0	0	0	0	0	0	0	0	0	0	0	0	0	0	0	0	0	0	0	0	0	0	0	0	98.07	0	0	98.07	0	0	0
Cronobacter_sakazakii	heavy_metal_resistance	pCS1	hypothetical_protein_417	0	0	0	0	0	0	0	0	0	0	0	0	0	0	0	0	0	0	0	0	0	0	0	0	0	0	0	0	0	0	0	0	0	0	0	0	0	0	0	97.84	0	0	97.84	0	0	0
Cronobacter_sakazakii	heavy_metal_resistance	pCS1	hypothetical_protein_420	0	0	0	0	0	0	0	0	0	0	0	0	0	0	0	0	0	0	0	0	0	0	0	0	0	0	0	0	0	0	0	0	0	0	0	0	0	0	0	98.33	0	0	98.33	0	0	0
Cronobacter_sakazakii	heavy_metal_resistance	pCS1	hypothetical_protein_432	0	0	0	0	0	0	0	0	0	0	0	0	0	0	0	0	0	0	0	0	0	0	0	0	0	0	0	0	0	0	0	0	0	0	0	0	0	0	0	96.76	0	0	96.76	0	0	0
Cronobacter_sakazakii	heavy_metal_resistance	pCS1	hypothetical_protein_435	0	0	0	0	0	0	0	0	0	0	0	0	0	0	0	0	0	0	0	0	0	0	0	0	0	0	0	0	0	0	0	0	0	0	0	0	0	0	0	97.01	0	0	97.01	0	0	0
Cronobacter_sakazakii	heavy_metal_resistance	pCS1	hypothetical_protein_444	0	0	0	0	0	0	0	0	0	0	0	0	0	0	0	0	0	0	0	0	0	0	0	0	0	0	0	0	0	0	0	0	0	0	0	0	0	0	0	99.1	0	0	99.1	0	0	0
Cronobacter_sakazakii	heavy_metal_resistance	pCS1	hypothetical_protein_474	0	0	0	0	0	0	0	0	0	0	0	0	0	0	0	0	0	0	0	0	0	0	0	0	0	0	0	0	0	0	0	0	0	0	0	0	0	0	0	97.89	0	0	97.89	0	0	0
Cronobacter_sakazakii	heavy_metal_resistance	pCS1	hypothetical_protein_483	0	0	0	0	0	0	0	0	0	0	0	0	0	0	0	0	0	0	0	0	0	0	0	0	0	0	0	0	0	0	0	0	0	0	0	0	0	0	0	0	0	0	0	0	0	0
Cronobacter_sakazakii	heavy_metal_resistance	pCS1	hypothetical_protein_531	0	0	0	0	0	0	0	0	0	0	0	0	0	0	0	0	0	0	0	0	0	0	0	0	0	0	0	0	0	0	0	0	0	0	0	0	0	0	0	0	0	0	0	0	0	0
Cronobacter_sakazakii	heavy_metal_resistance	pCS1	hypothetical_protein_564	0	0	0	0	0	0	0	0	0	0	0	0	0	0	0	0	0	0	0	0	0	0	0	0	0	0	0	0	0	0	0	0	0	0	0	0	0	0	0	98.4	0	0	98.4	0	0	0
Cronobacter_sakazakii	heavy_metal_resistance	pCS1	hypothetical_protein_570	0	0	0	0	0	0	0	0	0	0	0	0	0	0	0	0	0	0	0	0	0	0	0	0	0	0	0	0	0	0	0	0	0	0	0	0	0	0	0	97.89	0	0	97.89	0	0	0
Cronobacter_sakazakii	heavy_metal_resistance	pCS1	hypothetical_protein_579	0	0	0	0	0	0	0	0	0	0	0	0	0	0	0	0	0	0	0	0	0	0	0	0	0	0	0	0	0	0	0	0	0	0	0	0	0	0	0	0	0	0	0	0	0	0
Cronobacter_sakazakii	heavy_metal_resistance	pCS1	hypothetical_protein_642	0	0	0	0	0	0	0	0	0	0	0	0	0	0	0	0	0	0	0	0	0	0	0	0	0	0	0	0	0	0	0	0	0	0	0	0	0	0	0	97.82	0	0	97.82	0	0	0
Cronobacter_sakazakii	heavy_metal_resistance	pCS1	hypothetical_protein_645	0	0	0	0	0	0	0	0	0	0	0	0	0	0	0	0	0	0	0	0	0	0	0	0	0	0	0	0	0	0	0	0	0	0	0	0	0	0	0	98.29	0	0	98.29	0	0	0
Cronobacter_sakazakii	heavy_metal_resistance	pCS1	hypothetical_protein_648	0	0	0	0	0	0	0	0	0	0	0	0	0	0	0	0	0	0	0	0	0	0	0	0	0	0	0	0	0	0	0	0	0	0	0	0	0	0	0	96.76	0	0	96.76	0	0	0
Cronobacter_sakazakii	heavy_metal_resistance	pCS1	hypothetical_protein_651	0	0	0	0	0	0	0	0	0	0	0	0	0	0	0	0	0	0	0	0	0	0	0	0	0	0	0	0	0	0	0	0	0	0	0	0	0	0	0	79.96	0	0	79.96	0	0	0
Cronobacter_sakazakii	heavy_metal_resistance	pCS1	hypothetical_protein_678	0	0	0	0	0	0	0	0	0	0	0	0	0	0	0	0	0	0	0	0	0	0	0	0	0	0	0	0	0	0	0	0	0	0	0	0	0	0	0	0	0	0	0	0	0	0
Cronobacter_sakazakii	heavy_metal_resistance	pCS1	hypothetical_protein_726	0	0	0	0	0	0	0	0	0	0	0	0	0	0	0	0	0	0	0	0	0	0	0	0	0	0	0	0	0	0	0	0	0	0	0	0	0	0	0	87.09	0	0	87.09	0	0	0
Cronobacter_sakazakii	heavy_metal_resistance	pCS1	hypothetical_protein_747	0	0	0	0	0	0	0	0	0	0	0	0	0	0	0	0	0	0	0	0	0	0	0	0	0	0	0	0	0	0	0	0	0	0	0	0	0	0	0	99.33	0	0	99.33	0	0	0
Cronobacter_sakazakii	heavy_metal_resistance	pCS1	hypothetical_protein_780	0	0	0	0	0	0	0	0	0	0	0	0	0	0	0	0	0	0	0	0	0	0	0	0	0	0	0	0	0	0	0	0	0	0	0	0	0	0	0	0	0	0	0	0	0	0
Cronobacter_sakazakii	heavy_metal_resistance	pCS1	hypothetical_protein_795	0	0	0	0	0	0	0	0	0	0	0	0	0	0	0	0	0	0	0	0	0	0	0	0	0	0	0	0	0	0	0	0	0	0	0	0	0	0	0	96.23	0	0	96.23	0	0	0
Cronobacter_sakazakii	heavy_metal_resistance	pCS1	hypothetical_protein_804	0	0	0	0	0	0	0	0	0	0	0	0	0	0	0	0	0	0	0	0	0	0	0	0	0	0	0	0	0	0	0	0	0	0	0	0	0	0	0	97.51	0	0	97.51	0	0	0
Cronobacter_sakazakii	heavy_metal_resistance	pCS1	hypothetical_protein_834	0	0	0	0	0	0	0	0	0	0	0	0	0	0	0	0	0	0	0	0	0	0	0	0	0	0	0	0	0	0	0	0	0	0	0	0	0	0	0	97.12	0	0	97.12	0	0	0
Cronobacter_sakazakii	heavy_metal_resistance	pCS1	hypothetical_protein_891	0	0	0	0	0	0	0	0	0	0	0	0	0	0	0	0	0	0	0	0	0	0	0	0	0	0	0	0	0	0	0	0	0	0	0	0	0	0	0	0	0	0	0	0	0	0
Cronobacter_sakazakii	heavy_metal_resistance	pCS1	hypothetical_protein_894	0	0	0	0	0	0	0	0	0	0	0	0	0	0	0	0	0	0	0	0	0	0	0	0	0	0	0	0	0	0	0	0	0	0	0	0	0	0	0	97.65	0	0	97.65	0	0	0
Cronobacter_sakazakii	heavy_metal_resistance	pCS1	insN_for_insertion_sequence_element_IS911A	0	0	0	0	0	93.02	0	92.31	0	0	0	0	0	0	0	0	0	0	0	100	0	0	0	0	0	0	0	0	0	0	0	0	0	0	0	0	0	0	0	0	0	0	0	0	0	0
Cronobacter_sakazakii	heavy_metal_resistance	pCS1	integrase	0	0	0	0	0	0	0	0	0	0	0	0	0	0	0	0	0	0	0	0	0	0	0	0	0	0	0	0	0	0	0	0	0	0	0	0	0	0	0	97.55	0	0	97.55	0	0	0
Cronobacter_sakazakii	heavy_metal_resistance	pCS1	membrane_protein	0	0	0	0	0	0	0	0	0	0	0	0	0	0	0	0	0	0	0	0	0	0	0	0	0	0	0	0	0	0	0	0	0	0	0	0	0	0	0	93.36	0	0	93.36	0	0	0
Cronobacter_sakazakii	heavy_metal_resistance	pCS1	phage_N-6-adenine-methyltransferase	0	0	0	0	0	0	0	0	0	0	0	0	0	0	0	0	0	0	0	0	0	0	0	0	0	0	0	0	0	0	0	0	0	0	0	0	0	0	0	97.64	0	0	97.64	0	0	0
Cronobacter_sakazakii	heavy_metal_resistance	pCS1	phage_major_capsid_protein	0	0	0	0	0	0	0	0	0	0	0	0	0	0	0	0	0	0	0	0	0	0	0	0	0	0	0	0	0	0	0	0	0	0	0	0	0	0	0	97.05	0	0	97.05	0	0	0
Cronobacter_sakazakii	heavy_metal_resistance	pCS1	phage_minor_tail_protein_L	0	0	0	0	0	0	0	0	0	0	0	0	0	0	0	0	0	0	0	0	0	0	0	0	0	0	0	0	0	0	0	0	0	0	0	0	0	0	0	99.29	0	0	99.29	0	0	0
Cronobacter_sakazakii	heavy_metal_resistance	pCS1	phage_portal_protein	0	0	0	0	0	0	0	0	0	0	0	0	0	0	0	0	0	0	0	0	0	0	0	0	0	0	0	0	0	0	0	0	0	0	0	0	0	0	0	98.29	0	0	98.29	0	0	0
Cronobacter_sakazakii	heavy_metal_resistance	pCS1	phage_tail_length_tape_measure_protein	0	0	0	0	0	0	0	0	0	0	0	0	0	0	0	0	0	0	0	0	0	0	0	0	0	0	0	0	0	0	0	0	0	0	0	0	0	0	0	100	0	0	100	0	0	0
Cronobacter_sakazakii	heavy_metal_resistance	pCS1	phage_tail_protein	0	0	0	0	78.75	0	0	0	0	0	0	0	0	0	0	0	0	0	0	0	0	0	0	0	0	0	0	0	0	0	0	0	0	0	0	0	0	0	0	82.18	0	0	82.18	0	0	0
Cronobacter_sakazakii	heavy_metal_resistance	pCS1	phosphoribosyl-ATP_pyrophosphohydrolase	0	0	0	0	0	0	0	0	0	0	0	0	0	0	0	0	0	0	0	0	0	0	0	0	0	0	0	0	0	0	0	0	0	0	0	0	0	0	0	0	0	0	0	0	0	0
Cronobacter_sakazakii	heavy_metal_resistance	pCS1	plasmid_stability_protein	0	0	0	0	0	0	0	0	0	0	0	0	0	0	0	0	0	0	0	0	0	0	0	0	0	0	0	0	0	0	0	0	0	0	0	0	0	0	0	98.8	0	0	98.8	0	0	0
Cronobacter_sakazakii	heavy_metal_resistance	pCS1	porphyrin_biosynthesis_protein	0	0	0	0	0	0	0	0	0	0	0	0	0	0	0	0	0	0	0	0	0	0	0	0	0	0	0	0	0	0	0	0	0	0	0	0	0	0	0	100	0	0	100	0	0	0
Cronobacter_sakazakii	heavy_metal_resistance	pCS1	recombinase	0	0	0	0	0	0	0	0	0	0	0	0	0	0	0	0	0	0	0	0	0	0	0	0	0	0	0	0	0	0	0	0	0	0	0	0	0	0	0	98.98	0	0	98.98	0	0	0
Cronobacter_sakazakii	heavy_metal_resistance	pCS1	regulator	0	0	0	0	0	0	0	0	0	0	0	0	0	0	0	0	0	0	0	0	0	0	0	0	0	0	0	0	0	0	0	0	0	0	0	0	0	0	0	99.01	0	0	99.01	0	0	0
Cronobacter_sakazakii	heavy_metal_resistance	pCS1	replication_initiation_protein	0	0	0	0	0	0	0	0	0	0	0	0	0	0	0	0	0	0	0	0	0	0	0	0	0	0	0	0	0	0	0	0	0	0	0	0	0	0	0	97.91	0	0	97.91	0	0	0
Cronobacter_sakazakii	heavy_metal_resistance	pCS1	restriction_endonuclease_subunit_M	0	0	0	0	0	0	0	0	0	0	0	0	0	0	0	0	0	0	0	0	0	0	0	0	0	0	0	0	0	0	0	0	0	0	0	0	0	0	0	0	0	0	0	0	0	0
Cronobacter_sakazakii	heavy_metal_resistance	pCS1	restriction_endonuclease_subunit_S	0	0	0	0	0	0	0	0	0	0	0	0	0	0	0	0	0	0	0	0	0	0	0	0	0	0	0	0	0	0	0	0	0	0	0	0	0	0	0	0	0	0	0	0	0	0
Cronobacter_sakazakii	heavy_metal_resistance	pCS1	ribonuclease_HI	0	0	0	0	0	0	0	0	0	0	0	0	0	0	0	0	0	0	0	0	0	0	0	0	0	0	0	0	0	0	0	0	0	0	0	0	0	0	0	97.33	0	0	97.33	0	0	0
Cronobacter_sakazakii	heavy_metal_resistance	pCS1	ribonucleoside-diphosphate_reductase_subunit_alpha	0	0	0	0	0	0	0	0	0	0	0	0	0	0	0	0	0	0	0	0	0	0	0	0	0	0	0	0	0	0	0	0	0	0	0	0	0	0	0	98.55	0	0	98.55	0	0	0
Cronobacter_sakazakii	heavy_metal_resistance	pCS1	ribonucleotide-diphosphate_reductase_subunit_beta	0	0	0	0	0	0	0	0	0	0	0	0	0	0	0	0	0	0	0	0	0	0	0	0	0	0	0	0	0	0	0	0	0	0	0	0	0	0	0	98.86	0	0	98.86	0	0	0
Cronobacter_sakazakii	heavy_metal_resistance	pCS1	tail_assembly_protein	0	0	0	0	0	0	0	0	0	0	0	0	0	0	0	0	0	0	0	0	0	0	0	0	0	0	0	0	0	0	0	0	0	0	0	0	0	0	0	98.2	0	0	98.2	0	0	0
Cronobacter_sakazakii	heavy_metal_resistance	pCS1	tail_protein	0	0	0	0	0	0	0	0	0	0	0	0	0	0	0	0	0	0	0	0	0	0	0	0	0	0	0	0	0	0	0	0	0	0	0	0	0	0	0	100	0	0	100	0	0	0
Cronobacter_sakazakii	heavy_metal_resistance	pCS1	terminase	0	0	0	0	0	0	0	0	0	0	0	0	0	0	0	0	0	0	0	0	0	0	0	0	0	0	0	0	0	0	0	0	0	0	0	0	0	0	0	98.25	0	0	98.25	0	0	0
Cronobacter_sakazakii	heavy_metal_resistance	pCS1	thymidylate_synthase	0	0	0	0	0	0	0	0	0	0	0	0	0	0	0	0	0	0	0	0	0	0	0	0	0	0	0	0	0	0	0	0	0	0	0	0	0	0	0	97.74	0	0	97.74	0	0	0
Cronobacter_sakazakii	heavy_metal_resistance	pCS1	transcriptional_regulator	0	0	0	0	0	0	0	0	0	0	0	0	0	0	0	0	0	0	0	0	0	0	0	0	0	0	0	0	0	0	0	0	0	0	0	0	0	0	0	0	0	0	0	0	0	0
Cronobacter_sakazakii	heavy_metal_resistance	pCS1	transposase	0	93.94	100	95.08	0	0	0	89.02	0	0	0	100	0	100	95.45	88.64	0	93.18	93.18	0	0	100	88.26	88.26	88.26	88.26	88.26	88.26	88.26	88.26	88.26	88.26	88.26	88.26	0	0	0	0	0	0	95.45	95.45	0	0	0	88.64
Cronobacter_sakazakii	heavy_metal_resistance	pCS1	type_I_restriction-modification_system_subunit_M	0	0	0	0	0	0	0	0	0	0	0	0	0	0	0	0	0	0	0	0	0	0	0	0	0	0	0	0	0	0	0	0	0	0	0	0	0	0	0	0	0	0	0	0	0	0
Cronobacter_sakazakii	heavy_metal_resistance	pCS3	AbrB/MazE/SpoVT_family_DNA-binding_domain-containing_protein	0	0	0	0	0	0	86.58	85.71	0	86.58	0	0	0	0	0	0	0	0	0	0	0	0	0	0	0	0	0	0	0	0	0	0	0	0	0	0	0	0	0	0	0	0	0	0	0	0
Cronobacter_sakazakii	heavy_metal_resistance	pCS3	Cu(+)/Ag(+)_sensor_histidine_kinase	0	0	0	0	0	82.34	0	0	0	0	0	0	0	0	0	99.8	0	0	0	0	0	0	0	0	0	0	0	0	0	0	0	0	0	0	0	0	0	0	0	0	82.34	82.34	0	0	0	0
Cronobacter_sakazakii	heavy_metal_resistance	pCS3	Cu(I)/Ag(I)_efflux_RND_transporter_outer_membrane_protein	0	0	0	0	0	0	0	0	0	0	0	0	0	0	0	99.86	0	0	0	0	0	0	0	0	0	0	0	0	0	0	0	0	0	0	0	0	0	0	0	0	0	0	0	0	0	0
Cronobacter_sakazakii	heavy_metal_resistance	pCS3	CusA/CzcA_family_heavy_metal_efflux_RND_transporter	0	0	0	0	0	87.16	0	0	0	0	0	0	0	0	0	0	0	0	0	0	0	0	0	0	0	0	0	0	0	0	0	0	0	0	0	0	0	0	0	0	87.16	87.16	0	0	94.27	94.3
Cronobacter_sakazakii	heavy_metal_resistance	pCS3	DNA-binding_response_regulator	0	0	0	0	0	100	0	0	0	0	0	0	0	0	0	100	0	0	0	0	0	0	98.81	0	0	0	0	0	0	0	0	0	0	0	0	0	99.85	99.85	0	0	100	100	0	0	99.85	99.85
Cronobacter_sakazakii	heavy_metal_resistance	pCS3	DNA_partition_complex_ParG	0	0	0	0	0	97.5	99.17	0	0	99.17	0	0	0	0	0	97.92	0	0	0	0	0	0	0	0	0	0	0	0	0	0	0	0	0	0	0	0	98.33	98.33	0	0	99.17	99.17	0	0	0	0
Cronobacter_sakazakii	heavy_metal_resistance	pCS3	DUF1493_domain-containing_protein	0	0	0	0	0	0	96.6	100	0	96.6	0	0	0	0	0	100	0	99.46	99.66	0	0	0	0	0	0	0	0	0	0	0	0	0	0	0	0	0	0	0	0	0	0	0	0	0	0	0
Cronobacter_sakazakii	heavy_metal_resistance	pCS3	DUF2933_domain-containing_protein	0	0	0	0	0	0	0	0	0	0	0	0	0	0	0	100	0	0	0	0	0	0	0	0	0	0	0	0	0	0	0	0	0	0	0	0	0	0	0	0	0	0	0	0	0	0
Cronobacter_sakazakii	heavy_metal_resistance	pCS3	DUF305_domain-containing_protein	0	0	0	0	0	0	0	0	0	0	0	0	0	0	0	100	0	0	0	0	0	0	0	0	0	0	0	0	0	0	0	0	0	0	0	0	0	0	0	0	0	0	0	0	0	0
Cronobacter_sakazakii	heavy_metal_resistance	pCS3	DUF4225_domain-containing_protein	0	0	0	0	0	0	0	0	0	0	0	0	0	0	0	96.89	0	0	0	0	0	0	0	0	0	0	0	0	0	0	0	0	0	0	0	0	0	0	0	0	0	0	0	0	0	0
Cronobacter_sakazakii	heavy_metal_resistance	pCS3	DUF4238_domain-containing_protein	0	0	0	0	0	0	0	0	0	0	0	0	0	0	0	0	0	0	0	0	0	0	0	0	0	0	0	0	0	0	0	0	0	0	0	0	0	0	0	0	0	0	0	0	0	0
Cronobacter_sakazakii	heavy_metal_resistance	pCS3	HNH_endonuclease	0	0	0	0	0	0	0	0	0	0	0	0	0	0	0	99.89	0	0	0	0	0	0	0	0	0	0	0	0	0	0	0	0	0	0	0	0	0	0	0	0	0	0	0	0	0	0
Cronobacter_sakazakii	heavy_metal_resistance	pCS3	IMP_dehydrogenase	0	0	0	0	0	0	0	0	0	0	0	0	0	0	0	0	0	0	0	0	0	0	0	0	0	0	0	0	0	0	0	0	0	0	0	0	0	0	0	0	0	0	0	0	0	0
Cronobacter_sakazakii	heavy_metal_resistance	pCS3	IS3_family_transposase	0	89.96	100	89.14	0	84.1	100	86.6	0	100	0	100	0	0	91.32	86.2	0	100	100	0	0	100	87.5	87.5	87.5	87.5	87.5	87.5	87.5	87.5	87.5	87.5	87.5	87.5	0	0	0	0	0	0	0	0	0	0	0	87.88
Cronobacter_sakazakii	heavy_metal_resistance	pCS3	MFS_transporter	0	0	0	0	0	0	0	0	0	0	0	0	0	0	0	0	0	0	0	100	100	0	99.5	0	0	99.5	99.5	100	99.5	99.5	99.5	99.5	0	99.5	0	0	0	0	0	0	99.5	99.5	0	0	0	0
Cronobacter_sakazakii	heavy_metal_resistance	pCS3	MULTISPECIES:copper_resistance_system_metallochaperone_PcoE	0	0	0	0	0	82.76	0	0	0	0	0	0	0	0	0	99.77	0	0	0	0	0	0	0	0	0	0	0	0	0	0	0	0	0	0	0	0	99.77	99.77	0	0	82.76	82.76	0	0	0	0
Cronobacter_sakazakii	heavy_metal_resistance	pCS3	PIN_domain-containing_protein	0	0	0	0	0	0	0	81.59	0	0	0	0	0	0	0	0	0	0	0	0	0	0	0	0	0	0	0	0	0	0	0	0	0	0	0	0	0	0	0	0	0	0	0	0	0	0
Cronobacter_sakazakii	heavy_metal_resistance	pCS3	ParA_family_protein	0	0	0	0	0	98.71	99.19	99.03	0	99.19	0	0	0	0	0	99.03	0	0	0	0	0	0	0	0	0	0	0	0	0	0	0	0	0	0	0	0	99.03	98.87	0	0	99.03	99.03	0	0	0	0
Cronobacter_sakazakii	heavy_metal_resistance	pCS3	RES_domain-containing_protein	0	0	0	0	0	0	0	0	0	0	0	0	0	0	0	0	0	0	0	0	0	0	0	0	0	0	0	0	0	0	0	0	0	0	0	0	0	0	0	0	0	0	0	0	0	0
Cronobacter_sakazakii	heavy_metal_resistance	pCS3	RepB_family_plasmid_replication_initiator_protein	0	0	0	0	0	99.66	99.2	99.77	0	99.2	0	0	0	0	0	99.31	0	0	0	0	0	0	0	0	0	0	0	0	0	0	0	0	0	0	0	0	99.43	99.77	0	0	99.54	99.54	0	0	0	0
Cronobacter_sakazakii	heavy_metal_resistance	pCS3	SLATT_domain-containing_protein_	0	0	0	0	0	0	0	0	0	0	0	0	0	0	0	0	0	0	0	0	0	0	0	0	0	0	0	0	0	0	0	0	0	0	0	0	0	0	0	0	0	0	0	0	0	0
Cronobacter_sakazakii	heavy_metal_resistance	pCS3	abortive_infection_protein	0	0	0	0	0	0	0	0	0	0	0	0	0	0	0	0	0	0	0	0	0	0	0	0	0	0	0	0	0	0	0	0	0	0	0	0	0	0	0	0	0	0	0	0	0	0
Cronobacter_sakazakii	heavy_metal_resistance	pCS3	conjugal_transfer_protein	0	0	0	0	0	99.73	0	99.46	0	0	0	0	0	0	0	95.93	0	0	0	0	0	0	0	0	0	0	0	0	0	0	0	0	0	0	0	0	0	0	0	0	0	0	0	0	0	0
Cronobacter_sakazakii	heavy_metal_resistance	pCS3	copper-translocating_P-type_ATPase	0	0	0	0	0	83.28	0	0	0	0	0	0	0	0	0	97.59	0	0	0	0	0	0	0	0	0	0	0	0	0	0	0	0	0	0	0	0	0	0	0	0	0	0	0	0	95.75	95.83
Cronobacter_sakazakii	heavy_metal_resistance	pCS3	copper_ABC_transporter_substrate-binding_protein	0	0	0	0	0	0	0	0	0	0	0	0	0	0	0	98.59	0	0	0	0	0	0	0	0	0	0	0	0	0	0	0	0	0	0	0	0	0	0	0	0	0	0	0	0	95.2	95.2
Cronobacter_sakazakii	heavy_metal_resistance	pCS3	copper_resistance_protein_	0	0	0	0	0	0	0	0	0	0	0	0	0	0	0	99.33	0	0	0	0	0	0	0	0	0	0	0	0	0	0	0	0	0	0	0	0	99.56	99.54	0	0	0	0	0	0	99.78	99.78
Cronobacter_sakazakii	heavy_metal_resistance	pCS3	copper_resistance_protein_B	0	0	0	0	0	82.32	0	0	0	0	0	0	0	0	0	100	0	0	0	0	0	0	0	0	0	0	0	0	0	0	0	0	0	0	0	0	99.89	100	0	0	82.32	82.32	0	0	100	100
Cronobacter_sakazakii	heavy_metal_resistance	pCS3	copper_resistance_protein_D	0	0	0	0	0	0	0	0	0	0	0	0	0	0	0	100	0	0	0	0	0	0	0	0	0	0	0	0	0	0	0	0	0	0	0	0	99.89	99.89	0	0	0	0	0	0	99.89	99.89
Cronobacter_sakazakii	heavy_metal_resistance	pCS3	copper_resistance_system_chaperone_PcoC	0	0	0	0	0	0	0	0	0	0	0	0	0	0	0	99.74	0	0	0	0	0	0	0	0	0	0	0	0	0	0	0	0	0	0	0	0	99.74	100	0	0	0	0	0	0	100	100
Cronobacter_sakazakii	heavy_metal_resistance	pCS3	efflux_RND_transporter_periplasmic_adaptor_subunit	0	0	0	0	0	85.57	0	0	0	0	0	0	0	0	0	0	0	0	0	0	0	0	0	0	0	0	0	0	0	0	0	0	0	0	0	0	0	0	0	0	85.57	85.57	0	0	93.74	93.74
Cronobacter_sakazakii	heavy_metal_resistance	pCS3	hypothetical_protein_1374	0	0	0	0	0	0	0	0	0	0	0	0	0	0	0	0	0	0	0	0	0	0	0	0	0	0	0	0	0	0	0	0	0	0	0	0	0	0	0	0	0	0	0	0	0	0
Cronobacter_sakazakii	heavy_metal_resistance	pCS3	hypothetical_protein_180	0	0	0	0	0	90.64	94.74	0	0	94.74	0	0	0	0	0	0	0	99.42	99.42	0	0	0	0	0	0	0	0	0	0	0	0	0	0	0	0	0	0	0	0	0	90.64	90.64	0	0	0	0
Cronobacter_sakazakii	heavy_metal_resistance	pCS3	hypothetical_protein_189	0	0	0	0	0	93.18	100	100	0	93.98	0	0	0	0	0	93.23	0	0	99.47	0	0	0	0	0	0	0	0	0	0	0	0	0	0	0	0	0	88.67	88.67	0	0	96.21	96.21	0	0	0	0
Cronobacter_sakazakii	heavy_metal_resistance	pCS3	hypothetical_protein_219	0	0	0	0	0	98.17	0	96.35	0	0	0	0	0	0	0	98.17	0	0	0	0	0	0	0	0	0	0	0	0	0	0	0	0	0	0	0	0	0	0	0	0	0	0	0	0	0	0
Cronobacter_sakazakii	heavy_metal_resistance	pCS3	hypothetical_protein_222	0	0	0	0	0	0	0	0	0	0	0	0	0	0	0	0	0	0	0	0	0	0	0	0	0	0	0	0	0	0	0	0	0	0	0	0	0	0	0	0	0	0	0	0	0	0
Cronobacter_sakazakii	heavy_metal_resistance	pCS3	hypothetical_protein_255	0	0	0	0	0	0	0	0	0	0	0	0	0	0	0	0	0	0	0	0	0	0	0	0	0	0	0	0	0	0	0	0	0	0	0	0	0	0	0	0	0	0	0	0	0	0
Cronobacter_sakazakii	heavy_metal_resistance	pCS3	hypothetical_protein_285	0	0	0	0	0	99.65	0	98.95	0	0	0	0	0	0	0	98.6	0	0	0	0	0	0	0	0	0	0	0	0	0	0	0	0	0	0	0	0	98.6	0	0	0	0	0	0	0	0	0
Cronobacter_sakazakii	heavy_metal_resistance	pCS3	hypothetical_protein_294	0	0	0	0	0	0	0	0	0	0	0	0	0	0	0	0	0	0	0	0	0	0	0	0	0	0	0	0	0	0	0	0	0	0	0	0	0	0	0	0	0	0	0	0	0	0
Cronobacter_sakazakii	heavy_metal_resistance	pCS3	hypothetical_protein_303	0	0	0	0	0	100	0	99.67	0	0	0	0	0	0	0	100	0	0	0	0	0	0	0	0	0	0	0	0	0	0	0	0	0	0	0	0	0	0	0	0	99.01	99.01	0	0	0	0
Cronobacter_sakazakii	heavy_metal_resistance	pCS3	hypothetical_protein_324	0	0	0	0	0	0	0	0	0	0	0	0	0	0	0	95.99	0	0	0	0	0	0	0	0	0	0	0	0	0	0	0	0	0	0	0	0	0	0	0	0	0	0	0	0	0	0
Cronobacter_sakazakii	heavy_metal_resistance	pCS3	hypothetical_protein_441	0	0	0	0	0	0	0	0	0	0	0	0	0	0	0	0	0	0	0	0	0	0	0	0	0	0	0	0	0	0	0	0	0	0	0	0	0	0	0	0	0	0	0	0	0	0
Cronobacter_sakazakii	heavy_metal_resistance	pCS3	hypothetical_protein_633	0	0	0	0	0	100	86.67	99.5	0	86.67	0	0	0	0	0	99.67	0	0	0	0	0	0	0	0	0	0	0	0	0	0	0	0	0	0	0	0	0	0	0	0	0	0	0	0	0	0
Cronobacter_sakazakii	heavy_metal_resistance	pCS3	hypothetical_protein_705	0	0	0	0	0	0	0	0	0	0	0	0	0	0	0	0	0	0	99.72	0	0	0	0	0	0	0	0	0	0	0	0	0	0	0	0	0	0	0	0	0	0	0	0	0	0	0
Cronobacter_sakazakii	heavy_metal_resistance	pCS3	hypothetical_protein_927	0	0	0	0	0	0	0	0	0	0	0	0	0	0	0	0	0	0	0	0	0	0	0	0	0	0	0	0	0	0	0	0	0	0	0	0	0	0	0	0	0	0	0	0	0	0
Cronobacter_sakazakii	heavy_metal_resistance	pCS3	multicopper_oxidase_PcoA	0	0	0	0	0	86.41	0	0	0	0	0	0	0	0	0	99.94	0	0	0	0	0	0	0	0	0	0	0	0	0	0	0	0	0	0	0	0	99.94	99.89	0	0	86.41	86.41	0	0	99.67	99.83
Cronobacter_sakazakii	heavy_metal_resistance	pCS3	nucleotidyltransferase	0	0	0	0	0	0	0	0	0	0	0	0	0	0	0	0	0	0	0	0	0	0	0	0	0	0	0	0	0	0	0	0	0	0	0	0	0	0	0	0	0	0	0	0	0	0
Cronobacter_sakazakii	heavy_metal_resistance	pCS3	peptidase_M23	0	0	0	0	0	0	0	0	0	0	0	0	0	0	0	99.86	0	0	0	0	0	0	0	0	0	0	0	0	0	0	0	0	0	0	0	0	98.64	98.92	0	0	0	0	0	0	98.78	98.78
Cronobacter_sakazakii	heavy_metal_resistance	pCS3	phage_integrase_family_protein	0	0	0	0	0	99.62	100	99.87	0	93.54	0	0	0	0	0	99.37	0	94.79	94.7	0	0	0	0	0	0	0	0	0	0	0	0	0	0	0	0	0	0	98.99	0	0	92.47	92.47	0	0	0	0
Cronobacter_sakazakii	heavy_metal_resistance	pCS3	phage_related_protein	0	0	0	0	0	0	97.15	0	0	97.15	0	0	0	0	0	0	0	100	100	0	0	0	0	0	0	0	0	0	0	0	0	0	0	0	0	0	0	0	0	0	0	0	0	0	0	0
Cronobacter_sakazakii	heavy_metal_resistance	pCS3	sensor_domain-containing_diguanylate_cyclase	0	0	0	0	0	0	0	0	0	0	0	0	0	0	0	99.59	0	0	0	0	0	0	0	0	0	0	0	0	0	0	0	0	0	0	0	0	0	0	0	0	0	0	0	0	0	0
Cronobacter_sakazakii	heavy_metal_resistance	pCS3	sensor_histidine_kinase	0	0	0	0	0	84.59	0	0	0	0	0	0	0	0	0	99.64	0	0	0	0	0	0	0	0	0	0	0	0	0	0	0	0	0	0	0	0	99.57	99.64	0	0	84.59	84.59	0	0	99.36	99.29
Cronobacter_sakazakii	heavy_metal_resistance	pCS3	silver-binding_protein_SilE	0	0	0	0	0	0	0	0	0	0	0	0	0	0	0	100	0	0	0	0	0	0	0	0	0	0	0	0	0	0	0	0	0	0	0	0	0	0	0	0	0	0	0	0	91.45	91.45
Cronobacter_sakazakii	heavy_metal_resistance	pCS3	thioredoxin_domain-containing_protein	0	0	0	0	0	100	0	0	0	0	0	0	0	0	0	99.48	0	83.33	83.33	0	0	0	0	0	0	0	0	0	0	0	0	0	0	0	0	0	0	0	0	0	0	0	0	0	0	0
Cronobacter_sakazakii	heavy_metal_resistance	pCS3	transcriptional_regulator	0	0	0	0	0	0	0	0	0	0	0	0	0	0	0	0	0	0	0	0	0	0	0	0	0	0	0	0	0	0	0	0	0	0	0	0	0	0	0	0	0	0	0	0	0	0
Cronobacter_sakazakii	heavy_metal_resistance	pCS3	type_II_toxin-antitoxin_system_ParD_family_antitoxin	0	0	0	0	0	0	0	0	0	0	0	0	0	0	0	0	0	0	0	0	0	0	0	0	0	0	0	0	0	0	0	0	0	0	0	0	0	0	0	0	0	0	0	0	0	0
Cronobacter_sakazakii	heavy_metal_resistance	pCS3	type_II_toxin-antitoxin_system_RelE/ParE_family_toxin	0	0	0	0	0	0	0	0	0	0	0	0	0	0	0	0	0	0	0	0	0	0	0	0	0	0	0	0	0	0	0	0	0	0	0	0	0	0	0	0	0	0	0	0	0	0
Cronobacter_sakazakii	heavy_metal_resistance	pCS3	type_I_toxin-antitoxin_system_hok_family_toxin	0	0	0	0	0	99.37	100	98.74	0	98.74	0	0	0	0	0	98.74	0	98.8	0	0	0	0	0	0	0	0	0	0	0	0	0	0	0	0	0	0	0	98.74	0	0	98.11	98.11	0	0	0	0
Cronobacter_sakazakii	Prophage-plasmid	pH322_1	ABC_transporter,_ATP-binding_protein_639	0	0	0	0	0	0	0	0	0	0	0	0	0	0	0	0	0	0	0	0	0	0	0	0	0	0	0	0	0	0	0	0	0	0	0	0	0	0	0	86.64	0	0	86.64	0	0	0
Cronobacter_sakazakii	Prophage-plasmid	pH322_1	Chromosome_partitioning_protein_ParA_666	0	0	0	0	0	0	0	0	0	0	0	0	0	0	0	0	0	0	0	0	0	0	0	0	0	0	0	0	0	0	0	0	0	0	0	0	0	0	0	98.8	0	0	98.8	0	0	0
Cronobacter_sakazakii	Prophage-plasmid	pH322_1	CobS-like_protein_1236	0	0	0	0	0	0	0	0	0	0	0	0	0	0	0	0	0	0	0	0	0	0	0	0	0	0	0	0	0	0	0	0	0	0	0	0	0	0	0	98.87	0	0	98.87	0	0	0
Cronobacter_sakazakii	Prophage-plasmid	pH322_1	DNA_modification_methylase_669	0	0	0	0	0	0	0	0	0	0	0	0	0	0	0	0	0	0	0	0	0	0	0	0	0	0	0	0	0	0	0	0	0	0	0	0	0	0	0	96.26	0	0	96.26	0	0	0
Cronobacter_sakazakii	Prophage-plasmid	pH322_1	DNA_polymerase_III_alpha_subunit_(EC_2.7.7.7)_3507	0	0	0	0	0	0	0	0	0	0	0	0	0	0	0	0	0	0	0	0	0	0	0	0	0	0	0	0	0	0	0	0	0	0	0	0	0	0	0	100	0	0	100	0	0	0
Cronobacter_sakazakii	Prophage-plasmid	pH322_1	DNA_polymerase_III_epsilon_subunit_(EC_2.7.7.7)_543	0	0	0	0	0	0	0	0	0	0	0	0	0	0	0	0	0	0	0	0	0	0	0	0	0	0	0	0	0	0	0	0	0	0	0	0	0	0	0	98.88	0	0	98.88	0	0	0
Cronobacter_sakazakii	Prophage-plasmid	pH322_1	DNA_polymerase_I_5'-3'_exonuclease_domain_945	0	0	0	0	0	0	0	0	0	0	0	0	0	0	0	0	0	0	0	0	0	0	0	0	0	0	0	0	0	0	0	0	0	0	0	0	0	0	0	97.78	0	0	97.78	0	0	0
Cronobacter_sakazakii	Prophage-plasmid	pH322_1	DNA_primase_(EC_2.7.7.-)_1116	0	0	0	0	0	0	0	0	0	0	0	0	0	0	0	0	0	0	0	0	0	0	0	0	0	0	0	0	0	0	0	0	0	0	0	0	0	0	0	93.91	0	0	93.91	0	0	0
Cronobacter_sakazakii	Prophage-plasmid	pH322_1	DNA_replication_protein_1101	0	0	0	0	0	0	0	0	0	0	0	0	0	0	0	0	0	0	0	0	0	0	0	0	0	0	0	0	0	0	0	0	0	0	0	0	0	0	0	98.09	0	0	98.09	0	0	0
Cronobacter_sakazakii	Prophage-plasmid	pH322_1	Dihydrofolate_reductase_(EC_1.5.1.3)_477	0	0	0	0	0	0	0	0	0	0	0	0	0	0	0	0	0	0	0	0	0	0	0	0	0	0	0	0	0	0	0	0	0	0	0	0	0	0	0	97.48	0	0	97.48	0	0	0
Cronobacter_sakazakii	Prophage-plasmid	pH322_1	FIG001353:_Acetyltransferase_540	0	0	0	0	0	0	0	0	0	0	0	0	0	0	0	0	0	0	0	0	0	0	0	0	0	0	0	0	0	0	0	0	0	0	0	0	0	0	0	98.15	0	0	98.15	0	0	0
Cronobacter_sakazakii	Prophage-plasmid	pH322_1	FIG00925047:_hypothetical_protein_324	0	0	0	0	0	0	0	0	0	0	0	0	0	0	0	0	0	0	0	0	0	0	0	0	0	0	0	0	0	0	0	0	0	0	0	0	0	0	0	95.99	0	0	95.99	0	0	0
Cronobacter_sakazakii	Prophage-plasmid	pH322_1	FIG01048214:_hypothetical_protein_216	0	0	0	0	0	0	0	0	0	0	0	0	0	0	0	0	0	0	0	0	0	0	0	0	0	0	0	0	0	0	0	0	0	0	0	0	0	0	0	0	0	0	0	0	0	0
Cronobacter_sakazakii	Prophage-plasmid	pH322_1	FIG01048569:_hypothetical_protein_726	0	0	0	0	0	0	0	0	0	0	0	0	0	0	0	0	0	0	0	0	0	0	0	0	0	0	0	0	0	0	0	0	0	0	0	0	0	0	0	87.09	0	0	87.09	0	0	0
Cronobacter_sakazakii	Prophage-plasmid	pH322_1	FIG01048983:_hypothetical_protein_144	0	0	0	0	0	0	0	0	0	0	0	0	0	0	0	0	0	0	0	0	0	0	0	0	0	0	0	0	0	0	0	0	0	0	0	0	0	0	0	0	0	0	0	0	0	0
Cronobacter_sakazakii	Prophage-plasmid	pH322_1	FIG01048983:_hypothetical_protein_174	0	0	0	0	0	0	0	0	0	0	0	0	0	0	0	0	0	0	0	0	0	0	0	0	0	0	0	0	0	0	0	0	0	0	0	0	0	0	0	0	0	0	0	0	0	0
Cronobacter_sakazakii	Prophage-plasmid	pH322_1	FIG01049711:_hypothetical_protein_804	0	0	0	0	0	0	0	0	0	0	0	0	0	0	0	0	0	0	0	0	0	0	0	0	0	0	0	0	0	0	0	0	0	0	0	0	0	0	0	97.76	0	0	97.76	0	0	0
Cronobacter_sakazakii	Prophage-plasmid	pH322_1	FIG01049755:_hypothetical_protein_462	0	0	0	0	0	0	0	0	0	0	0	0	0	0	0	0	0	0	0	0	0	0	0	0	0	0	0	0	0	0	0	0	0	0	0	0	0	0	0	99.35	0	0	99.35	0	0	0
Cronobacter_sakazakii	Prophage-plasmid	pH322_1	FIG01049758:_hypothetical_protein_282	0	0	0	0	0	0	0	0	0	0	0	0	0	0	0	0	0	0	0	0	0	0	0	0	0	0	0	0	0	0	0	0	0	0	0	0	0	0	0	0	0	0	0	0	0	0
Cronobacter_sakazakii	Prophage-plasmid	pH322_1	FIG032766:_hypothetical_protein_270	0	0	0	0	0	0	0	0	0	0	0	0	0	0	0	0	0	0	0	0	0	0	0	0	0	0	0	0	0	0	0	0	0	0	0	0	0	0	0	100	0	0	100	0	0	0
Cronobacter_sakazakii	Prophage-plasmid	pH322_1	Glycosaminoglycan_attachment_site_1164	0	0	0	0	0	0	0	0	0	0	0	0	0	0	0	0	0	0	0	0	0	0	0	0	0	0	0	0	0	0	0	0	0	0	0	0	0	0	0	0	0	0	0	0	0	0
Cronobacter_sakazakii	Prophage-plasmid	pH322_1	Insertion_element_IS407_(Burkholderia_multivorans)_transposase_264	0	93.94	100	95.08	0	0	0	89.02	0	0	0	100	0	100	95.45	88.64	0	93.18	93.18	0	0	100	88.26	88.26	88.26	88.26	88.26	88.26	88.26	88.26	88.26	88.26	88.26	88.26	0	0	0	0	0	0	95.45	95.45	0	0	0	88.64
Cronobacter_sakazakii	Prophage-plasmid	pH322_1	Integrase_1104	0	0	0	0	0	0	0	0	0	0	0	0	0	0	0	0	0	0	0	0	0	0	0	0	0	0	0	0	0	0	0	0	0	0	0	0	0	0	0	97.37	0	0	97.37	0	0	0
Cronobacter_sakazakii	Prophage-plasmid	pH322_1	Mobile_element_protein_279	0	0	0	0	0	0	0	0	0	0	0	0	0	0	0	0	0	0	0	0	0	0	0	0	0	0	0	0	0	0	0	0	0	0	0	0	0	0	94.98	94.62	98.57	0	94.62	0	98.57	0
Cronobacter_sakazakii	Prophage-plasmid	pH322_1	Phage_exonuclease_1086	0	0	0	0	0	0	0	0	0	0	0	0	0	0	0	0	0	0	0	0	0	0	0	0	0	0	0	0	0	0	0	0	0	0	0	0	0	0	0	99.54	0	0	99.54	0	0	0
Cronobacter_sakazakii	Prophage-plasmid	pH322_1	Phage_tail_fiber,_side_tail_fiber_protein_Stf_2529	0	0	0	0	78.75	0	0	0	0	0	0	0	0	0	0	0	0	0	0	0	0	0	0	0	0	0	0	0	0	0	0	0	0	0	0	0	0	0	0	100	0	0	100	0	0	0
Cronobacter_sakazakii	Prophage-plasmid	pH322_1	Putative_DNA-binding_protein_564	0	0	0	0	0	0	0	0	0	0	0	0	0	0	0	0	0	0	0	0	0	0	0	0	0	0	0	0	0	0	0	0	0	0	0	0	0	0	0	98.58	0	0	98.58	0	0	0
Cronobacter_sakazakii	Prophage-plasmid	pH322_1	Putative_helicase_1560	0	0	0	0	0	0	0	0	0	0	0	0	0	0	0	0	0	0	0	0	0	0	0	0	0	0	0	0	0	0	0	0	0	0	0	0	0	0	0	100	0	0	100	0	0	0
Cronobacter_sakazakii	Prophage-plasmid	pH322_1	Putative_regulatory_protein_1011	0	0	0	0	0	0	0	0	0	0	0	0	0	0	0	0	0	0	0	0	0	0	0	0	0	0	0	0	0	0	0	0	0	0	0	0	0	0	0	98.32	0	0	98.32	0	0	0
Cronobacter_sakazakii	Prophage-plasmid	pH322_1	RecA-like_protein_1080	0	0	0	0	0	0	0	0	0	0	0	0	0	0	0	0	0	0	0	0	0	0	0	0	0	0	0	0	0	0	0	0	0	0	0	0	0	0	0	98.89	0	0	98.89	0	0	0
Cronobacter_sakazakii	Prophage-plasmid	pH322_1	Ribonuclease_HI_(EC_3.1.26.4)_597	0	0	0	0	0	0	0	0	0	0	0	0	0	0	0	0	0	0	0	0	0	0	0	0	0	0	0	0	0	0	0	0	0	0	0	0	0	0	0	98.83	0	0	98.83	0	0	0
Cronobacter_sakazakii	Prophage-plasmid	pH322_1	Ribonucleotide_reductase_of_class_Ia_(aerobic),_alpha_subunit_(EC_1.17.4.1)_2349	0	0	0	0	0	0	0	0	0	0	0	0	0	0	0	0	0	0	0	0	0	0	0	0	0	0	0	0	0	0	0	0	0	0	0	0	0	0	0	99.11	0	0	99.11	0	0	0
Cronobacter_sakazakii	Prophage-plasmid	pH322_1	Ribonucleotide_reductase_of_class_Ia_(aerobic),_beta_subunit_(EC_1.17.4.1)_1143	0	0	0	0	0	0	0	0	0	0	0	0	0	0	0	0	0	0	0	0	0	0	0	0	0	0	0	0	0	0	0	0	0	0	0	0	0	0	0	98.95	0	0	98.95	0	0	0
Cronobacter_sakazakii	Prophage-plasmid	pH322_1	Structural_protein_P5_693	0	0	0	0	0	0	0	0	0	0	0	0	0	0	0	0	0	0	0	0	0	0	0	0	0	0	0	0	0	0	0	0	0	0	0	0	0	0	0	93.36	0	0	93.36	0	0	0
Cronobacter_sakazakii	Prophage-plasmid	pH322_1	Thymidylate_synthase_(EC_2.1.1.45)_1104	0	0	0	0	0	0	0	0	0	0	0	0	0	0	0	0	0	0	0	0	0	0	0	0	0	0	0	0	0	0	0	0	0	0	0	0	0	0	0	98.91	0	0	98.91	0	0	0
Cronobacter_sakazakii	Prophage-plasmid	pH322_1	Transcriptional_regulator_522	0	0	0	0	0	0	0	0	0	0	0	0	0	0	0	0	0	0	0	0	0	0	0	0	0	0	0	0	0	0	0	0	0	0	0	0	0	0	0	0	0	0	0	0	0	0
Cronobacter_sakazakii	Prophage-plasmid	pH322_1	Transposase_312	0	90.06	86.26	91.35	0	86.58	86.9	86.58	0	86.9	0	91.35	0	100	100	86.9	88.62	86.9	86.9	0	0	100	90.42	90.42	90.42	90.42	90.42	90.42	90.42	90.42	90.42	90.42	90.42	90.42	0	0	0	0	0	0	86.26	86.26	0	0	0	91.05
Cronobacter_sakazakii	Prophage-plasmid	pH322_1	Transposase_510	0	89.17	86.81	89.37	0	0	0	87.2	0	0	0	89.57	0	0	0	86.61	0	88.89	87.01	0	0	89.57	0	0	0	0	0	0	0	0	0	0	0	0	0	0	0	0	0	0	0	0	0	0	0	0
Cronobacter_sakazakii	Prophage-plasmid	pH322_1	Transposase_813	0	0	0	0	0	0	0	0	0	0	0	0	0	0	0	0	0	0	0	0	0	0	0	0	0	0	0	0	0	0	0	0	0	0	0	0	0	0	96.8	88.88	97.46	0	88.88	0	98.77	0
Cronobacter_sakazakii	Prophage-plasmid	pH322_1	Transposase_InsN_for_insertion_sequence_element_IS911_303	0	0	0	0	0	0	0	100	0	0	0	0	0	0	0	0	0	0	0	100	100	0	0	0	0	0	0	0	0	0	0	0	0	0	0	0	0	0	0	0	0	0	0	0	0	0
Cronobacter_sakazakii	Prophage-plasmid	pH322_1	Transposase_InsO_for_insertion_sequence_element_IS911_375	0	0	0	0	0	0	0	0	0	0	0	0	0	0	0	0	0	0	0	83.87	83.87	0	0	0	0	0	0	0	0	0	0	0	0	0	0	0	0	0	0	0	100	100	0	0	99.47	0
Cronobacter_sakazakii	Prophage-plasmid	pH322_1	Transposase_InsO_for_insertion_sequence_element_IS911_471	0	0	0	0	0	86.27	0	0	0	0	0	0	0	0	0	0	0	0	0	0	0	0	0	0	0	0	0	0	0	0	0	0	0	0	0	0	0	0	0	0	98.3	98.3	0	0	100	0
Cronobacter_sakazakii	Prophage-plasmid	pH322_1	Transposase_InsO_for_insertion_sequence_element_IS911_840	0	0	0	0	0	85.54	0	0	0	0	0	0	0	0	0	0	0	0	0	84.06	83.93	0	0	0	0	0	0	0	0	0	0	0	0	0	0	0	0	0	0	0	100	100	0	0	100	0
Cronobacter_sakazakii	Prophage-plasmid	pH322_1	Type_I_restriction-modification_system,_DNA-methyltransferase_subunit_M_(EC_2.1.1.72)_645	0	0	0	0	0	0	0	0	0	0	0	0	0	0	0	0	0	0	0	0	0	0	0	0	0	0	0	0	0	0	0	0	0	0	0	0	0	0	0	0	0	0	0	0	0	0
Cronobacter_sakazakii	Prophage-plasmid	pH322_1	Type_I_restriction-modification_system,_DNA-methyltransferase_subunit_M_(EC_2.1.1.72)_921	0	0	0	0	0	92.47	0	92.13	0	0	0	0	0	0	0	0	0	0	0	100	0	0	0	0	0	0	0	0	0	0	0	0	0	0	0	0	0	0	0	0	0	0	0	0	0	0
Cronobacter_sakazakii	Prophage-plasmid	pH322_1	Type_I_restriction-modification_system,_restriction_subunit_R_(EC_3.1.21.3)_3117	0	0	0	0	0	0	0	0	0	0	0	0	0	0	0	0	0	0	0	0	0	0	0	0	0	0	0	0	0	0	0	0	0	0	0	0	0	0	0	0	0	0	0	0	0	0
Cronobacter_sakazakii	Prophage-plasmid	pH322_1	Type_I_restriction-modification_system,_specificity_subunit_S_1152	0	0	0	0	0	0	0	0	0	0	0	0	0	0	0	0	0	0	0	0	0	0	0	0	0	0	0	0	0	0	0	0	0	0	0	0	0	0	0	0	0	0	0	0	0	0
Cronobacter_sakazakii	Prophage-plasmid	pH322_1	hypothetical_protein_1107	0	0	0	0	0	0	0	0	0	0	0	0	0	0	0	0	0	0	0	0	0	0	0	0	0	0	0	0	0	0	0	0	0	0	0	0	0	0	0	0	0	0	0	0	0	0
Cronobacter_sakazakii	Prophage-plasmid	pH322_1	hypothetical_protein_117	0	0	0	0	0	0	0	0	0	0	0	0	0	0	0	0	0	0	0	0	0	0	0	0	0	0	0	0	0	0	0	0	0	0	0	0	0	0	0	98.29	0	0	98.29	0	0	0
Cronobacter_sakazakii	Prophage-plasmid	pH322_1	hypothetical_protein_1257	0	0	0	0	0	0	0	0	0	0	0	0	0	0	0	0	0	0	0	0	0	0	0	0	0	0	0	0	0	0	0	0	0	0	0	0	0	0	0	98.25	0	0	98.25	0	0	0
Cronobacter_sakazakii	Prophage-plasmid	pH322_1	hypothetical_protein_126	0	0	0	0	0	0	0	0	0	0	0	0	0	0	0	0	0	0	0	0	0	0	0	0	0	0	0	0	0	0	0	0	0	0	0	0	0	0	0	97.62	0	0	97.62	0	0	0
Cronobacter_sakazakii	Prophage-plasmid	pH322_1	hypothetical_protein_129	0	0	0	0	0	0	0	0	0	0	0	0	0	0	0	0	0	0	0	0	0	0	0	0	0	0	0	0	0	0	0	0	0	0	0	0	0	0	0	97.67	0	0	97.67	0	0	0
Cronobacter_sakazakii	Prophage-plasmid	pH322_1	hypothetical_protein_132	0	0	0	0	0	0	0	0	0	0	0	0	0	0	0	0	0	0	0	0	0	0	0	0	0	0	0	0	0	0	0	0	0	0	0	0	0	0	0	0	0	0	0	0	0	0
Cronobacter_sakazakii	Prophage-plasmid	pH322_1	hypothetical_protein_1323	0	0	0	0	0	0	0	0	0	0	0	0	0	0	0	0	0	0	0	0	0	0	0	0	0	0	0	0	0	0	0	0	0	0	0	0	0	0	0	96.17	0	0	96.17	0	0	0
Cronobacter_sakazakii	Prophage-plasmid	pH322_1	hypothetical_protein_1341	0	0	0	0	0	0	0	0	0	0	0	0	0	0	0	0	0	0	0	0	0	0	0	0	0	0	0	0	0	0	0	0	0	0	0	0	0	0	0	83.11	0	0	83.11	0	0	0
Cronobacter_sakazakii	Prophage-plasmid	pH322_1	hypothetical_protein_138	0	0	0	0	0	0	0	0	0	0	0	0	0	0	0	0	0	0	0	0	0	0	0	0	0	0	0	0	0	0	0	0	0	0	0	0	0	0	0	100	0	0	100	0	0	0
Cronobacter_sakazakii	Prophage-plasmid	pH322_1	hypothetical_protein_144	0	0	0	0	0	0	0	0	0	0	0	0	0	0	0	0	0	0	0	0	0	0	0	0	0	0	0	0	0	0	0	0	0	0	0	0	0	0	0	97.93	0	0	97.93	0	0	0
Cronobacter_sakazakii	Prophage-plasmid	pH322_1	hypothetical_protein_147	0	0	0	0	0	0	0	0	0	0	0	0	0	0	0	0	0	0	0	0	0	0	0	0	0	0	0	0	0	0	0	0	0	0	0	0	0	0	0	0	0	0	0	0	0	0
Cronobacter_sakazakii	Prophage-plasmid	pH322_1	hypothetical_protein_153	0	0	0	0	0	0	0	0	0	0	0	0	0	0	0	0	0	0	0	0	0	0	0	0	0	0	0	0	0	0	0	0	0	0	0	0	0	0	0	100	0	0	100	0	0	0
Cronobacter_sakazakii	Prophage-plasmid	pH322_1	hypothetical_protein_156	0	0	0	0	0	0	0	0	0	0	0	0	0	0	0	0	0	0	0	0	0	0	0	0	0	0	0	0	0	0	0	0	0	0	0	0	0	0	0	0	0	0	0	0	0	0
Cronobacter_sakazakii	Prophage-plasmid	pH322_1	hypothetical_protein_1575	0	0	0	0	0	0	0	0	0	0	0	0	0	0	0	0	0	0	0	0	0	0	0	0	0	0	0	0	0	0	0	0	0	0	0	0	0	0	0	98.29	0	0	98.29	0	0	0
Cronobacter_sakazakii	Prophage-plasmid	pH322_1	hypothetical_protein_162	0	0	0	0	0	0	0	0	0	0	0	0	0	0	0	0	0	0	0	0	0	0	0	0	0	0	0	0	0	0	0	0	0	0	0	0	0	0	0	99.38	0	0	99.38	0	0	0
Cronobacter_sakazakii	Prophage-plasmid	pH322_1	hypothetical_protein_1689	0	0	0	0	0	0	0	0	0	0	0	0	0	0	0	0	0	0	0	0	0	0	0	0	0	0	0	0	0	0	0	0	0	0	0	0	0	0	0	88.53	0	0	88.53	0	0	0
Cronobacter_sakazakii	Prophage-plasmid	pH322_1	hypothetical_protein_177	0	0	0	0	0	0	0	0	0	0	0	0	0	0	0	0	0	0	0	0	0	0	0	0	0	0	0	0	0	0	0	0	0	0	0	0	0	0	0	95.48	0	0	95.48	0	0	0
Cronobacter_sakazakii	Prophage-plasmid	pH322_1	hypothetical_protein_189	0	0	0	0	0	0	0	0	0	0	0	0	0	0	0	0	0	0	0	0	0	0	0	0	0	0	0	0	0	0	0	0	0	0	0	0	0	0	0	0	0	0	0	0	0	0
Cronobacter_sakazakii	Prophage-plasmid	pH322_1	hypothetical_protein_192	0	0	0	0	0	0	0	0	0	0	0	0	0	0	0	0	0	0	0	0	0	0	0	0	0	0	0	0	0	0	0	0	0	0	0	0	0	0	0	0	0	0	0	0	0	0
Cronobacter_sakazakii	Prophage-plasmid	pH322_1	hypothetical_protein_213	0	0	0	0	0	0	0	0	0	0	0	0	0	0	0	0	0	0	0	0	0	0	0	0	0	0	0	0	0	0	0	0	0	0	0	0	0	0	0	93.43	0	0	93.43	0	0	0
Cronobacter_sakazakii	Prophage-plasmid	pH322_1	hypothetical_protein_216	0	0	0	0	0	0	0	0	0	0	0	0	0	0	0	0	0	0	0	0	0	0	0	0	0	0	0	0	0	0	0	0	0	0	0	0	0	0	0	93.98	0	0	93.98	0	0	0
Cronobacter_sakazakii	Prophage-plasmid	pH322_1	hypothetical_protein_231	0	0	0	0	0	0	0	0	0	0	0	0	0	0	0	0	0	0	0	0	0	0	0	0	0	0	0	0	0	0	0	0	0	0	0	0	0	0	0	100	0	0	100	0	0	0
Cronobacter_sakazakii	Prophage-plasmid	pH322_1	hypothetical_protein_2331	0	0	0	0	0	0	0	0	0	0	0	0	0	0	0	0	0	0	0	0	0	0	0	0	0	0	0	0	0	0	0	0	0	0	0	0	0	0	0	95.5	0	0	95.5	0	0	0
Cronobacter_sakazakii	Prophage-plasmid	pH322_1	hypothetical_protein_234	0	0	0	0	0	0	0	0	0	0	0	0	0	0	0	0	0	0	0	0	0	0	0	0	0	0	0	0	0	0	0	0	0	0	0	0	0	0	0	99.15	0	0	99.15	0	0	0
Cronobacter_sakazakii	Prophage-plasmid	pH322_1	hypothetical_protein_240	0	0	0	0	0	0	0	0	0	0	0	0	0	0	0	0	0	0	0	0	0	0	0	0	0	0	0	0	0	0	0	0	0	0	0	0	0	0	0	0	0	0	0	0	0	0
Cronobacter_sakazakii	Prophage-plasmid	pH322_1	hypothetical_protein_252	0	0	0	0	0	0	0	0	0	0	0	0	0	0	0	0	0	0	0	0	0	0	0	0	0	0	0	0	0	0	0	0	0	0	0	0	0	0	0	97.22	0	0	97.22	0	0	0
Cronobacter_sakazakii	Prophage-plasmid	pH322_1	hypothetical_protein_255	0	0	0	0	0	0	0	0	0	0	0	0	0	0	0	0	0	0	0	0	0	0	0	0	0	0	0	0	0	0	0	0	0	0	0	0	0	0	0	0	0	0	0	0	0	0
Cronobacter_sakazakii	Prophage-plasmid	pH322_1	hypothetical_protein_267	0	0	0	0	0	0	0	0	0	0	0	0	0	0	0	0	0	0	0	0	0	0	0	0	0	0	0	0	0	0	0	0	0	0	0	0	0	0	0	100	0	0	100	0	0	0
Cronobacter_sakazakii	Prophage-plasmid	pH322_1	hypothetical_protein_270	0	0	0	0	0	0	0	0	0	0	0	0	0	0	0	0	0	0	0	0	0	0	0	0	0	0	0	0	0	0	0	0	0	0	0	0	0	0	0	98.52	0	0	98.52	0	0	0
Cronobacter_sakazakii	Prophage-plasmid	pH322_1	hypothetical_protein_276	0	0	0	0	0	0	0	0	0	0	0	0	0	0	0	0	0	0	0	0	0	0	0	0	0	0	0	0	0	0	0	0	0	0	0	0	0	0	0	94.2	0	0	94.2	0	0	0
Cronobacter_sakazakii	Prophage-plasmid	pH322_1	hypothetical_protein_279	0	0	0	0	0	0	0	0	0	0	0	0	0	0	0	0	0	0	0	0	0	0	0	0	0	0	0	0	0	0	0	0	0	0	0	0	0	0	0	100	0	0	100	0	0	0
Cronobacter_sakazakii	Prophage-plasmid	pH322_1	hypothetical_protein_288	0	0	0	0	0	0	0	0	0	0	0	0	0	0	0	0	0	0	0	0	0	0	0	0	0	0	0	0	0	0	0	0	0	0	0	0	0	0	0	97.57	0	0	97.57	0	0	0
Cronobacter_sakazakii	Prophage-plasmid	pH322_1	hypothetical_protein_300	0	0	0	0	0	0	0	0	0	0	0	0	0	0	0	0	0	0	0	0	0	0	0	0	0	0	0	0	0	0	0	0	0	0	0	0	0	0	0	0	0	0	0	0	0	0
Cronobacter_sakazakii	Prophage-plasmid	pH322_1	hypothetical_protein_306	0	0	0	0	0	0	0	0	0	0	0	0	0	0	0	0	0	0	0	0	0	0	0	0	0	0	0	0	0	0	0	0	0	0	0	0	0	0	0	98.37	0	0	98.37	0	0	0
Cronobacter_sakazakii	Prophage-plasmid	pH322_1	hypothetical_protein_309	0	0	0	0	0	0	0	0	0	0	0	0	0	0	0	0	0	0	0	0	0	0	0	0	0	0	0	0	0	0	0	0	0	0	0	0	0	0	0	97.72	0	0	97.72	0	0	0
Cronobacter_sakazakii	Prophage-plasmid	pH322_1	hypothetical_protein_318	0	0	0	0	0	0	0	0	0	0	0	0	0	0	0	0	0	0	0	0	0	0	0	0	0	0	0	0	0	0	0	0	0	0	0	0	0	0	0	94.34	0	0	94.34	0	0	0
Cronobacter_sakazakii	Prophage-plasmid	pH322_1	hypothetical_protein_327	0	0	0	0	0	0	0	0	0	0	0	0	0	0	0	0	0	0	0	0	0	0	0	0	0	0	0	0	0	0	0	0	0	0	0	0	0	0	0	96.02	0	0	96.02	0	0	0
Cronobacter_sakazakii	Prophage-plasmid	pH322_1	hypothetical_protein_339	0	0	0	0	0	0	0	0	0	0	0	0	0	0	0	0	0	0	0	0	0	0	0	0	0	0	0	0	0	0	0	0	0	0	0	0	0	0	0	89.38	0	0	89.38	0	0	0
Cronobacter_sakazakii	Prophage-plasmid	pH322_1	hypothetical_protein_345	0	0	0	0	0	0	0	0	0	0	0	0	0	0	0	0	0	0	0	0	0	0	0	0	0	0	0	0	0	0	0	0	0	0	0	0	0	0	0	98.26	0	0	98.26	0	0	0
Cronobacter_sakazakii	Prophage-plasmid	pH322_1	hypothetical_protein_357	0	0	0	0	0	0	0	0	0	0	0	0	0	0	0	0	0	0	0	0	0	0	0	0	0	0	0	0	0	0	0	0	0	0	0	0	0	0	0	0	0	0	0	0	0	0
Cronobacter_sakazakii	Prophage-plasmid	pH322_1	hypothetical_protein_360	0	0	0	0	0	0	0	0	0	0	0	0	0	0	0	0	0	0	0	0	0	0	0	0	0	0	0	0	0	0	0	0	0	0	0	0	0	0	0	97.47	0	0	97.47	0	0	0
Cronobacter_sakazakii	Prophage-plasmid	pH322_1	hypothetical_protein_384	0	0	0	0	0	0	0	0	0	0	0	0	0	0	0	0	0	0	0	0	0	0	0	0	0	0	0	0	0	0	0	0	0	0	0	0	0	0	0	99.48	0	0	99.48	0	0	0
Cronobacter_sakazakii	Prophage-plasmid	pH322_1	hypothetical_protein_387	0	0	0	0	0	0	0	0	0	0	0	0	0	0	0	0	0	0	0	0	0	0	0	0	0	0	0	0	0	0	0	0	0	0	0	0	0	0	0	90.18	0	0	90.18	0	0	0
Cronobacter_sakazakii	Prophage-plasmid	pH322_1	hypothetical_protein_414	0	0	0	0	0	0	0	0	0	0	0	0	0	0	0	0	0	0	0	0	0	0	0	0	0	0	0	0	0	0	0	0	0	0	0	0	0	0	0	99.28	0	0	99.28	0	0	0
Cronobacter_sakazakii	Prophage-plasmid	pH322_1	hypothetical_protein_417	0	0	0	0	0	0	0	0	0	0	0	0	0	0	0	0	0	0	0	0	0	0	0	0	0	0	0	0	0	0	0	0	0	0	0	0	0	0	0	97.84	0	0	97.84	0	0	0
Cronobacter_sakazakii	Prophage-plasmid	pH322_1	hypothetical_protein_420	0	0	0	0	0	0	0	0	0	0	0	0	0	0	0	0	0	0	0	0	0	0	0	0	0	0	0	0	0	0	0	0	0	0	0	0	0	0	0	100	0	0	100	0	0	0
Cronobacter_sakazakii	Prophage-plasmid	pH322_1	hypothetical_protein_426	0	0	0	0	0	0	0	0	0	0	0	0	0	0	0	0	0	0	0	0	0	0	0	0	0	0	0	0	0	0	0	0	0	0	0	0	0	0	0	98.8	0	0	98.8	0	0	0
Cronobacter_sakazakii	Prophage-plasmid	pH322_1	hypothetical_protein_432	0	0	0	0	0	0	0	0	0	0	0	0	0	0	0	0	0	0	0	0	0	0	0	0	0	0	0	0	0	0	0	0	0	0	0	0	0	0	0	97.22	0	0	97.22	0	0	0
Cronobacter_sakazakii	Prophage-plasmid	pH322_1	hypothetical_protein_435	0	0	0	0	0	0	0	0	0	0	0	0	0	0	0	0	0	0	0	0	0	0	0	0	0	0	0	0	0	0	0	0	0	0	0	0	0	0	0	97.01	0	0	97.01	0	0	0
Cronobacter_sakazakii	Prophage-plasmid	pH322_1	hypothetical_protein_444	0	0	0	0	0	0	0	0	0	0	0	0	0	0	0	0	0	0	0	0	0	0	0	0	0	0	0	0	0	0	0	0	0	0	0	0	0	0	0	99.1	0	0	99.1	0	0	0
Cronobacter_sakazakii	Prophage-plasmid	pH322_1	hypothetical_protein_453	0	0	0	0	0	0	0	0	0	0	0	0	0	0	0	0	0	0	0	0	0	0	0	0	0	0	0	0	0	0	0	0	0	0	0	0	0	0	0	92.94	0	0	92.94	0	0	0
Cronobacter_sakazakii	Prophage-plasmid	pH322_1	hypothetical_protein_465	0	0	0	0	0	0	0	0	0	0	0	0	0	0	0	0	0	0	0	0	0	0	0	0	0	0	0	0	0	0	0	0	0	0	0	0	0	0	0	95.36	0	0	95.36	0	0	0
Cronobacter_sakazakii	Prophage-plasmid	pH322_1	hypothetical_protein_474	0	0	0	0	0	0	0	0	0	0	0	0	0	0	0	0	0	0	0	0	0	0	0	0	0	0	0	0	0	0	0	0	0	0	0	0	0	0	0	97.89	0	0	97.89	0	0	0
Cronobacter_sakazakii	Prophage-plasmid	pH322_1	hypothetical_protein_477	0	0	0	0	0	0	0	0	0	0	0	0	0	0	0	0	0	0	0	0	0	0	0	0	0	0	0	0	0	0	0	0	0	0	0	0	0	0	0	98.95	0	0	98.95	0	0	0
Cronobacter_sakazakii	Prophage-plasmid	pH322_1	hypothetical_protein_483	0	0	0	0	0	0	0	0	0	0	0	0	0	0	0	0	0	0	0	0	0	0	0	0	0	0	0	0	0	0	0	0	0	0	0	0	0	0	0	96.69	0	0	96.69	0	0	0
Cronobacter_sakazakii	Prophage-plasmid	pH322_1	hypothetical_protein_504	0	0	0	0	0	0	0	0	0	0	0	0	0	0	0	0	0	0	0	0	0	0	0	0	0	0	0	0	0	0	0	0	0	0	0	0	0	0	0	0	0	0	0	0	0	0
Cronobacter_sakazakii	Prophage-plasmid	pH322_1	hypothetical_protein_531	0	0	0	0	0	0	0	0	0	0	0	0	0	0	0	0	0	0	0	0	0	0	0	0	0	0	0	0	0	0	0	0	0	0	0	0	0	0	0	0	0	0	0	0	0	0
Cronobacter_sakazakii	Prophage-plasmid	pH322_1	hypothetical_protein_579	0	0	0	0	0	0	0	0	0	0	0	0	0	0	0	0	0	0	0	0	0	0	0	0	0	0	0	0	0	0	0	0	0	0	0	0	0	0	0	0	0	0	0	0	0	0
Cronobacter_sakazakii	Prophage-plasmid	pH322_1	hypothetical_protein_615	0	0	0	0	0	0	0	0	0	0	0	0	0	0	0	0	0	0	0	0	0	0	0	0	0	0	0	0	0	0	0	0	0	0	0	0	0	0	0	86.41	0	0	86.41	0	0	0
Cronobacter_sakazakii	Prophage-plasmid	pH322_1	hypothetical_protein_636	0	0	0	0	0	0	0	0	0	0	0	0	0	0	0	0	0	0	0	0	0	0	0	0	0	0	0	0	0	0	0	0	0	0	0	0	0	0	0	0	0	0	0	0	0	0
Cronobacter_sakazakii	Prophage-plasmid	pH322_1	hypothetical_protein_642	0	0	0	0	0	0	0	0	0	0	0	0	0	0	0	0	0	0	0	0	0	0	0	0	0	0	0	0	0	0	0	0	0	0	0	0	0	0	0	97.82	0	0	97.82	0	0	0
Cronobacter_sakazakii	Prophage-plasmid	pH322_1	hypothetical_protein_645	0	0	0	0	0	0	0	0	0	0	0	0	0	0	0	0	0	0	0	0	0	0	0	0	0	0	0	0	0	0	0	0	0	0	0	0	0	0	0	98.6	0	0	98.6	0	0	0
Cronobacter_sakazakii	Prophage-plasmid	pH322_1	hypothetical_protein_648	0	0	0	0	0	0	0	0	0	0	0	0	0	0	0	0	0	0	0	0	0	0	0	0	0	0	0	0	0	0	0	0	0	0	0	0	0	0	0	96.76	0	0	96.76	0	0	0
Cronobacter_sakazakii	Prophage-plasmid	pH322_1	hypothetical_protein_651	0	0	0	0	0	0	0	0	0	0	0	0	0	0	0	0	0	0	0	0	0	0	0	0	0	0	0	0	0	0	0	0	0	0	0	0	0	0	0	79.74	0	0	79.74	0	0	0
Cronobacter_sakazakii	Prophage-plasmid	pH322_1	hypothetical_protein_684	0	0	0	0	0	0	0	0	0	0	0	0	0	0	0	0	0	0	0	0	0	0	0	0	0	0	0	0	0	0	0	0	0	0	0	0	0	0	0	99.27	0	0	99.27	0	0	0
Cronobacter_sakazakii	Prophage-plasmid	pH322_1	hypothetical_protein_747	0	0	0	0	0	0	0	0	0	0	0	0	0	0	0	0	0	0	0	0	0	0	0	0	0	0	0	0	0	0	0	0	0	0	0	0	0	0	0	98.53	0	0	98.53	0	0	0
Cronobacter_sakazakii	Prophage-plasmid	pH322_1	hypothetical_protein_780	0	0	0	0	0	0	0	0	0	0	0	0	0	0	0	0	0	0	0	0	0	0	0	0	0	0	0	0	0	0	0	0	0	0	0	0	0	0	0	0	0	0	0	0	0	0
Cronobacter_sakazakii	Prophage-plasmid	pH322_1	hypothetical_protein_795	0	0	0	0	0	0	0	0	0	0	0	0	0	0	0	0	0	0	0	0	0	0	0	0	0	0	0	0	0	0	0	0	0	0	0	0	0	0	0	96.23	0	0	96.23	0	0	0
Cronobacter_sakazakii	Prophage-plasmid	pH322_1	hypothetical_protein_834	0	0	0	0	0	0	0	0	0	0	0	0	0	0	0	0	0	0	0	0	0	0	0	0	0	0	0	0	0	0	0	0	0	0	0	0	0	0	0	97.12	0	0	97.12	0	0	0
Cronobacter_sakazakii	Prophage-plasmid	pH322_1	hypothetical_protein_876	0	0	0	0	0	0	0	0	0	0	0	0	0	0	0	0	0	0	0	0	0	0	0	0	0	0	0	0	0	0	0	0	0	0	0	0	0	0	0	98.4	0	0	98.4	0	0	0
Cronobacter_sakazakii	Prophage-plasmid	pH322_1	hypothetical_protein_882	0	0	0	0	0	0	0	0	0	0	0	0	0	0	0	0	0	0	0	0	0	0	0	0	0	0	0	0	0	0	0	0	0	0	0	0	0	0	0	97.05	0	0	97.05	0	0	0
Cronobacter_sakazakii	Prophage-plasmid	pH322_1	hypothetical_protein_891	0	0	0	0	0	0	0	0	0	0	0	0	0	0	0	0	0	0	0	0	0	0	0	0	0	0	0	0	0	0	0	0	0	0	0	0	0	0	0	94.61	0	0	94.61	0	0	0
Cronobacter_sakazakii	Prophage-plasmid	pH322_1	hypothetical_protein_894	0	0	0	0	0	0	0	0	0	0	0	0	0	0	0	0	0	0	0	0	0	0	0	0	0	0	0	0	0	0	0	0	0	0	0	0	0	0	0	97.65	0	0	97.65	0	0	0
Cronobacter_sakazakii	Prophage-plasmid	pH322_1	hypothetical_protein_99	0	0	0	0	0	0	0	0	0	0	0	0	0	0	0	0	0	0	0	0	0	0	0	0	0	0	0	0	0	0	0	0	0	0	0	0	0	0	0	0	0	0	0	0	0	0
Cronobacter_sakazakii	Prophage-plasmid	pH322_1	putative_C-type_natriuretic_protein_306	0	0	0	0	0	0	0	0	0	0	0	0	0	0	0	0	0	0	0	0	0	0	0	0	0	0	0	0	0	0	0	0	0	0	0	0	0	0	0	95.36	0	0	95.36	0	0	0
Cronobacter_sakazakii	Prophage-plasmid	pH322_1	putative_DNA_methylase_594	0	0	0	0	0	0	0	0	0	0	0	0	0	0	0	0	0	0	0	0	0	0	0	0	0	0	0	0	0	0	0	0	0	0	0	0	0	0	0	98.99	0	0	98.99	0	0	0
Cronobacter_sakazakii	Prophage-plasmid	pH322_1	putative_lipoprotein_300	0	0	0	0	0	0	0	0	0	0	0	0	0	0	0	0	0	0	0	0	0	0	0	0	0	0	0	0	0	0	0	0	0	0	0	0	0	0	0	0	0	0	0	0	0	0
Cronobacter_sakazakii	Prophage-plasmid	pH322_1	putative_membrane_protein_2715	0	0	0	0	0	0	0	0	0	0	0	0	0	0	0	0	0	0	0	0	0	0	0	0	0	0	0	0	0	0	0	0	0	0	0	0	0	0	0	100	0	0	100	0	0	0
Cronobacter_sakazakii	heavy_metal_resistance	pSP291-2	AbrB/MazE/SpoVT_family_DNA-binding_domain-containing_protein	0	0	0	0	0	0	86.58	85.71	0	86.58	0	0	0	0	0	0	0	0	0	0	0	0	0	0	0	0	0	0	0	0	0	0	0	0	0	0	0	0	0	0	0	0	0	0	0	0
Cronobacter_sakazakii	heavy_metal_resistance	pSP291-2	Cu(+)/Ag(+)_sensor_histidine_kinase	0	0	0	0	0	82.34	0	0	0	0	0	0	0	0	0	99.8	0	0	0	0	0	0	0	0	0	0	0	0	0	0	0	0	0	0	0	0	0	0	0	0	82.34	82.34	0	0	0	0
Cronobacter_sakazakii	heavy_metal_resistance	pSP291-2	Cu(I)/Ag(I)_efflux_RND_transporter_outer_membrane_protein	0	0	0	0	0	0	0	0	0	0	0	0	0	0	0	99.86	0	0	0	0	0	0	0	0	0	0	0	0	0	0	0	0	0	0	0	0	0	0	0	0	0	0	0	0	0	0
Cronobacter_sakazakii	heavy_metal_resistance	pSP291-2	CusA/CzcA_family_heavy_metal_efflux_RND_transporter	0	0	0	0	0	87.16	0	0	0	0	0	0	0	0	0	0	0	0	0	0	0	0	0	0	0	0	0	0	0	0	0	0	0	0	0	0	0	0	0	0	87.16	87.16	0	0	94.27	94.3
Cronobacter_sakazakii	heavy_metal_resistance	pSP291-2	DNA-binding_response_regulator	0	0	0	0	0	100	0	0	0	0	0	0	0	0	0	100	0	0	0	0	0	0	98.81	0	0	0	0	0	0	0	0	0	0	0	0	0	99.71	99.71	0	0	100	100	0	0	99.71	99.71
Cronobacter_sakazakii	heavy_metal_resistance	pSP291-2	DUF1493_domain-containing_protein	0	0	0	0	0	0	96.6	100	0	96.6	0	0	0	0	0	100	0	99.46	99.66	0	0	0	0	0	0	0	0	0	0	0	0	0	0	0	0	0	0	0	0	0	0	0	0	0	0	0
Cronobacter_sakazakii	heavy_metal_resistance	pSP291-2	DUF2933_domain-containing_protein	0	0	0	0	0	0	0	0	0	0	0	0	0	0	0	100	0	0	0	0	0	0	0	0	0	0	0	0	0	0	0	0	0	0	0	0	0	0	0	0	0	0	0	0	0	0
Cronobacter_sakazakii	heavy_metal_resistance	pSP291-2	DUF305_domain-containing_protein	0	0	0	0	0	0	0	0	0	0	0	0	0	0	0	100	0	0	0	0	0	0	0	0	0	0	0	0	0	0	0	0	0	0	0	0	0	0	0	0	0	0	0	0	0	0
Cronobacter_sakazakii	heavy_metal_resistance	pSP291-2	DUF4225_domain-containing_protein	0	0	0	0	0	0	0	0	0	0	0	0	0	0	0	96.89	0	0	0	0	0	0	0	0	0	0	0	0	0	0	0	0	0	0	0	0	0	0	0	0	0	0	0	0	0	0
Cronobacter_sakazakii	heavy_metal_resistance	pSP291-2	DUF4238_domain-containing_protein	0	0	0	0	0	0	0	0	0	0	0	0	0	0	0	0	0	0	0	0	0	0	0	0	0	0	0	0	0	0	0	0	0	0	0	0	0	0	0	0	0	0	0	0	0	0
Cronobacter_sakazakii	heavy_metal_resistance	pSP291-2	GGDEF_domain-containing_protein	0	0	0	0	0	0	0	0	0	0	0	0	0	0	0	99.49	0	0	0	0	0	0	0	0	0	0	0	0	0	0	0	0	0	0	0	0	0	0	0	0	0	0	0	0	0	0
Cronobacter_sakazakii	heavy_metal_resistance	pSP291-2	HAMP_domain-containing_protein	0	0	0	0	0	84.8	0	0	0	0	0	0	0	0	0	99.81	0	0	0	0	0	0	0	0	0	0	0	0	0	0	0	0	0	0	0	0	99.71	99.81	0	0	84.8	84.8	0	0	99.42	99.42
Cronobacter_sakazakii	heavy_metal_resistance	pSP291-2	HNH_endonuclease	0	0	0	0	0	0	0	0	0	0	0	0	0	0	0	99.78	0	0	0	0	0	0	0	0	0	0	0	0	0	0	0	0	0	0	0	0	0	0	0	0	0	0	0	0	0	0
Cronobacter_sakazakii	heavy_metal_resistance	pSP291-2	IMP_dehydrogenase	0	0	0	0	0	0	0	0	0	0	0	0	0	0	0	0	0	0	0	0	0	0	0	0	0	0	0	0	0	0	0	0	0	0	0	0	0	0	0	0	0	0	0	0	0	0
Cronobacter_sakazakii	heavy_metal_resistance	pSP291-2	MFS_transporter	0	0	0	0	0	0	0	0	0	0	0	0	0	0	0	0	0	0	0	100	100	0	99.5	0	0	99.5	99.5	100	99.5	99.5	99.5	99.5	0	99.5	0	0	0	0	0	0	99.5	99.5	0	0	0	0
Cronobacter_sakazakii	heavy_metal_resistance	pSP291-2	PIN_domain-containing_protein	0	0	0	0	0	0	0	81.59	0	0	0	0	0	0	0	0	0	0	0	0	0	0	0	0	0	0	0	0	0	0	0	0	0	0	0	0	0	0	0	0	0	0	0	0	0	0
Cronobacter_sakazakii	heavy_metal_resistance	pSP291-2	ParA_family_protein	0	0	0	0	0	98.71	99.19	99.03	0	99.19	0	0	0	0	0	99.03	0	0	0	0	0	0	0	0	0	0	0	0	0	0	0	0	0	0	0	0	99.03	98.87	0	0	99.03	99.03	0	0	0	0
Cronobacter_sakazakii	heavy_metal_resistance	pSP291-2	RepB_family_plasmid_replication_initiator_protein	0	0	0	0	0	99.66	99.2	99.77	0	99.2	0	0	0	0	0	99.31	0	0	0	0	0	0	0	0	0	0	0	0	0	0	0	0	0	0	0	0	99.43	99.77	0	0	99.54	99.54	0	0	0	0
Cronobacter_sakazakii	heavy_metal_resistance	pSP291-2	SLATT_domain-containing_protein	0	0	0	0	0	0	0	0	0	0	0	0	0	0	0	0	0	0	0	0	0	0	0	0	0	0	0	0	0	0	0	0	0	0	0	0	0	0	0	0	0	0	0	0	0	0
Cronobacter_sakazakii	heavy_metal_resistance	pSP291-2	conjugal_transfer_protein	0	0	0	0	0	99.73	0	99.46	0	0	0	0	0	0	0	95.93	0	0	0	0	0	0	0	0	0	0	0	0	0	0	0	0	0	0	0	0	0	0	0	0	0	0	0	0	0	0
Cronobacter_sakazakii	heavy_metal_resistance	pSP291-2	copper-translocating_P-type_ATPase	0	0	0	0	0	83.28	0	0	0	0	0	0	0	0	0	97.51	0	0	0	0	0	0	0	0	0	0	0	0	0	0	0	0	0	0	0	0	0	0	0	0	0	0	0	0	95.71	95.79
Cronobacter_sakazakii	heavy_metal_resistance	pSP291-2	copper/silver_response_regulator_transcription	0	0	0	0	0	0	0	0	0	0	0	0	0	0	0	0	0	0	99.57	0	0	0	0	0	0	0	0	0	0	0	0	0	0	0	0	0	0	0	0	0	0	0	0	0	0	0
Cronobacter_sakazakii	heavy_metal_resistance	pSP291-2	copper_ABC_transporter_substrate-binding_protein	0	0	0	0	0	0	0	0	0	0	0	0	0	0	0	98.59	0	0	0	0	0	0	0	0	0	0	0	0	0	0	0	0	0	0	0	0	0	0	0	0	0	0	0	0	95.2	95.2
Cronobacter_sakazakii	heavy_metal_resistance	pSP291-2	copper_oxidase	0	0	0	0	0	86.36	0	0	0	0	0	0	0	0	0	99.89	0	0	0	0	0	0	0	0	0	0	0	0	0	0	0	0	0	0	0	0	99.89	99.83	0	0	86.36	86.36	0	0	99.72	99.78
Cronobacter_sakazakii	heavy_metal_resistance	pSP291-2	copper_resistance_protein	0	0	0	0	0	0	0	0	0	0	0	0	0	0	0	99.33	0	0	0	0	0	0	0	0	0	0	0	0	0	0	0	0	0	0	0	0	99.56	99.54	0	0	0	0	0	0	99.78	99.78
Cronobacter_sakazakii	heavy_metal_resistance	pSP291-2	copper_resistance_protein_B	0	0	0	0	0	82.32	0	0	0	0	0	0	0	0	0	100	0	0	0	0	0	0	0	0	0	0	0	0	0	0	0	0	0	0	0	0	99.89	100	0	0	82.32	82.32	0	0	100	100
Cronobacter_sakazakii	heavy_metal_resistance	pSP291-2	copper_resistance_protein_D	0	0	0	0	0	0	0	0	0	0	0	0	0	0	0	100	0	0	0	0	0	0	0	0	0	0	0	0	0	0	0	0	0	0	0	0	99.89	99.89	0	0	0	0	0	0	99.89	99.89
Cronobacter_sakazakii	heavy_metal_resistance	pSP291-2	copper_resistance_system_chaperone_PcoC	0	0	0	0	0	0	0	0	0	0	0	0	0	0	0	99.74	0	0	0	0	0	0	0	0	0	0	0	0	0	0	0	0	0	0	0	0	99.74	100	0	0	0	0	0	0	100	100
Cronobacter_sakazakii	heavy_metal_resistance	pSP291-2	copper_resistance_system_metallochaperone_PcoE	0	0	0	0	0	82.76	0	0	0	0	0	0	0	0	0	99.77	0	0	0	0	0	0	0	0	0	0	0	0	0	0	0	0	0	0	0	0	99.77	99.77	0	0	82.76	82.76	0	0	0	0
Cronobacter_sakazakii	heavy_metal_resistance	pSP291-2	copper_response_regulator_transcription_factor_PcoR	0	0	0	0	0	100	86.67	99.5	0	86.67	0	0	0	0	0	99.67	0	0	0	0	0	0	0	0	0	0	0	0	0	0	0	0	0	0	0	0	0	0	0	0	0	0	0	0	0	0
Cronobacter_sakazakii	heavy_metal_resistance	pSP291-2	efflux_RND_transporter_periplasmic_adaptor_subunit	0	0	0	0	0	85.79	0	0	0	0	0	0	0	0	0	0	0	0	0	0	0	0	0	0	0	0	0	0	0	0	0	0	0	0	0	0	0	0	0	0	85.79	85.79	0	0	93.81	93.81
Cronobacter_sakazakii	heavy_metal_resistance	pSP291-2	hypothetical_protein_1374	0	0	0	0	0	0	0	0	0	0	0	0	0	0	0	0	0	0	0	0	0	0	0	0	0	0	0	0	0	0	0	0	0	0	0	0	0	0	0	0	0	0	0	0	0	0
Cronobacter_sakazakii	heavy_metal_resistance	pSP291-2	hypothetical_protein_180	0	0	0	0	0	90.64	94.74	0	0	94.74	0	0	0	0	0	0	0	99.42	99.42	0	0	0	0	0	0	0	0	0	0	0	0	0	0	0	0	0	0	0	0	0	90.64	90.64	0	0	0	0
Cronobacter_sakazakii	heavy_metal_resistance	pSP291-2	hypothetical_protein_219	0	0	0	0	0	98.17	0	96.35	0	0	0	0	0	0	0	98.17	0	0	0	0	0	0	0	0	0	0	0	0	0	0	0	0	0	0	0	0	0	0	0	0	0	0	0	0	0	0
Cronobacter_sakazakii	heavy_metal_resistance	pSP291-2	hypothetical_protein_222	0	0	0	0	0	0	0	0	0	0	0	0	0	0	0	0	0	0	0	0	0	0	0	0	0	0	0	0	0	0	0	0	0	0	0	0	0	0	0	0	0	0	0	0	0	0
Cronobacter_sakazakii	heavy_metal_resistance	pSP291-2	hypothetical_protein_255	0	0	0	0	0	0	0	0	0	0	0	0	0	0	0	0	0	0	0	0	0	0	0	0	0	0	0	0	0	0	0	0	0	0	0	0	0	0	0	0	0	0	0	0	0	0
Cronobacter_sakazakii	heavy_metal_resistance	pSP291-2	hypothetical_protein_285	0	0	0	0	0	99.65	0	98.95	0	0	0	0	0	0	0	98.6	0	0	0	0	0	0	0	0	0	0	0	0	0	0	0	0	0	0	0	0	98.6	0	0	0	0	0	0	0	0	0
Cronobacter_sakazakii	heavy_metal_resistance	pSP291-2	hypothetical_protein_294	0	0	0	0	0	0	0	0	0	0	0	0	0	0	0	0	0	0	0	0	0	0	0	0	0	0	0	0	0	0	0	0	0	0	0	0	0	0	0	0	0	0	0	0	0	0
Cronobacter_sakazakii	heavy_metal_resistance	pSP291-2	hypothetical_protein_303	0	0	0	0	0	100	0	99.67	0	0	0	0	0	0	0	100	0	0	0	0	0	0	0	0	0	0	0	0	0	0	0	0	0	0	0	0	0	0	0	0	99.01	99.01	0	0	0	0
Cronobacter_sakazakii	heavy_metal_resistance	pSP291-2	hypothetical_protein_309	0	0	0	0	0	97.18	92.38	95.65	0	92.38	0	0	0	0	0	91.5	0	0	91.48	0	0	0	0	0	0	0	0	0	0	0	0	0	0	0	0	0	0	92.05	0	0	94.74	94.74	0	0	0	0
Cronobacter_sakazakii	heavy_metal_resistance	pSP291-2	hypothetical_protein_324	0	0	0	0	0	0	0	0	0	0	0	0	0	0	0	95.99	0	0	0	0	0	0	0	0	0	0	0	0	0	0	0	0	0	0	0	0	0	0	0	0	0	0	0	0	0	0
Cronobacter_sakazakii	heavy_metal_resistance	pSP291-2	hypothetical_protein_441	0	0	0	0	0	0	0	0	0	0	0	0	0	0	0	0	0	0	0	0	0	0	0	0	0	0	0	0	0	0	0	0	0	0	0	0	0	0	0	0	0	0	0	0	0	0
Cronobacter_sakazakii	heavy_metal_resistance	pSP291-2	hypothetical_protein_456	0	0	0	0	0	0	97.15	0	0	97.15	0	0	0	0	0	0	0	100	100	0	0	0	0	0	0	0	0	0	0	0	0	0	0	0	0	0	0	0	0	0	0	0	0	0	0	0
Cronobacter_sakazakii	heavy_metal_resistance	pSP291-2	hypothetical_protein_633	0	0	0	0	0	100	86.67	99.5	0	86.67	0	0	0	0	0	99.67	0	0	0	0	0	0	0	0	0	0	0	0	0	0	0	0	0	0	0	0	0	0	0	0	0	0	0	0	0	0
Cronobacter_sakazakii	heavy_metal_resistance	pSP291-2	hypothetical_protein_704	0	0	0	0	0	0	0	0	0	0	0	0	0	0	0	0	0	0	99.57	0	0	0	0	0	0	0	0	0	0	0	0	0	0	0	0	0	0	0	0	0	0	0	0	0	0	0
Cronobacter_sakazakii	heavy_metal_resistance	pSP291-2	hypothetical_protein_927	0	0	0	0	0	0	0	0	0	0	0	0	0	0	0	0	0	0	0	0	0	0	0	0	0	0	0	0	0	0	0	0	0	0	0	0	0	0	0	0	0	0	0	0	0	0
Cronobacter_sakazakii	heavy_metal_resistance	pSP291-2	nucleotidyltransferase	0	0	0	0	0	0	0	0	0	0	0	0	0	0	0	0	0	0	0	0	0	0	0	0	0	0	0	0	0	0	0	0	0	0	0	0	0	0	0	0	0	0	0	0	0	0
Cronobacter_sakazakii	heavy_metal_resistance	pSP291-2	peptidase_M23	0	0	0	0	0	0	0	0	0	0	0	0	0	0	0	99.86	0	0	0	0	0	0	0	0	0	0	0	0	0	0	0	0	0	0	0	0	98.64	98.92	0	0	0	0	0	0	98.78	98.78
Cronobacter_sakazakii	heavy_metal_resistance	pSP291-2	phage_integrase_family_protein	0	0	0	0	0	99.62	100	99.87	0	93.54	0	0	0	0	0	99.37	0	94.79	94.7	0	0	0	0	0	0	0	0	0	0	0	0	0	0	0	0	0	0	98.99	0	0	92.47	92.47	0	0	0	0
Cronobacter_sakazakii	heavy_metal_resistance	pSP291-2	phage_related_protein	0	0	0	0	0	0	97.15	0	0	97.15	0	0	0	0	0	0	0	100	100	0	0	0	0	0	0	0	0	0	0	0	0	0	0	0	0	0	0	0	0	0	0	0	0	0	0	0
Cronobacter_sakazakii	heavy_metal_resistance	pSP291-2	silver-binding_protein_SilE	0	0	0	0	0	0	0	0	0	0	0	0	0	0	0	100	0	0	0	0	0	0	0	0	0	0	0	0	0	0	0	0	0	0	0	0	0	0	0	0	0	0	0	0	91.45	91.45
Cronobacter_sakazakii	heavy_metal_resistance	pSP291-2	transcriptional_regulator	0	0	0	0	0	0	0	0	0	0	0	0	0	0	0	0	0	0	0	0	0	0	0	0	0	0	0	0	0	0	0	0	0	0	0	0	0	0	0	0	0	0	0	0	0	0
Cronobacter_sakazakii	heavy_metal_resistance	pSP291-2	type_II_toxin-antitoxin_system_ParD_family_antitoxin	0	0	0	0	0	0	0	0	0	0	0	0	0	0	0	0	0	0	0	0	0	0	0	0	0	0	0	0	0	0	0	0	0	0	0	0	0	0	0	0	0	0	0	0	0	0
Cronobacter_sakazakii	heavy_metal_resistance	pSP291-2	type_II_toxin-antitoxin_system_RelE/ParE_family_toxin	0	0	0	0	0	0	0	0	0	0	0	0	0	0	0	0	0	0	0	0	0	0	0	0	0	0	0	0	0	0	0	0	0	0	0	0	0	0	0	0	0	0	0	0	0	0
Cronobacter_sakazakii	heavy_metal_resistance	pSP291-2	type_I_toxin-antitoxin_system_hok_family_toxin	0	0	0	0	0	99.37	100	98.74	0	98.74	0	0	0	0	0	98.74	0	98.8	0	0	0	0	0	0	0	0	0	0	0	0	0	0	0	0	0	0	0	98.74	0	0	98.11	98.11	0	0	0	0
Cronobacter_sakazakii	virulence_plasmid	CSAK29544_1p	AAA_family_ATPase	0	0	0	0	0	0	0	0	0	0	0	0	0	0	0	0	0	0	0	0	0	0	0	0	0	0	0	0	0	0	0	0	0	0	0	0	0	0	0	0	0	0	0	0	0	0
Cronobacter_sakazakii	virulence_plasmid	CSAK29544_1p	ABC_transporter_ATP-binding_protein	0	0	0	0	0	0	0	0	0	0	0	0	0	0	0	0	0	0	0	0	0	0	94.86	94.86	94.86	94.86	94.86	94.86	94.86	94.86	94.86	94.86	94.86	94.86	0	0	0	0	91.41	95.52	95.52	95.52	95.52	95.52	95.26	95.39
Cronobacter_sakazakii	virulence_plasmid	CSAK29544_1p	ATPase_AAA	0	0	0	0	0	0	0	0	0	0	0	0	0	0	0	0	0	0	0	0	0	0	0	0	0	0	0	0	0	0	0	0	0	0	0	0	0	0	0	0	0	0	0	0	0	0
Cronobacter_sakazakii	virulence_plasmid	CSAK29544_1p	DUF2534_domain-containing_protein	0	0	0	0	0	0	0	0	0	0	0	0	0	0	0	0	0	0	0	0	0	0	0	0	0	0	0	0	0	0	0	0	0	0	0	0	0	0	0	0	0	0	0	0	0	0
Cronobacter_sakazakii	virulence_plasmid	CSAK29544_1p	DUF2543_domain-containing_protein	0	0	0	0	0	0	0	0	0	0	0	0	0	0	0	0	0	0	0	0	0	0	0	0	0	0	0	0	0	0	0	0	0	0	0	0	0	0	0	0	0	0	0	0	0	0
Cronobacter_sakazakii	virulence_plasmid	CSAK29544_1p	DUF2931_domain-containing_protein	0	0	0	0	0	0	0	0	0	0	0	0	0	0	0	0	0	0	0	0	0	0	0	0	0	0	0	0	0	0	0	0	0	0	0	0	0	0	0	0	0	0	0	0	0	0
Cronobacter_sakazakii	virulence_plasmid	CSAK29544_1p	Exc2_family_lipoprotein	0	0	0	0	0	0	0	0	0	0	0	0	0	0	0	0	0	0	0	0	0	0	0	0	0	0	0	0	0	0	0	0	0	0	0	0	0	0	0	0	0	0	0	0	0	0
Cronobacter_sakazakii	virulence_plasmid	CSAK29544_1p	IS1_family_transposase	0	0	0	0	0	0	0	0	0	0	0	0	0	0	0	0	0	0	0	100	100	0	100	0	0	100	100	100	100	100	100	100	0	100	0	0	0	0	100	0	100	100	0	0	100	0
Cronobacter_sakazakii	virulence_plasmid	CSAK29544_1p	IucA/IucC_family_siderophore_biosynthesis_protein	0	0	0	0	0	0	90.77	0	91.58	0	0	0	0	0	0	0	0	0	0	0	0	0	95.65	95.65	95.65	95.65	95.65	95.65	95.65	95.65	95.65	95.65	95.65	95.65	0	0	0	0	95.96	0	0	0	0	0	96.22	95.65
Cronobacter_sakazakii	virulence_plasmid	CSAK29544_1p	L-lysine_6-monooxygenase	0	0	0	0	0	0	0	0	0	0	0	0	0	0	0	0	0	0	0	0	0	0	0	0	0	0	0	0	0	0	0	0	0	0	0	0	0	0	96.45	95.39	95.39	95.39	95.39	0	0	0
Cronobacter_sakazakii	virulence_plasmid	CSAK29544_1p	MBL_fold_hydrolase	0	0	0	0	0	0	0	0	0	0	0	0	0	0	0	0	0	0	0	0	0	0	0	0	0	0	0	0	0	0	0	0	0	0	0	0	0	0	0	0	0	0	0	0	0	0
Cronobacter_sakazakii	virulence_plasmid	CSAK29544_1p	MFS_transporter	0	0	0	0	0	0	0	0	95.45	0	0	0	0	0	0	0	0	0	0	0	0	0	0	0	0	0	0	0	0	0	0	0	0	0	0	0	0	0	95.59	0	0	0	0	0	0	0
Cronobacter_sakazakii	virulence_plasmid	CSAK29544_1p	N-acetyltransferase	0	0	0	0	0	0	0	0	0	0	0	0	0	0	0	0	0	0	0	0	0	0	0	0	0	0	0	0	0	0	0	0	0	0	0	0	0	0	0	0	0	0	0	0	0	0
Cronobacter_sakazakii	virulence_plasmid	CSAK29544_1p	PAAR_domain-containing_protein	0	0	0	0	0	0	0	0	0	0	0	0	0	0	0	0	0	0	0	0	0	0	0	0	0	0	0	0	0	0	0	0	0	0	0	0	0	0	0	0	0	0	0	0	0	0
Cronobacter_sakazakii	virulence_plasmid	CSAK29544_1p	ParA_family_protein	0	0	0	0	0	0	0	0	0	0	0	0	0	0	0	0	0	0	0	0	0	0	0	0	0	0	0	0	0	0	0	0	0	0	0	0	0	0	0	0	0	0	0	0	0	0
Cronobacter_sakazakii	virulence_plasmid	CSAK29544_1p	ParB/RepB/Spo0J_family_partition_protein	0	0	0	0	0	0	0	0	0	0	0	0	0	0	0	0	0	0	0	0	0	0	0	0	0	0	0	0	0	0	0	0	0	0	0	0	0	0	0	0	0	0	0	0	0	0
Cronobacter_sakazakii	virulence_plasmid	CSAK29544_1p	RepB_family_plasmid_replication_initiator_protein	0	0	0	0	0	0	0	0	0	0	0	0	0	0	0	0	0	0	0	0	0	0	0	0	0	0	0	0	0	0	0	0	0	0	0	0	0	0	0	0	0	0	0	0	0	0
Cronobacter_sakazakii	virulence_plasmid	CSAK29544_1p	SMI1/KNR4_family_protein	0	0	0	0	0	0	0	0	0	0	0	0	0	0	0	0	0	0	0	0	0	0	0	0	0	0	0	0	0	0	0	0	0	0	0	0	0	0	0	0	0	0	0	0	0	0
Cronobacter_sakazakii	virulence_plasmid	CSAK29544_1p	ShlA/HecA/FhaA_protein	0	100	100	100	100	0	100	86.09	100	100	0	100	88.97	100	0	86.08	0	86.03	86.03	0	0	0	100	100	100	100	100	100	100	100	100	100	100	100	0	0	0	0	100	100	100	100	100	100	100	100
Cronobacter_sakazakii	virulence_plasmid	CSAK29544_1p	ShlB/FhaC/HecB_family_hemolysin_secretion/activation_protein	0	0	0	0	0	0	0	0	0	0	0	0	0	0	0	0	0	0	0	0	0	0	0	0	0	0	0	0	0	0	0	0	0	0	0	0	0	0	0	0	0	0	0	0	0	0
Cronobacter_sakazakii	virulence_plasmid	CSAK29544_1p	TonB-dependent_siderophore_receptor	0	0	0	89.16	88.93	89.12	89.16	89.44	0	89.16	0	0	0	0	0	89.53	89.3	0	0	88.67	88.66	89.12	0	0	0	0	0	0	0	0	0	0	0	0	0	0	0	0	0	0	0	0	0	0	0	0
Cronobacter_sakazakii	virulence_plasmid	CSAK29544_1p	aerobactin_synthase_IucA	0	0	0	91.85	0	0	92.78	0	0	0	0	0	0	0	0	0	0	0	0	0	0	0	95.65	95.65	95.65	95.65	95.65	95.65	95.65	100	95.65	95.65	95.65	95.65	0	0	0	0	96.35	0	0	0	0	0	0	95.71
Cronobacter_sakazakii	virulence_plasmid	CSAK29544_1p	autotransporter_domain-containing_protein	0	0	0	0	0	0	0	0	0	0	0	0	0	0	0	0	0	0	0	0	0	0	0	0	0	0	0	0	0	0	0	0	0	98.67	0	0	0	0	0	0	0	0	0	0	0	0
Cronobacter_sakazakii	virulence_plasmid	CSAK29544_1p	copper-binding_protein	82.14	82.14	0	0	0	0	0	0	0	0	0	0	0	0	0	0	0	0	0	0	0	0	0	0	0	0	0	0	0	0	0	0	0	0	0	0	0	0	0	0	0	0	0	0	0	0
Cronobacter_sakazakii	virulence_plasmid	CSAK29544_1p	copper-sensitivity_suppressor	0	0	0	0	0	0	0	0	0	0	0	0	0	0	0	0	0	0	0	0	0	0	0	0	0	0	0	0	0	0	0	0	0	0	0	0	0	0	0	0	0	0	0	0	0	0
Cronobacter_sakazakii	virulence_plasmid	CSAK29544_1p	cupin_domain-containing_protein	0	0	0	0	0	0	0	0	0	0	0	0	0	0	0	0	0	0	0	0	0	0	0	0	0	0	0	0	0	0	0	0	0	0	0	0	0	0	0	0	0	0	0	0	0	0
Cronobacter_sakazakii	virulence_plasmid	CSAK29544_1p	glutathione_S-transferase_family_protein	0	0	0	0	0	0	0	0	0	0	0	0	0	0	0	0	0	0	0	0	0	0	0	0	0	0	0	0	0	0	96.4	0	0	0	0	0	0	0	0	0	0	0	0	0	0	0
Cronobacter_sakazakii	virulence_plasmid	CSAK29544_1p	glycogen_debranching_enzyme_GlgX	0	0	0	0	0	0	0	0	0	0	0	0	0	0	0	0	0	0	0	0	0	0	0	0	0	0	0	0	0	0	0	0	0	0	0	0	0	0	0	0	0	0	97.57	0	0	97.25
Cronobacter_sakazakii	virulence_plasmid	CSAK29544_1p	glycosyl_transferase	0	0	0	0	0	0	0	0	0	0	0	0	0	0	0	0	0	0	0	0	0	0	100	0	0	100	100	100	100	100	100	100	0	100	0	0	0	0	100	0	100	100	0	0	100	0
Cronobacter_sakazakii	virulence_plasmid	CSAK29544_1p	guanine_deaminase	0	0	0	0	0	0	0	0	0	0	0	0	0	0	0	0	0	0	0	0	0	0	0	0	0	0	0	0	0	0	0	0	0	0	0	0	0	0	0	0	0	0	0	0	0	0
Cronobacter_sakazakii	virulence_plasmid	CSAK29544_1p	helicase	0	0	0	0	0	0	74.36	0	0	74.36	0	0	0	0	0	0	0	0	0	0	0	0	0	0	0	0	0	0	0	0	0	0	0	0	0	0	0	0	0	0	0	0	0	94.78	0	0
[truncated: 871 more rows]
[truncated: 638 more columns]
